# Supplementary material for: Mycorrhiza-Tree-Herbivore Interactions: Alterations in Poplar Metabolome and Volatilome
Source: Metabolites. 2022 Jan 19;12(2):93. doi: 10.3390/metabo12020093 (PMC8880370; doi:10.3390/metabo12020093)
Supplement: Supplementary file 1 [file metabolites-12-00093-s001.zip]

Archive with 7 entries (7 files):
- Supplementary Figures.pdf
- Supplementary Table S1.xlsx
- Supplementary Table S2.xlsx
- Supplementary Table S3.xlsx
- Supplementary Table S4.xlsx
- Supplementary Table S5.xlsx
- Supplementary Table S6.xlsx
