# Supplementary material for: Mycorrhiza-Tree-Herbivore Interactions: Alterations in Poplar Metabolome and Volatilome
Source: Metabolites. 2022 Jan 19;12(2):93. doi: 10.3390/metabo12020093 (PMC8880370; doi:10.3390/metabo12020093)
Supplement: Supplementary file 1 [file metabolites-12-00093-s001.zip › Supplementary Table S1.xlsx]

## Sheet: significance
Supplementary Table S1: Significance of the different mass features over various treatments. The data are shown separately for negative and positive mode. The significantly modified metabolites for each treatment are given on the separate sheets. The raw data is given in the Supplementary Table S5
NC: non-mycorrhized control
MC: mycorrhized control
NB: non-mycorrhized with beetles
MB mycorrhized with beetles
1 = significant; P< 0.005
Name: Putative annotation as shown in Supplementary Table S6
			young leaves				old leaves				roots
Name	Sub.group	Mode	mb/mc	nb/nc	mc/nc	mb/nb	mb/mc	nb/nc	mc/nc	mb/nb	mb/mc	nb/nc	mc/nc	mb/nb
(5Z)-(3S)-1alpha,25-Dihydroxy-3-deoxy-3-thiavitamin D3 3-oxide	Vitamin D3	positive	0	0	0	0	0	1	0	0	0	0	0	0
(E,E)-Trichostachine	Benzodioxoles	positive	0	0	0	1	0	0	0	0	0	0	0	0
(S)-Rosmarinic acid	Coumaric acids	positive	0	0	1	0	0	0	0	0	0	0	0	0
1,2,3-Propanetricarboxylic acid	Tricarboxylic acids	negative	0	0	1	0	0	0	0	0	0	0	0	0
10,12,15-Octadecatrienoic acid	Unsaturated FA	positive	0	0	0	1	0	0	0	0	0	0	0	0
10-Methyl-heptadecanoic acid	Branched FA	positive	0	0	0	0	0	0	0	0	0	1	0	0
11E-Tetradecenoyl-CoA	Acyl CoAs	positive	0	0	1	1	0	0	0	0	0	0	0	0
11-O-Demethylpradinone II	Tetracenequinones	positive	0	0	1	0	0	0	0	0	0	0	0	0
11-trans-LTC4	Leukotrienes	positive	0	0	1	1	0	0	0	0	0	0	0	0
11Z-Eicosenoyl-CoA	Acyl CoAs	negative	0	0	1	0	0	0	0	0	0	0	0	0
12,13-EpOME(9)	Other Octadecanoids	negative	0	0	1	0	0	0	0	0	0	0	0	0
1-O-Sinapoyl-beta-D-glucose	Hydroxycinnamic acid glycosides	negative	0	0	1	0	0	0	0	0	0	0	0	0
2,3-bis(4-Hydroxyphenyl)propionitrile	Stilbenes	positive	0	0	0	0	0	0	0	0	0	0	0	0
2,3-bis-O-(Geranylgeranyl)glycerol 1-phosphate	C20 isoprenoids	positive	0	0	0	1	0	0	0	0	0	0	0	0
2,3-Epoxyphylloquinone	Vitamin K	negative	0	0	1	0	0	0	0	0	0	0	0	0
2,4-Dimethylaniline	Xylenes	positive	0	0	1	1	0	0	0	0	0	0	0	0
2,5-Dichloro-4-oxohex-2-enedioate	Halogenated FA	positive	0	0	1	0	0	1	0	0	0	0	0	0
2-Amino-4-chloro-6-methylpyrimidine	Halopyrimidines	positive	0	0	0	0	0	0	0	0	0	0	0	0
2-Amino-4-methylpentanoic acid	Amino FA	positive	0	0	1	1	0	0	0	0	0	0	0	0
2E,4E-Octadienoyl-CoA	Acyl CoAs	negative	0	0	0	0	0	0	0	0	0	0	0	0
2E-Decenoyl-CoA	Acyl CoAs	positive	0	0	1	1	0	0	0	0	0	0	0	0
2E-Hexenoyl-CoA	Acyl CoAs	negative	0	0	1	0	0	0	0	0	0	0	0	0
2-Methoxyestrone 3-glucuronide	Glucuronides	negative	0	0	0	1	0	0	0	0	0	0	0	0
2-Phosphoglyceric acid	Short-chain acids and derivatives	positive	0	0	0	0	0	0	0	0	0	0	0	0
3,4-Dihydro-2H-1-benzopyran-2-one	3,4-dihydrocoumarins	positive	0	0	1	1	0	0	0	0	0	0	0	0
3-Hydroxybutanoyl-CoA	Acyl CoAs	negative	0	0	1	0	0	0	0	0	0	0	0	0
3-Hydroxycinnamate sulfate	Coumaric acids	positive	0	0	0	0	0	0	0	0	0	0	0	0
3-Hydroxydecanoyl-CoA	Acyl CoAs	negative	0	0	0	0	1	0	0	0	0	0	0	0
3-Hydroxypristanoyl-CoA	Acyl CoAs	negative	0	0	0	0	0	0	0	0	0	0	0	0
3-O-Methylanhydrotuberosin	Pterocarpans	negative	0	0	0	0	0	0	0	0	0	0	0	0
3-tert-Butyl-5-methylcatechol	Phenylpropanes	positive	0	0	0	0	0	1	0	0	0	0	0	0
4-Acetamidobenzaldehyde	Acetanilides	positive	0	0	1	0	0	0	0	0	0	0	0	0
4-Acetamidobutanoic acid	Amino acids	positive	0	0	0	0	0	0	0	0	0	1	0	0
4-Amino-2-methyl-5-phosphomethylpyrimidine	Pyrimidines	positive	0	0	1	0	0	0	0	0	0	0	0	0
4-Bromophenylacetic acid	Bromobenzenes	positive	0	0	1	0	0	0	0	0	0	0	0	0
4-Dodecylbenzenesulfonic acid	Benzenesulfonic acids	negative	0	0	0	0	0	0	0	0	0	0	0	1
4-Fluoro-3-phenoxybenzoic acid	Diphenylethers	positive	0	1	0	1	0	0	0	0	0	0	0	0
4-Heptyloxyphenol	4-alkoxyphenols	positive	0	0	0	0	0	0	0	0	0	0	0	0
4-Hydroxybenzoic acid	Hydroxybenzoic acids	positive	0	0	1	0	0	0	0	0	0	0	0	0
4-Ketocyclophosphamide	Nitrogen mustard compounds	negative	0	0	1	0	0	0	0	0	0	0	0	0
5,5-Diethylbarbituric acid	Barbituric acid derivatives	positive	0	0	0	0	0	0	0	0	0	0	0	1
5,6,7,8-Tetrahydromethanopterin	Organooxygen compounds	negative	0	0	1	1	0	0	0	0	0	0	0	0
5,7,2'-Trihydroxy-3,6,4',5'-tetramethoxyflavone	Flavones and Flavonols	positive	0	0	1	1	0	0	1	1	0	0	0	0
5alpha-Cholanoic acid	C24 bile acids	positive	0	0	0	1	0	0	0	0	0	0	0	0
5'-Deoxy-5'-fluoroadenosine	Purine deoxyribonucleosides	positive	0	0	0	1	0	0	0	0	0	0	0	0
5-Methyltetrahydrofolic acid	Pterins	positive	0	0	0	1	0	0	0	0	0	0	0	0
6-Demethylsterigmatocystin	Aflatoxins and related substances	negative	0	0	1	1	0	0	0	0	0	0	0	0
6'''-Oxoneomycin C	Amino sugars	positive	0	0	1	1	0	0	0	0	0	0	0	0
7alpha-Hydroxy-3,12-dioxochola-1,4-dien-24-oic acid	C24 bile acids	positive	0	0	1	1	0	0	0	0	0	0	0	0
7-Aminoclonazepam	Benzodiazepines	positive	0	0	1	1	0	0	0	0	0	0	0	0
7-Oxo-cholestenone	Cholesterols	positive	0	0	1	0	0	0	0	0	0	0	0	0
Acetamidopropanal	Alpha-hydrogen aldehydes	positive	0	0	0	1	0	0	0	0	0	0	0	0
Acronycidine	Furanoquinolines	positive	0	0	1	1	0	0	0	0	0	0	0	0
Acronycine	Acridones	positive	0	0	0	0	0	0	0	0	0	0	0	0
Actinorhodin	Isochromanequinones	negative	0	0	0	0	0	0	0	0	0	0	0	0
Aggreticin	Anthraquinones	negative	0	0	0	0	0	0	0	0	0	0	0	0
Agrimol C	Linear diarylheptanoids	negative	0	0	0	1	0	0	0	0	0	0	0	0
Ala-Asp-Glu	Tripeptides	negative	0	0	0	0	0	0	0	0	0	0	0	0
Ala-Cys	Dipeptides	positive	0	0	0	1	0	0	0	0	0	0	0	0
Albanol B	2-arylbenzofuran flavonoids	negative	0	0	1	1	0	0	0	0	0	0	0	0
Allamandin	Terpene lactones	positive	0	0	1	0	0	0	0	0	0	0	0	0
Alliin	Amino acids	negative	0	0	0	1	0	0	0	0	0	0	0	0
All-trans-heptaprenyl diphosphate	Bactoprenol diphosphates	positive	0	0	0	0	0	1	0	0	0	0	0	0
alpha-Amanitin	Amino acids	negative	0	0	1	1	0	0	0	0	0	0	0	0
alpha-Antiarin	Steroid lactones	positive	0	0	0	0	0	0	0	0	0	0	0	0
alpha-Cyclohexylmandelic acid	Benzenes	positive	0	0	0	0	0	0	0	0	0	0	0	0
Antirrhinoside	O-glycosyl compounds	positive	0	0	1	0	0	0	0	0	0	0	0	0
Apigenin-7-O-glucoside	Flavonoid glycosides	positive	0	0	0	0	1	1	0	0	0	0	0	0
Arbutin	O-glycosyl compounds	negative	0	0	1	0	0	0	0	0	0	0	0	0
Arg-Asp-Cys	Tripeptides	positive	0	0	1	1	0	0	0	0	0	0	0	0
Arg-Cys-Tyr	Tripeptides	positive	0	0	0	0	0	0	0	0	0	0	0	0
Arg-Gln-Pro	Tripeptides	positive	0	0	1	1	0	0	0	0	0	0	0	0
Arginine	Amino acids	positive	0	0	1	0	0	0	0	0	0	0	0	0
Arg-Lys-Pro	Tripeptides	positive	0	0	1	1	0	0	0	0	0	0	0	0
Arg-Trp-Tyr	Tripeptides	positive	0	0	0	1	0	0	0	0	0	0	0	0
Asn-Asp-Asp	Tripeptides	negative	0	0	1	0	0	0	0	0	0	0	0	0
Asn-Cys-Pro	Tripeptides	negative	0	0	0	0	0	0	0	0	0	0	0	0
Asn-Met-Phe	Tripeptides	negative	0	0	0	0	1	0	0	0	0	0	0	0
Asn-Met-Ser	Tripeptides	positive	0	0	0	0	0	0	0	0	0	0	0	1
Asn-Thr-Trp	Tripeptides	positive	0	0	0	0	0	0	0	0	1	0	0	0
Asp-Cys-Met	Tripeptides	positive	0	0	1	1	0	0	0	0	0	0	0	0
Asp-Cys-Ser	Tripeptides	negative	0	0	0	1	0	0	0	0	0	0	0	0
Asp-Glu-Trp	Tripeptides	positive	0	0	1	1	0	0	0	0	0	0	0	0
Asp-His-His	Tripeptides	positive	0	0	1	1	0	0	0	0	0	0	0	0
Asp-Tyr-Tyr	Tripeptides	positive	0	0	0	0	0	0	0	0	0	0	0	0
Atovaquone	Naphthoquinones	positive	0	0	1	0	0	0	0	0	0	0	0	0
Azadirachtin A	C30 isoprenoids	negative	0	0	1	1	0	0	1	1	0	0	0	0
Azidopine	Trifluoromethylbenzenes	positive	0	0	1	1	0	0	0	0	0	0	0	0
Benzaldehyde	Benzoyl derivatives	positive	0	0	1	1	0	0	0	0	0	0	0	0
Benzyl Benzoate	Benzoic acids	positive	0	0	0	0	0	0	0	0	0	0	0	0
Benzyloxycarbonylarginyl-arginine 4-methylcoumarin-7-ylamide	Amino acids	positive	0	0	1	1	0	0	0	0	0	0	0	0
beta-Tyrosine	Amino acids	positive	0	0	1	1	0	0	0	0	0	0	0	0
Bromocriptine	Lysergic acids	negative	0	0	0	1	0	0	0	0	0	0	0	0
Bryotoxin A	Bufanolides	negative	0	0	1	1	0	0	0	0	0	0	0	0
Butyryl-CoA	Acyl CoAs	positive	0	0	0	1	0	0	0	0	0	0	0	0
C19 Sphingosine 1-phosphate	Sphingoid base 1-P	positive	0	0	0	0	0	1	0	0	0	0	0	0
Calcein AM	1-benzopyrans	negative	0	0	0	0	0	0	0	0	0	0	0	1
Calophyllolide	Neoflavonoids	positive	0	0	0	0	0	0	0	0	0	0	0	0
Capsanthin	C40 isoprenoids	positive	0	0	0	1	0	0	0	1	0	0	0	0
CAR(13:2)	Acyl carnitines	positive	0	0	1	1	0	0	0	0	0	0	0	0
CAR(DC8:0)	Short-chain acyl carnitines	positive	0	0	0	0	0	0	0	0	0	0	0	0
Carboxytolbutamide	Benzenesulfonyl compounds	negative	0	0	1	0	0	0	0	0	0	0	0	0
Carlinoside	Flavonoid glycosides	negative	0	0	1	1	0	1	0	0	0	0	0	0
Carminomycin	Anthracyclines	positive	0	0	0	0	0	0	0	0	0	0	0	0
Catechin	Flavans, Flavanols and Leucoanthocyanidins	positive	0	0	1	1	0	0	0	0	0	0	0	0
Cefoperazone	Cephalosporins	negative	0	0	1	1	0	0	0	0	0	0	0	0
Cephalomannine	C20 isoprenoids	positive	0	0	0	1	0	0	0	0	0	0	0	0
Cer(d14:0/13:0)	DHCer	positive	0	0	1	1	0	0	0	0	0	0	0	0
Cer(d14:0/14:0)	DHCer	positive	0	0	0	1	0	0	0	0	0	0	0	0
Cer(d14:1/15:1)	Cer	positive	0	0	0	1	0	0	0	1	0	0	0	0
Cer(d14:2/24:4)	Cer	positive	0	0	0	0	0	0	0	0	0	0	0	1
Cer(d14:2/32:0)	Cer	positive	0	0	1	0	0	0	0	0	0	0	0	0
Cer(d18:0/26:0(OH))	DHCer	positive	0	0	0	0	0	0	1	0	0	0	0	0
Cer(m32:0)	Cer	positive	0	0	1	0	0	0	0	0	0	0	0	0
Cer(t17:0/26:0(OH))	PhytoCer	positive	0	0	0	0	0	0	0	0	0	0	0	1
Cerbertin	Cardenolide glycosides	positive	0	0	0	1	0	0	0	0	0	0	0	0
Cercosporin	Perylenequinones	positive	0	0	0	1	0	0	0	0	0	0	0	0
CerP(d14:0/18:4)	Cer-1-P	positive	0	0	0	1	0	0	0	1	0	0	0	0
CerP(d15:1/20:5)	Cer-1-P	negative	0	0	0	0	0	0	0	0	0	0	0	0
CerP(d21:0/39:0)	Cer-1-P	negative	0	0	0	0	0	0	0	0	0	1	0	0
CHAPS	C24 bile acids	positive	0	0	0	0	0	0	0	0	0	0	0	0
Chelirubine	Quaternary benzophenanthridine alkaloids	positive	0	0	1	0	0	0	0	0	0	0	0	0
Chlorophyll B	Chlorins	negative	0	0	0	1	0	0	0	1	0	0	0	0
Chlorophyllide b	Metallotetrapyrroles	positive	0	0	0	1	0	0	0	0	0	0	0	0
Chlorpropamide	Benzenesulfonyl compounds	negative	0	0	0	0	0	0	0	0	0	1	0	0
Cholest-5-ene	Cholesterols	positive	0	0	1	0	0	0	0	0	0	0	0	0
Choline phosphate	Cholines	positive	0	0	0	0	0	0	0	0	0	0	0	1
Chymostatin	Dipeptides	positive	0	0	1	1	0	0	0	0	0	0	0	0
Cis-4-carboxymethylenebut-2-en-4-olide	Butenolides	positive	0	0	0	0	0	0	0	0	0	0	0	0
cis-Erucic acid	Unsaturated FA	positive	0	0	0	1	0	0	0	0	0	0	0	0
Clavulone I	Clavulones	positive	0	0	0	0	0	0	0	0	0	0	0	0
CMP-2-trimethylaminoethylphosphonate	Pentose phosphates	positive	0	0	0	1	0	0	1	1	0	0	0	0
CMP-N-glycoloylneuraminate	Pyrimidine deoxyribonucleoside monophosphates	negative	0	0	0	1	0	0	0	1	0	0	0	0
Cobalt-precorrin-6B	Corrinoids	positive	0	0	1	0	0	0	0	0	0	0	0	0
Coenzyme F420-1	Amino acids	positive	0	0	1	1	0	0	0	0	0	0	0	0
Coproporphyrin I	Porphyrins	positive	0	0	1	1	0	0	0	0	0	0	0	0
Coumarin	Coumarins	positive	0	0	1	0	0	0	0	0	0	0	0	0
Coumeroic acid	Hydroxycoumarins	positive	0	0	0	0	0	0	0	0	0	0	0	0
Coumestrol	Coumestan flavonoids	positive	0	0	0	1	0	0	0	0	0	0	0	0
Cromoglicic acid	1-benzopyrans	positive	0	0	0	1	0	0	0	0	0	0	0	0
Cucurbitacin F	Cholesterols	positive	0	0	1	1	0	0	0	0	0	0	0	0
Cyanidin 3-O-(6-O-malonyl-beta-D-glucoside)	Flavonoid glycosides	positive	0	0	0	1	0	0	0	0	0	0	0	0
Cyanidin 3-rutinoside-5-glucoside	Flavonoid glycosides	negative	0	0	1	0	0	0	0	0	0	0	0	0
Cyclic di-AMP	Purine ribonucleoside monophosphates	negative	0	0	1	0	0	0	0	0	0	0	0	0
Cyclothialidine	Amino acids	positive	0	0	0	0	0	0	0	0	0	0	1	0
Cys-Gln-His	Tripeptides	positive	0	0	0	1	0	0	0	0	0	0	0	0
Cys-Gln-Tyr	Tripeptides	positive	0	0	1	0	0	0	0	0	0	0	0	0
Cys-Glu-Tyr	Tripeptides	positive	0	0	1	0	0	0	0	0	0	0	0	0
Cys-Gly-His	Tripeptides	positive	0	0	0	1	0	0	1	1	0	0	0	0
Cys-Met-Trp	Tripeptides	negative	0	0	1	1	0	0	0	0	0	0	0	0
Cys-Met-Tyr	Tripeptides	positive	0	0	0	1	0	0	0	1	0	0	0	0
Cystathionine ketimine	Amino acids	positive	0	0	0	0	0	0	0	0	0	0	0	0
Cytidine monophosphate N-acetylneuraminic acid	Pyrimidine nucleotide sugars	negative	0	0	1	1	0	0	0	0	0	0	0	0
dCMP	Pyrimidine deoxyribonucleoside monophosphates	positive	0	0	1	0	0	0	0	0	0	0	0	0
dCpdC	Dideoxyribonucleotides	positive	0	0	0	0	0	0	0	0	0	0	0	0
Dehydroascorbic acid dimer	Isosorbides	negative	0	0	0	1	0	0	0	0	0	0	0	0
Dehydroemetine	Tetrahydroisoquinolines	positive	0	0	0	1	0	0	0	0	0	0	0	0
Deinoxanthin	C40 isoprenoids	positive	0	0	0	1	0	0	0	1	0	0	0	0
Delphinidin 3-O-beta-D-glucoside	Flavonoid glycosides	positive	0	0	1	1	0	0	0	1	0	0	0	0
Delphinine	C20 isoprenoids	positive	0	0	1	1	0	0	0	0	0	0	0	0
Deserpidine	Yohimbine alkaloids	negative	0	0	1	0	0	0	0	0	0	0	0	0
Devazepide	Amino acids	positive	0	0	1	1	0	0	0	0	0	0	0	0
Dexylosylpradimicin C	Tetracenequinones	negative	0	0	0	1	0	0	0	0	0	0	0	0
DG(11:0_22:6)	DAG	positive	0	0	0	1	0	0	0	0	0	0	0	0
DG(14:1_33:0)	DAG	positive	0	0	1	0	0	0	0	0	0	0	0	0
DG(36:6)	DAG	positive	0	0	0	1	0	0	0	0	0	0	0	0
DG(42:11)	DAG	negative	0	0	0	0	0	0	0	0	0	0	0	0
DG(O-14:0_21:0)	O-DAG	positive	0	0	0	0	0	0	0	0	0	0	0	0
DG(O-22:1_39:0)	O-DAG	positive	0	0	1	1	0	0	0	0	0	0	0	0
DG(O-60:3)	O-DAG	positive	0	0	1	1	0	0	0	0	0	0	0	0
DGDG(11:0_20:3)	DGDG	positive	0	0	0	0	0	1	1	0	0	0	0	0
DGDG(17:1_22:6)	DGDG	positive	0	0	1	1	0	0	0	0	0	0	0	0
DGDG(17:2_22:6)	DGDG	positive	0	0	1	1	0	0	0	0	0	0	0	0
Diacerin	Anthracenecarboxylic acids	negative	0	0	1	1	0	0	0	0	0	0	0	0
Diethyldithiophosphate	Dithiophosphate O-esters	positive	0	0	0	0	0	0	0	0	0	1	0	0
Digitalin	Cardanolides	negative	1	0	0	1	0	0	0	0	0	0	0	0
Digitoxigenin	Cardanolides	positive	0	0	1	0	0	0	0	0	0	0	0	0
Dimethylnonanoyl-CoA	Acyl CoAs	positive	0	0	1	0	0	0	0	0	0	0	0	0
D-Nopaline	Amino acids	positive	0	0	0	0	0	0	0	0	0	0	0	0
Dodecapentaenoic acid	Unsaturated FA	positive	0	0	0	1	0	0	0	0	0	0	0	0
Doxycycline	Linear tetracyclines	positive	0	0	0	0	0	0	0	0	0	0	0	1
D-Prephenyl lactate	Tricarboxylic acids	positive	0	0	0	0	0	1	0	0	0	0	0	0
D-Tryptophan	Amino acids	positive	0	0	1	1	0	0	0	0	0	0	0	0
Epicatechin 3-O-beta-D-glucoside	Flavans, Flavanols and Leucoanthocyanidins	positive	0	0	0	1	0	0	0	0	0	0	0	0
Epsilon-rhodomycinone	Tetracenequinones	negative	0	0	1	1	0	0	0	0	0	0	0	0
Esmeraldin B	Amines	negative	0	0	1	1	0	0	1	1	0	0	0	0
Etoposide	Lignan lactones	negative	0	0	0	0	0	0	0	0	0	0	0	0
Eupatolitin	Flavones and Flavonols	positive	0	0	1	0	0	0	0	0	0	0	0	0
Exserohilone	Indoles	negative	1	0	1	1	0	0	0	1	1	0	1	0
Fenthion	Thiophosphoric acid esters	negative	0	0	0	1	0	0	0	0	0	0	0	0
Flumethasone	C21 steroids	positive	0	0	0	1	0	0	0	0	0	0	0	0
Fluorodifen	Diphenylethers	negative	0	0	0	0	0	0	0	0	0	1	0	0
Folic acid	Folic acids	positive	0	0	1	1	0	0	0	0	0	0	0	0
Fosfomycin	Organic phosphonic acids	positive	0	0	1	0	0	0	0	0	0	0	0	0
Fosinopril	Amino acids	negative	0	0	1	1	0	0	0	0	0	0	0	0
Fraxin	Coumarin glycosides	positive	0	0	1	0	0	0	0	0	0	0	0	0
Fumonisin C2	Sphingoid base analogs	positive	0	0	1	1	0	0	0	0	0	1	0	0
Fumonisin C4	Sphingoid base analogs	negative	0	0	1	0	0	0	0	0	0	0	0	0
Galactosyl-N-acetyllactosamine	Organooxygen compounds	positive	0	0	1	1	0	0	0	0	0	0	0	0
GalCer(d14:2/28:0)	HexCer	negative	0	0	0	0	0	0	0	0	0	1	0	0
GalCer(d17:2/39:0)	HexCer	negative	0	0	0	0	0	1	0	0	0	0	0	0
GalCer(d20:2/39:0)	HexCer	negative	0	0	1	0	0	0	0	0	0	0	0	0
Gambiriin C	Proanthocyanidins	negative	0	0	0	0	0	0	0	0	0	0	0	1
Gambogic acid	1-benzopyrans	negative	0	0	1	1	0	0	0	0	0	0	0	0
Gentiopicrin	C10 isoprenoids	negative	1	0	1	0	0	0	0	0	0	0	0	0
Glisoxepide	Benzenesulfonamides	positive	0	0	1	1	0	0	0	0	0	0	0	0
Gln-Gln-Trp	Tripeptides	negative	0	0	1	1	0	0	0	0	0	0	0	0
Gln-His-Thr	Tripeptides	positive	0	0	0	0	0	0	0	0	0	0	0	0
Glu-Glu-Tyr	Tripeptides	positive	0	0	1	1	0	0	0	0	0	0	0	0
Glu-Ile-Phe	Tripeptides	positive	0	0	1	1	0	0	0	0	0	0	0	0
Glu-Phe-Phe	Tripeptides	positive	0	0	0	0	0	0	0	0	0	0	0	0
Glyburide	Benzenesulfonyl compounds	positive	0	0	0	0	0	1	0	0	0	0	0	0
Gly-Phe-Trp	Tripeptides	negative	0	0	0	0	1	0	0	0	0	0	0	0
Gossypetin 8-glucoside-3-sulfate	Flavones and Flavonols	positive	0	0	0	0	0	0	0	0	0	0	0	0
Gossypin	Flavonoid glycosides	negative	1	0	0	0	0	0	0	0	0	0	0	0
Granaticin	Anthraquinones	positive	0	0	1	1	0	0	0	0	0	0	0	0
Grepafloxacin glucuronide	Organooxygen compounds	positive	0	0	0	0	0	0	0	0	0	1	0	0
Griseorhodin A	Naphthalenes	negative	0	0	1	1	0	0	0	0	0	0	0	0
Gyrocarpine	Lignans	positive	0	0	1	1	0	0	0	0	0	0	0	0
Haematoxylin	Neoflavonoids	positive	0	0	0	0	1	1	0	0	0	0	0	0
Haemocorin	Phenylnaphthalenes	negative	0	0	1	1	0	0	0	0	0	0	0	0
Haplanthin	Flavanones	negative	0	0	1	0	0	0	0	0	0	0	0	0
Hellicoside	Coumaric acids	positive	0	0	1	1	0	0	0	0	0	0	0	0
Heme	Metalloporphyrins	negative	0	0	1	1	0	0	0	0	0	0	0	0
Hentriacontan-16-one	Oxygenated hydrocarbons	positive	0	0	0	0	0	0	0	0	0	0	0	0
Heptyl 4-hydroxybenzoate	p-Hydroxybenzoic acid alkyl esters	positive	0	0	0	1	0	0	0	1	0	0	0	0
Hex2Cer(d14:1/12:0(OH))	LacCer	positive	0	0	0	0	0	0	0	0	0	0	0	0
Hex2Cer(d14:2/18:1(OH))	LacCer	positive	0	0	0	0	0	0	0	0	0	0	0	0
Hex2Cer(d15:2/26:2)	LacCer	positive	0	0	1	0	0	0	0	0	0	0	0	0
Hexachlorobenzene	Chlorobenzenes	positive	0	0	1	0	0	0	0	0	0	0	0	0
Homocystine	Amino acids	negative	0	0	0	0	0	1	0	0	0	0	0	0
Hydroxyheneicosahexaenoic acid	Hydroxy FA	positive	0	0	1	1	0	0	0	0	0	0	0	0
Hydroxytridecadienoic acid	Hydroxy FA	positive	0	0	0	0	0	0	0	0	0	0	0	0
Hydroxytritriacontapentaenoic acid	Hydroxy FA	negative	0	0	0	0	0	0	0	0	0	0	0	0
IACI	Cinchona alkaloids	negative	0	0	0	0	0	1	1	0	0	0	0	0
Ile-Pro-Val	Tripeptides	negative	0	0	0	0	0	0	0	0	0	0	0	1
IMP	Purine ribonucleoside monophosphates	positive	0	0	1	0	0	0	0	0	0	0	0	0
Indoleacrylic acid	Indoles	positive	0	0	1	1	0	0	0	0	0	0	0	0
Inodxyl glucuronide	O-glucuronides	positive	0	0	0	1	0	0	0	0	0	0	0	0
Iodoquinol	Haloquinolines	positive	0	0	0	1	0	0	0	1	0	0	0	0
Isobutrin	Flavonoid glycosides	negative	0	0	0	0	0	1	0	0	0	0	0	0
Isopropyl beta-D-thiogalactoside	Thioglycosides	positive	0	0	0	1	0	0	0	0	0	0	0	0
Isopropylmaleate	Dicarboxylic acids	positive	0	0	0	0	0	0	0	0	1	0	0	1
Isoscoparin	Flavonoid glycosides	negative	0	0	1	0	0	0	0	0	0	0	0	0
Jatrophatrione	C20 isoprenoids	positive	0	0	0	1	0	0	0	1	0	0	0	0
Joro spider toxin	Amino acids	negative	0	0	1	1	0	0	0	0	0	0	0	0
Kaempferol 3-sophorotrioside	Flavonoid glycosides	negative	0	0	1	0	0	0	0	0	0	0	0	0
Ketoprofen glucuronide	Benzophenones	positive	0	0	1	1	0	0	0	0	0	0	0	0
Kievitone hydrate	Prenylated isoflavanones	positive	0	0	0	1	0	0	0	0	0	0	0	0
Kinamycin D	Naphthols	negative	0	0	1	0	0	0	0	0	0	1	0	0
Lactodifucotetraose	Oligosaccharides	negative	0	0	1	0	0	0	0	0	0	0	0	0
Lanceotoxin A	Bufanolides	negative	0	0	1	1	0	0	0	0	0	0	0	0
Lancerin	1-benzopyrans	positive	0	0	0	0	0	0	0	0	0	0	0	0
Lasiodine A	Amino acids	positive	0	0	1	1	0	0	0	0	0	0	0	0
Latamoxef	Amino acids	negative	0	0	0	1	0	0	0	0	0	0	0	0
Leflunomide	N-arylamides	positive	0	0	1	1	0	0	0	0	0	0	0	0
Leucomycin a5	Macrolides	negative	0	0	1	0	0	0	0	0	0	0	0	0
Linoleoyl-CoA	Acyl CoAs	negative	0	0	0	0	0	0	0	0	0	0	0	0
LPA(22:5)	LPA	negative	0	0	0	0	1	1	0	0	0	0	0	0
LPA(24:4)	LPA	positive	0	0	1	0	0	0	0	0	0	0	0	0
LPA(24:5)	LPA	negative	0	0	0	0	1	1	0	0	0	0	0	0
LPC(0:0/18:2)	LPC	positive	0	0	0	1	0	0	0	0	0	0	0	0
LPC(13:0)	LPC	positive	0	0	1	1	0	0	0	0	0	0	0	0
LPC(18:3(6Z,9Z,12Z))	LPC	positive	0	0	1	1	0	0	0	0	0	0	0	0
LPC(18:4)	LPC	positive	0	0	0	0	0	0	0	0	0	0	0	0
LPC(20:5)	LPC	positive	0	0	0	1	0	0	0	0	0	0	0	0
LPC(24:4)	LPC	positive	0	0	0	1	0	0	0	1	0	0	0	0
LPE(18:3)	LPE	negative	0	0	1	1	0	0	0	0	0	0	0	0
LPE(24:5)	LPE	positive	0	0	0	0	0	0	0	0	0	1	0	0
LPG(20:2)	LPG	positive	0	0	1	0	0	0	0	0	0	0	0	0
LPG(22:2)	LPG	negative	0	0	1	1	0	0	0	0	0	0	0	0
LPG(22:4)	LPG	negative	0	0	1	1	0	0	0	0	0	0	0	0
LPG(26:5)	LPG	positive	0	0	0	1	0	0	0	1	0	0	0	0
LPG(P-16:1)/LPG(O-16:2)	O-LPG	positive	0	0	0	1	0	0	0	1	0	0	0	0
LPG(P-18:0)/LPG(O-18:1)	O-LPG	positive	0	0	0	0	0	0	0	0	0	0	0	0
LPGP(16:0)	LPGP	positive	0	0	0	0	0	0	0	0	0	0	0	0
LPGP(17:2)	LPGP	positive	0	0	1	1	0	0	0	0	0	0	0	0
LPGP(19:0)	LPGP	positive	0	0	1	1	0	0	0	0	0	0	0	0
LPGP(24:0)	LPGP	positive	0	0	1	1	0	0	0	0	0	0	0	0
LPGP(26:2)	LPGP	negative	0	0	1	1	0	0	0	0	0	0	0	0
LPI(12:0)	LPI	negative	0	0	1	1	0	0	0	0	0	0	0	0
LPI(18:2)	LPI	negative	0	0	1	0	0	0	0	0	0	0	0	0
LPI(18:3)	LPI	negative	0	0	1	1	0	0	0	0	0	0	0	0
LPI(P-16:0)/LPI(O-16:1)	O-LPI	negative	0	0	1	1	0	0	0	0	0	0	0	0
LPIP(18:1)	LPIP	negative	0	0	0	1	0	0	0	0	0	0	0	0
LPIP(18:4)	LPIP	negative	0	0	0	0	0	0	1	0	0	0	0	0
LPIP(19:0)	LPIP	positive	0	0	1	0	0	0	0	0	0	0	0	0
LPIP(20:1)	LPIP	positive	0	0	0	1	0	0	0	0	0	0	0	0
LPIP(22:1)	LPIP	negative	0	0	1	1	0	0	0	0	0	0	0	0
LPIP(25:0)	LPIP	negative	0	0	0	0	0	0	0	0	0	0	0	0
LPIP(26:1)	LPIP	negative	0	0	1	1	0	0	0	0	0	0	0	0
LPIP(28:0)	LPIP	negative	0	0	0	0	0	0	0	0	0	0	0	0
LPIP(O-16:0)	O-LPIP	positive	0	0	1	1	0	0	0	0	0	0	0	0
LPIP(O-20:1)	O-LPIP	positive	0	0	0	0	0	0	0	0	0	0	0	0
LPIP(O-22:0)	O-LPIP	negative	0	0	1	1	0	0	0	0	0	0	0	0
LPIP2(11:0)	LPIP2	positive	0	0	0	0	1	0	0	0	0	0	0	0
LPIP2(14:1)	LPIP2	positive	0	0	0	1	0	0	0	0	0	0	0	0
LPIP2(16:1)	LPIP2	positive	0	0	0	0	0	0	0	0	0	0	0	0
LPIP2(17:1)	LPIP2	positive	0	0	1	0	0	0	0	0	0	0	0	0
LPIP2(17:2)	LPIP2	positive	0	0	1	0	0	0	0	0	0	0	0	0
LPIP2(18:1)	LPIP2	positive	0	0	1	0	0	0	0	0	0	0	0	0
LPIP2(18:2)	LPIP2	positive	0	0	0	1	0	0	0	1	0	0	0	0
LPIP2(18:3)	LPIP2	negative	0	0	1	0	0	0	0	0	0	0	0	0
LPIP2(20:1)	LPIP2	positive	0	0	1	0	0	0	0	0	0	0	0	0
LPIP2(20:2)	LPIP2	positive	0	0	1	0	0	0	0	0	0	0	0	0
LPIP2(20:3)	LPIP2	positive	0	0	0	0	0	0	0	0	0	0	0	0
LPIP2(20:4)	LPIP2	positive	0	0	1	1	0	0	0	0	0	0	0	0
LPIP2(20:5)	LPIP2	positive	0	0	1	0	0	0	0	0	0	0	0	0
LPIP2(21:0)	LPIP2	positive	0	0	1	1	0	0	0	0	0	0	0	0
LPIP2(22:0)	LPIP2	negative	0	0	1	1	0	0	0	0	0	0	0	0
LPIP2(22:1)	LPIP1	negative	0	0	0	1	0	0	0	0	0	0	0	0
LPIP2(23:0)	LPIP2	positive	0	0	0	1	0	0	0	0	0	0	0	0
LPIP2(24:0)	LPIP2	positive	0	0	0	1	0	0	0	0	0	0	0	0
LPIP2(24:4)	LPIP2	positive	0	0	0	1	0	0	0	0	0	0	0	0
LPIP2(26:1)	LPIP2	positive	0	0	0	1	0	0	0	0	0	0	0	0
LPIP2(34:0)	LPIP2	negative	0	0	0	0	0	0	0	0	0	0	0	0
LPIP2(O-18:0)	LPIP2	negative	0	0	0	1	0	0	0	0	0	0	0	0
LPIP2(P-22:1)	LPIP2	negative	0	0	0	1	0	0	0	0	0	0	0	0
LPIP3(11:0)	LPIP3	positive	0	0	0	0	0	0	0	0	0	0	0	1
LPIP3(12:0)	LPIP3	positive	0	0	1	0	0	0	0	0	0	0	0	0
LPIP3(16:0)	LPIP3	negative	0	0	1	1	0	0	0	0	0	0	0	0
LPIP3(16:1)	LPIP3	negative	0	0	0	0	0	0	0	0	0	0	0	0
LPIP3(19:0)	LPIP3	negative	0	0	1	0	0	0	0	0	0	0	0	0
LPIP3(20:1)	LPIP3	negative	0	0	0	1	0	0	0	0	0	0	0	0
LPIP3(20:4)	LPIP3	negative	0	0	1	1	0	0	0	0	0	0	0	0
LPIP3(24:4)	LPIP3	negative	0	0	0	0	0	0	0	0	0	0	1	0
LPIP3(26:0)	LPIP3	negative	0	0	1	0	0	0	0	0	0	0	0	0
LPIP3(27:0)	LPIP3	negative	0	0	0	1	0	0	0	0	0	0	0	0
LPIP3(34:0)	LPIP3	negative	0	0	0	0	0	0	0	0	0	0	0	0
LPIP3(O-14:0)	LPIP3	negative	0	0	1	0	0	0	0	0	0	0	0	0
LPIP3(O-16:1)	LPIP3	negative	0	0	1	1	0	0	0	1	0	0	0	0
LPIP3(O-18:0)	LPIP3	negative	0	0	0	0	0	0	0	0	0	0	0	0
LPIP3(O-20:0)	LPIP3	negative	0	0	0	0	0	0	0	0	0	0	0	0
LPIP3(P-14:0)	LPIP3	negative	0	0	0	0	0	0	0	0	0	0	0	0
LPS(15:1)	LPS	positive	0	0	1	1	0	0	0	0	0	0	0	0
LPS(16:0)	LPS	positive	0	0	1	0	0	0	0	0	0	0	0	0
LPS(24:4)	LPS	positive	0	0	0	1	0	0	0	0	0	0	0	0
LPS(24:6)	LPS	negative	0	0	0	0	0	1	0	0	0	0	0	0
LPS(26:5)	LPS	negative	0	0	1	0	0	0	0	0	0	0	0	0
Luteolin 7-O-(6''-malonylglucoside)	Flavones and Flavonols	negative	0	0	0	1	0	0	0	0	0	0	0	0
Lys-Lys-Thr	Tripeptides	positive	0	0	1	0	0	0	0	0	0	0	0	0
Mahuannin D	Proanthocyanidins	negative	1	0	1	1	0	0	0	0	0	0	0	0
Malonylapiin	Flavonoid glycosides	negative	0	0	0	0	0	0	0	0	0	0	0	0
Maltopentaose	Organooxygen compounds	negative	0	0	0	1	0	0	0	0	0	0	0	0
Mannitol 1-phosphate	Monosaccharide phosphates	positive	0	0	1	1	0	0	1	1	0	0	0	0
MCOCH	Cyclohexane dicarboxylic acids	negative	0	0	0	0	0	0	0	0	0	0	0	0
MET-enkephalin	Amino acids	negative	0	0	1	1	0	0	0	0	0	0	0	0
methyl 9-hydroperoxy-10,12,13,15-bisepidioxy-16E-octadecenoate	Hydroperoxy FA	negative	0	0	1	0	0	0	0	0	0	0	0	0
Metoprolol	Tyrosols	positive	0	0	0	0	0	0	0	0	0	1	0	0
MG(0:0/18:0/0:0)	MAG	positive	0	0	0	0	0	0	0	0	0	0	0	0
MG(18:3)	MAG	positive	0	0	1	0	0	0	0	0	0	0	0	0
MGDG(11:0_20:5)	MGDG	positive	0	0	0	1	0	0	0	0	0	0	0	0
MGDG(18:4_18:4)	MGDG	positive	0	1	0	0	0	0	0	0	0	0	0	0
Moclobemide	4-halobenzoic acids	positive	0	0	1	1	0	0	0	0	0	0	0	0
Mucronine A	Amino acids	negative	0	0	0	1	0	0	0	0	0	0	0	0
Mycothione	Organooxygen compounds	negative	0	0	1	1	0	0	0	1	0	0	0	0
Myricetin 3-glucuronide	Flavones and Flavonols	negative	1	0	1	0	0	0	0	0	0	0	0	0
N(6)-(Dimethylallyl)adenosine 5'-diphosphate	Purine ribonucleotides	positive	0	0	1	0	0	0	0	0	0	0	0	0
N4-Acetylsulfapyridine	Benzenesulfonyl compounds	positive	0	0	1	1	0	0	0	0	0	0	0	0
N6-Carbamoyl-L-threonyladenosine	Purine deoxyribonucleosides	positive	0	0	1	0	0	0	0	0	0	0	0	0
N-Acetylmuramic acid 6-phosphate	Acylaminosugars	positive	0	0	0	0	0	0	0	0	0	0	0	0
NADPH	Nicotinamide dinucleotides	positive	0	0	1	0	0	0	0	0	0	0	0	0
N-Allyladenosine	Purines	positive	0	0	1	0	0	0	0	0	0	0	0	0
Nandrolone phenpropionate	C18 steroids	positive	0	0	0	1	0	0	0	1	0	0	0	0
Naringenin	Flavanones	positive	0	0	0	0	0	0	0	0	0	0	0	0
Neocarzinostatin chromophore	Organooxygen compounds	negative	0	0	0	0	0	0	0	0	0	0	0	0
Neostigmine bromide	Benzenes	positive	0	0	0	1	0	0	0	1	0	0	0	0
Nervonic acid	Unsaturated FA	positive	0	0	1	1	0	0	0	0	0	0	0	0
N-Glycoloylneuraminate	Organooxygen compounds	negative	0	0	0	1	0	0	0	0	0	0	0	0
Nitrazepam	1,4-benzodiazepines	positive	0	0	1	0	0	0	0	0	0	0	0	0
N-Methylethanolamine phosphate	Phosphate esters	positive	0	0	1	0	0	0	0	0	0	0	0	0
N-Methyl-N'-nitro-N-nitrosoguanidine	Nitramines	positive	0	0	1	0	0	0	0	0	0	0	0	0
Nonadecanoyl-CoA	Acyl CoAs	negative	0	0	1	1	0	0	0	0	0	0	0	0
N-Succinyl-2-amino-6-ketopimelate	Amino acids	positive	0	0	1	0	0	1	0	0	0	0	0	0
Olivacine	Carbazoles	positive	0	0	0	0	0	0	0	0	0	0	0	0
Orotidine	Glycosylamines	positive	0	0	0	0	1	0	0	0	0	0	0	0
Ostruthin	Terpene lactones	negative	0	0	0	0	0	0	0	0	0	0	0	1
Oxidized glutathione	Peptides	positive	0	0	1	1	0	0	0	0	0	0	0	0
PA(10:0_19:0)	PA	negative	0	0	1	0	0	0	0	0	0	0	0	0
PA(10:0_22:5)	PA	positive	0	0	0	0	0	1	0	0	0	0	0	0
PA(11:0_18:4)	PA	positive	0	0	0	0	0	0	0	0	0	0	0	0
PA(13:0_24:4)	PA	positive	0	0	0	0	0	0	0	0	0	0	0	0
PA(15:0_22:5)	PA	negative	0	0	0	1	0	0	0	0	0	0	0	0
PA(15:0_22:6)	PA	negative	0	0	0	1	0	0	0	0	0	0	0	0
PA(15:0_24:4)	PA	positive	0	0	0	1	0	0	0	0	0	0	0	0
PA(15:1_20:2)	PA	negative	1	0	0	1	0	0	0	0	0	0	0	0
PA(16:1/4:1)	PA	positive	0	0	0	0	0	0	0	0	0	0	0	0
PA(17:0/4:1)	PA	positive	0	0	1	1	0	0	0	0	0	0	0	0
PA(17:0_20:4)	PA	negative	0	0	0	0	0	0	0	0	0	0	0	0
PA(17:1/4:1)	PA	negative	0	0	0	1	0	0	0	0	0	0	0	0
PA(18:3_22:6)	PA	positive	0	0	0	0	0	0	0	0	0	0	0	0
PA(18:4_22:6)	PA	negative	0	0	0	0	0	0	0	0	0	0	0	0
PA(O-20:0/4:1)	O-PA	positive	0	0	0	0	0	0	0	0	0	0	0	0
Patuletin 3-(6''-(E)-feruloylglucoside)	Flavones and Flavonols	negative	0	0	1	0	0	0	0	0	0	0	0	0
PC(11:0_20:2)	PC	positive	0	0	0	1	0	0	0	0	0	0	0	0
PC(11:0_22:5)	PC	positive	0	0	0	1	0	0	0	0	0	0	0	0
PC(11:0_22:6)	PC	negative	0	0	0	0	0	0	0	0	0	0	1	0
PC(16:1/4:1)	PC	negative	0	0	1	1	0	0	0	0	0	0	0	0
PC(20:5_34:0)	PC	negative	0	0	0	1	0	0	0	0	0	0	0	0
PC(22:4/4:1)	PC	positive	0	0	0	0	0	1	0	0	0	0	0	0
PC(O-16:0/38:0)	O-PC	negative	0	0	0	1	0	0	0	0	0	0	0	0
PC(P-17:0/20:4)/PC(O-17:1/20:4)	O-PC	positive	0	0	1	0	0	0	0	0	0	0	0	0
PE(14:0_22:5)	PE	positive	0	0	0	1	0	0	0	0	0	0	0	0
PE(14:1_22:6)	PE	positive	0	0	0	0	0	0	0	0	0	0	0	0
PE(32:3)	PE	negative	1	0	0	1	0	0	0	0	0	0	0	0
PE(34:5)	PE	negative	1	0	0	1	0	0	0	0	0	0	0	0
PE(O-14:0/2:0)	O-PE	negative	0	0	1	1	0	0	0	0	0	0	0	0
PE(P-18:1/22:4)/PE(O-18:2/22:4)	O-PE	positive	0	0	1	0	0	0	0	0	0	0	0	0
Pelargonidin 3-O-(6-O-malonyl-beta-D-glucoside)	Flavonoid glycosides	negative	0	0	1	1	0	0	0	0	0	0	0	0
Pentobarbital	Pyrimidones	positive	0	0	0	0	0	0	0	0	0	0	0	0
Peonidin	Anthocyanidins	positive	0	0	0	1	0	0	0	0	0	0	0	0
PG(10:0/4:0)	PG	negative	0	0	0	0	1	1	0	0	0	0	0	0
PG(10:0_16:0)	PG	positive	0	0	0	0	0	0	0	0	0	0	0	0
PG(10:0_18:4)	PG	positive	0	0	1	1	0	0	0	0	0	0	0	0
PG(11:0/4:1)	PG	positive	0	0	1	1	0	0	0	0	0	0	0	0
PG(11:0_20:1)	PG	positive	0	0	0	1	0	0	0	0	0	0	0	0
PG(14:1/4:1)	PG	negative	0	0	1	0	0	0	0	0	0	0	0	0
PG(O-18:0/4:1)	O-PG	negative	0	0	1	1	0	0	0	0	0	0	0	0
PG(P-16:1/10:0)/PG(O-16:2/10:0)	O-PG	negative	0	0	0	0	0	0	0	0	0	0	0	1
PG(P-18:1/4:1)/PG(O-18:2/4:1)	O-PG	negative	0	0	1	1	0	0	0	0	0	0	0	0
Phellamurin	Flavonoid glycosides	negative	0	0	1	0	0	0	0	0	0	0	0	0
Phenamil	Pyrazinecarboxamides	positive	0	0	0	1	0	0	0	0	0	0	0	0
Phenolphthalin	Benzoic acids	positive	0	0	1	0	0	0	0	0	0	0	0	0
Phe-Thr-Thr	Tripeptides	positive	0	0	0	0	0	0	0	0	0	0	0	0
Phe-Trp-Trp	Tripeptides	positive	0	0	1	0	0	0	0	0	0	0	0	0
Phlorizin	Flavonoid glycosides	negative	0	0	0	1	0	0	0	0	0	0	0	0
PI(10:0_11:0)	PI	positive	0	0	0	1	0	0	0	0	0	0	0	0
PI(10:0_12:0)	PI	negative	0	0	1	0	0	0	0	0	0	0	0	0
PI(10:0_14:0)	PI	positive	0	0	1	1	0	0	0	0	0	0	0	0
PI(10:0_16:1)	PI	negative	0	0	1	1	0	0	0	0	0	0	0	0
PI(10:0_17:1)	PI	negative	0	0	0	1	0	0	0	0	0	0	0	0
PI(10:0_18:3)	PI	positive	0	0	0	0	0	0	0	0	0	0	0	0
PI(10:0_20:3)	PI	negative	0	0	1	0	0	0	0	0	0	0	0	0
PI(11:0/4:0)	PI	negative	0	0	1	1	0	0	0	0	0	0	0	0
PI(11:0/4:1)	PI	negative	0	0	1	1	0	0	0	0	0	0	0	0
PI(13:0/4:1)	PI	positive	0	0	1	1	0	0	0	0	0	0	0	0
PI(14:0_22:5)	PI	negative	0	0	0	1	0	0	0	0	0	0	0	1
PI(14:0_24:4)	PI	positive	0	0	0	0	0	0	0	0	0	0	0	0
PI(14:1/4:1)	PI	positive	0	0	1	1	0	0	0	0	0	0	0	0
PI(15:0/4:1)	PI	negative	0	0	1	0	0	0	0	0	0	0	0	0
PI(15:0_24:4)	PI	negative	0	0	0	0	0	0	0	0	0	0	0	0
PI(16:1/4:1)	PI	positive	0	0	1	1	0	0	0	0	0	0	0	0
PI(16:1_26:2)	PI	positive	0	0	1	0	0	0	0	0	0	0	0	0
PI(17:0/4:1)	PI	positive	0	0	0	1	0	0	0	0	0	0	0	0
PI(17:1_22:6)	PI	positive	0	0	1	0	0	0	0	0	0	0	0	0
PI(18:1_24:4)	PI	positive	0	0	1	1	0	0	0	0	0	0	0	0
PI(18:3_22:6)	PI	positive	0	0	0	0	0	0	0	0	0	0	0	0
PI(18:3_24:4)	PI	negative	0	0	1	0	1	0	0	0	0	0	0	0
PI(18:3_30:0)	PI	negative	0	0	0	0	0	0	0	0	0	0	0	0
PI(20:3_22:6)	PI	negative	0	0	0	0	0	0	0	0	0	0	0	0
PI(26:0)	PI	negative	0	0	1	0	0	0	0	0	0	0	0	0
PI(42:8)	PI	positive	0	0	0	0	0	0	0	0	0	0	0	0
PI(44:10)	PI	positive	0	0	0	1	0	0	0	0	0	0	0	0
PI(50:9)	PI	negative	0	0	1	1	0	0	0	0	0	0	0	0
PI(O-14:0/24:4)	O-PI	positive	0	0	0	0	0	0	1	0	0	0	0	0
PI(P-16:0/20:5)/PI(O-16:1/20:5)	O-PI	positive	0	0	0	1	0	0	0	1	0	0	0	0
Piceid	Diphenyl ethers, biphenyls, dibenzyls and stilbenes	negative	0	0	0	0	0	0	0	0	0	0	0	0
PI-Cer(d14:0/11:0)	PI-Cer	positive	0	0	0	0	0	0	0	0	0	0	0	0
PI-Cer(d14:0/17:1)	PI-Cer	positive	0	0	0	1	0	0	0	0	0	0	0	0
PI-Cer(d14:0/20:4)	PI-Cer	negative	0	0	1	0	0	0	0	0	0	0	0	0
PI-Cer(d14:0/22:6)	PI-Cer	negative	0	0	1	1	0	0	0	0	0	0	0	0
PI-Cer(d14:1/14:1)	PI-Cer	positive	0	0	1	1	0	0	0	0	0	0	0	0
PI-Cer(d14:1/18:4)	PI-Cer	positive	0	0	0	0	0	0	0	0	0	0	0	0
PI-Cer(d14:1/22:6)	PI-Cer	negative	0	0	1	0	0	0	0	0	0	0	0	0
PI-Cer(d14:2/13:0(OH))	PI-Cer	positive	0	0	0	0	0	0	1	0	0	0	0	0
PI-Cer(d15:1/20:5)	PI-Cer	positive	0	0	1	1	0	0	0	0	0	0	0	0
PI-Cer(d15:2/20:5)	PI-Cer	positive	0	0	0	0	0	0	0	0	0	0	0	0
PI-Cer(d15:2/26:2)	PI-Cer	positive	0	0	0	1	0	0	0	0	0	0	0	0
Picrotin	Furopyrans	negative	1	0	1	0	0	0	0	0	0	0	0	0
Plantamajoside	Hydroxycinnamic acids	negative	0	0	1	1	0	0	0	0	0	0	0	0
Podophyllotoxone	Aryltetralin lignans	positive	0	0	1	1	0	0	0	0	0	0	0	0
Polypodine B	Cholesterols	positive	0	0	1	1	0	0	0	0	0	0	0	0
Precorrin-1	Tetrapyrroles	negative	0	0	0	1	0	0	0	0	0	0	0	0
Premithramycin A2'	Naphthols	negative	0	0	1	1	0	0	0	0	0	0	0	0
Premithramycin A3	Naphthols	positive	0	0	1	1	0	0	0	0	0	0	0	0
Premithramycin A3'	Naphthols	negative	0	0	1	0	0	0	0	0	0	0	0	0
Primary fluorescent chlorophyll catabolite	Tetrapyrroles	positive	0	0	1	1	0	0	0	0	0	0	0	0
Procyanidin B1	Proanthocyanidins	negative	0	0	1	1	0	0	0	0	0	0	0	0
Prontosil	Azobenzenes	positive	0	0	1	1	0	0	0	0	0	0	0	0
Pro-Ser-Trp	Tripeptides	positive	0	0	0	0	0	0	0	0	0	0	0	0
Protoaphin aglucone	Arylnaphthalene lignans	negative	0	0	0	1	0	0	0	1	0	0	0	0
Protorifamycin I	Macrolactams	positive	0	0	1	1	0	0	0	0	0	0	0	0
PS(10:0_16:1)	PS	positive	0	0	1	0	0	0	0	0	0	0	0	0
PS(10:0_18:1)	PS	positive	0	0	1	1	0	0	0	0	0	0	0	0
PS(10:0_18:4)	PS	negative	0	0	0	1	0	0	0	0	0	0	0	0
PS(10:0_22:5)	PS	negative	0	0	0	0	0	0	0	0	0	0	0	0
PS(13:0/4:0)	PS	positive	0	0	0	0	0	0	0	0	0	0	0	0
PS(14:0/4:0)	PS	positive	0	0	0	1	0	0	0	0	0	0	0	0
PS(14:0/4:1)	PS	positive	0	0	1	0	0	0	0	0	0	0	0	0
PS(14:1_18:3)	PS	negative	0	0	1	0	0	0	0	0	0	0	0	0
PS(15:0_22:2)	PS	negative	0	0	1	1	0	0	0	0	0	0	0	0
PS(15:1_22:6)	PS	negative	0	0	1	1	0	0	0	0	0	0	0	0
PS(16:0/4:1)	PS	positive	0	0	0	0	0	0	0	0	0	0	0	0
PS(17:1_22:6)	PS	negative	0	0	1	0	0	0	0	0	0	0	0	0
PS(17:2_22:1)	PS	negative	0	0	0	0	0	0	0	0	0	1	0	0
PS(17:2_22:6)	PS	negative	0	0	1	1	0	0	0	0	0	0	0	0
PS(18:1_22:6)	PS	positive	0	0	0	1	0	0	0	0	0	0	0	0
PS(18:2/4:1)	PS	positive	0	0	0	1	0	0	0	0	0	0	0	0
PS(18:3_22:6)	PS	positive	0	0	0	0	0	0	0	0	0	0	0	0
PS(20:2/4:1)	PS	negative	0	0	1	0	0	0	0	0	0	0	0	0
PS(20:3_22:6)	PS	negative	0	0	0	1	0	0	0	0	0	0	0	0
PS(22:4)	PS	positive	0	1	0	0	0	0	0	0	0	0	0	0
PS(22:6/4:1)	PS	negative	0	0	1	1	0	1	0	1	0	0	0	0
PS(32:6)	PS	negative	0	0	1	1	0	0	0	0	0	0	0	0
PS(50:10)	PS	negative	0	0	0	1	0	0	0	0	0	0	0	0
PS(52:8)	PS	positive	0	0	0	0	0	0	0	0	0	0	0	0
PS(O-18:0/38:0)	O-PS	negative	0	0	1	0	0	0	0	0	0	0	0	1
PS(P-18:1/22:6)/PS(O-18:2/22:6)	O-PS	negative	0	0	0	0	0	0	0	0	0	0	0	0
PS(P-20:0/4:1)/PS(O-20:1/4:1)	O-PS	positive	0	0	0	1	0	0	0	0	0	0	0	0
PS(P-34:9)/PS(O-34:10)	O-PS	negative	0	0	0	0	0	0	0	0	0	0	0	1
PS(P-36:8)/PS(O-36:9)	O-PS	positive	0	0	1	0	0	0	0	0	0	0	0	0
PS(P-40:8)/PS(O-40:9)	O-PS	positive	0	0	0	1	0	0	0	0	0	0	0	0
PS(P-44:9)/PS(O-44:10)	O-PS	negative	0	0	0	0	0	0	0	0	0	0	0	0
Pyochelin	Amino acids	positive	0	0	1	0	0	0	0	0	0	0	0	0
Pyrimidine nucleoside	Pyrimidine nucleosides	positive	0	0	1	1	0	0	0	0	0	0	0	0
Quercetin 3-O-malonylglucoside	Flavonoid glycosides	positive	0	0	0	1	0	0	0	0	0	0	0	0
Rifamycin W	Macrolactams	positive	0	0	1	1	0	0	0	0	0	0	0	0
Robustaol A	Diphenylmethanes	positive	0	0	1	0	0	0	0	0	0	0	0	0
Rosiglitazone	Phenol ethers	negative	1	0	1	0	0	0	0	0	0	0	0	0
Rufloxacin	Quinoline carboxylic acids	positive	0	0	1	0	0	0	0	0	0	0	0	0
Rutin	Flavonoid glycosides	negative	0	0	0	1	0	0	0	0	0	0	0	0
S-Adenosylhomocysteine	Glycosylamines	positive	0	0	0	0	0	0	0	0	0	0	0	1
Salicin	O-glycosyl compounds	negative	0	0	0	1	1	1	0	0	0	0	0	0
Sanggenon C	Linear diarylheptanoids	positive	0	0	1	0	0	0	0	0	0	0	0	0
Secologanin	C10 isoprenoids	negative	0	0	0	1	0	0	0	0	0	0	0	0
Septentriodine	C20 isoprenoids	positive	0	0	0	0	0	0	0	0	0	0	0	0
S-Glutathionyl-cysteine	Peptides	negative	0	0	0	1	0	0	0	0	0	0	0	0
Silychristin	2-arylbenzofuran flavonoids	positive	0	0	0	1	0	0	0	0	0	0	0	0
sn-Glycero-3-phosphoglycerol	Organic phosphoric acids	positive	0	0	0	1	0	0	1	1	0	0	0	0
S-Succinylglutathione	Amino acids	positive	0	0	1	0	0	0	0	0	0	0	0	0
Stealthin C	Fluorenes	negative	0	0	0	1	0	0	0	0	0	0	0	0
Streptomycin 6-phosphate	Organooxygen compounds	positive	0	0	1	0	0	0	0	0	0	0	0	0
Styrene	Styrenes	positive	0	0	1	1	0	0	0	0	0	0	0	0
Sulfamonomethoxine	Benzenesulfonyl compounds	positive	0	0	1	0	0	0	0	0	0	0	0	0
Sulfentrazone	Phenyl-1,2,4-triazoles	positive	0	0	0	1	0	0	0	0	0	0	0	0
Taurochenodeoxycholic acid 7-sulfate	C24 bile acids	negative	0	0	1	1	0	1	0	0	0	0	0	0
Taurolithocholic acid 3-glucuronide	C24 bile acids	positive	0	0	1	1	0	0	0	0	0	0	0	0
Taxifolin	Flavanonols	positive	0	0	0	1	0	0	0	1	0	0	0	0
Telithromycin	Organooxygen compounds	negative	0	0	1	1	0	0	0	0	0	0	0	0
Terfenadine	Diphenylmethanes	negative	0	0	0	0	0	0	0	0	0	0	0	0
Tetracenomycin F2	Anthracenes	negative	0	0	0	1	0	0	0	0	0	0	0	0
Tetracosatrienoic acid	Unsaturated FA	positive	0	0	1	0	0	0	0	0	0	0	0	0
Tetrangomycin	Angucyclines	negative	0	0	0	1	0	0	0	0	0	0	0	0
Thalmidine	Lignans	positive	0	0	1	1	0	0	0	0	0	0	0	0
Theaflavin	Hydroxyflavonoids	positive	0	0	0	0	0	0	1	0	0	0	0	0
Thyronine	Diarylethers	negative	0	0	1	0	0	0	0	0	0	0	0	0
trans-Tetradec-2-enoyl-CoA	Acyl CoAs	positive	0	0	1	0	0	0	0	0	0	0	0	0
Trehalose 6-phosphate	Monosaccharide phosphates	negative	0	0	1	0	0	0	1	0	0	0	0	0
Troleandomycin	Macrolides	negative	0	0	1	1	0	0	0	0	0	0	0	0
Trypanothione disulfide	Amino acids	negative	0	0	1	0	0	0	0	0	0	0	0	0
Tubocurarine	Ethers	positive	0	0	1	1	0	0	0	0	0	0	0	0
Tyr-Val	Dipeptides	positive	0	0	1	1	0	0	0	0	0	0	0	0
Ureidoacrylic acid	Vinylogous amides	positive	0	0	1	0	0	0	0	0	0	0	0	0
Uric acid	Xanthines	positive	0	0	0	0	0	0	0	0	0	0	0	0
Uridine 5'-Diphospho-N-acetylgalactosamine	Pyrimidine ribonucleoside diphosphates	positive	0	0	0	1	0	0	0	0	0	0	0	0
Velloquercetin	Flavones and Flavonols	negative	0	0	0	0	0	0	0	0	0	0	0	0
Verbasoside	O-glycosyl compounds	negative	0	0	1	0	0	0	0	0	0	0	0	0
Wybutoxine	Amino acid esters	positive	0	0	0	0	0	0	0	0	0	0	0	0
Yersiniabactin	O-quinomethanes	positive	0	0	1	0	0	0	0	0	0	0	0	0
Zeaxanthin	C40 isoprenoids	positive	0	0	1	0	0	0	0	0	0	0	0	0

## Sheet: mb_mc_y
Supplementary Table S1: Significance of the different mass features over various treatments. The data are shown separately for negative and positive mode. The significantly modified metabolites for each treatment are given on the separate sheets. The raw data is given in the Supplementary Table S5
Name: Putative annotation as shown in Supplementary Table S6
RT min: retention time
m.z: mass-to-charge ratio
VIP score: variable influence on projection
adj p: FDR adjusted P value (significance P< 0.005)
NA: not available
negative
Peak #	Name	Annotation error	Formula	inchi key	Main group	Sub group	Compound Match	RT Min	m.z	VIP score	log2fold change	adj p
Peak_00634	Picrotin	0.0007	C15H18O7	RYEFFICCPKWYML-QCGISDTRSA-N	Furopyrans	Furopyrans	Phytochemical.Oxyaromatic.Compound	3.5	309.098	0.513156	-1.31932	0.0271926
Peak_00998	Gentiopicrin	0.0013	C16H20O9	DUAGQYUORDTXOR-GPQRQXLASA-N	Isoprenoids	C10 isoprenoids	Phytochemical.Oxyaromatic.Compound	3.5	355.104	0.511926	-1.24021	0.0370042
Peak_01008	Rosiglitazone	0.0003	C18H19N3O3S	YASAKCUCGLMORW-OAHLLOKOSA-N	Phenols	Phenol ethers	Protein	3.5	356.107	0.440428	-1.24081	0.0377496
Peak_01974	Exserohilone	0.0099	C20H22N2O6S2	FWPMSYUTOOUASJ-GFIYPFTLSA-N	Indoles	Indoles	Phytochemical.Oxyaromatic.Compound	3.231	449.074	1.10184	1.83415	0.0481072
Peak_02419	Gossypin	0.0066	C21H20O13	SJRXVLUZMMDCNG-KKPQBLLMSA-N	Flavonoids	Flavonoid glycosides	Phytochemical.Oxyaromatic.Compound	3.148	479.089	0.723304	1.12057	0.0449781
Peak_02575	Myricetin 3-glucuronide	0.0013	C21H18O14	MBWOCQLTCWTIJE-ROQVLGAUSA-N	Flavonoids	Flavones and Flavonols	Phytochemical.Oxyaromatic.Compound	3.013	493.063	1.28737	1.90715	0.0422552
Peak_02932	Mahuannin D	0.026035	C30H24O9	BHGCRZWUKWPRDM-TZVIJXGFSA-N	Flavonoids	Proanthocyanidins	Phytochemical.Oxyaromatic.Compound	1.718	527.108	0.629056	1.70324	0.0283365
Peak_04885	PA(15:1_20:2)	0.001992	C38H69O8P		Glycerophosphates	PA	Lipid	6.793	683.467	0.734628	-1.08913	0.0322645
Peak_04909	PE(32:3)	0.0107	C37H68NO8P		Glycerophosphoethanolamines	PE	Lipid	6.843	684.471	0.394421	-1.34631	0.0230826
Peak_05301	PE(34:5)	0.0107	C39H68NO8P		Glycerophosphoethanolamines	PE	Lipid	6.826	708.471	1.00964	-1.36662	0.0260839
Peak_05378	Digitalin	1e-05	C36H56O14	CKNOLMVLQUPVMU-YMMLYESFSA-N	Sterols	Cardanolides	Lipid	4.814	711.359	0.660137	-1.04009	0.0220828
positive
NA
RT: retention time

## Sheet: mb_nb_y
Supplementary Table S1: Significance of the different mass features over various treatments. The data are shown separately for negative and positive mode. The significantly modified metabolites for each treatment are given on the separate sheets. The raw data is given in the Supplementary Table S5
Name: Putative annotation as shown in Supplementary Table S6
RT min: retention time
m.z: mass-to-charge ratio
VIP score: variable influence on projection
adj p: FDR adjusted P value (significance P< 0.005)
negative
Peak #	Name	Annotation error	Formula	inchi key	Main group	Sub group	Compound Match	RT Min	m.z	VIP score	log2fold change	adj p
Peak_00160	Alliin	0.009	C6H11NO3S	XUHLIQGRKRUKPH-ITZCMCNPSA-N	Amino acids and peptides	Amino acids	Protein	0.783	176.029	0.358272	-1.54321	0.000825499
Peak_00456	Fenthion	0.018978	C10H15O3PS2	PNVJTZOFSHSLTO-UHFFFAOYSA-N	Organic thiophosphoric acids	Thiophosphoric acid esters	Lipid	0.699	277.031	0.273854	-1.3327	0.00125677
Peak_00612	Stealthin C	0.0005	C18H13NO4	BNUJIESPRPGZOC-UHFFFAOYSA-N	Fluorenes	Fluorenes	Phytochemical.Oxyaromatic.Compound	0.833	306.077	0.271988	-1.09607	0.0080447
Peak_00630	6-Demethylsterigmatocystin	0.0073	C17H10O6	RQQOEIJLJPCYJR-BWKAKNAASA-N	Aflatoxins and related substances	Aflatoxins and related substances	Phytochemical.Oxyaromatic.Compound	0.766	309.047	0.269203	-2.00829	0.000370732
Peak_00724	Tetrangomycin	0.0021	C19H14O5	UGEKKXLEYACFTD-LJQANCHMSA-N	Angucyclines	Angucyclines	Phytochemical.Oxyaromatic.Compound	2.51	321.074	0.435038	1.41382	0.00484702
Peak_00734	Asp-Cys-Ser	0.007276	C10H17N3O7S	NURJSGZGBVJFAD-ZLUOBGJFSA-N	Amino acids and peptides	Tripeptides	Protein	2.61	322.078	0.467462	1.49073	0.00899357
Peak_00740	N-Glycoloylneuraminate	0.012071	C11H18NO10	FDJKUWYYUZCUJX-PGIATKPXSA-M	Organooxygen compounds	Organooxygen compounds	Amino.Sugar	2.61	323.073	0.481973	1.36645	0.00877928
Peak_00941	Dehydroascorbic acid dimer	0.01888	C12H12O12	MUYNUOXIHSNESP-UHFFFAOYSA-N	Isosorbides	Isosorbides	Phytochemical.Oxyaromatic.Compound	0.799	347.006	0.236786	-1.31912	0.000432813
Peak_01103	Diacerin	0.0068	C19H12O8	TYNLGDBUJLVSMA-UHFFFAOYSA-N	Anthracenes	Anthracenecarboxylic acids	Phytochemical.Oxyaromatic.Compound	0.749	367.052	0.284538	-1.44997	0.000588547
Peak_01262	Tetracenomycin F2	0.0155	C20H16O8	OVIPDYYHLHEFDF-YIXHJXPBSA-N	Anthracenes	Anthracenes	Phytochemical.Oxyaromatic.Compound	0.749	383.061	0.376689	1.81599	0.00639246
Peak_01314	Secologanin	0.01	C17H24O10	CSKKDSFETGLMSB-NRZPKYKESA-N	Isoprenoids	C10 isoprenoids	Lipid	2.963	387.139	0.412147	1.88634	0.0158262
Peak_01693	S-Glutathionyl-cysteine	0.02209	C13H22N4O8S2	BNRXZEPOHPEEAS-FXQIFTODSA-N	Amino acids and peptides	Peptides	Protein	3.852	425.102	0.449389	1.58848	0.00375581
Peak_01718	Epsilon-rhodomycinone	0.0037	C22H20O9	PYFOXRACBORDCT-GOSXWKPOSA-N	Naphthacenes	Tetracenequinones	Phytochemical.Oxyaromatic.Compound	3.869	427.099	0.523852	1.4721	0.00584288
Peak_01805	Phlorizin	0.0021	C21H24O10	IOUVKUPGCMBWBT-QNDFHXLGSA-N	Flavonoids	Flavonoid glycosides	Phytochemical.Oxyaromatic.Compound	3.836	435.131	0.424173	1.55339	0.00376307
Peak_01823	Cys-Met-Trp	0.00345	C19H26N4O4S2	SDDJEOCJUFKAPV-BPUTZDHNSA-N	Amino acids and peptides	Tripeptides	Protein	3.852	437.135	0.418359	1.6733	0.00273041
Peak_02039	PE(O-14:0/2:0)	0.001458	C21H44NO7P	CIBZKQFKWPMFNT-OAQYLSRUSA-N	Glycerophosphoethanolamines	O-PE	Lipid	6.288	452.279	0.25124	2.11775	0.00874324
Peak_02124	Gln-Gln-Trp	0.012034	C21H28N6O6	QFJPFPCSXOXMKI-BPUTZDHNSA-N	Amino acids and peptides	Tripeptides	Protein	3.449	459.187	0.377347	1.20385	0.00965413
Peak_02341	LPE(18:3)	0.0011	C23H42NO7P		Glycerophosphoethanolamines	LPE	Lipid	5.494	474.263	0.424854	1.03384	0.0070169			0.2
Peak_02352	2-Methoxyestrone 3-glucuronide	0.0426	C25H32O9	NZTHZDNDYACBSX-FJNWEKAQSA-N	Steroid conjugates	Glucuronides	Phytochemical.Oxyaromatic.Compound	0.749	475.154	0.262491	-1.2204	0.00103871
Peak_02353	2-Methoxyestrone 3-glucuronide	0.0426	C25H32O9	NZTHZDNDYACBSX-FJNWEKAQSA-N	Steroid conjugates	Glucuronides	Phytochemical.Oxyaromatic.Compound	0.866	475.154	0.249627	-1.24304	0.00104869
Peak_02727	Griseorhodin A	0.0578	C25H16O12	MRNNMFMPNANLHB-UHFFFAOYSA-N	Naphthalenes	Naphthalenes	Phytochemical.Oxyaromatic.Compound	3.466	507.114	0.457264	1.0289	0.0177351
Peak_02802	LPI(12:0)	0.024432	C21H41O12P		Glycerophosphoinositols	LPI	Lipid	4.272	515.25	0.374112	1.41213	0.00302977
Peak_02826	Pelargonidin 3-O-(6-O-malonyl-beta-D-glucoside)	0.039134	C24H23O13	XLZUBCUKXQFBKB-JZWLZXDTSA-O	Flavonoids	Flavonoid glycosides	Phytochemical.Oxyaromatic.Compound	0.766	518.145	0.343368	-1.37174	0.000348661
Peak_02837	Latamoxef	0.054753	C20H20N6O9S	JWCSIUVGFCSJCK-CAVRMKNVSA-N	Amino acids and peptides	Amino acids	Protein	0.783	519.148	0.349361	-1.0433	0.000645407
Peak_02931	Mahuannin D	0.031035	C30H24O9	BHGCRZWUKWPRDM-TZVIJXGFSA-N	Flavonoids	Proanthocyanidins	Phytochemical.Oxyaromatic.Compound	0.716	527.103	0.270255	-1.03146	0.00244543
Peak_03015	Luteolin 7-O-(6''-malonylglucoside)	0.001	C24H22O14	RNDGJCZQVKFBPI-CFJLBEKGSA-N	Flavonoids	Flavones and Flavonols	Phytochemical.Oxyaromatic.Compound	3.533	533.094	0.0972544	-1.15434	0.00100101
Peak_03239	LPI(P-16:0)/LPI(O-16:1)	0.007253	C25H49O11P		Glycerophosphoinositols	O-LPI	Lipid	6.826	555.286	0.318067	1.12014	0.0321495
Peak_03283	LPG(22:4)	0.0106	C28H49O9P		Glycerophosphoglycerols	LPG	Lipid	5.82	559.314	0.348202	1.37795	0.00435619
Peak_03286	PC(16:1/4:1)	0.018057	C28H52NO8P		Glycerophosphocholines	PC	Lipid	5.82	560.317	0.387434	1.35887	0.00469069
Peak_03301	PG(P-18:1/4:1)/PG(O-18:2/4:1)	0.001073	C28H51O9P		Glycerophosphoglycerols	O-PG	Lipid	5.837	561.318	0.366969	1.45753	0.00272376
Peak_03310	Fosinopril	0.022811	C30H46NO7P	BIDNLKIUORFRQP-FKDWWROVSA-N	Amino acids and peptides	Amino acids	Lipid	5.62	562.316	0.258954	1.9212	0.00228649
Peak_03328	LPG(22:2)	0.0157	C28H53O9P		Glycerophosphoglycerols	LPG	Lipid	5.636	563.319	0.199917	1.69584	0.0026817
Peak_03342	Joro spider toxin	0.018782	C27H47N7O6	SJLRBGDPTALRDM-QFIPXVFZSA-N	Amino acids and peptides	Amino acids	Protein	6.02	564.332	0.313522	1.16984	0.00304691
Peak_03360	PG(O-18:0/4:1)	0.016373	C28H55O9P		Glycerophosphoglycerols	O-PG	Lipid	6.037	565.334	0.308758	1.12901	0.00547863
Peak_03402	PI(11:0/4:1)	0.084133	C24H43O13P		Glycerophosphoinositols	PI	Lipid	3.013	569.152	0.277677	-2.47667	0.0025444
Peak_03403	PI(11:0/4:1)	0.083133	C24H43O13P		Glycerophosphoinositols	PI	Lipid	3.315	569.153	0.303171	-2.22073	0.000421438
Peak_03430	PI(11:0/4:0)	0.048783	C24H45O13P	KCIXHDKWRPJWEN-CGWKNTEDSA-N	Glycerophosphoinositols	PI	Lipid	2.61	571.203	0.559898	2.72204	0.00874347
Peak_03441	MET-enkephalin	0.011719	C27H35N5O7S	YFGBQHOOROIVKG-FKBYEOEOSA-N	Amino acids and peptides	Amino acids	Protein	2.61	572.206	0.454032	2.65863	0.00892819
Peak_03492	Procyanidin B1	0.001569	C30H26O12	XFZJEEAOWLFHDH-UKWJTHFESA-N	Flavonoids	Proanthocyanidins	Phytochemical.Oxyaromatic.Compound	2.691	577.136	0.494893	3.79071	0.0225332
Peak_03512	Taurochenodeoxycholic acid 7-sulfate	0.1066	C26H45NO9S2	WTKQKSAFONWCMW-BJLOMENOSA-N	Bile acids	C24 bile acids	Lipid	2.691	578.139	0.453922	3.73553	0.0217159
Peak_03516	Taurochenodeoxycholic acid 7-sulfate	0.0274	C26H45NO9S2	WTKQKSAFONWCMW-BJLOMENOSA-N	Bile acids	C24 bile acids	Lipid	5.67	578.273	0.230396	1.26914	0.00581303
Peak_03717	LPI(18:3)	0.0005	C27H47O12P		Glycerophosphoinositols	LPI	Lipid	5.461	593.273	0.304105	1.40719	0.00132402
Peak_03906	Rutin	0.005615	C27H30O16	IKGXIBQEEMLURG-NVPNHPEKSA-N	Flavonoids	Flavonoid glycosides	Phytochemical.Oxyaromatic.Compound	3.148	609.151	0.402008	-1.01839	0.00104489
Peak_03964	Cytidine monophosphate N-acetylneuraminic acid	0.000733	C20H31N4O16P	TXCIAUNLDRJGJZ-BILDWYJOSA-N	Pyrimidines	Pyrimidine nucleotide sugars	Not.Matched	3.097	613.14	0.487698	-1.09871	0.0122799
Peak_03998	Heme	0.0513	C34H32FeN4O4	KABFMIBPWCXCRK-RGGAHWMASA-L	Metallotetrapyrroles	Metalloporphyrins	Phytochemical.Oxyaromatic.Compound	0.766	615.118	0.272409	-1.72143	0.00025201
Peak_04032	Bryotoxin A	0.1116	C32H42O12	KWKQJZASURFCDP-ZPARAVGQSA-N	Sterols	Bufanolides	Phytochemical.Oxyaromatic.Compound	0.915	617.148	0.384977	-1.71216	0.00105412
Peak_04039	Bryotoxin A	0.0506	C32H42O12	KWKQJZASURFCDP-ZPARAVGQSA-N	Sterols	Bufanolides	Phytochemical.Oxyaromatic.Compound	2.61	617.209	0.407503	2.49632	0.00588169
Peak_04062	Lanceotoxin A	0.1073	C32H44O12	IDZGCABQJKWSHL-GSMIIGJLSA-N	Sterols	Bufanolides	Lipid	3.198	619.168	0.399523	1.10941	0.0161385
Peak_04152	Gambogic acid	0.0044	C38H44O8	GEZHEQNLKAOMCA-PLUQQRNKSA-N	Benzopyrans	1-benzopyrans	Phytochemical.Oxyaromatic.Compound	5.837	627.3	0.316634	1.3278	0.00232126
Peak_04299	Plantamajoside	0.002665	C29H36O16	KFEFLPDKISUVNR-QJEHNBJNSA-N	Cinnamic acids	Hydroxycinnamic acids	Phytochemical.Oxyaromatic.Compound	2.61	639.195	0.365036	1.07155	0.000219364
Peak_04322	Haemocorin	0.0109	C32H34O14	FNZZYRONWCJZTM-CXWOCMNWSA-N	Naphthalenes	Phenylnaphthalenes	Phytochemical.Oxyaromatic.Compound	2.626	641.176	0.342048	1.21633	0.000669471
Peak_04357	Cefoperazone	0.0036	C25H27N9O8S2	GCFBRXLSHGKWDP-WTKTZPJXSA-N	Beta lactams	Cephalosporins	Protein	2.946	644.138	0.348784	1.86579	0.045893
Peak_04450	Bromocriptine	0.051282	C32H40BrN5O5	OZVBMTJYIDMWIL-AYFBDAFISA-N	Lysergic acids	Lysergic acids	Protein	2.61	652.162	0.561037	1.84318	0.0168386
Peak_04654	Agrimol C	0.013277	C36H44O12	PFWJPXGNICZIQB-UHFFFAOYSA-N	Diarylheptanoids	Linear diarylheptanoids	Phytochemical.Oxyaromatic.Compound	3.03	667.262	0.198192	2.34795	0.00534922
Peak_04682	PS(10:0_18:4)	0.127837	C34H58NO10P		Glycerophosphoserines	PS	Lipid	2.98	670.244	0.339232	1.50523	0.00104475
Peak_04722	Premithramycin A2'	0.0351	C33H38O15	MSZWVMYMDWJNJY-JYVXNHNOSA-N	Naphthalenes	Naphthols	Phytochemical.Oxyaromatic.Compound	4.02	673.178	0.206001	-2.04969	0.000349009
Peak_04785	LPIP(18:1)	0.072151	C27H52O15P2		Glycerophosphoinositols	LPIP	Lipid	3.181	677.198	0.53018	1.4774	0.0101004
Peak_04885	PA(15:1_20:2)	0.001992	C38H69O8P		Glycerophosphates	PA	Lipid	6.793	683.467	0.468664	-1.33297	0.00229521
Peak_04909	PE(32:3)	0.0107	C37H68NO8P		Glycerophosphoethanolamines	PE	Lipid	6.843	684.471	0.388125	-1.33522	0.00156448
Peak_05071	Dexylosylpradimicin C	0.052996	C34H34N2O14	RLAZQZRIYCOWMY-OVAHQGMASA-N	Naphthacenes	Tetracenequinones	Phytochemical.Oxyaromatic.Compound	2.98	693.246	0.604317	1.80411	0.0433981
Peak_05141	LPGP(26:2)	0.018344	C32H62O12P2		Glycerophosphoglycerols	LPGP	Lipid	6.004	699.382	0.328988	1.14233	0.0158307
Peak_05233	PA(15:0_22:6)	0.002642	C40H67O8P		Glycerophosphates	PA	Lipid	6.843	705.452	0.29799	-1.5183	0.00257235
Peak_05279	PA(15:0_22:5)	0.001992	C40H69O8P		Glycerophosphates	PA	Lipid	6.759	707.467	0.47968	-1.427	0.0192277
Peak_05280	PA(15:0_22:5)	0.000992	C40H69O8P		Glycerophosphates	PA	Lipid	10.702	707.466	0.441757	-1.10495	0.00278735
Peak_05301	PE(34:5)	0.0107	C39H68NO8P		Glycerophosphoethanolamines	PE	Lipid	6.826	708.471	0.427551	-1.49491	0.010404
Peak_05376	Digitalin	0.02201	C36H56O14	CKNOLMVLQUPVMU-YMMLYESFSA-N	Sterols	Cardanolides	Lipid	5.395	711.337	0.480553	2.14154	0.0308958
Peak_05663	LPIP(O-22:0)	0.002136	C31H64O14P2		Glycerophosphoinositols	O-LPIP	Lipid	5.389	721.367	0.321216	1.65725	0.0027043
Peak_05697	PS(32:6)	0.0331	C38H62NO10P		Glycerophosphoserines	PS	Lipid	5.389	722.37	0.346306	1.6802	0.00250234
Peak_05728	PI(10:0_16:1)	0.037283	C35H65O13P		Glycerophosphoinositols	PI	Lipid	5.395	723.371	0.348084	1.78721	0.002678
Peak_05996	LPIP(22:1)	0.133751	C31H60O15P2		Glycerophosphoinositols	LPIP	Lipid	3.903	733.199	0.6248	1.0869	0.0178965
Peak_06162	PI(10:0_17:1)	0.144933	C36H67O13P		Glycerophosphoinositols	PI	Lipid	4.354	737.279	0.653322	1.06197	0.0391459
Peak_06412	LPIP2(O-18:0)	0.000869	C27H57O17P3		Glycerophosphoinositols	LPIP2	Not.Matched	3.601	745.272	0.451141	1.35414	0.0188412
Peak_07774	5,6,7,8-Tetrahydromethanopterin	0.086034	C30H45N6O16P	SCBIBGUJSMHIAI-LHIIQLEZSA-N	Organooxygen compounds	Organooxygen compounds	Protein	2.997	775.341	0.639266	2.59461	0.0232599
Peak_07775	5,6,7,8-Tetrahydromethanopterin	0.085034	C30H45N6O16P	SCBIBGUJSMHIAI-LHIIQLEZSA-N	Organooxygen compounds	Organooxygen compounds	Protein	3.047	775.34	0.63673	2.62872	0.022818
Peak_08503	LPIP(26:1)	0.041351	C35H68O15P2		Glycerophosphoinositols	LPIP	Lipid	5.395	789.354	0.336372	1.73303	0.00105882
Peak_08556	PS(15:1_22:6)	0.107737	C43H70NO10P		Glycerophosphoserines	PS	Lipid	5.413	790.358	0.284831	1.18218	0.00356501
Peak_08852	LPIP3(O-16:1)	0.040748	C25H52O20P4		Glycerophosphoinositols	LPIP3	Carbohydrate	4.104	795.233	0.317736	-1.12049	0.000212036
Peak_08910	PI-Cer(d14:0/22:6)	0.2403	C42H72NO11P		Phosphosphingolipids	PI-Cer	Lipid	4.121	796.236	0.393161	-1.08711	0.000363125
Peak_08976	LPIP2(P-22:1)	0.008831	C31H61O17P3		Glycerophosphoinositols	LPIP2	Lipid	3.533	797.313	0.445716	1.0475	0.00212942
Peak_09761	Telithromycin	0.234143	C43H65N5O10	LJVAJPDWBABPEJ-AHMGRMSPSA-N	Organooxygen compounds	Organooxygen compounds	Lipid	4.054	810.231	0.23722	-1.15801	0.000218195
Peak_09820	LPIP3(16:0)	0.040833	C25H52O21P4		Glycerophosphoinositols	LPIP3	Carbohydrate	4.02	811.228	0.384174	-1.13802	0.000216252
Peak_09883	Troleandomycin	0.212075	C41H67NO15	LQCLVBQBTUVCEQ-QTFUVMRISA-N	Macrolides and analogues	Macrolides	Lipid	4.037	812.231	0.38565	-1.24	0.000248909
Peak_10088	LPIP2(22:0)	0.068734	C31H63O18P3		Glycerophosphoinositols	LPIP2	Lipid	3.701	815.246	0.338205	2.48041	0.00131395
Peak_10091	LPIP2(22:0)	0.037734	C31H63O18P3		Glycerophosphoinositols	LPIP2	Lipid	3.852	815.277	0.396761	2.07637	0.00156938
Peak_10159	PS(17:2_22:6)	0.201387	C45H72NO10P		Glycerophosphoserines	PS	Lipid	3.869	816.28	0.37569	1.98431	0.00150351
Peak_10850	Maltopentaose	0.052318	C30H52O26	FTNIPWXXIGNQQF-DWTFCAFKSA-N	Organooxygen compounds	Organooxygen compounds	Carbohydrate	3.651	827.319	0.522005	1.06788	0.00234787
Peak_12175	Precorrin-1	0.010881	C41H46N4O16	CJLVUWULFKHGFB-NZCAJUPMSA-N	Tetrapyrroles	Tetrapyrroles	Phytochemical.Oxyaromatic.Compound	4.004	849.272	0.326389	-1.10185	0.00251805
Peak_12557	PI(14:0_22:5)	0.119183	C45H77O13P		Glycerophosphoinositols	PI	Lipid	4.255	855.383	0.323429	1.60008	0.00256593
Peak_12627	PS(20:3_22:6)	0.126687	C48H76NO10P		Glycerophosphoserines	PS	Lipid	4.255	856.386	0.241989	1.45056	0.00223728
Peak_12812	LPIP3(20:4)	0.071833	C29H52O21P4		Glycerophosphoinositols	LPIP3	Not.Matched	0.733	859.259	0.346772	-1.39938	0.000205947
Peak_13187	LPIP3(20:1)	0.035117	C29H58O21P4		Glycerophosphoinositols	LPIP3	Not.Matched	2.963	865.199	0.547553	3.15357	0.0309666
Peak_18726	LPIP3(27:0)	0.028317	C36H74O21P4		Glycerophosphoinositols	LPIP3	Lipid	3.752	965.331	0.324028	1.14872	0.00278294
Peak_18784	PS(50:10)	0.2882	C56H90NO10P		Glycerophosphoserines	PS	Lipid	3.752	966.334	0.41383	1.22443	0.00583705
Peak_21316	PC(O-16:0/38:0)	0.299808	C62H126NO7P	UTOXODUQJHKXNT-QRXDBQBNSA-N	Glycerophosphocholines	O-PC	Lipid	4.305	1027.22	0.840607	1.20608	0.00903664
Peak_21503	PC(20:5_34:0)	0.413793	C62H114NO8P		Glycerophosphocholines	PC	Lipid	0.783	1031.23	0.293507	-1.13589	0.000203415
Peak_22088	PI(50:9)	0.2447	C59H97O13P		Glycerophosphoinositols	PI	Lipid	4.272	1043.41	0.36713	1.38374	0.00270284
Peak_22118	Nonadecanoyl-CoA	0.0488	C40H70N7O17P3S		Fatty esters	Acyl CoAs	Protein	4.288	1044.42	0.420306	1.3949	0.0022758
positive
Name	Name	Annotation error	Formula	inchi key	Main group	Sub group	Compound Match	RT Min	m.z	VIP score	log2fold change	adj p
Peak_00223	Styrene	0.000359	C8H8	PPBRXRYQALVLMV-UHFFFAOYSA-N	Benzenes	Styrenes	Phytochemical.Oxyaromatic.Compound	105.071	104.063	0.401635	2.63185	0.00565537
Peak_00255	Benzaldehyde	0.0001929	C7H6O	HUMNYLRZRPPJDN-UHFFFAOYSA-N	Benzenes	Benzoyl derivatives	Phytochemical.Oxyaromatic.Compound	107.05	106.042	0.701187	1.63035	0.00143169
Peak_00258	Benzaldehyde	0.0003345	C7H6O	HUMNYLRZRPPJDN-UHFFFAOYSA-N	Benzenes	Benzoyl derivatives	Phytochemical.Oxyaromatic.Compound	107.05	106.042	0.745238	1.18594	0.0266275
Peak_00291	Acetamidopropanal	5.89e-05	C5H9NO2	ARJPPNFIEQKVBB-UHFFFAOYSA-N	Aldehydes	Alpha-hydrogen aldehydes	Protein	116.071	115.063	0.556413	1.09925	0.0169367
Peak_00310	2,4-Dimethylaniline	1.34e-05	C8H11N	CZZZABOKJQXEBO-UHFFFAOYSA-N	Benzenes	Xylenes	Lipid	122.097	121.089	0.43598	1.92665	0.0154993
Peak_00363	2-Amino-4-methylpentanoic acid	3.6e-06	C6H13NO2	ROHFNLRQFUQHCH-UHFFFAOYSA-N	Fatty acids	Amino FA	Protein	132.103	131.095	0.68564	1.7646	0.00592168
Peak_00479	3,4-Dihydro-2H-1-benzopyran-2-one	0.0002432	C9H8O2	VMUXSMXIQBNMGZ-UHFFFAOYSA-N	3,4-dihydrocoumarins	3,4-dihydrocoumarins	Phytochemical.Oxyaromatic.Compound	149.061	148.053	0.874517	1.77071	0.0371178
Peak_00730	beta-Tyrosine	0.0002137	C9H11NO3	JYPHNHPXFNEZBR-UHFFFAOYSA-N	Amino acids and peptides	Amino acids	Phytochemical.Oxyaromatic.Compound	182.082	181.074	0.590123	1.96474	0.0136753
Peak_00790	Indoleacrylic acid	0.0007502	C11H9NO2	SXOUIMVOMIGLHO-AATRIKPKSA-N	Indoles	Indoles	Phytochemical.Oxyaromatic.Compound	188.072	187.064	0.295055	3.48026	0.00886971
Peak_00819	Dodecapentaenoic acid	0.000174	C12H14O2		Fatty acids	Unsaturated FA	Phytochemical.Oxyaromatic.Compound	191.108	190.1	0.538888	1.25745	0.00320272
Peak_00847	Ala-Cys	0.0032905	C6H12N2O3S	JQDFGZKKXBEANU-IMJSIDKUSA-N	Amino acids and peptides	Dipeptides	Protein	193.062	192.054	0.455094	1.06336	0.0272271
Peak_00949	D-Tryptophan	0.0008692	C11H12N2O2	QIVBCDIJIAJPQS-SECBINFHSA-N	Amino acids and peptides	Amino acids	Protein	205.099	204.091	0.230871	3.58145	0.00389933
Peak_01068	Pyrimidine nucleoside	0.0001811	C9H13N2O4	UAGYHIZGHDGMCY-FNCVBFRFSA-N	Pyrimidines	Pyrimidine nucleosides	Protein	214.095	213.087	0.48429	2.26182	0.00172575
Peak_01270	4-Fluoro-3-phenoxybenzoic acid	0.0043002	C13H9FO3	VLXNXMTVRWIUJZ-UHFFFAOYSA-N	Benzenes	Diphenylethers	Phytochemical.Oxyaromatic.Compound	233.066	232.058	0.685221	1.83635	0.00352337
Peak_01314	Isopropyl beta-D-thiogalactoside	0.0010206	C9H18O5S	BPHPUYQFMNQIOC-NXRLNHOXSA-N	Glycosyl compounds	Thioglycosides	Lipid	239.097	238.089	0.329437	1.68676	0.00623474
Peak_01665	Mannitol 1-phosphate	0.0355626	C6H15O9P	GACTWZZMVMUKNG-KVTDHHQDSA-N	Monosaccharides	Monosaccharide phosphates	Carbohydrate	263.018	262.01	0.541528	3.13606	0.00406782
Peak_01774	Coumestrol	0.0984124	C15H8O5	ZZIALNLLNHEQPJ-UHFFFAOYSA-N	Flavonoids	Coumestan flavonoids	Phytochemical.Oxyaromatic.Compound	268.947	267.939	1.00758	1.21067	0.0293743
Peak_01782	Moclobemide	0.002056	C13H17ClN2O2	YHXISWVBGDMDLQ-UHFFFAOYSA-N	Benzoic acids	4-halobenzoic acids	Protein	269.104	268.096	0.401417	1.7862	0.00320505
Peak_01801	5'-Deoxy-5'-fluoroadenosine	0.0060293	C10H12FN5O3	QPVLKMICBYRPSX-KQYNXXCUSA-N	Purines	Purine deoxyribonucleosides	Protein	270.106	269.098	0.44522	1.81169	0.00322504
Peak_01820	Leflunomide	0.0009218	C12H9F3N2O2	VHOGYURTWQBHIL-UHFFFAOYSA-N	Organonitrogen compounds	N-arylamides	Not.Matched	271.071	270.063	0.254772	1.46184	0.000685232
Peak_01840	(E,E)-Trichostachine	0.0143927	C16H17NO3	GQIJYUMTOUBHSH-IJIVKGSJSA-N	Benzodioxoles	Benzodioxoles	Phytochemical.Oxyaromatic.Compound	272.114	271.106	0.42214	1.78871	0.00634069
Peak_01942	10,12,15-Octadecatrienoic acid	0.0002823	C18H30O2	DASDQNZKDMCAQF-SIRUGEDZSA-N	Fatty acids	Unsaturated FA	Lipid	279.233	278.225	0.539184	1.70481	0.0371259
Peak_01965	Tyr-Val	0.0052472	C14H20N2O4	OYOQKMOWUDVWCR-RYUDHWBXSA-N	Amino acids and peptides	Dipeptides	Protein	281.156	280.148	0.257608	1.5304	0.00352452
Peak_02077	7-Aminoclonazepam	0.0021843	C15H12ClN3O	HEFRPWRJTGLSSV-UHFFFAOYSA-N	Heterocyclic compounds	Benzodiazepines	Not.Matched	286.073	285.065	0.261062	1.08799	0.00140715
Peak_02097	Salicin	0.0007733	C13H18O7	NGFMICBWJRZIBI-UJPOAAIJSA-N	Glycosyl compounds	O-glycosyl compounds	Lipid	287.114	286.106	0.419897	2.06998	0.00326062
Peak_02152	Acronycidine	0.0001005	C15H15NO5	XTCGYRFLVLFRGW-UHFFFAOYSA-N	Furanoquinolines	Furanoquinolines	Phytochemical.Oxyaromatic.Compound	290.103	289.095	0.607459	1.75617	0.0308432
Peak_02164	Catechin	0.0010813	C15H14O6	PFTAWBLQPZVEMU-DZGCQCFKSA-N	Flavonoids	Flavans, Flavanols and Leucoanthocyanidins	Phytochemical.Oxyaromatic.Compound	291.088	290.08	0.660412	1.67443	0.0194635
Peak_02182	N4-Acetylsulfapyridine	0.0090339	C13H13N3O3S	CYLYVXPHAQLXFG-UHFFFAOYSA-N	Benzenes	Benzenesulfonyl compounds	Protein	292.067	291.059	0.386371	1.06472	0.0072455
Peak_02185	Prontosil	0.0048429	C12H13N5O2S	ABBQGOCHXSPKHJ-WUKNDPDISA-N	Azobenzenes	Azobenzenes	Protein	292.092	291.084	0.660357	1.77334	0.0203908
Peak_02371	Peonidin	0.0228303	C16H13O6	XFDQJKDGGOEYPI-UHFFFAOYSA-O	Flavonoids	Anthocyanidins	Phytochemical.Oxyaromatic.Compound	302.102	301.094	0.499037	1.24856	0.0059404
Peak_02442	Phenamil	0.0002319	C12H12ClN7O	NIOHELZQFBGCEO-UHFFFAOYSA-N	Pyrazines	Pyrazinecarboxamides	Not.Matched	306.087	305.079	0.57438	1.94303	0.00593395
Peak_02510	Inodxyl glucuronide	0.0061377	C14H15NO7	KUYNOZVWCFXSNE-BYNIDDHOSA-N	Monosaccharides	O-glucuronides	Phytochemical.Oxyaromatic.Compound	310.099	309.091	0.542023	1.08459	0.000947031
Peak_02894	Hydroxyheneicosahexaenoic acid	0.0015339	C21H30O3		Fatty acids	Hydroxy FA	Lipid	331.226	330.218	0.338043	1.97888	0.0353792
Peak_03059	cis-Erucic acid	0.0028818	C22H42O2	DPUOLQHDNGRHBS-KTKRTIGZSA-N	Fatty acids	Unsaturated FA	Lipid	339.329	338.321	0.381492	1.02746	0.00886974
Peak_03381	CAR(13:2)	0.0082816	C20H35NO4		Fatty esters	Acyl carnitines	Lipid	354.273	353.265	0.498978	1.9974	0.021899
Peak_03551	5alpha-Cholanoic acid	0.289643	C24H40O2	RPKLZQLYODPWTM-NIRKWIOJSA-N	Bile acids	C24 bile acids	Lipid	361.6	360.592	0.297589	1.40465	0.000256031
Peak_03667	Nervonic acid	0.242102	C24H46O2	GWHCXVQVJPWHRF-KTKRTIGZSA-N	Fatty acids	Unsaturated FA	Lipid	367.6	366.592	0.200868	1.535	0.0002298
Peak_03672	Asp-Cys-Met	0.003586	C12H21N3O6S2	WXASLRQUSYWVNE-FXQIFTODSA-N	Amino acids and peptides	Tripeptides	Protein	368.099	367.091	0.300966	1.13557	0.00146473
Peak_03836	Kievitone hydrate	0.0007115	C20H22O7	QISUKJAAXYVLMA-UHFFFAOYSA-N	Flavonoids	Prenylated isoflavanones	Phytochemical.Oxyaromatic.Compound	375.145	374.137	0.408042	2.25262	0.0050066
Peak_04112	Sulfentrazone	0.0433072	C11H10Cl2F2N4O3S	OORLZFUTLGXMEF-UHFFFAOYSA-N	Triazoles	Phenyl-1,2,4-triazoles	Protein	387.033	386.025	0.683718	1.08741	0.00973146
Peak_04121	Cys-Gln-His	0.0003942	C14H22N6O5S	MWZSCEAYQCMROW-GUBZILKMSA-N	Amino acids and peptides	Tripeptides	Protein	387.146	386.138	0.595507	1.09249	0.0390955
Peak_04268	Arg-Asp-Cys	0.0001497	C13H24N6O6S	RCAUJZASOAFTAJ-FXQIFTODSA-N	Amino acids and peptides	Tripeptides	Protein	393.156	392.148	0.486868	2.30268	0.00324951
Peak_04455	Arg-Gln-Pro	0.0046565	C16H29N7O5	ZEAYJGRKRUBDOB-GARJFASQSA-N	Amino acids and peptides	Tripeptides	Protein	400.236	399.228	0.294924	1.84432	0.00219068
Peak_04457	Arg-Lys-Pro	0.0122851	C17H33N7O4	GRRXPUAICOGISM-RWMBFGLXSA-N	Amino acids and peptides	Tripeptides	Protein	400.255	399.247	0.690117	2.19559	0.00317056
Peak_04483	7alpha-Hydroxy-3,12-dioxochola-1,4-dien-24-oic acid	0.0054309	C24H32O5	QTUNPULUQOEUGW-DCKHNJRBSA-N	Bile acids	C24 bile acids	Lipid	401.238	400.23	0.283442	1.79837	0.0031755
Peak_04681	Asp-His-His	0.0026635	C16H21N7O6	WYOSXGYAKZQPGF-SRVKXCTJSA-N	Amino acids and peptides	Tripeptides	Protein	408.166	407.158	0.317616	1.40183	0.00137154
Peak_04684	Glu-Ile-Phe	0.0095894	C20H29N3O6	WTMZXOPHTIVFCP-QEWYBTABSA-N	Amino acids and peptides	Tripeptides	Protein	408.204	407.196	0.228167	2.48288	0.00221015
Peak_04713	Devazepide	0.001012	C25H20N4O2	NFHRQQKPEBFUJK-HSZRJFAPSA-N	Amino acids and peptides	Amino acids	Not.Matched	409.168	408.16	0.444371	1.41082	0.00229913
Peak_04770	Flumethasone	0.0003933	C22H28F2O5	WXURHACBFYSXBI-GQKYHHCASA-N	Steroids	C21 steroids	Phytochemical.Oxyaromatic.Compound	411.199	410.191	0.763382	1.021	0.0268464
Peak_04810	Podophyllotoxone	0.0009562	C22H20O8	ISCQYPPCSYRZOT-BKTGTZMESA-N	Aryltetralin lignans	Aryltetralin lignans	Phytochemical.Oxyaromatic.Compound	413.123	412.115	0.399695	1.3451	0.0014698
Peak_05232	S-Glutathionyl-cysteine	0.0089429	C13H22N4O8S2	BNRXZEPOHPEEAS-FXQIFTODSA-N	Amino acids and peptides	Peptides	Protein	427.105	426.097	0.710772	2.85739	0.0362481
Peak_05378	Ketoprofen glucuronide	0.0219679	C22H22O9	PBTXSZZKPHBHMA-LYFYOZKASA-N	Benzenes	Benzophenones	Phytochemical.Oxyaromatic.Compound	431.156	430.148	0.409618	2.04862	0.00269767
Peak_05656	Glu-Glu-Tyr	0.0094803	C19H25N3O9	BUAKRRKDHSSIKK-IHRRRGAJSA-N	Amino acids and peptides	Tripeptides	Protein	440.158	439.15	0.412534	4.17974	0.0100053
Peak_05721	Folic acid	0.0020748	C19H19N7O6	OVBPIULPVIDEAO-LBPRGKRZSA-N	Pterins	Folic acids	Protein	442.146	441.138	0.589648	1.11079	0.00462385
Peak_05744	Cer(d14:0/13:0)	0.201374	C27H55NO3	NNBMGBCEEBITHU-IZZNHLLZSA-N	Ceramides	DHCer	Lipid	442.628	441.62	0.363282	1.77888	0.000228703
Peak_05759	Granaticin	0.0082328	C23H22O9	QBQXQYSJPWXZJL-NWVAQQJZSA-N	Anthracenes	Anthraquinones	Phytochemical.Oxyaromatic.Compound	443.126	442.118	0.302068	1.51191	0.000737944
Peak_05975	Asp-Glu-Trp	0.000377	C20H24N4O8	GISFCCXBVJKGEO-QEJZJMRPSA-N	Amino acids and peptides	Tripeptides	Protein	449.167	448.159	0.437884	2.05343	0.00346549
Peak_06018	Glisoxepide	0.0119295	C20H27N5O5S	ZKUDBRCEOBOWLF-UHFFFAOYSA-N	Benzenesulfonamides	Benzenesulfonamides	Protein	450.169	449.161	0.381291	2.08459	0.0044876
Peak_06046	Exserohilone	0.0495651	C20H22N2O6S2	FWPMSYUTOOUASJ-GFIYPFTLSA-N	Indoles	Indoles	Phytochemical.Oxyaromatic.Compound	451.05	450.042	1.04078	1.95793	0.0294809
Peak_06134	Epicatechin 3-O-beta-D-glucoside	0.0300735	C21H24O11	YOVYWMDLYSJYPO-GZWGXFAISA-N	Flavonoids	Flavans, Flavanols and Leucoanthocyanidins	Phytochemical.Oxyaromatic.Compound	453.11	452.102	0.285152	1.06503	0.00349693
Peak_06184	LPC(13:0)	0.0001744	C21H44NO7P		Glycerophosphocholines	LPC	Lipid	454.293	453.285	0.539951	2.67778	0.0407954
Peak_06250	Cer(d14:0/14:0)	0.243439	C28H57NO3	KLBQTAJWYPPMOQ-RRPNLBNLSA-N	Ceramides	DHCer	Lipid	456.685	455.677	0.416484	2.37314	0.0251759
Peak_06360	5-Methyltetrahydrofolic acid	0.0093003	C20H25N7O6	ZNOVTXRBGFNYRX-STQMWFEESA-N	Pterins	Pterins	Protein	460.204	459.196	0.422084	1.17801	0.0171656
Peak_06546	Delphinidin 3-O-beta-D-glucoside	0.0309789	C21H21O12	XENHPQQLDPAYIJ-PEVLUNPASA-O	Flavonoids	Flavonoid glycosides	Phytochemical.Oxyaromatic.Compound	466.142	465.134	0.435096	1.5417	0.0034405
Peak_06659	Cromoglicic acid	0.0587848	C23H16O11	IMZMKUWMOSJXDT-UHFFFAOYSA-N	Benzopyrans	1-benzopyrans	Phytochemical.Oxyaromatic.Compound	469.136	468.128	0.469066	1.11167	0.0210945
Peak_07034	Dehydroemetine	0.0066081	C29H38N2O4	XXLZPUYGHQWHRN-RPBOFIJWSA-N	Tetrahydroisoquinolines	Tetrahydroisoquinolines	Phytochemical.Oxyaromatic.Compound	479.298	478.29	0.477895	1.54078	0.0376495
Peak_07161	LPS(15:1)	0.0113383	C21H40NO9P		Glycerophosphoserines	LPS	Lipid	482.241	481.233	0.469949	1.57785	0.00590748
Peak_07198	Silychristin	0.0054083	C25H22O10	BMLIIPOXVWESJG-LMBCONBSSA-N	Flavonoids	2-arylbenzofuran flavonoids	Phytochemical.Oxyaromatic.Compound	483.135	482.127	0.313021	1.19667	0.000321152
Peak_07201	PG(11:0/4:1)	0.0013586	C21H39O10P		Glycerophosphoglycerols	PG	Lipid	483.237	482.229	0.34556	3.28476	0.00328152
Peak_07531	PA(17:1/4:1)	0.0736843	C24H43O8P		Glycerophosphates	PA	Lipid	491.204	490.196	0.276206	4.79697	0.00589481
Peak_07621	PA(17:0/4:1)	0.0136073	C24H45O8P		Glycerophosphates	PA	Lipid	493.307	492.299	1.00406	2.51032	0.0347026
Peak_07808	Polypodine B	0.0012987	C27H44O8	GMFLGNRCCFYOKL-ACCCYTKYSA-N	Sterols	Cholesterols	Lipid	497.313	496.305	0.562464	1.98803	0.0245172
Peak_08262	Mucronine A	0.0008	C29H38N4O4	ZGVZGFFCCVLGFC-ORCBNIMNSA-N	Amino acids and peptides	Amino acids	Protein	507.297	506.289	0.348437	1.00357	0.0242767
Peak_08722	LPI(12:0)	0.0123103	C21H41O12P		Glycerophosphoinositols	LPI	Lipid	517.254	516.246	0.404423	1.53662	0.00501645
Peak_08777	LPC(18:3(6Z,9Z,12Z))	0.0013785	C26H48NO7P		Glycerophosphocholines	LPC	Lipid	518.326	517.318	0.52127	2.59263	0.0232475
Peak_08836	Cucurbitacin F	0.0022543	C30H46O7	AOHIGMQGPFTKQX-QZPKXHNASA-N	Sterols	Cholesterols	Lipid	519.33	518.322	0.47525	2.69665	0.024082
Peak_08878	LPC(0:0/18:2)	0.00174	C26H50NO7P		Glycerophosphocholines	LPC	Lipid	520.342	519.334	0.545065	1.86735	0.0349989
Peak_09058	Arg-Trp-Tyr	0.0640324	C26H33N7O5	VJIQPOJMISSUPO-BVSLBCMMSA-N	Amino acids and peptides	Tripeptides	Protein	524.198	523.19	0.597895	1.34221	0.00509753
Peak_09623	Cercosporin	0.0230513	C29H26O10	MXLWQNCWIIZUQT-QWRGUYRKSA-N	Perylenequinones	Perylenequinones	Phytochemical.Oxyaromatic.Compound	535.138	534.13	0.473597	1.08436	0.000324969
Peak_09675	Cyanidin 3-O-(6-O-malonyl-beta-D-glucoside)	0.0037234	C24H23O14	ROQLTZUOXIQBDO-JZWLZXDTSA-O	Flavonoids	Flavonoid glycosides	Phytochemical.Oxyaromatic.Compound	536.113	535.105	0.310878	1.04589	0.00140534
Peak_09885	PS(14:0/4:0)	0.0137704	C24H46NO10P	HWLNEMCKCNCWJS-RTWAWAEBSA-N	Glycerophosphoserines	PS	Lipid	540.308	539.3	0.234937	2.80298	0.0271751
Peak_09988	LPC(20:5)	0.0052395	C28H48NO7P		Glycerophosphocholines	LPC	Lipid	542.33	541.322	0.559643	1.38756	0.0471534
Peak_10198	Galactosyl-N-acetyllactosamine	0.0043252	C20H35NO16	DOTQRWNRHKNWIL-MOBJFDSMSA-N	Organooxygen compounds	Organooxygen compounds	Not.Matched	546.199	545.191	0.614951	1.45673	0.00457004
Peak_10506	Quercetin 3-O-malonylglucoside	0.0508264	C24H22O15	NBQPHANHNTWDML-UJKBSQBPSA-N	Flavonoids	Flavonoid glycosides	Phytochemical.Oxyaromatic.Compound	551.155	550.147	0.506884	1.32128	0.00462588
Peak_10934	Azidopine	0.0017215	C27H26F3N5O5	SWMHKFTXBOJETC-UHFFFAOYSA-N	Benzenes	Trifluoromethylbenzenes	Protein	558.198	557.19	0.535563	1.50557	0.0310673
Peak_10987	Albanol B	0.0452485	C34H22O8	SMHBZVSVLIBGGO-UHFFFAOYSA-N	Flavonoids	2-arylbenzofuran flavonoids	Phytochemical.Oxyaromatic.Compound	559.185	558.177	0.597913	1.70395	0.0376994
Peak_11716	DG(11:0_22:6)	0.037315	C36H58O5		Diradylglycerols	DAG	Lipid	571.399	570.391	0.690703	1.14673	0.0139327
Peak_11828	PI(11:0/4:0)	0.0483193	C24H45O13P	KCIXHDKWRPJWEN-CGWKNTEDSA-N	Glycerophosphoinositols	PI	Lipid	573.219	572.211	0.428007	2.22004	0.00327007
Peak_11899	MET-enkephalin	0.0094807	C27H35N5O7S	YFGBQHOOROIVKG-FKBYEOEOSA-N	Amino acids and peptides	Amino acids	Protein	574.224	573.216	0.4239	2.20986	0.00319577
Peak_11950	LPGP(17:2)	0.0130292	C23H44O12P2		Glycerophosphoglycerols	LPGP	Lipid	575.226	574.218	0.448765	2.39366	0.00344139
Peak_12210	Procyanidin B1	0.0038033	C30H26O12	XFZJEEAOWLFHDH-UKWJTHFESA-N	Flavonoids	Proanthocyanidins	Phytochemical.Oxyaromatic.Compound	579.154	578.146	0.697604	2.944	0.0256829
Peak_12272	Taurochenodeoxycholic acid 7-sulfate	0.104444	C26H45NO9S2	WTKQKSAFONWCMW-BJLOMENOSA-N	Bile acids	C24 bile acids	Lipid	580.157	579.149	0.704287	2.96132	0.0270035
Peak_12331	Carlinoside	0.0072662	C26H28O15	XBGYTZHKGMCEGE-VYUBKLCTSA-N	Flavonoids	Flavonoid glycosides	Phytochemical.Oxyaromatic.Compound	581.158	580.15	0.57305	1.7945	0.017707
Peak_12894	PS(18:2/4:1)	0.0819017	C28H48NO10P		Glycerophosphoserines	PS	Lipid	590.228	589.22	0.858992	1.45439	0.0315949
Peak_13497	PI(13:0/4:1)	0.112234	C26H47O13P		Glycerophosphoinositols	PI	Lipid	599.171	598.163	0.481255	1.06498	0.00771222
Peak_13564	Delphinine	0.146628	C33H45NO9	REVYTWNGZDPRKE-DBMGXYMYSA-N	Isoprenoids	C20 isoprenoids	Lipid	600.171	599.163	0.360693	1.01205	0.00515179
Peak_13704	LPS(24:4)	0.121697	C30H52NO9P		Glycerophosphoserines	LPS	Lipid	602.224	601.216	0.384588	1.24703	0.0251443
Peak_13878	Cerbertin	0.0180948	C32H44O11	NIVUJUXAQJVVHT-SXAYMNBUSA-N	Sterols	Cardenolide glycosides	Lipid	605.278	604.27	0.326666	1.5472	0.0297183
Peak_13943	PS(P-20:0/4:1)/PS(O-20:1/4:1)	0.0938399	C30H56NO9P		Glycerophosphoserines	O-PS	Lipid	606.283	605.275	0.335333	1.46592	0.0108564
Peak_14009	LPGP(19:0)	0.0076717	C25H52O12P2		Glycerophosphoglycerols	LPGP	Lipid	607.294	606.286	0.399308	1.5147	0.0266382
Peak_14056	Uridine 5'-Diphospho-N-acetylgalactosamine	0.178566	C17H27N3O17P2	LFTYTUAZOPRMMI-FTFHWYEPSA-N	Pyrimidines	Pyrimidine ribonucleoside diphosphates	Amino.Sugar	607.909	606.901	0.33139	2.00624	0.0189018
Peak_14071	Chymostatin	0.0218638	C31H41N7O6	MRXDGVXSWIXTQL-HYHFHBMOSA-N	Amino acids and peptides	Dipeptides	Protein	608.298	607.29	0.388409	1.39236	0.0282454
Peak_14133	Gyrocarpine	0.0026448	C37H40N2O6	VXPVPAHQYCJDTP-UHFFFAOYSA-N	Lignans	Lignans	Phytochemical.Oxyaromatic.Compound	609.299	608.291	0.401001	1.37033	0.0278779
Peak_14201	Tubocurarine	0.0006901	C37H41N2O6	JFJZZMVDLULRGK-URLMMPGGSA-O	Organooxygen compounds	Ethers	Phytochemical.Oxyaromatic.Compound	610.304	609.296	0.39028	1.35915	0.028486
Peak_14279	PI(14:1/4:1)	0.0222234	C27H47O13P		Glycerophosphoinositols	PI	Lipid	611.306	610.298	0.37733	1.41384	0.0239098
Peak_14416	Oxidized glutathione	0.0229896	C20H32N6O12S2	YPZRWBKMTBYPTK-BJDJZHNGSA-N	Amino acids and peptides	Peptides	Protein	613.183	612.175	0.351869	1.26937	0.000609748
Peak_14457	DG(36:6)	0.202571	C39H64O5		Diradylglycerols	DAG	Lipid	613.686	612.678	0.478538	1.23827	0.00144966
Peak_14486	6'''-Oxoneomycin C	0.104792	C23H43N5O14	ISQZALIQHGXYSL-VZXHOKRSSA-N	Aminosaccharides	Amino sugars	Protein	614.184	613.176	0.579875	1.23079	0.000768575
Peak_14935	Lanceotoxin A	0.0193731	C32H44O12	IDZGCABQJKWSHL-GSMIIGJLSA-N	Sterols	Bufanolides	Lipid	621.272	620.264	0.378623	2.29417	0.0277784
Peak_14997	Benzyloxycarbonylarginyl-arginine 4-methylcoumarin-7-ylamide	0.0341544	C30H39N9O6	MPTXQKPPFWMRPT-GOTSBHOMSA-N	Amino acids and peptides	Amino acids	Protein	622.276	621.268	0.401994	2.29383	0.02755
Peak_14998	Benzyloxycarbonylarginyl-arginine 4-methylcoumarin-7-ylamide	0.0280588	C30H39N9O6	MPTXQKPPFWMRPT-GOTSBHOMSA-N	Amino acids and peptides	Amino acids	Protein	622.282	621.274	0.265322	1.55429	0.0182101
Peak_15075	Thalmidine	0.0338591	C38H42N2O6	UUURWWVPMHAACP-KYJUHHDHSA-N	Lignans	Lignans	Phytochemical.Oxyaromatic.Compound	623.278	622.27	0.4312	2.20751	0.0216412
Peak_15256	11-trans-LTC4	0.100637	C30H47N3O9S	GWNVDXQDILPJIG-CCHJCNDSSA-N	Eicosanoids	Leukotrienes	Lipid	626.211	625.203	0.512681	1.41214	0.00593721
Peak_15447	Chlorophyllide b	0.0359185	C35H32MgN4O6	QPDWBRHRBKXUNS-IEEIVXFASA-L	Tetrapyrroles	Metallotetrapyrroles	Phytochemical.Oxyaromatic.Compound	629.189	628.181	0.637597	1.08529	0.0377972
Peak_15453	Primary fluorescent chlorophyll catabolite	0.0219571	C35H40N4O7	ULSSSZOYSMVFIJ-NPQUFKRBSA-N	Tetrapyrroles	Tetrapyrroles	Phytochemical.Oxyaromatic.Compound	629.276	628.268	0.688402	1.79987	0.00796263
Peak_15989	PS(22:6/4:1)	0.0345202	C32H48NO10P		Glycerophosphoserines	PS	Lipid	638.275	637.267	0.271361	2.04155	0.0224671
Peak_16049	LPIP(O-16:0)	0.0078258	C25H52O14P2		Glycerophosphoinositols	O-LPIP	Lipid	639.283	638.275	0.361001	1.74865	0.0232848
Peak_16052	PI(16:1/4:1)	0.0041259	C29H51O13P		Glycerophosphoinositols	PI	Lipid	639.311	638.303	0.515018	2.01622	0.00872137
Peak_16115	Protorifamycin I	0.0259373	C35H45NO10	DWSNNJANRGBGNU-SMGNAMCTSA-N	Macrolides and analogues	Macrolactams	Phytochemical.Oxyaromatic.Compound	640.286	639.278	0.248638	1.83859	0.0193108
Peak_16451	Coenzyme F420-1	0.0406972	C24H29N4O15P	WVEYWCGUSMKKMF-LADHFWMSSA-N	Amino acids and peptides	Amino acids	Not.Matched	645.185	644.177	0.671526	1.90139	0.0191424
Peak_16512	Cefoperazone	0.0385128	C25H27N9O8S2	GCFBRXLSHGKWDP-WTKTZPJXSA-N	Beta lactams	Cephalosporins	Protein	646.189	645.181	0.78234	2.02333	0.0190366
Peak_17075	Coproporphyrin I	0.0009631	C36H38N4O8	VORBHEGMEBOMMB-JRHDEHKPSA-N	Porphyrins	Porphyrins	Phytochemical.Oxyaromatic.Compound	655.278	654.27	0.359447	1.68015	0.0269386
Peak_17080	PI(17:0/4:1)	0.0337835	C30H55O13P		Glycerophosphoinositols	PI	Lipid	655.312	654.304	0.985207	2.65007	0.0121147
Peak_17150	Rifamycin W	0.0245939	C35H45NO11	PHKOJKSYBBXXED-OCENJLCRSA-N	Macrolides and analogues	Macrolactams	Phytochemical.Oxyaromatic.Compound	656.283	655.275	0.373445	1.77164	0.0251956
Peak_17154	Rifamycin W	0.0039159	C35H45NO11	PHKOJKSYBBXXED-OCENJLCRSA-N	Macrolides and analogues	Macrolactams	Phytochemical.Oxyaromatic.Compound	656.311	655.303	0.600385	2.03554	0.00893937
Peak_17222	Hellicoside	0.0163736	C29H36O17	IKASMYQBXBUEQS-AEAUTZEXSA-N	Hydroxycinnamic acids	Coumaric acids	Phytochemical.Oxyaromatic.Compound	657.22	656.212	0.409519	2.59458	0.00456698
Peak_17228	PI(10:0_11:0)	0.0768707	C30H57O13P		Glycerophosphoinositols	PI	Lipid	657.285	656.277	0.291872	1.83462	0.0167684
Peak_17387	PG(10:0_18:4)	0.0270821	C34H59O10P		Glycerophosphoglycerols	PG	Lipid	659.366	658.358	0.505536	2.03677	0.0252237
Peak_17452	Taurolithocholic acid 3-glucuronide	0.0277874	C32H53NO11S	YRKZDONPVFEWNN-HBCPYPPXSA-N	Bile acids	C24 bile acids	Lipid	660.37	659.362	0.643273	2.06757	0.0241123
Peak_18511	LPGP(24:0)	0.0063588	C30H62O12P2		Glycerophosphoglycerols	LPGP	Lipid	677.373	676.365	0.425407	1.70572	0.0316403
Peak_18572	PS(10:0_18:1)	0.0546049	C34H64NO10P		Glycerophosphoserines	PS	Lipid	678.38	677.372	0.581627	2.04019	0.0248397
Peak_19474	Fumonisin C2	0.165459	C33H57NO14	QYKFBSMPFHDZBZ-SOBJHFRFSA-N	Sphingoid bases	Sphingoid base analogs	Lipid	692.22	691.212	0.400287	1.10459	0.00322613
Peak_19603	PI-Cer(d14:1/14:1)	0.139824	C34H64NO11P		Phosphosphingolipids	PI-Cer	Lipid	694.29	693.282	0.258239	2.09517	0.0239847
Peak_19607	PI-Cer(d14:1/14:1)	0.0271794	C34H64NO11P		Phosphosphingolipids	PI-Cer	Lipid	694.403	693.395	0.400875	1.84235	0.0255236
Peak_19925	PI(10:0_14:0)	0.0510731	C33H63O13P		Glycerophosphoinositols	PI	Lipid	699.358	698.35	0.552993	1.81231	0.0194928
Peak_19932	PI(10:0_14:0)	0.0075945	C33H63O13P		Glycerophosphoinositols	PI	Lipid	699.401	698.393	0.520146	2.00762	0.0211426
Peak_19933	PI(10:0_14:0)	0.0113691	C33H63O13P		Glycerophosphoinositols	PI	Lipid	699.397	698.389	0.611507	2.16213	0.0338671
Peak_19989	Lasiodine A	0.0093429	C39H49N5O7	HXLYZPGZSZWTSW-ISFPBDNKSA-N	Amino acids and peptides	Amino acids	Protein	700.362	699.354	0.51259	1.78854	0.0188408
Peak_20178	LPIP2(14:1)	0.0027721	C23H45O18P3		Glycerophosphoinositols	LPIP2	Not.Matched	703.187	702.179	0.703114	1.04501	0.0332253
Peak_20425	LPIP(20:1)	0.0777674	C29H56O15P2		Glycerophosphoinositols	LPIP	Lipid	707.24	706.232	0.881691	2.02382	0.0174161
Peak_20428	LPIP(20:1)	0.0228587	C29H56O15P2		Glycerophosphoinositols	LPIP	Lipid	707.295	706.287	0.410082	1.41761	0.0240196
Peak_20451	PA(15:0_22:6)	0.0001375	C40H67O8P		Glycerophosphates	PA	Lipid	707.465	706.457	0.787946	1.31092	0.0261108
Peak_20452	MGDG(11:0_20:5)	0.0030211	C40H66O10		Glycosyldiradylglycerols	MGDG	Lipid	707.471	706.463	0.425581	1.03675	0.0168202
Peak_20454	PG(11:0_20:1)	0.0028636	C37H71O10P		Glycerophosphoglycerols	PG	Lipid	707.484	706.476	0.515132	1.09488	0.00595848
Peak_21017	PC(11:0_20:2)	0.0043846	C39H74NO8P		Glycerophosphocholines	PC	Lipid	716.528	715.52	0.424341	1.14716	0.00464381
Peak_21096	2,3-bis-O-(Geranylgeranyl)glycerol 1-phosphate	0.0071549	C43H73O6P	WHMXLRRVANEOOG-RQZHECMVSA-N	Isoprenoids	C20 isoprenoids	Lipid	717.53	716.522	0.481176	1.12418	0.00822941
Peak_22327	PI-Cer(d14:0/17:1)	0.0023153	C37H72NO11P		Phosphosphingolipids	PI-Cer	Lipid	738.49	737.482	0.504578	1.0105	0.00506018
Peak_22330	PE(14:0_22:5)	0.0003408	C41H72NO8P		Glycerophosphoethanolamines	PE	Lipid	738.508	737.5	0.564635	1.01023	0.0397489
Peak_22333	PC(11:0_22:5)	0.0022034	C41H72NO8P		Glycerophosphocholines	PC	Lipid	738.505	737.497	0.468608	1.00611	0.00588127
Peak_22392	PA(15:0_24:4)	0.018909	C42H75O8P		Glycerophosphates	PA	Lipid	739.509	738.501	0.462844	1.03905	0.0347843
Peak_23447	LPIP2(18:2)	0.0384676	C27H51O18P3		Glycerophosphoinositols	LPIP2	Not.Matched	757.198	756.19	0.70304	1.11357	0.0136892
Peak_24896	LPIP2(20:4)	0.0382214	C29H51O18P3		Glycerophosphoinositols	LPIP2	Not.Matched	781.275	780.267	0.291059	3.02076	0.00363799
Peak_24959	PI-Cer(d15:2/20:5)	0.184639	C41H68NO11P		Phosphosphingolipids	PI-Cer	Lipid	782.276	781.268	0.271962	3.16799	0.00345558
Peak_25091	PI-Cer(d15:1/20:5)	0.245231	C41H70NO11P		Phosphosphingolipids	PI-Cer	Lipid	784.231	783.223	0.22347	1.09691	0.000653225
Peak_25095	PI-Cer(d15:1/20:5)	0.197617	C41H70NO11P		Phosphosphingolipids	PI-Cer	Lipid	784.279	783.271	0.593662	1.37588	0.0191444
Peak_26182	LPIP2(21:0)	0.058301	C30H61O18P3		Glycerophosphoinositols	LPIP2	Lipid	803.257	802.249	0.429227	3.39409	0.00407613
Peak_26874	LPIP2(22:1)	0.0283024	C31H61O18P3		Glycerophosphoinositols	LPIP2	Lipid	815.287	814.279	0.44752	1.101	0.00317603
Peak_26877	LPIP2(22:1)	0.0012928	C31H61O18P3		Glycerophosphoinositols	LPIP2	Lipid	815.316	814.308	0.337683	1.29785	0.00149175
Peak_26878	LPIP2(22:1)	0.0393624	C31H61O18P3		Glycerophosphoinositols	LPIP2	Lipid	815.354	814.346	0.338029	1.5114	0.00183082
Peak_26931	PS(P-40:8)/PS(O-40:9)	0.233135	C46H74NO9P		Glycerophosphoserines	O-PS	Lipid	816.285	815.277	0.359986	1.09714	0.00459625
Peak_26932	PS(P-40:8)/PS(O-40:9)	0.198706	C46H74NO9P		Glycerophosphoserines	O-PS	Lipid	816.319	815.311	0.327705	1.31198	0.00155046
Peak_26933	PS(P-40:8)/PS(O-40:9)	0.200665	C46H74NO9P		Glycerophosphoserines	O-PS	Lipid	816.317	815.309	0.317578	1.3149	0.00143759
Peak_26934	PS(P-40:8)/PS(O-40:9)	0.156281	C46H74NO9P		Glycerophosphoserines	O-PS	Lipid	816.362	815.354	0.412975	1.36568	0.00377446
Peak_26975	LPIP2(22:0)	0.0413351	C31H63O18P3		Glycerophosphoinositols	LPIP2	Lipid	817.289	816.281	0.396219	1.97685	0.000367499
Peak_26978	LPIP2(22:0)	0.0123556	C31H63O18P3		Glycerophosphoinositols	LPIP2	Lipid	817.318	816.31	0.333771	1.46436	0.00146175
Peak_27581	Maltopentaose	0.0193965	C30H52O26	FTNIPWXXIGNQQF-DWTFCAFKSA-N	Organooxygen compounds	Organooxygen compounds	Carbohydrate	829.302	828.294	0.479285	1.23933	0.00864914
Peak_27676	LPIP2(23:0)	0.0864701	C32H65O18P3		Glycerophosphoinositols	LPIP2	Lipid	831.26	830.252	0.51679	1.08275	0.0169673
Peak_27719	Cephalomannine	0.0141401	C45H53NO14	DBXFAPJCZABTDR-ZFEYTSHUSA-N	Isoprenoids	C20 isoprenoids	Phytochemical.Oxyaromatic.Compound	832.34	831.332	0.299354	1.09207	0.00148663
Peak_27770	Premithramycin A3	0.0569637	C41H52O18	NVPFAZNHCJWHCL-JUEXJKKASA-N	Naphthalenes	Naphthols	Phytochemical.Oxyaromatic.Compound	833.266	832.258	0.291247	1.6027	0.00151794
Peak_27820	PS(18:1_22:6)	0.259298	C46H76NO10P		Glycerophosphoserines	PS	Lipid	834.269	833.261	0.180215	1.60609	0.00254726
Peak_27983	LPIP2(24:4)	0.0032239	C33H59O18P3		Glycerophosphoinositols	LPIP2	Lipid	837.296	836.288	0.361546	1.01952	0.00227523
Peak_28026	Butyryl-CoA	0.134272	C25H42N7O17P3S	CRFNGMNYKDXRTN-CITAKDKDSA-N	Fatty esters	Acyl CoAs	Protein	838.299	837.291	0.298438	1.01645	0.00157797
Peak_28378	LPIP2(24:0)	0.0368379	C33H67O18P3		Glycerophosphoinositols	LPIP2	Lipid	845.325	844.317	0.401365	1.12414	0.00150126
Peak_29442	LPIP3(20:1)	0.0303324	C29H58O21P4		Glycerophosphoinositols	LPIP3	Not.Matched	867.22	866.212	0.820901	2.86442	0.0275877
Peak_29656	LPIP2(26:1)	0.112768	C35H69O18P3		Glycerophosphoinositols	LPIP2	Lipid	871.265	870.257	0.499993	1.23952	0.00172161
Peak_29708	PI-Cer(d15:2/26:2)	0.333653	C47H86NO11P		Phosphosphingolipids	PI-Cer	Lipid	872.268	871.26	0.443519	1.20349	0.00218959
Peak_31767	alpha-Amanitin	0.0578099	C39H54N10O14S	CIORWBWIBBPXCG-SXZCQOKQSA-N	Amino acids and peptides	Amino acids	Protein	919.304	918.296	0.328134	1.6506	0.00135869
Peak_31802	2E-Decenoyl-CoA	0.0681406	C31H52N7O17P3S	MGNBGCRQQFMNBM-YJHHLLFWSA-N	Fatty esters	Acyl CoAs	Protein	920.311	919.303	0.346259	1.82354	0.000626021
Peak_32519	PI(18:1_24:4)	0.325103	C51H89O13P		Glycerophosphoinositols	PI	Lipid	941.287	940.279	0.342063	1.47617	0.00108712
Peak_32556	DG(O-60:3)	0.363501	C63H120O4		Diradylglycerols	O-DAG	Lipid	942.29	941.282	0.594397	1.90032	0.000770354
Peak_33046	PI(44:10)	0.267923	C53H83O13P		Glycerophosphoinositols	PI	Lipid	959.297	958.289	0.305997	1.35603	0.000721812
Peak_33073	DG(O-22:1_39:0)	0.326425	C64H126O4		Diradylglycerols	O-DAG	Lipid	960.3	959.292	0.285449	1.46217	0.000370472
Peak_33502	DGDG(17:2_22:6)	0.314148	C54H86O15		Glycosyldiradylglycerols	DGDG	Lipid	975.291	974.283	0.191702	1.53652	0.000596194
Peak_33506	DGDG(17:2_22:6)	0.280216	C54H86O15		Glycosyldiradylglycerols	DGDG	Lipid	975.324	974.316	0.242203	1.98922	0.00097895
Peak_33508	DGDG(17:2_22:6)	0.252053	C54H86O15		Glycosyldiradylglycerols	DGDG	Lipid	975.353	974.345	0.343228	2.55661	0.000557791
Peak_33538	11E-Tetradecenoyl-CoA	0.010147	C35H60N7O17P3S	WFGNMSCJASVFQK-XNKJMYHLSA-N	Fatty esters	Acyl CoAs	Protein	976.296	975.288	0.215231	1.55565	0.00057796
Peak_33564	DGDG(17:1_22:6)	0.32075	C54H88O15		Glycosyldiradylglycerols	DGDG	Lipid	977.3	976.292	0.199821	1.41259	0.000612431

## Sheet: mc_nc_y
Supplementary Table S1: Significance of the different mass features over various treatments. The data are shown separately for negative and positive mode. The significantly modified metabolites for each treatment are given on the separate sheets. The raw data is given in the Supplementary Table S5
Name: Putative annotation as shown in Supplementary Table S6
RT min: retention time
m.z: mass-to-charge ratio
VIP score: variable influence on projection
adj p: FDR adjusted P value (significance P< 0.005)
negative
Peak #	Name	Annotation error	Formula	inchi key	Main group	Sub group	Compound Match	RT Min	m.z	VIP score	log2fold change	adj p
Peak_00435	Arbutin	0.0014	C12H16O7	BJRNKVDFDLYUGJ-RMPHRYRLSA-N	Glycosyl compounds	O-glycosyl compounds	Lipid	2.725	271.083	0.46986	1.39718	0.00245515
Peak_00438	Thyronine	0.0061	C15H15NO4	KKCIOUWDFWQUBT-AWEZNQCLSA-N	Diarylethers	Diarylethers	Phytochemical.Oxyaromatic.Compound	2.742	272.086	0.484246	1.2714	0.0038789
Peak_00441	4-Ketocyclophosphamide	0.000916	C7H13Cl2N2O3P	VBMZHOCORXMDJU-UHFFFAOYSA-N	Organonitrogen compounds	Nitrogen mustard compounds	Protein	0.783	272.997	0.508538	-1.08343	0.0112799
Peak_00542	12,13-EpOME(9)	0.000854	C18H32O3	CCPPLLJZDQAOHD-DHZHZOJOSA-N	Octadecanoids	Other Octadecanoids	Lipid	5.954	295.228	0.342225	1.86491	0.00396954
Peak_00558	Carboxytolbutamide	0.006008	C12H16N2O5S	GCMVATDSSHTCOS-UHFFFAOYSA-N	Benzenes	Benzenesulfonyl compounds	Protein	2.725	299.076	0.634374	-1.02991	0.0312661
Peak_00630	6-Demethylsterigmatocystin	0.0073	C17H10O6	RQQOEIJLJPCYJR-BWKAKNAASA-N	Aflatoxins and related substances	Aflatoxins and related substances	Phytochemical.Oxyaromatic.Compound	0.766	309.047	0.580724	-1.40225	0.00923192
Peak_00634	Picrotin	0.0007	C15H18O7	RYEFFICCPKWYML-QCGISDTRSA-N	Furopyrans	Furopyrans	Phytochemical.Oxyaromatic.Compound	3.5	309.098	0.483291	1.63531	0.00384772
Peak_00998	Gentiopicrin	0.0013	C16H20O9	DUAGQYUORDTXOR-GPQRQXLASA-N	Isoprenoids	C10 isoprenoids	Phytochemical.Oxyaromatic.Compound	3.5	355.104	0.46776	1.72505	0.00438014
Peak_01008	Rosiglitazone	0.0003	C18H19N3O3S	YASAKCUCGLMORW-OAHLLOKOSA-N	Phenols	Phenol ethers	Protein	3.5	356.107	0.478697	1.74227	0.00434365
Peak_01038	Asn-Asp-Asp	0.006619	C12H18N4O9	XVVOVPFMILMHPX-ZLUOBGJFSA-N	Amino acids and peptides	Tripeptides	Protein	3.735	361.106	0.445692	-1.03947	0.00339132
Peak_01103	Diacerin	0.0068	C19H12O8	TYNLGDBUJLVSMA-UHFFFAOYSA-N	Anthracenes	Anthracenecarboxylic acids	Phytochemical.Oxyaromatic.Compound	0.749	367.052	0.238988	-1.55398	0.00155461
Peak_01292	1-O-Sinapoyl-beta-D-glucose	0.0493	C17H22O10	XRKBRPFTFKKHEF-DGDBGZAXSA-N	Hydroxycinnamic acids	Hydroxycinnamic acid glycosides	Phytochemical.Oxyaromatic.Compound	0.783	385.064	0.447537	-1.04584	0.00691604
Peak_01317	methyl 9-hydroperoxy-10,12,13,15-bisepidioxy-16E-octadecenoate	0.000721	C19H32O8	WBDZRMWZSZDXFJ-YCRREMRBSA-N	Fatty acids	Hydroperoxy FA	Lipid	3.148	387.201	0.500889	1.38922	0.00398343
Peak_01618	Trehalose 6-phosphate	0.042542	C12H23O14P	LABSPYBHMPDTEL-LIZSDCNHSA-N	Monosaccharides	Monosaccharide phosphates	Carbohydrate	0.85	421.032	0.475783	1.12463	0.00390649
Peak_01823	Cys-Met-Trp	0.00345	C19H26N4O4S2	SDDJEOCJUFKAPV-BPUTZDHNSA-N	Amino acids and peptides	Tripeptides	Protein	3.852	437.135	0.273886	1.20721	0.00108211
Peak_01949	Haplanthin	0.008	C22H24O10	MSNZOIOBTIHJTL-UHFFFAOYSA-N	Flavonoids	Flavanones	Phytochemical.Oxyaromatic.Compound	0.749	447.137	0.42135	-1.23964	0.00556469
Peak_01974	Exserohilone	0.0099	C20H22N2O6S2	FWPMSYUTOOUASJ-GFIYPFTLSA-N	Indoles	Indoles	Phytochemical.Oxyaromatic.Compound	3.231	449.074	0.554214	-1.51953	0.0029492
Peak_02039	PE(O-14:0/2:0)	0.001458	C21H44NO7P	CIBZKQFKWPMFNT-OAQYLSRUSA-N	Glycerophosphoethanolamines	O-PE	Lipid	6.288	452.279	0.635028	2.50084	0.00889281
Peak_02124	Gln-Gln-Trp	0.012034	C21H28N6O6	QFJPFPCSXOXMKI-BPUTZDHNSA-N	Amino acids and peptides	Tripeptides	Protein	3.449	459.187	0.484956	1.31794	0.00720885
Peak_02143	Isoscoparin	0.0008	C22H22O11	KOMUHHCFAXYRPO-DGHBBABESA-N	Flavonoids	Flavonoid glycosides	Phytochemical.Oxyaromatic.Compound	3.937	461.109	0.328838	1.30419	0.00326952
Peak_02146	Verbasoside	0.0197	C20H30O12	DORPKYRPJIIARM-UHFFFAOYSA-N	Glycosyl compounds	O-glycosyl compounds	Lipid	4.403	461.146	0.291226	1.07888	0.001651
Peak_02216	2,3-Epoxyphylloquinone	0.001696	C31H46O3	KUTXFBIHPWIDJQ-HBDFACPTSA-N	Quinones and hydroquinones	Vitamin K	Lipid	7.294	465.335	0.195371	-1.13303	0.00309093
Peak_02341	LPE(18:3)	0.0011	C23H42NO7P		Glycerophosphoethanolamines	LPE	Lipid	5.494	474.263	0.54933	1.23962	0.0203454
Peak_02575	Myricetin 3-glucuronide	0.0013	C21H18O14	MBWOCQLTCWTIJE-ROQVLGAUSA-N	Flavonoids	Flavones and Flavonols	Phytochemical.Oxyaromatic.Compound	3.013	493.063	0.472815	-1.63245	0.00311979
Peak_02802	LPI(12:0)	0.024432	C21H41O12P		Glycerophosphoinositols	LPI	Lipid	4.272	515.25	0.358123	1.56067	0.00383767
Peak_02820	Phellamurin	0.0288	C26H30O11	GRDZTDZJQRPNCN-YIANMRPHSA-N	Flavonoids	Flavonoid glycosides	Phytochemical.Oxyaromatic.Compound	0.716	517.142	0.494862	-1.23695	0.00338189
Peak_02826	Pelargonidin 3-O-(6-O-malonyl-beta-D-glucoside)	0.039134	C24H23O13	XLZUBCUKXQFBKB-JZWLZXDTSA-O	Flavonoids	Flavonoid glycosides	Phytochemical.Oxyaromatic.Compound	0.766	518.145	0.388883	-1.15408	0.00407018
Peak_02872	PG(14:1/4:1)	0.024612	C24H43O10P		Glycerophosphoglycerols	PG	Lipid	5.006	521.276	0.319996	-1.21345	0.00169691
Peak_02932	Mahuannin D	0.026035	C30H24O9	BHGCRZWUKWPRDM-TZVIJXGFSA-N	Flavonoids	Proanthocyanidins	Phytochemical.Oxyaromatic.Compound	1.718	527.108	0.31614	-2.20297	0.00540919
Peak_03239	LPI(P-16:0)/LPI(O-16:1)	0.007253	C25H49O11P		Glycerophosphoinositols	O-LPI	Lipid	6.826	555.286	0.302275	1.53762	0.0029527
Peak_03256	Albanol B	0.0395	C34H22O8	SMHBZVSVLIBGGO-UHFFFAOYSA-N	Flavonoids	2-arylbenzofuran flavonoids	Phytochemical.Oxyaromatic.Compound	0.833	557.084	0.424822	-1.67577	0.00132075
Peak_03283	LPG(22:4)	0.0106	C28H49O9P		Glycerophosphoglycerols	LPG	Lipid	5.82	559.314	0.46781	1.58881	0.00735432
Peak_03286	PC(16:1/4:1)	0.018057	C28H52NO8P		Glycerophosphocholines	PC	Lipid	5.82	560.317	0.377722	1.58491	0.00495713
Peak_03301	PG(P-18:1/4:1)/PG(O-18:2/4:1)	0.001073	C28H51O9P		Glycerophosphoglycerols	O-PG	Lipid	5.837	561.318	0.244965	1.60379	0.00404641
Peak_03310	Fosinopril	0.022811	C30H46NO7P	BIDNLKIUORFRQP-FKDWWROVSA-N	Amino acids and peptides	Amino acids	Lipid	5.62	562.316	0.412953	2.17602	0.00519923
Peak_03328	LPG(22:2)	0.0157	C28H53O9P		Glycerophosphoglycerols	LPG	Lipid	5.636	563.319	0.497958	2.10789	0.00694538
Peak_03342	Joro spider toxin	0.018782	C27H47N7O6	SJLRBGDPTALRDM-QFIPXVFZSA-N	Amino acids and peptides	Amino acids	Protein	6.02	564.332	0.445466	1.41477	0.0112362
Peak_03360	PG(O-18:0/4:1)	0.016373	C28H55O9P		Glycerophosphoglycerols	O-PG	Lipid	6.037	565.334	0.514307	1.54557	0.0113307
Peak_03402	PI(11:0/4:1)	0.084133	C24H43O13P		Glycerophosphoinositols	PI	Lipid	3.013	569.152	0.343649	-2.4971	0.00290574
Peak_03403	PI(11:0/4:1)	0.083133	C24H43O13P		Glycerophosphoinositols	PI	Lipid	3.315	569.153	0.265432	-2.26231	0.0014476
Peak_03430	PI(11:0/4:0)	0.048783	C24H45O13P	KCIXHDKWRPJWEN-CGWKNTEDSA-N	Glycerophosphoinositols	PI	Lipid	2.61	571.203	0.394286	2.55934	0.00117076
Peak_03504	Deserpidine	0.0152	C32H38N2O8	CVBMAZKKCSYWQR-WCGOZPBSSA-N	Aromatic heteropolycyclic compounds	Yohimbine alkaloids	Phytochemical.Oxyaromatic.Compound	5.653	577.27	0.274045	1.34863	0.00249136
Peak_03717	LPI(18:3)	0.0005	C27H47O12P		Glycerophosphoinositols	LPI	Lipid	5.461	593.273	0.446249	1.67445	0.00285706
Peak_03741	LPI(18:2)	0.0008	C27H49O12P		Glycerophosphoinositols	LPI	Lipid	5.904	595.289	0.493714	1.12588	0.00873815
Peak_03848	PA(10:0_19:0)	0.012058	C32H63O8P		Glycerophosphates	PA	Lipid	7.659	605.406	0.477192	-1.08497	0.00258862
Peak_03964	Cytidine monophosphate N-acetylneuraminic acid	0.000733	C20H31N4O16P	TXCIAUNLDRJGJZ-BILDWYJOSA-N	Pyrimidines	Pyrimidine nucleotide sugars	Not.Matched	3.097	613.14	0.506648	-1.02526	0.037105
Peak_03998	Heme	0.0513	C34H32FeN4O4	KABFMIBPWCXCRK-RGGAHWMASA-L	Metallotetrapyrroles	Metalloporphyrins	Phytochemical.Oxyaromatic.Compound	0.766	615.118	0.363178	-1.40065	0.00311339
Peak_04000	Heme	0.0543	C34H32FeN4O4	KABFMIBPWCXCRK-RGGAHWMASA-L	Metallotetrapyrroles	Metalloporphyrins	Phytochemical.Oxyaromatic.Compound	3.248	615.115	0.426004	-1.71687	0.00248546
Peak_04002	Heme	0.0113	C34H32FeN4O4	KABFMIBPWCXCRK-RGGAHWMASA-L	Metallotetrapyrroles	Metalloporphyrins	Phytochemical.Oxyaromatic.Compound	3.013	615.158	0.54493	-1.73125	0.00247058
Peak_04021	PS(20:2/4:1)	0.163887	C30H52NO10P		Glycerophosphoserines	PS	Lipid	3.013	616.161	0.492683	-1.60373	0.00310753
Peak_04032	Bryotoxin A	0.1116	C32H42O12	KWKQJZASURFCDP-ZPARAVGQSA-N	Sterols	Bufanolides	Phytochemical.Oxyaromatic.Compound	0.915	617.148	0.464163	-1.14065	0.00666374
Peak_04038	Bryotoxin A	0.1016	C32H42O12	KWKQJZASURFCDP-ZPARAVGQSA-N	Sterols	Bufanolides	Phytochemical.Oxyaromatic.Compound	0.866	617.158	0.370165	-1.01945	0.00438448
Peak_04136	PI(15:0/4:1)	0.120733	C28H51O13P		Glycerophosphoinositols	PI	Lipid	2.759	625.178	0.323289	1.62514	0.000941825
Peak_04143	LPS(26:5)	0.1646	C32H54NO9P		Glycerophosphoserines	LPS	Lipid	2.792	626.181	0.26161	1.43787	0.00100538
Peak_04152	Gambogic acid	0.0044	C38H44O8	GEZHEQNLKAOMCA-PLUQQRNKSA-N	Benzopyrans	1-benzopyrans	Phytochemical.Oxyaromatic.Compound	5.837	627.3	0.416218	1.71822	0.00442441
Peak_04226	Lactodifucotetraose	0.044	C24H42O19	BRHHWBDLMUBZQQ-JZEMXWCPSA-N	Oligosaccharides	Oligosaccharides	Not.Matched	3.131	633.18	0.502578	1.89102	0.00638761
Peak_04299	Plantamajoside	0.002665	C29H36O16	KFEFLPDKISUVNR-QJEHNBJNSA-N	Cinnamic acids	Hydroxycinnamic acids	Phytochemical.Oxyaromatic.Compound	2.61	639.195	0.364348	1.2206	0.00103383
Peak_04322	Haemocorin	0.0109	C32H34O14	FNZZYRONWCJZTM-CXWOCMNWSA-N	Naphthalenes	Phenylnaphthalenes	Phytochemical.Oxyaromatic.Compound	2.626	641.176	0.406666	1.12976	0.003053
Peak_04436	Esmeraldin B	0.028799	C38H28N4O7	UFEIYIBAKOKKBK-UHFFFAOYSA-N	Organonitrogen compounds	Amines	Phytochemical.Oxyaromatic.Compound	2.577	651.159	0.389072	1.85337	0.00108499
Peak_04513	Cyclic di-AMP	0.070961	C20H24N10O12P2	PDXMFTWFFKBFIN-XPWFQUROSA-N	Purines	Purine ribonucleoside monophosphates	Protein	2.61	657.168	0.368272	1.30516	0.00100159
Peak_04673	Patuletin 3-(6''-(E)-feruloylglucoside)	0.0976	C32H30O16	ZULMKQMCPUKDTD-YSUZLIATSA-N	Flavonoids	Flavones and Flavonols	Phytochemical.Oxyaromatic.Compound	2.963	669.243	0.359904	2.1552	0.00121228
Peak_04674	PI(10:0_12:0)	0.097333	C31H59O13P		Glycerophosphoinositols	PI	Lipid	2.997	669.264	0.351643	2.22112	0.00104499
Peak_04722	Premithramycin A2'	0.0351	C33H38O15	MSZWVMYMDWJNJY-JYVXNHNOSA-N	Naphthalenes	Naphthols	Phytochemical.Oxyaromatic.Compound	4.02	673.178	0.21086	-2.39299	0.00131213
Peak_04733	Fumonisin C4	0.192995	C33H57NO13	XRBVYXJCGATDLV-RVOPWPSLSA-N	Sphingoid bases	Sphingoid base analogs	Lipid	4.037	674.182	0.270706	-1.79379	0.00174374
Peak_05141	LPGP(26:2)	0.018344	C32H62O12P2		Glycerophosphoglycerols	LPGP	Lipid	6.004	699.382	0.588067	1.19689	0.0185804
Peak_05568	Azadirachtin A	0.069941	C35H44O16	FTNJWQUOZFUQQJ-NDAWSKJSSA-N	Isoprenoids	C30 isoprenoids	Phytochemical.Oxyaromatic.Compound	3.701	719.185	0.33344	-2.716	0.00118062
Peak_05609	Trypanothione disulfide	0.09273	C27H47N9O10S2	LZMSXDHGHZKXJD-VJANTYMQSA-N	Amino acids and peptides	Amino acids	Protein	3.701	720.188	0.295359	-2.44092	0.00130944
Peak_05663	LPIP(O-22:0)	0.002136	C31H64O14P2		Glycerophosphoinositols	O-LPIP	Lipid	5.389	721.367	0.39796	1.76761	0.00465669
Peak_05697	PS(32:6)	0.0331	C38H62NO10P		Glycerophosphoserines	PS	Lipid	5.389	722.37	0.317431	1.80129	0.00379175
Peak_05728	PI(10:0_16:1)	0.037283	C35H65O13P		Glycerophosphoinositols	PI	Lipid	5.395	723.371	0.351932	1.52684	0.00519388
Peak_05775	PI(26:0)	0.0109	C35H67O13P		Glycerophosphoinositols	PI	Lipid	6.709	725.413	0.321121	-1.23939	0.00306264
Peak_05783	PS(14:1_18:3)	0.1344	C38H66NO10P		Glycerophosphoserines	PS	Lipid	3.064	726.3	0.300811	1.34699	0.00154931
Peak_05999	LPIP(22:1)	0.067751	C31H60O15P2		Glycerophosphoinositols	LPIP	Lipid	3.55	733.265	0.248862	1.40374	0.00321039
Peak_06771	LPIP2(18:3)	0.016184	C27H49O18P3		Glycerophosphoinositols	LPIP2	Not.Matched	3.399	753.189	0.377535	-1.89456	0.00245832
Peak_07472	LPIP3(O-14:0)	0.044398	C23H50O20P4		Glycerophosphoinositols	LPIP3	Carbohydrate	3.148	769.221	0.298083	-1.12947	0.00165364
Peak_07473	LPIP3(O-14:0)	0.040398	C23H50O20P4		Glycerophosphoinositols	LPIP3	Carbohydrate	3.081	769.217	0.389025	-1.00091	0.00560942
Peak_07523	Leucomycin a5	0.2095	C39H65NO14	JZVYPSLDMXOITF-MJRCUCNNSA-N	Macrolides and analogues	Macrolides	Lipid	3.097	770.223	0.36714	-1.03039	0.00215365
Peak_07582	Kaempferol 3-sophorotrioside	0.0158	C33H40O21	MGAFCXOXRHSKIA-MEBVLIOMSA-N	Flavonoids	Flavonoid glycosides	Phytochemical.Oxyaromatic.Compound	3.55	771.214	0.311227	1.24144	0.00288047
Peak_07618	PI-Cer(d14:0/20:4)	0.3213	C40H72NO11P		Phosphosphingolipids	PI-Cer	Lipid	3.416	772.155	0.470137	1.31284	0.0133589
Peak_07620	PI-Cer(d14:0/20:4)	0.2933	C40H72NO11P		Phosphosphingolipids	PI-Cer	Lipid	3.483	772.183	0.335098	1.35007	0.00244153
Peak_07623	PI-Cer(d14:0/20:4)	0.2633	C40H72NO11P		Phosphosphingolipids	PI-Cer	Lipid	3.517	772.213	0.326448	1.3159	0.00212593
Peak_07774	5,6,7,8-Tetrahydromethanopterin	0.086034	C30H45N6O16P	SCBIBGUJSMHIAI-LHIIQLEZSA-N	Organooxygen compounds	Organooxygen compounds	Protein	2.997	775.341	0.30552	1.98483	0.00151972
Peak_07775	5,6,7,8-Tetrahydromethanopterin	0.085034	C30H45N6O16P	SCBIBGUJSMHIAI-LHIIQLEZSA-N	Organooxygen compounds	Organooxygen compounds	Protein	3.047	775.34	0.332755	1.99346	0.00160555
Peak_07777	PI(10:0_20:3)	0.067583	C39H69O13P		Glycerophosphoinositols	PI	Lipid	3.047	775.372	0.375409	1.75592	0.00117282
Peak_08503	LPIP(26:1)	0.041351	C35H68O15P2		Glycerophosphoinositols	LPIP	Lipid	5.395	789.354	0.414633	1.71801	0.00307796
Peak_08556	PS(15:1_22:6)	0.107737	C43H70NO10P		Glycerophosphoserines	PS	Lipid	5.413	790.358	0.436613	1.18261	0.00698454
Peak_08605	Cyanidin 3-rutinoside-5-glucoside	0.100029	C33H41ClO20	YBNGEAZRGBGUSJ-MWHWZGIKSA-N	Flavonoids	Flavonoid glycosides	Phytochemical.Oxyaromatic.Compound	3.5	791.28	0.499512	1.57294	0.00338202
Peak_08791	PI-Cer(d14:1/22:6)	0.2257	C42H70NO11P		Phosphosphingolipids	PI-Cer	Lipid	4.121	794.235	0.146245	-1.0333	0.00150645
Peak_08852	LPIP3(O-16:1)	0.040748	C25H52O20P4		Glycerophosphoinositols	LPIP3	Carbohydrate	4.104	795.233	0.121561	-1.17717	0.0014268
Peak_08910	PI-Cer(d14:0/22:6)	0.2403	C42H72NO11P		Phosphosphingolipids	PI-Cer	Lipid	4.121	796.236	0.172489	-1.14576	0.00151817
Peak_09761	Telithromycin	0.234143	C43H65N5O10	LJVAJPDWBABPEJ-AHMGRMSPSA-N	Organooxygen compounds	Organooxygen compounds	Lipid	4.054	810.231	0.226168	-1.41679	0.00109345
Peak_09820	LPIP3(16:0)	0.040833	C25H52O21P4		Glycerophosphoinositols	LPIP3	Carbohydrate	4.02	811.228	0.174556	-1.38843	0.000916881
Peak_09883	Troleandomycin	0.212075	C41H67NO15	LQCLVBQBTUVCEQ-QTFUVMRISA-N	Macrolides and analogues	Macrolides	Lipid	4.037	812.231	0.217017	-1.33374	0.00127085
Peak_09955	LPIP2(22:1)	0.003084	C31H61O18P3		Glycerophosphoinositols	LPIP2	Lipid	3.852	813.296	0.29255	1.24698	0.000942962
Peak_10088	LPIP2(22:0)	0.068734	C31H63O18P3		Glycerophosphoinositols	LPIP2	Lipid	3.701	815.246	0.199663	1.71002	0.00131354
Peak_10091	LPIP2(22:0)	0.037734	C31H63O18P3		Glycerophosphoinositols	LPIP2	Lipid	3.852	815.277	0.223463	1.57182	0.000902499
Peak_10159	PS(17:2_22:6)	0.201387	C45H72NO10P		Glycerophosphoserines	PS	Lipid	3.869	816.28	0.161105	1.56016	0.000817758
Peak_10225	Premithramycin A3'	0.1057	C40H50O18	AASZIVFAOBUOTM-QGYAIUEGSA-N	Naphthalenes	Naphthols	Phytochemical.Oxyaromatic.Compound	2.759	817.186	0.41837	-1.15368	0.00810096
Peak_10291	PS(17:1_22:6)	0.309037	C45H74NO10P		Glycerophosphoserines	PS	Lipid	2.792	818.188	0.31307	-1.14969	0.00820865
Peak_12335	3-Hydroxybutanoyl-CoA	0.062	C25H42N7O18P3S	QHHKKMYHDBRONY-RMNRSTNRSA-N	Fatty esters	Acyl CoAs	Protein	2.493	852.206	0.505165	3.45182	0.00560178
Peak_12403	LPIP3(19:0)	0.027117	C28H58O21P4		Glycerophosphoinositols	LPIP3	Not.Matched	2.444	853.207	0.458545	2.7603	0.00687574
Peak_12812	LPIP3(20:4)	0.071833	C29H52O21P4		Glycerophosphoinositols	LPIP3	Not.Matched	0.733	859.259	0.418857	-1.2428	0.00187052
Peak_13014	2E-Hexenoyl-CoA	0.1163	C27H44N7O17P3S	OINXHIBNZUUIMR-IXUYQXAASA-N	Fatty esters	Acyl CoAs	Protein	3.332	862.281	0.332985	1.26256	0.00171411
Peak_16370	alpha-Amanitin	0.106167	C39H54N10O14S	CIORWBWIBBPXCG-SXZCQOKQSA-N	Amino acids and peptides	Amino acids	Protein	3.349	917.24	0.380515	1.09174	0.0154346
Peak_18099	LPIP3(26:0)	0.051667	C35H72O21P4		Glycerophosphoinositols	LPIP3	Lipid	3.852	951.292	0.337804	1.42392	0.000808803
Peak_18925	Mycothione	0.02624	C34H58N4O24S2	YKSIHFDRGQQOCJ-LHHMOHDTSA-N	Organooxygen compounds	Organooxygen compounds	Amino.Sugar	2.997	969.254	0.360386	-1.70932	0.00166793
Peak_22088	PI(50:9)	0.2447	C59H97O13P		Glycerophosphoinositols	PI	Lipid	4.272	1043.41	0.263989	1.57324	0.00146938
Peak_22118	Nonadecanoyl-CoA	0.0488	C40H70N7O17P3S		Fatty esters	Acyl CoAs	Protein	4.288	1044.42	0.258711	1.51553	0.00111555
Peak_22240	GalCer(d20:2/39:0)	0.3005	C65H125NO8		Glycosphingolipids	HexCer	Lipid	3.315	1047.23	0.388404	-1.06822	0.00411179
Peak_22606	PS(O-18:0/38:0)	0.408628	C62H124NO9P	MHNJOHGFJNMSSL-KHGQOBKHSA-N	Glycerophosphoserines	O-PS	Lipid	3.114	1057.3	0.507325	-1.57882	0.00246108
Peak_22639	11Z-Eicosenoyl-CoA	0.0738	C41H72N7O17P3S	ZDRKXADSROCWCG-FVLDFCIYSA-N	Fatty esters	Acyl CoAs	Protein	3.131	1058.31	0.49966	-1.41125	0.00286258
positive
Name	Name	Annotation error	Formula	inchi key	Main group	Sub group	Compound Match	RT Min	m.z	VIP score	log2fold change	adj p
Peak_00223	Styrene	0.000359	C8H8	PPBRXRYQALVLMV-UHFFFAOYSA-N	Benzenes	Styrenes	Phytochemical.Oxyaromatic.Compound	2.44515	105.071	0.53748	2.82483	0.00606898
Peak_00255	Benzaldehyde	0.0001929	C7H6O	HUMNYLRZRPPJDN-UHFFFAOYSA-N	Benzenes	Benzoyl derivatives	Phytochemical.Oxyaromatic.Compound	2.54452	107.05	0.552474	1.46703	0.00941498
Peak_00310	2,4-Dimethylaniline	1.34e-05	C8H11N	CZZZABOKJQXEBO-UHFFFAOYSA-N	Benzenes	Xylenes	Lipid	2.44515	122.097	0.53048	2.16614	0.0117398
Peak_00351	Ureidoacrylic acid	0.004312	C4H6N2O3	JDSSVQWHYUVDDF-UPHRSURJSA-N	Vinylogous amides	Vinylogous amides	Protein	3.36229	131.05	0.959218	2.14701	0.00611608
Peak_00363	2-Amino-4-methylpentanoic acid	3.6e-06	C6H13NO2	ROHFNLRQFUQHCH-UHFFFAOYSA-N	Fatty acids	Amino FA	Protein	0.980667	132.103	0.826535	1.75675	0.0196346
Peak_00392	Fosfomycin	0.0128227	C3H7O4P	YMDXZJFXQJVXBF-STHAYSLISA-N	Organic phosphonic acids	Organic phosphonic acids	Carbohydrate	0.830715	139.003	0.834846	1.04555	0.00939752
Peak_00394	4-Hydroxybenzoic acid	0.0001695	C7H6O3	FJKROLUGYXJWQN-UHFFFAOYSA-N	Benzoic acids	Hydroxybenzoic acids	Phytochemical.Oxyaromatic.Compound	2.77572	139.04	0.553531	1.42786	0.0233511
Peak_00461	Coumarin	0.0005905	C9H6O2	ZYGHJZDHTFUPRJ-UHFFFAOYSA-N	Flavonoids	Coumarins	Phytochemical.Oxyaromatic.Compound	3.14422	147.045	0.820123	1.18535	0.0379931
Peak_00467	N-Methyl-N'-nitro-N-nitrosoguanidine	0.0010835	C2H5N5O3	VZUNGTLZRAYYDE-UHFFFAOYSA-N	Nitro compounds	Nitramines	Not.Matched	2.75936	148.048	0.426885	-1.27291	0.00263667
Peak_00479	3,4-Dihydro-2H-1-benzopyran-2-one	0.0002432	C9H8O2	VMUXSMXIQBNMGZ-UHFFFAOYSA-N	3,4-dihydrocoumarins	3,4-dihydrocoumarins	Phytochemical.Oxyaromatic.Compound	3.46257	149.061	0.493586	1.79677	0.00514392
Peak_00514	N-Methylethanolamine phosphate	2.51e-05	C3H10NO4P	HZDCAHRLLXEQFY-UHFFFAOYSA-N	Organic phosphoric acids	Phosphate esters	Not.Matched	0.66493	156.043	0.562743	-1.10843	0.0115757
Peak_00597	4-Acetamidobenzaldehyde	0.0014464	C9H9NO2	SKLUWKYNZNXSLX-UHFFFAOYSA-N	Anilides	Acetanilides	Phytochemical.Oxyaromatic.Compound	0.66493	164.07	0.381822	-1.70763	0.0015099
Peak_00682	Arginine	0.0009411	C6H14N4O2	ODKSFYDXXFIFQN-BYPYZUCNSA-N	Amino acids and peptides	Amino acids	Protein	0.674908	175.119	0.566936	1.17018	0.016478
Peak_00688	1,2,3-Propanetricarboxylic acid	0.0005522	C6H8O6	KQTIIICEAUMSDG-UHFFFAOYSA-N	Carboxylic acids	Tricarboxylic acids	Not.Matched	0.763696	177.041	0.6172	-2.01568	0.00214199
Peak_00730	beta-Tyrosine	0.0002137	C9H11NO3	JYPHNHPXFNEZBR-UHFFFAOYSA-N	Amino acids and peptides	Amino acids	Phytochemical.Oxyaromatic.Compound	0.847468	182.082	0.997239	1.73819	0.0170524
Peak_00790	Indoleacrylic acid	0.0007502	C11H9NO2	SXOUIMVOMIGLHO-AATRIKPKSA-N	Indoles	Indoles	Phytochemical.Oxyaromatic.Compound	2.57751	188.072	0.513058	3.86252	0.0145635
Peak_00949	D-Tryptophan	0.0008692	C11H12N2O2	QIVBCDIJIAJPQS-SECBINFHSA-N	Amino acids and peptides	Amino acids	Protein	2.57751	205.099	0.508677	3.76626	0.0115423
Peak_01068	Pyrimidine nucleoside	0.0001811	C9H13N2O4	UAGYHIZGHDGMCY-FNCVBFRFSA-N	Pyrimidines	Pyrimidine nucleosides	Protein	2.56097	214.095	0.35102	2.20784	0.00652441
Peak_01076	4-Bromophenylacetic acid	0.0529269	C8H7BrO2	QOWSWEBLNVACCL-UHFFFAOYSA-N	Halobenzenes	Bromobenzenes	Phytochemical.Oxyaromatic.Compound	0.570455	214.918	0.813196	-1.12131	0.00491907
Peak_01126	4-Amino-2-methyl-5-phosphomethylpyrimidine	0.0005392	C6H10N3O4P	PKYFHKIYHBRTPI-UHFFFAOYSA-N	Pyrimidines	Pyrimidines	Protein	0.847468	220.048	0.989149	1.04518	0.0171204
Peak_01191	2,5-Dichloro-4-oxohex-2-enedioate	0.0014182	C6H4Cl2O5	PLPVRWUZGSFJJB-OWOJBTEDSA-N	Fatty acids	Halogenated FA	Phytochemical.Oxyaromatic.Compound	9.9651	226.953	0.862616	1.22202	0.0444958
Peak_01665	Mannitol 1-phosphate	0.0355626	C6H15O9P	GACTWZZMVMUKNG-KVTDHHQDSA-N	Monosaccharides	Monosaccharide phosphates	Carbohydrate	0.713649	263.018	0.420357	2.50603	0.00289797
Peak_01782	Moclobemide	0.002056	C13H17ClN2O2	YHXISWVBGDMDLQ-UHFFFAOYSA-N	Benzoic acids	4-halobenzoic acids	Protein	2.39617	269.104	0.572855	1.75805	0.00798651
Peak_01820	Leflunomide	0.0009218	C12H9F3N2O2	VHOGYURTWQBHIL-UHFFFAOYSA-N	Organonitrogen compounds	N-arylamides	Not.Matched	0.730278	271.071	0.369361	-1.53939	0.00200787
Peak_01961	Sulfamonomethoxine	0.0025214	C11H12N4O3S	WMPXPUYPYQKQCX-UHFFFAOYSA-N	Benzenes	Benzenesulfonyl compounds	Protein	0.640272	281.074	0.423696	-1.03902	0.00127888
Peak_01965	Tyr-Val	0.0052472	C14H20N2O4	OYOQKMOWUDVWCR-RYUDHWBXSA-N	Amino acids and peptides	Dipeptides	Protein	2.51112	281.156	0.588792	1.39787	0.00998022
Peak_01976	Nitrazepam	0.0022707	C15H11N3O3	KJONHKAYOJNZEC-UHFFFAOYSA-N	1,4-benzodiazepines	1,4-benzodiazepines	Not.Matched	0.640272	282.086	0.394294	-1.34655	0.00145822
Peak_01985	Hexachlorobenzene	0.232807	C6Cl6	CKAPSXZOOQJIBF-UHFFFAOYSA-N	Halobenzenes	Chlorobenzenes	Phytochemical.Oxyaromatic.Compound	0.66493	282.588	0.402203	-1.20498	0.00153723
Peak_02077	7-Aminoclonazepam	0.0021843	C15H12ClN3O	HEFRPWRJTGLSSV-UHFFFAOYSA-N	Heterocyclic compounds	Benzodiazepines	Not.Matched	0.730278	286.073	0.486539	-1.32376	0.000970659
Peak_02148	N-Succinyl-2-amino-6-ketopimelate	0.013722	C11H15NO8	SDVXSCSNVVZWDD-LURJTMIESA-N	Amino acids and peptides	Amino acids	Not.Matched	0.640272	290.074	0.257039	-1.14095	0.00500679
Peak_02152	Acronycidine	0.0001005	C15H15NO5	XTCGYRFLVLFRGW-UHFFFAOYSA-N	Furanoquinolines	Furanoquinolines	Phytochemical.Oxyaromatic.Compound	3.31204	290.103	0.647278	-1.44865	0.00179011
Peak_02164	Catechin	0.0010813	C15H14O6	PFTAWBLQPZVEMU-DZGCQCFKSA-N	Flavonoids	Flavans, Flavanols and Leucoanthocyanidins	Phytochemical.Oxyaromatic.Compound	2.75936	291.088	0.474528	1.16779	0.0387436
Peak_02182	N4-Acetylsulfapyridine	0.0090339	C13H13N3O3S	CYLYVXPHAQLXFG-UHFFFAOYSA-N	Benzenes	Benzenesulfonyl compounds	Protein	0.684884	292.067	0.375388	-1.10979	0.0100792
Peak_02185	Prontosil	0.0048429	C12H13N5O2S	ABBQGOCHXSPKHJ-WUKNDPDISA-N	Azobenzenes	Azobenzenes	Protein	2.77572	292.092	0.498535	1.1947	0.0375635
Peak_02467	dCMP	0.0265683	C9H14N3O7P	NCMVOABPESMRCP-SHYZEUOFSA-N	Pyrimidines	Pyrimidine deoxyribonucleoside monophosphates	Protein	0.963913	308.038	0.584231	1.40264	0.0020265
Peak_02469	N-Allyladenosine	0.0024172	C13H17N5O4	WTYYPLSFICPDGL-QYVSTXNMSA-N	Purines	Purines	Protein	0.847468	308.134	0.54824	-1.16586	0.0209251
Peak_02480	Allamandin	0.0014824	C15H16O7	UEOKCUGZTJHPBW-AAKUPCIZSA-N	Isoprenoids	Terpene lactones	Phytochemical.Oxyaromatic.Compound	2.54452	309.096	0.476559	1.06552	0.00456621
Peak_02702	Phenolphthalin	0.0108575	C20H16O4	FFFPYJTVNSSLBQ-UHFFFAOYSA-N	Benzoic acids	Benzoic acids	Phytochemical.Oxyaromatic.Compound	3.82081	321.102	0.455499	-1.10596	0.00587806
Peak_02762	Pyochelin	0.0007632	C14H16N2O3S2	NYBZAGXTZXPYND-GDVCOKDOSA-N	Amino acids and peptides	Amino acids	Protein	2.54452	325.069	0.495936	1.02617	0.00670575
Peak_02894	Hydroxyheneicosahexaenoic acid	0.0015339	C21H30O3		Fatty acids	Hydroxy FA	Lipid	6.76239	331.226	0.635839	1.6347	0.0220452
Peak_03196	Eupatolitin	0.0005755	C17H14O8	WYKWHSPRHPZRCR-UHFFFAOYSA-N	Flavonoids	Flavones and Flavonols	Phytochemical.Oxyaromatic.Compound	3.429	347.077	0.351003	-1.10274	0.0307144
Peak_03236	IMP	0.0232683	C10H13N4O8P	GRSZFWQUAKGDAV-KQYNXXCUSA-N	Purines	Purine ribonucleoside monophosphates	Protein	3.05839	349.078	0.729485	-1.32696	0.0107411
Peak_03356	MG(18:3)	0.0006387	C21H36O4		Monoradylglycerols	MAG	Lipid	5.38326	353.27	0.554113	1.88306	0.0319651
Peak_03358	MG(18:3)	0.0007715	C21H36O4		Monoradylglycerols	MAG	Lipid	6.49338	353.27	0.784502	1.51591	0.0402991
Peak_03382	CAR(13:2)	0.0084819	C20H35NO4		Fatty esters	Acyl carnitines	Lipid	5.82689	354.273	0.410828	1.6942	0.0433561
Peak_03531	(S)-Rosmarinic acid	0.0074694	C18H16O8	DOUMFZQKYFQNTF-GIZXNFQBSA-N	Hydroxycinnamic acids	Coumaric acids	Phytochemical.Oxyaromatic.Compound	0.730278	361.1	0.438709	-2.1796	0.000354731
Peak_03580	Chelirubine	0.0013168	C21H16NO5	RNSBFHHWMMKJAM-UHFFFAOYSA-N	Benzophenanthridine alkaloids	Quaternary benzophenanthridine alkaloids	Phytochemical.Oxyaromatic.Compound	0.640272	363.112	0.262077	-1.189	0.00106604
Peak_03583	Antirrhinoside	0.0047365	C15H22O10	UBAIOTDKPLIEDD-RNCITLLOSA-N	Glycosyl compounds	O-glycosyl compounds	Not.Matched	0.697057	363.134	0.62636	-1.07753	0.00181283
Peak_03597	Tetracosatrienoic acid	0.288492	C24H42O2		Fatty acids	Unsaturated FA	Lipid	0.646968	363.615	0.447382	-1.11644	0.000981374
Peak_03603	Rufloxacin	0.0009747	C17H18FN3O3S	NJCJBUHJQLFDSW-UHFFFAOYSA-N	Quinolines	Quinoline carboxylic acids	Protein	0.646968	364.114	0.34504	-1.23782	0.00122534
Peak_03650	Atovaquone	0.0133232	C22H19ClO3	KUCQYCKVKVOKAY-CTYIDZIISA-N	Naphthalenes	Naphthoquinones	Phytochemical.Oxyaromatic.Compound	0.746939	367.097	0.562256	-1.43072	0.0017895
Peak_03654	Atovaquone	0.0099335	C22H19ClO3	KUCQYCKVKVOKAY-CTYIDZIISA-N	Naphthalenes	Naphthoquinones	Phytochemical.Oxyaromatic.Compound	0.640272	367.1	0.562256	-1.43072	0.00176239
Peak_03667	Nervonic acid	0.242102	C24H46O2	GWHCXVQVJPWHRF-KTKRTIGZSA-N	Fatty acids	Unsaturated FA	Lipid	0.746939	367.6	0.288317	-1.50254	0.00197885
Peak_03672	Asp-Cys-Met	0.003586	C12H21N3O6S2	WXASLRQUSYWVNE-FXQIFTODSA-N	Amino acids and peptides	Tripeptides	Protein	0.746939	368.099	0.343217	-1.14135	0.00444093
Peak_03733	Fraxin	0.0080674	C16H18O10	CRSFLLTWRCYNNX-YJADWKFMSA-N	Flavonoids	Coumarin glycosides	Phytochemical.Oxyaromatic.Compound	0.640272	371.106	0.432844	-1.33845	0.00121269
Peak_03760	Cholest-5-ene	0.238366	C27H46	DTGDZMYNKLTSKC-HKQCOZBKSA-N	Sterols	Cholesterols	Lipid	0.697057	371.606	0.456174	-1.02285	0.00197048
Peak_03847	Digitoxigenin	0.0026726	C23H34O4	XZTUSOXSLKTKJQ-CESUGQOBSA-N	Sterols	Cardanolides	Lipid	6.51025	375.251	0.718758	1.36115	0.0433728
Peak_03866	Lys-Lys-Thr	0.0019869	C16H33N5O5	PLDJDCJLRCYPJB-VOAKCMCISA-N	Amino acids and peptides	Tripeptides	Protein	6.44303	376.254	0.514009	1.41105	0.0373427
Peak_04214	5,7,2'-Trihydroxy-3,6,4',5'-tetramethoxyflavone	0.0034164	C19H18O9	YEALILHFFIHIQL-UHFFFAOYSA-N	Flavonoids	Flavones and Flavonols	Phytochemical.Oxyaromatic.Compound	0.713649	391.107	0.521582	2.40598	0.00148299
Peak_04268	Arg-Asp-Cys	0.0001497	C13H24N6O6S	RCAUJZASOAFTAJ-FXQIFTODSA-N	Amino acids and peptides	Tripeptides	Protein	2.54452	393.156	0.641952	2.38838	0.00701834
Peak_04435	7-Oxo-cholestenone	0.000519	C27H42O2	SQPQMCUHNOULQL-KRQCSNJGSA-N	Sterols	Cholesterols	Lipid	7.71981	399.327	0.46375	-1.21624	0.00902403
Peak_04455	Arg-Gln-Pro	0.0046565	C16H29N7O5	ZEAYJGRKRUBDOB-GARJFASQSA-N	Amino acids and peptides	Tripeptides	Protein	2.47803	400.236	0.390742	1.80363	0.00538803
Peak_04457	Arg-Lys-Pro	0.0122851	C17H33N7O4	GRRXPUAICOGISM-RWMBFGLXSA-N	Amino acids and peptides	Tripeptides	Protein	2.54452	400.255	0.529437	2.12848	0.0042675
Peak_04483	7alpha-Hydroxy-3,12-dioxochola-1,4-dien-24-oic acid	0.0054309	C24H32O5	QTUNPULUQOEUGW-DCKHNJRBSA-N	Bile acids	C24 bile acids	Lipid	2.52785	401.238	0.389539	1.91005	0.00505727
Peak_04675	S-Succinylglutathione	0.0734835	C14H21N3O9S	CEWPGJBJGGBRQM-YUMQZZPRSA-N	Amino acids and peptides	Amino acids	Protein	0.830715	408.034	0.387379	1.30513	0.00135558
Peak_04681	Asp-His-His	0.0026635	C16H21N7O6	WYOSXGYAKZQPGF-SRVKXCTJSA-N	Amino acids and peptides	Tripeptides	Protein	3.78724	408.166	0.40379	1.12941	0.00257816
Peak_04684	Glu-Ile-Phe	0.0095894	C20H29N3O6	WTMZXOPHTIVFCP-QEWYBTABSA-N	Amino acids and peptides	Tripeptides	Protein	2.44515	408.204	0.47814	2.68018	0.00556534
Peak_04713	Devazepide	0.001012	C25H20N4O2	NFHRQQKPEBFUJK-HSZRJFAPSA-N	Amino acids and peptides	Amino acids	Not.Matched	3.82081	409.168	0.312679	1.01892	0.0049642
Peak_04810	Podophyllotoxone	0.0009562	C22H20O8	ISCQYPPCSYRZOT-BKTGTZMESA-N	Aryltetralin lignans	Aryltetralin lignans	Phytochemical.Oxyaromatic.Compound	3.80403	413.123	0.302848	1.09002	0.00140412
Peak_04814	Cys-Gln-Tyr	0.0062392	C17H24N4O6S	PFAQXUDMZVMADG-AVGNSLFASA-N	Amino acids and peptides	Tripeptides	Protein	3.52972	413.156	0.465546	1.45308	0.00136505
Peak_04815	N6-Carbamoyl-L-threonyladenosine	0.0015381	C15H20N6O8	UNUYMBPXEFMLNW-DWVDDHQFSA-N	Purines	Purine deoxyribonucleosides	Protein	3.9047	413.144	0.361231	1.15933	0.00286914
Peak_04842	Cys-Glu-Tyr	0.0080045	C17H23N3O7S	AOZBJZBKFHOYHL-AVGNSLFASA-N	Amino acids and peptides	Tripeptides	Protein	3.80403	414.126	0.305119	1.13549	0.00141427
Peak_05298	Epsilon-rhodomycinone	0.0016542	C22H20O9	PYFOXRACBORDCT-GOSXWKPOSA-N	Naphthacenes	Tetracenequinones	Phytochemical.Oxyaromatic.Compound	3.51293	429.117	0.464321	1.31264	0.00156729
Peak_05378	Ketoprofen glucuronide	0.0219679	C22H22O9	PBTXSZZKPHBHMA-LYFYOZKASA-N	Benzenes	Benzophenones	Phytochemical.Oxyaromatic.Compound	2.54452	431.156	0.598272	1.94185	0.00892975
Peak_05656	Glu-Glu-Tyr	0.0094803	C19H25N3O9	BUAKRRKDHSSIKK-IHRRRGAJSA-N	Amino acids and peptides	Tripeptides	Protein	3.31204	440.158	0.387432	5.0205	0.00604764
Peak_05719	Folic acid	0.0225696	C19H19N7O6	OVBPIULPVIDEAO-LBPRGKRZSA-N	Pterins	Folic acids	Protein	0.697057	442.125	0.563	-1.82065	0.00150171
Peak_05721	Folic acid	0.0020748	C19H19N7O6	OVBPIULPVIDEAO-LBPRGKRZSA-N	Pterins	Folic acids	Protein	0.746939	442.146	0.248979	-1.45318	0.00132529
Peak_05744	Cer(d14:0/13:0)	0.201374	C27H55NO3	NNBMGBCEEBITHU-IZZNHLLZSA-N	Ceramides	DHCer	Lipid	0.746939	442.628	0.293561	-1.93399	0.00102863
Peak_05759	Granaticin	0.0082328	C23H22O9	QBQXQYSJPWXZJL-NWVAQQJZSA-N	Anthracenes	Anthraquinones	Phytochemical.Oxyaromatic.Compound	0.697057	443.126	0.367403	-1.55244	0.001096
Peak_05975	Asp-Glu-Trp	0.000377	C20H24N4O8	GISFCCXBVJKGEO-QEJZJMRPSA-N	Amino acids and peptides	Tripeptides	Protein	2.49453	449.167	0.629916	2.06258	0.00775762
Peak_06018	Glisoxepide	0.0119295	C20H27N5O5S	ZKUDBRCEOBOWLF-UHFFFAOYSA-N	Benzenesulfonamides	Benzenesulfonamides	Protein	2.54452	450.169	0.549079	1.9164	0.00941195
Peak_06184	LPC(13:0)	0.0001744	C21H44NO7P		Glycerophosphocholines	LPC	Lipid	6.29204	454.293	0.72512	2.79418	0.0282516
Peak_06201	Kinamycin D	0.0108067	C22H18N2O9	KPVVXTRWIKTJBS-DXBBTUNJSA-N	Naphthalenes	Naphthols	Phytochemical.Oxyaromatic.Compound	2.97545	455.12	0.461928	-1.96415	0.00382605
Peak_06546	Delphinidin 3-O-beta-D-glucoside	0.0309789	C21H21O12	XENHPQQLDPAYIJ-PEVLUNPASA-O	Flavonoids	Flavonoid glycosides	Phytochemical.Oxyaromatic.Compound	0.730278	466.142	0.257355	1.13329	0.0119398
Peak_06876	Robustaol A	0.0204673	C25H30O9	VQIUVVRPDIFIPV-UHFFFAOYSA-N	Benzenes	Diphenylmethanes	Phytochemical.Oxyaromatic.Compound	0.640272	475.177	0.486876	1.88215	0.0171295
Peak_06916	LPE(18:3)	0.0009524	C23H42NO7P		Glycerophosphoethanolamines	LPE	Lipid	5.45538	476.279	0.58249	1.83309	0.041527
Peak_07101	11-O-Demethylpradinone II	0.0040554	C24H16O11	WPQNJCYILUYTQH-MBSDFSHPSA-N	Naphthacenes	Tetracenequinones	Phytochemical.Oxyaromatic.Compound	0.631247	481.081	0.516894	-1.19615	0.00179421
Peak_07156	Yersiniabactin	0.0121301	C21H27N3O4S3	CARQCAHMXWHUIE-NRMQOZBLSA-N	Ketones	O-quinomethanes	Protein	0.830715	482.112	0.495796	-1.44913	0.000887152
Peak_07161	LPS(15:1)	0.0113383	C21H40NO9P		Glycerophosphoserines	LPS	Lipid	2.62688	482.241	0.562307	1.4276	0.00993863
Peak_07201	PG(11:0/4:1)	0.0013586	C21H39O10P		Glycerophosphoglycerols	PG	Lipid	2.59401	483.237	0.375027	3.42428	0.00752031
Peak_07531	PA(17:1/4:1)	0.0736843	C24H43O8P		Glycerophosphates	PA	Lipid	2.59401	491.204	0.339776	4.70995	0.0121474
Peak_07621	PA(17:0/4:1)	0.0136073	C24H45O8P		Glycerophosphates	PA	Lipid	6.6111	493.307	1.00462	1.68369	0.0433389
Peak_07683	Myricetin 3-glucuronide	0.0006481	C21H18O14	MBWOCQLTCWTIJE-ROQVLGAUSA-N	Flavonoids	Flavones and Flavonols	Phytochemical.Oxyaromatic.Compound	2.9587	495.078	0.315681	-1.67956	0.00179266
Peak_07728	N(6)-(Dimethylallyl)adenosine 5'-diphosphate	0.0317986	C15H23N5O10P2	VXMXKDAHJURHEN-SDBHATRESA-N	Purines	Purine ribonucleotides	Protein	3.80403	496.132	0.471906	1.10113	0.00767922
Peak_07766	Cer(m32:0)	0.123376	C32H65NO2		Ceramides	Cer	Lipid	3.80403	496.633	0.498479	1.2126	0.00202641
Peak_07808	Polypodine B	0.0012987	C27H44O8	GMFLGNRCCFYOKL-ACCCYTKYSA-N	Sterols	Cholesterols	Lipid	5.38326	497.313	0.512653	1.83691	0.0361124
Peak_07857	LPS(16:0)	0.0315247	C22H44NO9P		Glycerophosphoserines	LPS	Lipid	5.82689	498.315	0.392094	1.75514	0.0498261
Peak_08324	Griseorhodin A	0.0559828	C25H16O12	MRNNMFMPNANLHB-UHFFFAOYSA-N	Naphthalenes	Naphthalenes	Phytochemical.Oxyaromatic.Compound	3.429	509.128	0.378825	-1.4213	0.0100567
Peak_08626	LPA(24:4)	0.0084868	C27H47O7P		Glycerophosphates	LPA	Lipid	5.38326	515.322	0.553096	1.79341	0.0387816
Peak_08722	LPI(12:0)	0.0123103	C21H41O12P		Glycerophosphoinositols	LPI	Lipid	4.2065	517.254	0.483965	1.46571	0.00144618
Peak_08777	LPC(18:3(6Z,9Z,12Z))	0.0013785	C26H48NO7P		Glycerophosphocholines	LPC	Lipid	5.58531	518.326	0.675598	2.63685	0.023022
Peak_08836	Cucurbitacin F	0.0022543	C30H46O7	AOHIGMQGPFTKQX-QZPKXHNASA-N	Sterols	Cholesterols	Lipid	5.6188	519.33	0.684667	2.69338	0.026739
Peak_09731	LPG(20:2)	0.0129884	C26H49O9P		Glycerophosphoglycerols	LPG	Lipid	5.81088	537.306	0.454421	1.57755	0.0409467
Peak_09781	Phe-Trp-Trp	0.0286689	C31H31N5O4	MJOJSHOTYWABPR-WIRXVTQYSA-N	Amino acids and peptides	Tripeptides	Protein	3.32882	538.217	0.352522	1.0286	0.00829558
Peak_09786	PS(14:0/4:1)	0.0316199	C24H44NO10P		Glycerophosphoserines	PS	Lipid	5.81088	538.31	0.38254	1.58199	0.0390946
Peak_10202	Galactosyl-N-acetyllactosamine	0.0321035	C20H35NO16	DOTQRWNRHKNWIL-MOBJFDSMSA-N	Organooxygen compounds	Organooxygen compounds	Not.Matched	3.2281	546.236	0.615338	1.50522	0.00499718
Peak_10934	Azidopine	0.0017215	C27H26F3N5O5	SWMHKFTXBOJETC-UHFFFAOYSA-N	Benzenes	Trifluoromethylbenzenes	Protein	3.31204	558.198	0.644879	-1.27772	0.00281075
Peak_11592	Zeaxanthin	0.0110468	C40H56O2	JKQXZKUSFCKOGQ-QAYBQHTQSA-N	Isoprenoids	C40 isoprenoids	Lipid	7.31785	569.447	1.04314	1.89121	0.0146458
Peak_11828	PI(11:0/4:0)	0.0483193	C24H45O13P	KCIXHDKWRPJWEN-CGWKNTEDSA-N	Glycerophosphoinositols	PI	Lipid	2.54452	573.219	0.653686	2.19942	0.0073609
Peak_11899	MET-enkephalin	0.0094807	C27H35N5O7S	YFGBQHOOROIVKG-FKBYEOEOSA-N	Amino acids and peptides	Amino acids	Protein	2.54452	574.224	0.648725	2.24063	0.00772713
Peak_11950	LPGP(17:2)	0.0130292	C23H44O12P2		Glycerophosphoglycerols	LPGP	Lipid	2.56097	575.226	0.602134	2.21407	0.00729111
Peak_12210	Procyanidin B1	0.0038033	C30H26O12	XFZJEEAOWLFHDH-UKWJTHFESA-N	Flavonoids	Proanthocyanidins	Phytochemical.Oxyaromatic.Compound	2.64366	579.154	0.662517	2.23603	0.0174165
Peak_12211	Procyanidin B1	0.0019553	C30H26O12	XFZJEEAOWLFHDH-UKWJTHFESA-N	Flavonoids	Proanthocyanidins	Phytochemical.Oxyaromatic.Compound	2.97545	579.152	0.650273	1.33598	0.0418331
Peak_12272	Taurochenodeoxycholic acid 7-sulfate	0.104444	C26H45NO9S2	WTKQKSAFONWCMW-BJLOMENOSA-N	Bile acids	C24 bile acids	Lipid	2.64366	580.157	0.607826	2.28956	0.0170721
Peak_12331	Carlinoside	0.0072662	C26H28O15	XBGYTZHKGMCEGE-VYUBKLCTSA-N	Flavonoids	Flavonoid glycosides	Phytochemical.Oxyaromatic.Compound	2.66033	581.158	0.511189	1.21445	0.0160274
Peak_13487	PI(13:0/4:1)	0.224736	C26H47O13P		Glycerophosphoinositols	PI	Lipid	0.830715	599.059	0.23471	1.25995	0.00138977
Peak_13490	PI(13:0/4:1)	0.178314	C26H47O13P		Glycerophosphoinositols	PI	Lipid	0.813994	599.105	0.567036	1.4111	0.00200688
Peak_13497	PI(13:0/4:1)	0.112234	C26H47O13P		Glycerophosphoinositols	PI	Lipid	0.713649	599.171	0.535039	1.08826	0.00999765
Peak_13500	PI(13:0/4:1)	0.0913186	C26H47O13P		Glycerophosphoinositols	PI	Lipid	0.713649	599.192	0.912597	1.01221	0.0144839
Peak_13564	Delphinine	0.146628	C33H45NO9	REVYTWNGZDPRKE-DBMGXYMYSA-N	Isoprenoids	C20 isoprenoids	Lipid	0.713649	600.171	0.463093	1.09193	0.0117612
Peak_14009	LPGP(19:0)	0.0076717	C25H52O12P2		Glycerophosphoglycerols	LPGP	Lipid	7.63662	607.294	0.798483	1.48448	0.0387141
Peak_14071	Chymostatin	0.0218638	C31H41N7O6	MRXDGVXSWIXTQL-HYHFHBMOSA-N	Amino acids and peptides	Dipeptides	Protein	7.63662	608.298	0.788647	1.42794	0.0404858
Peak_14133	Gyrocarpine	0.0026448	C37H40N2O6	VXPVPAHQYCJDTP-UHFFFAOYSA-N	Lignans	Lignans	Phytochemical.Oxyaromatic.Compound	7.63662	609.299	0.791732	1.37668	0.0412895
Peak_14201	Tubocurarine	0.0006901	C37H41N2O6	JFJZZMVDLULRGK-URLMMPGGSA-O	Organooxygen compounds	Ethers	Phytochemical.Oxyaromatic.Compound	7.63662	610.304	0.830748	1.38453	0.041234
Peak_14279	PI(14:1/4:1)	0.0222234	C27H47O13P		Glycerophosphoinositols	PI	Lipid	7.65303	611.306	0.555314	1.40943	0.0294473
Peak_14416	Oxidized glutathione	0.0229896	C20H32N6O12S2	YPZRWBKMTBYPTK-BJDJZHNGSA-N	Amino acids and peptides	Peptides	Protein	0.746939	613.183	0.246427	-1.56649	0.0014759
Peak_14486	6'''-Oxoneomycin C	0.104792	C23H43N5O14	ISQZALIQHGXYSL-VZXHOKRSSA-N	Aminosaccharides	Amino sugars	Protein	0.730278	614.184	0.274104	-1.00722	0.00475243
Peak_14680	Heme	0.0036771	C34H32FeN4O4	KABFMIBPWCXCRK-RGGAHWMASA-L	Metallotetrapyrroles	Metalloporphyrins	Phytochemical.Oxyaromatic.Compound	2.80808	617.189	0.25221	2.05989	0.0237928
Peak_14935	Lanceotoxin A	0.0193731	C32H44O12	IDZGCABQJKWSHL-GSMIIGJLSA-N	Sterols	Bufanolides	Lipid	7.2336	621.272	0.77214	2.30961	0.0371652
Peak_14997	Benzyloxycarbonylarginyl-arginine 4-methylcoumarin-7-ylamide	0.0341544	C30H39N9O6	MPTXQKPPFWMRPT-GOTSBHOMSA-N	Amino acids and peptides	Amino acids	Protein	7.2336	622.276	0.780797	2.30018	0.0368434
Peak_15075	Thalmidine	0.0338591	C38H42N2O6	UUURWWVPMHAACP-KYJUHHDHSA-N	Lignans	Lignans	Phytochemical.Oxyaromatic.Compound	7.16615	623.278	0.736555	2.29942	0.0361016
Peak_15256	11-trans-LTC4	0.100637	C30H47N3O9S	GWNVDXQDILPJIG-CCHJCNDSSA-N	Eicosanoids	Leukotrienes	Lipid	2.82471	626.211	0.437712	-1.28679	0.0150486
Peak_15453	Primary fluorescent chlorophyll catabolite	0.0219571	C35H40N4O7	ULSSSZOYSMVFIJ-NPQUFKRBSA-N	Tetrapyrroles	Tetrapyrroles	Phytochemical.Oxyaromatic.Compound	7.65303	629.276	0.478837	1.51607	0.0194824
Peak_15989	PS(22:6/4:1)	0.0345202	C32H48NO10P		Glycerophosphoserines	PS	Lipid	7.65303	638.275	0.656934	1.87857	0.0220276
Peak_16049	LPIP(O-16:0)	0.0078258	C25H52O14P2		Glycerophosphoinositols	O-LPIP	Lipid	7.65303	639.283	0.761374	1.71502	0.0290613
Peak_16052	PI(16:1/4:1)	0.0041259	C29H51O13P		Glycerophosphoinositols	PI	Lipid	7.71981	639.311	0.559679	1.38341	0.00981974
Peak_16115	Protorifamycin I	0.0259373	C35H45NO10	DWSNNJANRGBGNU-SMGNAMCTSA-N	Macrolides and analogues	Macrolactams	Phytochemical.Oxyaromatic.Compound	7.65303	640.286	0.63897	1.58582	0.0295403
Peak_16451	Coenzyme F420-1	0.0406972	C24H29N4O15P	WVEYWCGUSMKKMF-LADHFWMSSA-N	Amino acids and peptides	Amino acids	Not.Matched	2.66033	645.185	0.484909	1.3103	0.0334042
Peak_16512	Cefoperazone	0.0385128	C25H27N9O8S2	GCFBRXLSHGKWDP-WTKTZPJXSA-N	Beta lactams	Cephalosporins	Protein	2.67693	646.189	0.489354	1.31504	0.0357508
Peak_16758	PS(10:0_16:1)	0.194294	C32H60NO10P		Glycerophosphoserines	PS	Lipid	0.813994	650.209	0.394188	-1.00862	0.0404572
Peak_17075	Coproporphyrin I	0.0009631	C36H38N4O8	VORBHEGMEBOMMB-JRHDEHKPSA-N	Porphyrins	Porphyrins	Phytochemical.Oxyaromatic.Compound	7.63662	655.278	0.835757	1.67589	0.0352325
Peak_17150	Rifamycin W	0.0245939	C35H45NO11	PHKOJKSYBBXXED-OCENJLCRSA-N	Macrolides and analogues	Macrolactams	Phytochemical.Oxyaromatic.Compound	7.65303	656.283	0.763086	1.69542	0.033465
Peak_17222	Hellicoside	0.0163736	C29H36O17	IKASMYQBXBUEQS-AEAUTZEXSA-N	Hydroxycinnamic acids	Coumaric acids	Phytochemical.Oxyaromatic.Compound	3.80403	657.22	0.465786	2.13936	0.00709683
Peak_17387	PG(10:0_18:4)	0.0270821	C34H59O10P		Glycerophosphoglycerols	PG	Lipid	5.38326	659.366	0.601398	1.86991	0.0361523
Peak_17452	Taurolithocholic acid 3-glucuronide	0.0277874	C32H53NO11S	YRKZDONPVFEWNN-HBCPYPPXSA-N	Bile acids	C24 bile acids	Lipid	5.40005	660.37	0.446796	1.72364	0.0455683
Peak_17557	Streptomycin 6-phosphate	0.0158333	C21H40N7O15P	BWVNOTYEDMJNDA-TWBNDLJKSA-N	Organooxygen compounds	Organooxygen compounds	Protein	4.18974	662.224	0.454214	-1.06048	0.00215853
Peak_18509	LPGP(24:0)	0.0027528	C30H62O12P2		Glycerophosphoglycerols	LPGP	Lipid	5.38326	677.377	0.578805	1.78431	0.0372288
Peak_18519	LPGP(24:0)	0.0223853	C30H62O12P2		Glycerophosphoglycerols	LPGP	Lipid	5.40636	677.402	0.535783	1.55451	0.0412352
Peak_18572	PS(10:0_18:1)	0.0546049	C34H64NO10P		Glycerophosphoserines	PS	Lipid	5.40005	678.38	0.471443	1.66335	0.0488633
Peak_19474	Fumonisin C2	0.165459	C33H57NO14	QYKFBSMPFHDZBZ-SOBJHFRFSA-N	Sphingoid bases	Sphingoid base analogs	Lipid	3.80403	692.22	0.324062	-1.00107	0.0096911
Peak_19603	PI-Cer(d14:1/14:1)	0.139824	C34H64NO11P		Phosphosphingolipids	PI-Cer	Lipid	7.65303	694.29	0.660103	2.00888	0.0234404
Peak_19667	LPIP(19:0)	0.0221081	C28H56O15P2		Glycerophosphoinositols	LPIP	Lipid	3.44579	695.295	0.426178	1.78761	0.0100028
Peak_19925	PI(10:0_14:0)	0.0510731	C33H63O13P		Glycerophosphoinositols	PI	Lipid	5.38326	699.358	0.496649	1.68564	0.0265543
Peak_19932	PI(10:0_14:0)	0.0075945	C33H63O13P		Glycerophosphoinositols	PI	Lipid	5.40636	699.401	0.380075	1.42884	0.0432818
Peak_19989	Lasiodine A	0.0093429	C39H49N5O7	HXLYZPGZSZWTSW-ISFPBDNKSA-N	Amino acids and peptides	Amino acids	Protein	5.38326	700.362	0.564751	1.73071	0.0283169
Peak_20280	Cer(d14:2/32:0)	0.0489348	C46H89NO3		Ceramides	Cer	Lipid	0.713649	704.741	0.731597	-1.06196	0.001404
Peak_20566	Sanggenon C	0.0270009	C40H36O12	XETHJOZXBVWLLM-BQXUNMGUSA-N	Diarylheptanoids	Linear diarylheptanoids	Phytochemical.Oxyaromatic.Compound	2.51112	709.202	0.310674	2.44691	0.0120625
Peak_22612	LPIP2(17:2)	0.0199432	C26H49O18P3		Glycerophosphoinositols	LPIP2	Not.Matched	4.2065	743.201	1.17931	1.49608	0.0251463
Peak_22742	LPIP2(17:1)	0.0482274	C26H51O18P3		Glycerophosphoinositols	LPIP2	Not.Matched	0.697057	745.189	0.263608	-1.00087	0.00323409
Peak_22801	NADPH	0.0945394	C21H30N7O17P3	ACFIXJIJDZMPPO-NNYOXOHSSA-N	Nicotinamides	Nicotinamide dinucleotides	Protein	0.697057	746.194	0.542184	-1.19751	0.00539006
Peak_23445	LPIP3(12:0)	0.0405445	C21H44O21P4		Glycerophosphoinositols	LPIP3	Carbohydrate	3.05839	757.181	0.82191	-1.25275	0.00237208
Peak_23581	LPIP2(18:1)	0.0312908	C27H53O18P3		Glycerophosphoinositols	LPIP2	Not.Matched	2.85808	759.221	0.229961	-1.13982	0.0174201
Peak_23638	PS(P-36:8)/PS(O-36:9)	0.252756	C42H66NO9P		Glycerophosphoserines	O-PS	Lipid	2.89166	760.203	0.240323	-1.07127	0.00965707
Peak_24287	LPIP3(O-14:0)	0.0453408	C23H50O20P4		Glycerophosphoinositols	LPIP3	Carbohydrate	3.10775	771.238	0.423169	-1.14168	0.00140921
Peak_24337	Leucomycin a5	0.20832	C39H65NO14	JZVYPSLDMXOITF-MJRCUCNNSA-N	Macrolides and analogues	Macrolides	Lipid	3.10775	772.24	0.381341	-1.0477	0.0013559
Peak_24664	DG(14:1_33:0)	0.0146099	C50H96O5		Diradylglycerols	DAG	Lipid	3.82081	777.719	0.457922	1.20554	0.0063669
Peak_24727	PE(P-18:1/22:4)/PE(O-18:2/22:4)	0.0035037	C45H80NO7P		Glycerophosphoethanolamines	O-PE	Lipid	11.0377	778.572	0.883818	-1.12849	0.00201917
Peak_24762	LPIP2(20:5)	0.0333627	C29H49O18P3		Glycerophosphoinositols	LPIP2	Not.Matched	3.78724	779.255	0.459282	1.14472	0.00465972
Peak_24862	PC(P-17:0/20:4)/PC(O-17:1/20:4)	0.0030327	C45H82NO7P		Glycerophosphocholines	O-PC	Lipid	6.66165	780.594	0.928587	1.08523	0.0397669
Peak_24896	LPIP2(20:4)	0.0382214	C29H51O18P3		Glycerophosphoinositols	LPIP2	Not.Matched	3.80403	781.275	0.481109	2.36206	0.00503137
Peak_24959	PI-Cer(d15:2/20:5)	0.184639	C41H68NO11P		Phosphosphingolipids	PI-Cer	Lipid	3.80403	782.276	0.532652	2.37765	0.00535616
Peak_25091	PI-Cer(d15:1/20:5)	0.245231	C41H70NO11P		Phosphosphingolipids	PI-Cer	Lipid	0.646968	784.231	0.32489	-1.23968	0.00203371
Peak_25142	LPIP2(20:2)	0.0314833	C29H55O18P3		Glycerophosphoinositols	LPIP2	Not.Matched	0.713649	785.237	0.314939	-1.0899	0.00220922
Peak_25265	LPIP2(20:1)	0.0517415	C29H57O18P3		Glycerophosphoinositols	LPIP2	Not.Matched	2.85808	787.232	0.230124	-1.01454	0.0050453
Peak_26151	PS(15:0_22:2)	0.0036116	C43H80NO10P		Glycerophosphoserines	PS	Lipid	6.64486	802.564	0.579716	1.73782	0.0339623
Peak_26182	LPIP2(21:0)	0.058301	C30H61O18P3		Glycerophosphoinositols	LPIP2	Lipid	3.78724	803.257	0.506033	2.46822	0.00147579
Peak_26975	LPIP2(22:0)	0.0413351	C31H63O18P3		Glycerophosphoinositols	LPIP2	Lipid	3.82081	817.289	0.547795	1.45613	0.00211863
Peak_27770	Premithramycin A3	0.0569637	C41H52O18	NVPFAZNHCJWHCL-JUEXJKKASA-N	Naphthalenes	Naphthols	Phytochemical.Oxyaromatic.Compound	3.97175	833.266	0.203663	1.26128	0.00150856
Peak_30762	PI(17:1_22:6)	0.0296569	C48H79O13P		Glycerophosphoinositols	PI	Lipid	6.56073	895.504	0.565059	2.24366	0.0484834
Peak_31767	alpha-Amanitin	0.0578099	C39H54N10O14S	CIORWBWIBBPXCG-SXZCQOKQSA-N	Amino acids and peptides	Amino acids	Protein	3.92148	919.304	0.588796	1.25571	0.00540309
Peak_31802	2E-Decenoyl-CoA	0.0681406	C31H52N7O17P3S	MGNBGCRQQFMNBM-YJHHLLFWSA-N	Fatty esters	Acyl CoAs	Protein	3.92148	920.311	0.417312	1.43721	0.00321246
Peak_32336	Dimethylnonanoyl-CoA	0.026583	C32H56N7O17P3S		Fatty esters	Acyl CoAs	Protein	3.80403	936.301	0.275196	1.28402	0.00505745
Peak_32376	PI(18:3_24:4)	0.196774	C51H85O13P		Glycerophosphoinositols	PI	Lipid	4.22323	937.384	0.535654	1.02668	0.021178
Peak_32519	PI(18:1_24:4)	0.325103	C51H89O13P		Glycerophosphoinositols	PI	Lipid	3.93826	941.287	0.428299	1.27182	0.000925371
Peak_32556	DG(O-60:3)	0.363501	C63H120O4		Diradylglycerols	O-DAG	Lipid	3.93826	942.29	0.251866	1.31603	0.00129648
Peak_32632	PI(16:1_26:2)	0.322301	C51H93O13P		Glycerophosphoinositols	PI	Lipid	4.32389	945.321	0.420639	1.1324	0.00190838
Peak_32926	Hex2Cer(d15:2/26:2)	0.345276	C53H95NO13		Glycosphingolipids	LacCer	Lipid	3.88795	954.343	0.562237	1.44777	0.00429618
Peak_32953	Cobalt-precorrin-6B	0.0388748	C44H55CoN4O16	RFBIUXAOZAPWCC-RDKWKEIWSA-M	Corrinoids	Corrinoids	Phytochemical.Oxyaromatic.Compound	3.88795	955.341	0.636368	1.33631	0.00555976
Peak_33073	DG(O-22:1_39:0)	0.326425	C64H126O4		Diradylglycerols	O-DAG	Lipid	3.92148	960.3	0.220167	1.02889	0.0012093
Peak_33502	DGDG(17:2_22:6)	0.314148	C54H86O15		Glycosyldiradylglycerols	DGDG	Lipid	3.80403	975.291	0.280732	1.19388	0.00132618
Peak_33506	DGDG(17:2_22:6)	0.280216	C54H86O15		Glycosyldiradylglycerols	DGDG	Lipid	3.92148	975.324	0.436905	1.52933	0.000972368
Peak_33508	DGDG(17:2_22:6)	0.252053	C54H86O15		Glycosyldiradylglycerols	DGDG	Lipid	3.80403	975.353	0.602711	1.40391	0.00136894
Peak_33538	11E-Tetradecenoyl-CoA	0.010147	C35H60N7O17P3S	WFGNMSCJASVFQK-XNKJMYHLSA-N	Fatty esters	Acyl CoAs	Protein	3.80403	976.296	0.277972	1.13703	0.000940412
Peak_33541	trans-Tetradec-2-enoyl-CoA	0.0194381	C35H60N7O17P3S	MBCVYCOKMMMWLX-YYMFEJJQSA-N	Fatty esters	Acyl CoAs	Protein	3.97175	976.325	0.346017	1.43801	0.00121861
Peak_33564	DGDG(17:1_22:6)	0.32075	C54H88O15		Glycosyldiradylglycerols	DGDG	Lipid	3.80403	977.3	0.337223	1.09905	0.00101265

## Sheet: nb_nc_y
Supplementary Table S1: Significance of the different mass features over various treatments. The data are shown separately for negative and positive mode. The significantly modified metabolites for each treatment are given on the separate sheets. The raw data is given in the Supplementary Table S5
Name: Putative annotation as shown in Supplementary Table S6
RT min: retention time
m.z: mass-to-charge ratio
VIP score: variable influence on projection
adj p: FDR adjusted P value (significance P< 0.005)
NA: not available
negative
NA
positive
Peak #	Name	Annotation error	Formula	inchi key	Main group	Sub group	Compound Match	RT Min	m.z	VIP score	log2fold change	adj p
Peak_01270	4-Fluoro-3-phenoxybenzoic acid	0.0043002	C13H9FO3	VLXNXMTVRWIUJZ-UHFFFAOYSA-N	Benzenes	Diphenylethers	Phytochemical.Oxyaromatic.Compound	0.963913	233.066	0.889809	1.08469	0.043175
Peak_12763	PS(22:4)	0.10177	C28H46NO10P		Glycerophosphoserines	PS	Lipid	2.99224	588.192	0.765111	1.01712	0.0333749
Peak_24303	MGDG(18:4_18:4)	0.0024948	C45H70O10		Glycosyldiradylglycerols	MGDG	Lipid	6.62798	771.502	0.626795	1.07077	0.0274951

## Sheet: mb_mc_o
Supplementary Table S1: Significance of the different mass features over various treatments. The data are shown separately for negative and positive mode. The significantly modified metabolites for each treatment are given on the separate sheets. The raw data is given in the Supplementary Table S5
Name: Putative annotation as shown in Supplementary Table S6
RT min: retention time
m.z: mass-to-charge ratio
VIP score: variable influence on projection
adj p: FDR adjusted P value (significance P< 0.005)
negative
Peak #	Name	Annotation error	Formula	inchi key	Main group	Sub group	Compound Match	RT Min	m.z	VIP score	log2fold change	adj p
Peak_01504	Gly-Phe-Trp	0.000244	C22H24N4O4	NZOAFWHVAFJERA-OALUTQOASA-N	Amino acids and peptides	Tripeptides	Protein	4.121	407.172	0.845372	1.22625	0.00675321
Peak_01519	Asn-Met-Phe	0.001393	C18H26N4O5S	RLHANKIRBONJBK-IHRRRGAJSA-N	Amino acids and peptides	Tripeptides	Protein	3.5	409.153	0.846231	1.53747	0.00748059
Peak_02272	PG(10:0/4:0)	0.008912	C20H39O10P	WGKUGNWPOKJWRF-ZWKOTPCHSA-N	Glycerophosphoglycerols	PG	Lipid	3.819	469.229	1.02666	1.1593	0.0167524
Peak_02473	LPA(22:5)	0.006	C25H41O7P		Glycerophosphates	LPA	Lipid	4.272	483.245	0.55869	-1.62419	0.0254019
Peak_02774	LPA(24:5)	0.0063	C27H45O7P		Glycerophosphates	LPA	Lipid	4.419	511.276	0.911047	1.14348	0.00560247
Peak_17360	PI(18:3_24:4)	0.229783	C51H85O13P		Glycerophosphoinositols	PI	Lipid	4.188	935.335	0.457642	1.26876	0.000427345
Peak_17398	3-Hydroxydecanoyl-CoA	0.1001	C31H54N7O18P3S	HIVSMYZAMUNFKZ-PNPVFPMQSA-N	Fatty esters	Acyl CoAs	Protein	4.205	936.338	0.303298	1.14578	0.00208022
positive
Peak #	Name	Annotation error	Formula	inchi key	Main group	Sub group	Compound Match	RT Min	m.z	VIP score	log2fold change	adj p
Peak_02096	Salicin	0.00223	C13H18O7	NGFMICBWJRZIBI-UJPOAAIJSA-N	Glycosyl compounds	O-glycosyl compounds	Lipid	1.2761	287.111	0.448805	1.74618	2.1205e-05
Peak_02124	Orotidine	0.0023632	C10H12N2O8	FKCRAVPPBFWEJD-XVFCMESISA-N	Glycosyl compounds	Glycosylamines	Not.Matched	0.730278	289.065	0.868213	1.00953	0.0223893
Peak_02125	Orotidine	0.0048559	C10H12N2O8	FKCRAVPPBFWEJD-XVFCMESISA-N	Glycosyl compounds	Glycosylamines	Not.Matched	0.930396	289.063	0.47865	1.21928	0.000614664
Peak_02391	Haematoxylin	0.0020328	C16H14O6	WZUVPPKBWHMQCE-XJKSGUPXSA-N	Flavonoids	Neoflavonoids	Phytochemical.Oxyaromatic.Compound	1.28205	303.085	0.187842	1.5187	6.18835e-05
Peak_05440	Apigenin-7-O-glucoside	0.0268297	C21H20O10	KMOUJOKENFFTPU-HXBJIUPGSA-N	Flavonoids	Flavonoid glycosides	Phytochemical.Oxyaromatic.Compound	3.68889	433.141	1.39866	1.84535	0.023131
Peak_17604	LPIP2(11:0)	0.0355896	C20H41O18P3		Glycerophosphoinositols	LPIP2	Carbohydrate	3.05839	663.194	0.840584	1.05409	0.0234353

## Sheet: mb_nb_o
Supplementary Table S1: Significance of the different mass features over various treatments. The data are shown separately for negative and positive mode. The significantly modified metabolites for each treatment are given on the separate sheets. The raw data is given in the Supplementary Table S5
Name: Putative annotation as shown in Supplementary Table S6
RT min: retention time
m.z: mass-to-charge ratio
VIP score: variable influence on projection
adj p: FDR adjusted P value (significance P< 0.005)
negative
Peak #	Name	Annotation error	Formula	inchi key	Main group	Sub group	Compound Match	RT Min	m.z	VIP score	log2fold change	adj p
Peak_03319	Protoaphin aglucone	0.007162	C30H28O11	KLZOEWZFKUESNU-UYFDZFGUSA-N	Arylnaphthalene lignans	Arylnaphthalene lignans	Phytochemical.Oxyaromatic.Compound	0.766	563.148	0.400066	1.13849	0.00936227
Peak_04166	CMP-N-glycoloylneuraminate	0.038818	C20H31N4O17P	AOOQVSNKZOZOHI-LBTQWYOJSA-N	Pyrimidines	Pyrimidine deoxyribonucleoside monophosphates	Not.Matched	3.198	629.173	0.651771	1.48843	0.0112097
Peak_04258	PS(22:6/4:1)	0.127587	C32H48NO10P		Glycerophosphoserines	PS	Lipid	2.792	636.166	0.468857	-1.12349	0.00859029
Peak_05568	Azadirachtin A	0.069941	C35H44O16	FTNJWQUOZFUQQJ-NDAWSKJSSA-N	Isoprenoids	C30 isoprenoids	Phytochemical.Oxyaromatic.Compound	3.701	719.185	0.554837	-2.83339	0.00924683
Peak_08852	LPIP3(O-16:1)	0.040748	C25H52O20P4		Glycerophosphoinositols	LPIP3	Carbohydrate	4.104	795.233	0.748185	-1.01858	0.0370333
Peak_15664	Chlorophyll B	0.242578	C55H70MgN4O6	NSMUHPMZFPKNMZ-IOBBVUIDSA-M	Chlorins	Chlorins	Phytochemical.Oxyaromatic.Compound	0.766	905.264	0.480268	1.11327	0.00767913
Peak_18925	Mycothione	0.02624	C34H58N4O24S2	YKSIHFDRGQQOCJ-LHHMOHDTSA-N	Organooxygen compounds	Organooxygen compounds	Amino.Sugar	2.997	969.254	0.594945	-1.69842	0.03902
Positive
Peak #	Name	Annotation error	Formula	inchi key	Main group	Sub group	Compound Match	RT Min	m.z	VIP score	log2fold change	adj p
Peak_01303	Heptyl 4-hydroxybenzoate	0.0001967	C14H20O3	ZTJORNVITHUQJA-UHFFFAOYSA-N	Benzoic acids	p-Hydroxybenzoic acid alkyl esters	Lipid	7.48574	237.149	0.507916	-1.23208	0.0188363
Peak_01453	sn-Glycero-3-phosphoglycerol	0.0130376	C6H15O8P	LLCSXHMJULHSJN-OLQVQODUSA-N	Organic phosphoric acids	Organic phosphoric acids	Carbohydrate	0.730278	247.045	0.726169	1.87776	0.000217049
Peak_01665	Mannitol 1-phosphate	0.0355626	C6H15O9P	GACTWZZMVMUKNG-KVTDHHQDSA-N	Monosaccharides	Monosaccharide phosphates	Carbohydrate	0.713649	263.018	0.52275	3.99124	0.000235143
Peak_02390	Neostigmine bromide	0.0023552	C12H19BrN2O2	LULNWZDBKTWDGK-UHFFFAOYSA-M	Benzenes	Benzenes	Protein	0.730278	303.069	0.377065	1.34221	0.000262216
Peak_02422	Taxifolin	0.0022651	C15H12O7	CXQWRCVTCMQVQX-LSDHHAIUSA-N	Flavonoids	Flavanonols	Phytochemical.Oxyaromatic.Compound	2.92523	305.064	0.745138	-1.14499	0.00148306
Peak_02602	Jatrophatrione	3.59e-05	C20H26O3	TYBGBKQPLBAYQG-CJIMKZOCSA-N	Isoprenoids	C20 isoprenoids	Phytochemical.Oxyaromatic.Compound	7.06506	315.196	0.599173	1.34141	0.0179882
Peak_02610	Cys-Gly-His	0.0256321	C11H17N5O4S	RWAZRMXTVSIVJR-YUMQZZPRSA-N	Amino acids and peptides	Tripeptides	Protein	0.730278	316.082	0.669046	2.05017	0.00153238
Peak_04214	5,7,2'-Trihydroxy-3,6,4',5'-tetramethoxyflavone	0.0034164	C19H18O9	YEALILHFFIHIQL-UHFFFAOYSA-N	Flavonoids	Flavones and Flavonols	Phytochemical.Oxyaromatic.Compound	0.713649	391.107	0.610633	2.8547	0.000129333
Peak_04383	Iodoquinol	0.0990127	C9H5I2NO	UXZFQZANDVDGMM-UHFFFAOYSA-N	Haloquinolines	Haloquinolines	Phytochemical.Oxyaromatic.Compound	11.0703	397.755	0.808959	-1.17288	0.0471144
Peak_04656	Nandrolone phenpropionate	5.53e-05	C27H34O3	UBWXUGDQUBIEIZ-QNTYDACNSA-N	Steroids	C18 steroids	Phytochemical.Oxyaromatic.Compound	7.48574	407.259	0.453947	-1.22413	0.0295274
Peak_04898	Cys-Met-Tyr	0.016949	C17H25N3O5S2	CYHMMWIOEUVHHZ-IHRRRGAJSA-N	Amino acids and peptides	Tripeptides	Protein	2.51112	416.115	0.75443	-1.3107	0.0471304
Peak_06046	Exserohilone	0.0495651	C20H22N2O6S2	FWPMSYUTOOUASJ-GFIYPFTLSA-N	Indoles	Indoles	Phytochemical.Oxyaromatic.Compound	0.797242	451.05	0.543861	2.61883	0.00438604
Peak_06546	Delphinidin 3-O-beta-D-glucoside	0.0309789	C21H21O12	XENHPQQLDPAYIJ-PEVLUNPASA-O	Flavonoids	Flavonoid glycosides	Phytochemical.Oxyaromatic.Compound	0.730278	466.142	0.604422	1.24584	0.00138207
Peak_06567	Cer(d14:1/15:1)	0.217081	C29H55NO3		Ceramides	Cer	Lipid	0.730278	466.643	0.351627	1.03029	0.000693174
Peak_06595	LPG(P-16:1)/LPG(O-16:2)	0.0024373	C22H43O8P		Glycerophosphoglycerols	O-LPG	Lipid	7.48574	467.28	0.654605	-1.01954	0.0385822
Peak_06838	CMP-2-trimethylaminoethylphosphonate	0.0067152	C14H27N4O10P2	RNUGPSIGKYHQNQ-OJAKKHQRSA-O	Monosaccharides	Pentose phosphates	Protein	0.730278	474.122	0.722344	1.49933	0.000182363
Peak_12479	Deinoxanthin	0.0010884	C40H54O3	GJFBHWJTMDTLNX-UWCSZFODSA-N	Isoprenoids	C40 isoprenoids	Lipid	6.20811	583.416	0.543895	-1.66169	0.0355875
Peak_12545	CerP(d14:0/18:4)	0.011442	C32H58NO6P		Ceramides	Cer-1-P	Lipid	6.22491	584.42	0.54439	-1.81165	0.0245451
Peak_12610	Capsanthin	0.0088475	C40H56O3	VYIRVAXUEZSDNC-RDJLEWNRSA-N	Isoprenoids	C40 isoprenoids	Lipid	6.24169	585.422	0.384117	-1.59811	0.0404325
Peak_13584	LPC(24:4)	0.009511	C32H58NO7P		Glycerophosphocholines	LPC	Lipid	5.99022	600.413	0.612158	-1.26396	0.0220849
Peak_14575	LPG(26:5)	0.0082121	C32H55O9P		Glycerophosphoglycerols	LPG	Lipid	6.37596	615.375	1.05944	1.52962	0.0489809
Peak_16938	Esmeraldin B	0.0325437	C38H28N4O7	UFEIYIBAKOKKBK-UHFFFAOYSA-N	Organonitrogen compounds	Amines	Phytochemical.Oxyaromatic.Compound	3.17775	653.171	0.392435	1.77508	0.00135044
Peak_23447	LPIP2(18:2)	0.0384676	C27H51O18P3		Glycerophosphoinositols	LPIP2	Not.Matched	3.87118	757.198	0.753576	2.16439	0.0012486
Peak_28200	PI(P-16:0/20:5)/PI(O-16:1/20:5)	0.0179656	C45H77O12P		Glycerophosphoinositols	O-PI	Lipid	6.37596	841.541	1.11374	1.82177	0.049491

## Sheet: mc_nc_o
Supplementary Table S1: Significance of the different mass features over various treatments. The data are shown separately for negative and positive mode. The significantly modified metabolites for each treatment are given on the separate sheets. The raw data is given in the Supplementary Table S5
Name: Putative annotation as shown in Supplementary Table S6
RT min: retention time
m.z: mass-to-charge ratio
VIP score: variable influence on projection
adj p: FDR adjusted P value (significance P< 0.005)
negative
Peak #	Name	Annotation error	Formula	inchi key	Main group	Sub group	Compound Match	RT Min	m.z	VIP score	log2fold change	adj p
Peak_01616	Trehalose 6-phosphate	0.071542	C12H23O14P	LABSPYBHMPDTEL-LIZSDCNHSA-N	Monosaccharides	Monosaccharide phosphates	Carbohydrate	0.816	421.003	0.505505	1.15447	0.0325146
Peak_03732	IACI	0.019906	C26H27IN6O3	VWFWJPJMAFRNET-MQWMPURMSA-N	Aromatic heteropolycyclic compounds	Cinchona alkaloids	Not.Matched	2.675	595.131	0.837968	1.01456	0.00852847
Peak_04438	Esmeraldin B	0.024799	C38H28N4O7	UFEIYIBAKOKKBK-UHFFFAOYSA-N	Organonitrogen compounds	Amines	Phytochemical.Oxyaromatic.Compound	2.963	651.163	0.675554	1.15641	0.0496619
Peak_04689	LPIP(18:4)	0.090201	C27H46O15P2		Glycerophosphoinositols	LPIP	Lipid	2.396	671.133	0.503726	1.04421	0.0378411
Peak_05568	Azadirachtin A	0.069941	C35H44O16	FTNJWQUOZFUQQJ-NDAWSKJSSA-N	Isoprenoids	C30 isoprenoids	Phytochemical.Oxyaromatic.Compound	3.701	719.185	0.868578	-1.40013	0.023605
positive
Peak #	Name	Annotation error	Formula	inchi key	Main group	Sub group	Compound Match	RT Min	m.z	VIP score	log2fold change	adj p
Peak_01453	sn-Glycero-3-phosphoglycerol	0.0130376	C6H15O8P	LLCSXHMJULHSJN-OLQVQODUSA-N	Organic phosphoric acids	Organic phosphoric acids	Carbohydrate	0.730278	247.045	0.47358	1.78554	0.0123268
Peak_01665	Mannitol 1-phosphate	0.0355626	C6H15O9P	GACTWZZMVMUKNG-KVTDHHQDSA-N	Monosaccharides	Monosaccharide phosphates	Carbohydrate	0.713649	263.018	0.817336	3.26108	0.0143885
Peak_02610	Cys-Gly-His	0.0256321	C11H17N5O4S	RWAZRMXTVSIVJR-YUMQZZPRSA-N	Amino acids and peptides	Tripeptides	Protein	0.730278	316.082	0.95858	2.23092	0.0128046
Peak_04214	5,7,2'-Trihydroxy-3,6,4',5'-tetramethoxyflavone	0.0034164	C19H18O9	YEALILHFFIHIQL-UHFFFAOYSA-N	Flavonoids	Flavones and Flavonols	Phytochemical.Oxyaromatic.Compound	0.713649	391.107	0.645571	2.11493	0.0131988
Peak_06838	CMP-2-trimethylaminoethylphosphonate	0.0067152	C14H27N4O10P2	RNUGPSIGKYHQNQ-OJAKKHQRSA-O	Monosaccharides	Pentose phosphates	Protein	0.730278	474.122	1.38706	1.5022	0.00793832
Peak_11327	Theaflavin	0.0142333	C29H24O12	MKTFRRIBCBTOKJ-CRFHJIRQSA-N	Flavonoids	Hydroxyflavonoids	Phytochemical.Oxyaromatic.Compound	3.52972	565.121	1.15543	1.43506	0.0209956
Peak_19723	PI-Cer(d14:2/13:0(OH))	0.158228	C33H62NO12P		Phosphosphingolipids	PI-Cer	Lipid	0.913642	696.251	0.633561	-1.07474	0.00619021
Peak_19761	Cer(d18:0/26:0(OH))	0.073008	C44H89NO4		Ceramides	DHCer	Lipid	0.897183	696.76	0.576368	-1.30593	0.00410634
Peak_29773	DGDG(11:0_20:3)	0.0024487	C46H80O15		Glycosyldiradylglycerols	DGDG	Lipid	6.81278	873.56	1.11031	-1.59117	0.0161606
Peak_29786	PI(O-14:0/24:4)	0.0008241	C47H85O12P		Glycerophosphoinositols	O-PI	Lipid	6.93062	873.585	1.00561	-1.17713	0.0489626

## Sheet: nb_nc_o
Supplementary Table S1: Significance of the different mass features over various treatments. The data are shown separately for negative and positive mode. The significantly modified metabolites for each treatment are given on the separate sheets. The raw data is given in the Supplementary Table S5
Name: Putative annotation as shown in Supplementary Table S6
RT min: retention time
m.z: mass-to-charge ratio
VIP score: variable influence on projection
adj p: FDR adjusted P value (significance P< 0.005)
negative
Peak #	Name	Annotation error	Formula	inchi key	Main group	Sub group	Compound Match	RT Min	m.z	VIP score	log2fold change	adj p
Peak_00412	Homocystine	0.003852	C8H16N2O4S2	ZTVZLYBCZNMWCF-ZBHICJROSA-N	Amino acids and peptides	Amino acids	Protein	2.963	267.051	0.417582	1.00548	0.00841936
Peak_02272	PG(10:0/4:0)	0.008912	C20H39O10P	WGKUGNWPOKJWRF-ZWKOTPCHSA-N	Glycerophosphoglycerols	PG	Lipid	3.819	469.229	0.390949	1.33221	0.00216839
Peak_02472	LPA(22:5)	0.006	C25H41O7P		Glycerophosphates	LPA	Lipid	3.953	483.245	0.701403	1.85177	0.00236151
Peak_02774	LPA(24:5)	0.0063	C27H45O7P		Glycerophosphates	LPA	Lipid	4.419	511.276	0.646834	1.06037	0.0021884
Peak_03524	Carlinoside	0.000175	C26H28O15	XBGYTZHKGMCEGE-VYUBKLCTSA-N	Flavonoids	Flavonoid glycosides	Phytochemical.Oxyaromatic.Compound	3.013	579.135	0.578045	1.29323	0.00866546
Peak_03732	IACI	0.019906	C26H27IN6O3	VWFWJPJMAFRNET-MQWMPURMSA-N	Aromatic heteropolycyclic compounds	Cinchona alkaloids	Not.Matched	2.675	595.131	0.294355	1.45846	0.000420919
Peak_03735	Isobutrin	0.000125	C27H32O15	XOTWNDIAAITUKR-KUUXHJTOSA-N	Flavonoids	Flavonoid glycosides	Phytochemical.Oxyaromatic.Compound	2.863	595.166	0.3668	1.22867	0.0320146
Peak_03745	LPS(24:6)	0.1647	C30H48NO9P		Glycerophosphoserines	LPS	Lipid	2.691	596.134	0.363565	1.37315	0.000406005
Peak_04258	PS(22:6/4:1)	0.127587	C32H48NO10P		Glycerophosphoserines	PS	Lipid	2.792	636.166	0.894973	1.07296	0.00422762
Peak_20386	GalCer(d17:2/39:0)	0.3674	C62H119NO8		Glycosphingolipids	HexCer	Lipid	2.809	1005.25	0.210532	1.07546	5.75047e-05
positive
Peak #	Name	Annotation error	Formula	inchi key	Main group	Sub group	Compound Match	RT Min	m.z	VIP score	log2fold change	adj p
Peak_00728	3-tert-Butyl-5-methylcatechol	4e-07	C11H16O2	YKYXORJDSTUCTN-UHFFFAOYSA-N	Benzenes	Phenylpropanes	Lipid	7.48574	181.123	0.968	1.2097	0.0122291
Peak_01191	2,5-Dichloro-4-oxohex-2-enedioate	0.0014182	C6H4Cl2O5	PLPVRWUZGSFJJB-OWOJBTEDSA-N	Fatty acids	Halogenated FA	Phytochemical.Oxyaromatic.Compound	9.9651	226.953	1.13342	1.36901	0.0410703
Peak_02096	Salicin	0.00223	C13H18O7	NGFMICBWJRZIBI-UJPOAAIJSA-N	Glycosyl compounds	O-glycosyl compounds	Lipid	1.2761	287.111	0.469293	1.37537	0.000606244
Peak_02148	N-Succinyl-2-amino-6-ketopimelate	0.013722	C11H15NO8	SDVXSCSNVVZWDD-LURJTMIESA-N	Amino acids and peptides	Amino acids	Not.Matched	0.640272	290.074	0.753109	-1.04943	0.00064597
Peak_02303	D-Prephenyl lactate	0.0001248	C13H14O8	LNGMWZFHTXFDNM-RBDZCENOSA-N	Carboxylic acids	Tricarboxylic acids	Phytochemical.Oxyaromatic.Compound	2.62688	299.077	0.58394	1.11621	0.000225174
Peak_02391	Haematoxylin	0.0020328	C16H14O6	WZUVPPKBWHMQCE-XJKSGUPXSA-N	Flavonoids	Neoflavonoids	Phytochemical.Oxyaromatic.Compound	1.28205	303.085	0.578836	1.27969	0.00683818
Peak_04301	C19 Sphingosine 1-phosphate	0.0082628	C19H40NO5P	ZWOGUYCCVIDLTK-OVMWUVNSSA-N	Sphingoid bases	Sphingoid base 1-P	Lipid	6.796	394.264	1.12703	-1.17472	0.0442187
Peak_05440	Apigenin-7-O-glucoside	0.0268297	C21H20O10	KMOUJOKENFFTPU-HXBJIUPGSA-N	Flavonoids	Flavonoid glycosides	Phytochemical.Oxyaromatic.Compound	3.68889	433.141	1.07053	1.38092	0.0231315
Peak_05505	(5Z)-(3S)-1alpha,25-Dihydroxy-3-deoxy-3-thiavitamin D3 3-oxide	0.0032006	C26H42O3S	WOGXXUYWQKFSGA-HBOBPDLOSA-N	Secosterols	Vitamin D3	Lipid	7.48574	435.29	0.735586	1.04831	0.0234857
Peak_07647	Glyburide	0.0188713	C23H28ClN3O5S	ZNNLBTZKUZBEKO-UHFFFAOYSA-N	Benzenes	Benzenesulfonyl compounds	Protein	4.00529	494.133	1.34142	-1.2592	0.0284704
Peak_12276	Taurochenodeoxycholic acid 7-sulfate	0.0809443	C26H45NO9S2	WTKQKSAFONWCMW-BJLOMENOSA-N	Bile acids	C24 bile acids	Lipid	2.64366	580.181	0.856206	-1.03783	0.0214173
Peak_16064	PA(10:0_22:5)	4.59e-05	C35H59O8P		Glycerophosphates	PA	Lipid	6.99765	639.403	0.68253	1.28567	0.00617398
Peak_16126	PC(22:4/4:1)	0.0096508	C34H58NO8P		Glycerophosphocholines	PC	Lipid	6.99765	640.408	0.689878	1.03169	0.0121965
Peak_17088	All-trans-heptaprenyl diphosphate	0.0092382	C35H60O7P2	LSJLEXWXRKTZAJ-YUIIPXGZSA-N	Polyprenols	Bactoprenol diphosphates	Lipid	6.54393	655.399	0.589794	1.18	0.0456506
Peak_29773	DGDG(11:0_20:3)	0.0024487	C46H80O15		Glycosyldiradylglycerols	DGDG	Lipid	6.81278	873.56	0.915387	-1.46611	0.0173164

## Sheet: mb_mc_r
Supplementary Table S1: Significance of the different mass features over various treatments. The data are shown separately for negative and positive mode. The significantly modified metabolites for each treatment are given on the separate sheets. The raw data is given in the Supplementary Table S5
Name: Putative annotation as shown in Supplementary Table S6
RT min: retention time
m.z: mass-to-charge ratio
VIP score: variable influence on projection
adj p: FDR adjusted P value (significance P< 0.005)
NA: not available
negative
NA
positive
Peak #	Name	Annotation error	Formula	inchi key	Main group	Sub group	Compound Match	RT.Min	m.z	VIP score	log2fold change	adj p
Peak_00558	Isopropylmaleate	0.0005112	C7H10O4	NJMGRJLQRLFQQX-HYXAFXHYSA-N	Fatty acids	Dicarboxylic acids	Lipid	3.78483	159.066	0.445175	1.33902	0.0119636
Peak_05022	Asn-Thr-Trp	0.0003256	C19H25N5O6	XCBKBPRFACFFOO-AQZXSJQPSA-N	Amino acids and peptides	Tripeptides	Protein	3.02434	420.188	1.15781	-1.13073	0.0266134
Peak_06050	Exserohilone	0.0133252	C20H22N2O6S2	FWPMSYUTOOUASJ-GFIYPFTLSA-N	Indoles	Indoles	Phytochemical.Oxyaromatic.Compound	3.49738	451.113	1.46008	1.07852	0.0443036

[truncated: 3 more sheets: mb_nb_r, mc_nc_r, nb_nc_r]
