# Supplementary material for: Mycorrhiza-Tree-Herbivore Interactions: Alterations in Poplar Metabolome and Volatilome
Source: Metabolites. 2022 Jan 19;12(2):93. doi: 10.3390/metabo12020093 (PMC8880370; doi:10.3390/metabo12020093)
Supplement: Supplementary file 1 [file metabolites-12-00093-s001.zip › Supplementary Table S2.xlsx]

## Sheet: leaves
Supplementary Table S2: Putatively annotated, discriminant mass features separating the treatments in the loading plots shown in the Figure 3.
Name: Putative annotation as shown in Supplementary Table S6
RT min: retention time
m.z: mass-to-charge ratio
peak #	Name	Formula	m.z	Annotation.error
Peak_00330p	1,2,3-Trihydroxybenzene	C6H6O3	127.04	0.0002621
Peak_00372	3-Bromotyrosine	C9H10BrNO3	258.993	0.011406
Peak_00392p	Fosfomycin	C3H7O4P	139.003	0.0128227
Peak_00394p	4-Hydroxybenzoic acid	C7H6O3	139.04	0.0001695
Peak_00401p	Cis-4-carboxymethylenebut-2-en-4-olide	C6H4O4	141.019	0.0003404
Peak_00412	2-Amino-4-oxo-6-(1',2'-dioxoprolyl)-7,8-dihydroxypteridine	C9H9N5O5	267.051	0.0224
Peak_00433p	2-Methylglutaconic acid	C6H8O4	145.05	7.69e-05
Peak_00472	Cys-Cys-Gly	C8H15N3O4S2	281.068	0.002401
Peak_00474	Pseudobaptigenin	C16H10O5	282.071	0.000175
Peak_00548	5'-Methylthioadenosine	C11H15N5O3S	297.062	0.0516
Peak_00554	Bowdichione	C16H10O6	298.066	0.0003
Peak_00554p	Isopropylmaleate	C7H10O4	159.066	0.0001013
Peak_00583p	1-Methylpropyl 1-propenyl disulfide	C7H14S2	163.061	0.0002805
Peak_00588p	Isosafrole	C10H10O2	163.079	0.0024962
Peak_00597p	4-Acetamidobenzaldehyde	C9H9NO2	164.07	0.0014464
Peak_00688p	1,2,3-Propanetricarboxylic acid	C6H8O6	177.041	0.0005522
Peak_00719p	3,4-Dihydroxy-trans-cinnamate	C9H8O4	181.05	2.33e-05
Peak_00799	Ala-Cys-His	C12H19N5O4S	329.125	0.007777
Peak_00833p	Isosorbide Mononitrate	C6H9NO6	192.057	0.0056562
Peak_00848	Arg-Tyr	C15H23N5O4	337.206	0.012995
Peak_00881	Aristolochic acid	C17H11NO7	341.088	0.0144
Peak_00938p	N-Acetyl-2-aminoadipic acid	C8H13NO5	204.088	0.0004719
Peak_00941	Glucolepidiin	C9H17NO9S2	347.006	0.046473
Peak_00961	Meloxicam	C14H13N3O4S2	351.058	0.0082
Peak_01107p	Hydroxydodecanoic acid	C12H24O3	217.543	0.361987
Peak_01126p	4-Amino-2-methyl-5-phosphomethylpyrimidine	C6H10N3O4P	220.048	0.0005392
Peak_01185	Chrysosplenetin	C19H18O8	374.082	0.03717
Peak_01188p	Prometon	C10H19N5O	226.548	0.380698
Peak_01201p	3,7-Dimethyl-2E,6E-decadien-1,10-dioic acid	C12H18O4	227.129	0.0001028
Peak_01256p	N(omega)-Phosphohypotaurocyamine	C3H10N3O5PS	231.995	0.021241
Peak_01265p	Diuron	C9H10Cl2N2O	232.99	0.0345606
Peak_01289p	alpha-Cyclohexylmandelic acid	C14H18O3	235.131	0.0028687
Peak_01298	Cys-Thr-Tyr	C16H23N3O6S	385.151	0.002241
Peak_01453p	sn-Glycero-3-phosphoglycerol	C6H15O8P	247.045	0.0130376
Peak_01459p	Olivacine	C17H14N2	247.119	0.0050547
Peak_01485p	Gly-Ser-Ser	C8H15N3O6	250.105	0.0009908
Peak_01490	Rotenonone	C23H18O7	406.122	0.007255
Peak_01504	Asp-His-His	C16H21N7O6	407.172	0.007333
Peak_01511	Devazepide	C25H20N4O2	408.175	0.0006
Peak_01517p	4'-O-Methylisoflavone	C16H12O3	253.087	1.28e-05
Peak_01636p	5-Methylthioribose 1-phosphate	C6H13O7PS	261.003	0.0170248
Peak_01665p	Mannitol 1-phosphate	C6H15O9P	263.018	0.0355626
Peak_01669p	Asp-Glu	C9H14N2O7	263.085	0.002636
Peak_01761	Cys-Phe-Tyr	C21H25N3O5S	431.136	0.038494
Peak_01772	Apigenin-7-O-glucoside	C21H20O10	432.139	0.007
Peak_01820p	Leflunomide	C12H9F3N2O2	271.071	0.0009218
Peak_01840	Polythiazide	C11H13ClF3N3O4S3	439.08	0.07712
Peak_01855p	1,2-bis(4-Hydroxy-3-methoxyphenyl)ethylene	C16H16O4	273.107	0.0058741
Peak_01869p	Brugine	C12H19NO2S2	274.084	0.0098976
Peak_01959	Sisomycin	C19H37N5O7	447.276	0.011299
Peak_01961p	Sulfamonomethoxine	C11H12N4O3S	281.074	0.0025214
Peak_01972p	11-Octadecynoic acid	C18H32O2	281.575	0.326701
Peak_01976p	Nitrazepam	C15H11N3O3	282.086	0.0022707
Peak_01985p	Hexachlorobenzene	C6Cl6	282.588	0.232807
Peak_02102	Amygdalin	C20H27NO11	457.129	0.050411
Peak_02124p	Orotidine	C10H12N2O8	289.065	0.0023632
Peak_02125p	Orotidine	C10H12N2O8	289.063	0.0048559
Peak_02127p	Aromadendrin	C15H12O6	289.072	0.00052
Peak_02143	3-Phosphoglycerol-glutathione	C13H24N3O11PS	461.109	0.003916
Peak_02146	Azlocillin	C20H23N5O6S	461.146	0.008904
Peak_02148p	N-Succinyl-2-amino-6-ketopimelate	C11H15NO8	290.074	0.013722
Peak_02161p	D-Sedoheptulose 7-phosphate	C7H15O10P	291.019	0.0288286
Peak_02185p	Prontosil	C12H13N5O2S	292.092	0.0048429
Peak_02220p	Asp-Cys-Gly	C9H15N3O6S	294.085	0.0092589
Peak_02243p	Laurinterol	C15H19BrO	295.064	0.0063015
Peak_02246p	Dehydrocycloguanandin	C18H14O4	295.086	0.0108
Peak_02257p	7Z-Heneicosene	C21H42	295.586	0.249484
Peak_02278p	Calophyllin B	C18H16O4	297.119	0.0058399
Peak_02301p	Bowdichione	C16H10O6	298.995	0.0606537
Peak_02324p	(R)-4'-Phosphopantothenic acid	C9H18NO8P	300.088	0.0034282
Peak_02374p	Ala-Asp-Pro	C12H19N3O6	302.135	0.0001069
Peak_02384	10-Propargyl-5,8-dideazafolic acid	C24H23N5O6	477.142	0.041833
Peak_02390p	Neostigmine bromide	C12H19BrN2O2	303.069	0.0023552
Peak_02415p	Evodiamine	C19H17N3O	304.141	0.004478
Peak_02450p	Epigallocatechin	C15H14O7	307.082	0.0001953
Peak_02480p	Allamandin	C15H16O7	309.096	0.0014824
Peak_02485p	Porphyrin-ring	C20H12N4	309.12	0.0055304
Peak_02528p	gamma-Glutamyltyrosine	C14H18N2O6	311.125	0.0005398
Peak_02533	Arg-Glu-Trp	C22H31N7O6	489.176	0.085583
Peak_02559	Arg-Met-Trp	C22H33N7O4S	491.25	0.003475
Peak_02602p	Jatrophatrione	C20H26O3	315.196	3.59e-05
Peak_02620	PS(11:0/4:1)	C21H38NO10P	495.245	0.005337
Peak_02653	5-O-(Indol-3-ylacetyl)-myo-inositol D-galactoside	C22H29NO12	499.183	0.000975
Peak_02702p	Phenolphthalin	C20H16O4	321.102	0.0108575
Peak_02731p	Chloramphenicol	C11H12Cl2N2O5	322.866	0.154617
Peak_02774p	Bis-D-fructose 2',1:2,1'-dianhydride	C12H20O10	325.113	0.0005591
Peak_02775p	Prazepam	C19H17ClN2O	325.108	0.0026601
Peak_02776p	Prazepam	C19H17ClN2O	325.111	0.0002676
Peak_02793p	Midazolam	C18H13ClFN3	326.096	0.0099826
Peak_02795p	Cys-Gly-Phe	C14H19N3O4S	326.118	0.0001247
Peak_02944	Mahuannin D	C30H24O9	528.161	0.019035
Peak_02953p	6-Methoxytaxifolin	C16H14O8	335.076	0.0008607
Peak_02961	13-Dihydrodaunorubicin	C27H31NO10	529.157	0.071799
Peak_02990p	6-nitro-2,3-dioxo-1,4-dihydrobenzo[f]quinoxaline-7-sulfonamide	C12H8N4O6S	336.951	0.0736625
Peak_03015	CDP-abequose	C15H25N3O14P2	533.094	0.013176
Peak_03064	Phe-Trp-Trp	C31H31N5O4	537.214	0.044605
Peak_03077p	Ala-Ser-Tyr	C15H21N3O6	340.151	0.0004041
Peak_03097p	Psorospermin	C19H16O6	341.103	0.0007306
Peak_03119p	Aristolochic acid	C17H11NO7	342.069	0.0070222
Peak_03136p	Caffeic acid 3-glucoside	C15H18O9	343.102	0.0015174
Peak_03189p	Glu-Pro-Thr	C14H23N3O7	346.151	0.0102197
Peak_03231p	Dehydroascorbic acid dimer	C12H12O12	348.991	0.050279
Peak_03286p	Penicillin V	C16H18N2O5S	351.106	0.0043755
Peak_03316	UDP-4-deoxy-4-formamido-beta-L-arabinose	C15H23N3O16P2	563.141	0.052645
Peak_03470	Cefotetan	C17H17N7O8S4	575.123	0.095857
Peak_03472	Zafirlukast	C31H33N3O6S	575.169	0.081006
Peak_03485	Proanthocyanidin A2	C30H24O12	576.172	0.001224
Peak_03493p	Coumeroic acid	C17H14N2O7	359.083	0.0051817
Peak_03513	Procyanidin B1	C30H26O12	578.139	0.034431
Peak_03514	Kaempferitrin	C27H30O14	578.177	0.009439
Peak_03515p	Capecitabine	C15H22FN3O6	360.152	0.0055447
Peak_03526p	(S)-Rosmarinic acid	C18H16O8	361.056	0.0367768
Peak_03557p	Bezafibrate	C19H20ClNO4	362.114	0.0018415
Peak_03578p	Chelirubine	C21H16NO5	363.093	0.0177126
Peak_03580p	Chelirubine	C21H16NO5	363.112	0.0013168
Peak_03580p	Chelirubine	C21H16NO5	363.112	0.0013168
Peak_03583p	Antirrhinoside	C15H22O10	363.134	0.0047365
Peak_03583p	Antirrhinoside	C15H22O10	363.134	0.0047365
Peak_03597p	Tetracosatrienoic acid	C24H42O2	363.615	0.288492
Peak_03597p	Tetracosatrienoic acid	C24H42O2	363.615	0.288492
Peak_03603p	Rufloxacin	C17H18FN3O3S	364.114	0.0009747
Peak_03603p	Rufloxacin	C17H18FN3O3S	364.114	0.0009747
Peak_03633p	Indapamide	C16H16ClN3O3S	366.083	0.0144376
Peak_03650p	Atovaquone	C22H19ClO3	367.097	0.0133232
Peak_03654p	Atovaquone	C22H19ClO3	367.1	0.0099335
Peak_03667p	Nervonic acid	C24H46O2	367.6	0.242102
Peak_03688	Fluphenazine decanoate	C32H44F3N3O2S	591.231	0.112633
Peak_03691p	3-O-Feruloylquinic acid	C17H20O9	369.119	0.0001384
Peak_03732	Taurocholic acid 3-sulfate	C26H45NO10S2	595.131	0.1505
Peak_03732p	Digalacturonic acid	C12H18O13	371.075	0.0080481
Peak_03733p	Fraxin	C16H18O10	371.106	0.0080674
Peak_03733p	Fraxin	C16H18O10	371.106	0.0080674
Peak_03736p	Fraxin	C16H18O10	371.113	0.015214
Peak_03760p	Cholest-5-ene	C27H46	371.606	0.238366
Peak_03760p	Cholest-5-ene	C27H46	371.606	0.238366
Peak_03809p	N-Acetylmuramic acid 6-phosphate	C11H20NO11P	374.077	0.0087294
Peak_03825p	Arachidonoylmorpholine	C24H39NO2	374.579	0.272528
Peak_03827	LPS(24:3)	C30H54NO9P	603.236	0.1406
Peak_03843	GDP-glucose	C16H25N5O16P2	605.151	0.0458
Peak_03881	UDP-N-acetylgalactosamine	C17H27N3O17P2	607.209	0.1064
Peak_03895p	7Z,11Z-Heptacosadiene	C27H52	377.606	0.191376
Peak_04057p	Behenoyl-EA	C24H49NO2	384.618	0.234082
Peak_04073	Lanceotoxin A	C32H44O12	620.171	0.1453
Peak_04115	PS(10:0_14:0)	C30H58NO10P	623.159	0.241837
Peak_04136	11-trans-LTC4	C30H47N3O9S	625.178	0.1503
Peak_04155	Chlorophyllide b	C35H32MgN4O6	628.175	0.0742
Peak_04162p	Fructoselysine 6-phosphate	C12H25N2O10P	389.124	0.0082053
Peak_04164p	Secologanin	C17H24O10	389.159	0.0137309
Peak_04166	Indaconitine	C34H47NO10	629.173	0.176997
Peak_04209p	5,7,2'-Trihydroxy-3,6,4',5'-tetramethoxyflavone	C19H18O9	391.084	0.019178
Peak_04210p	5,7,2'-Trihydroxy-3,6,4',5'-tetramethoxyflavone	C19H18O9	391.079	0.0240516
Peak_04214p	5,7,2'-Trihydroxy-3,6,4',5'-tetramethoxyflavone	C19H18O9	391.107	0.0034164
Peak_04214p	5,7,2'-Trihydroxy-3,6,4',5'-tetramethoxyflavone	C19H18O9	391.107	0.0034164
Peak_04216p	Piceid	C20H22O8	391.126	0.0137742
Peak_04216p	Piceid	C20H22O8	391.126	0.0137742
Peak_04240p	Hexacosatrienoic acid	C26H46O2	391.62	0.262651
Peak_04244	Aflatoxin B1exo-8,9-epoxide-GSH	C27H29N3O13S	635.163	0.024114
Peak_04244p	Asp-Glu-Glu	C14H21N3O10	392.11	0.0206177
Peak_04245	Aflatoxin B1exo-8,9-epoxide-GSH	C27H29N3O13S	635.163	0.024114
Peak_04265	PS(22:6/4:1)	C32H48NO10P	637.166	0.183587
Peak_04266	PS(22:6/4:1)	C32H48NO10P	637.176	0.148587
Peak_04277	Okanin 4'-(4''-acetyl-6''-p-coumarylglucoside)	C32H30O14	638.179	0.025561
Peak_04299	CMP-pseudaminic acid	C22H34N5O15P	639.195	0.010902
Peak_04340	PS(22:4/4:0)	C32H54NO10P	643.15	0.240537
Peak_04359	Coenzyme F420-1	C24H29N4O15P	644.171	0.008703
Peak_04367	Cefoperazone	C25H27N9O8S2	645.133	0.0494
Peak_04437	Scutianine F	C38H45N5O5	651.16	0.23407
Peak_04451	Esmeraldin B	C38H28N4O7	652.163	0.067799
Peak_04455p	Arg-Gln-Pro	C16H29N7O5	400.236	0.0046565
Peak_04477	Tricetin 7,3'-diglucuronide	C27H26O19	654.143	0.006164
Peak_04507	PI-Cer(d14:0/10:0(OH))	C30H60NO12P	657.097	0.317317
Peak_04513	PI-Cer(d14:0/10:0(OH))	C30H60NO12P	657.168	0.257317
Peak_04553	Elloramycin A	C32H36O15	660.164	0.0624
Peak_04679	Patuletin 3-(6''-(E)-feruloylglucoside)	C32H30O16	670.139	0.0404
Peak_04681p	Asp-His-His	C16H21N7O6	408.166	0.0026635
Peak_04703	LPIP(18:4)	C27H46O15P2	672.134	0.128201
Peak_04725	Veratridine	C36H51NO11	673.234	0.128211
Peak_04744	Fumonisin C4	C33H57NO13	675.156	0.269995
Peak_04766p	Bruceine D	C20H26O9	411.165	0.0005895
Peak_04810p	Podophyllotoxone	C22H20O8	413.123	0.0009562
Peak_04814p	Cys-Gln-Tyr	C17H24N4O6S	413.156	0.0062392
Peak_04842p	Cys-Glu-Tyr	C17H23N3O7S	414.126	0.0080045
Peak_04864p	Diltiazem	C22H26N2O4S	415.161	0.0087335
Peak_04877	(S)-NADHX	C21H31N7O15P2	683.218	0.042664
Peak_04879	(S)-NADHX	C21H31N7O15P2	683.218	0.047664
Peak_04885	PI-Cer(d14:0/13:0)	C33H66NO11P	683.467	0.0144
Peak_04899p	Cys-Met-Tyr	C17H25N3O5S2	416.143	0.0114807
Peak_05095	PI-Cer(d14:2/13:0(OH))	C33H62NO12P	695.224	0.207967
Peak_05111p	Trehalose 6-phosphate	C12H23O14P	423.088	0.0020498
Peak_05161	Leucomycin V	C35H59NO13	701.173	0.255641
Peak_05187	PE(34:8)	C39H62NO8P	703.116	0.3283
Peak_05204p	Asp-Glu-Tyr	C18H23N3O9	426.14	0.0118182
Peak_05229	Fumonisin B2	C34H59NO14	705.243	0.17556
Peak_05233	PI-Cer(d14:2/15:1)	C35H64NO11P	705.452	0.0087
Peak_05238p	Tephrorin A	C24H26O7	427.179	0.0029406
Peak_05254p	Nonacosahexaenoic acid	C29H46O2	427.342	0.0157953
Peak_05319p	(3beta,24R,24'R)-Fucosterol epoxide	C29H48O2	429.375	0.0012233
Peak_05347	Nudicauline	C38H50N2O11	710.178	0.20846
Peak_05434p	Apigenin-7-O-glucoside	C21H20O10	433.115	0.0012043
Peak_05439p	Apigenin-7-O-glucoside	C21H20O10	433.135	0.0214487
Peak_05440p	Apigenin-7-O-glucoside	C21H20O10	433.141	0.0268297
Peak_05466p	Pelargonidin 3-O-beta-D-glucoside	C21H21O10	434.118	0.0034882
Peak_05719p	Folic acid	C19H19N7O6	442.125	0.0225696
Peak_05721p	Folic acid	C19H19N7O6	442.146	0.0020748
Peak_05724p	Glu-Phe-Phe	C23H27N3O6	442.201	0.0032436
Peak_05746	LPIP(22:6)	C31H50O15P2	724.219	0.074501
Peak_05759p	Granaticin	C23H22O9	443.126	0.0082328
Peak_05760p	Granaticin	C23H22O9	443.134	0.0005794
Peak_05796	PS(14:1_18:3)	C38H66NO10P	727.169	0.3344
Peak_05796	PS(14:1_18:3)	C38H66NO10P	727.169	0.3344
Peak_05797p	Met-Met-Tyr	C19H29N3O5S2	444.136	0.0271939
Peak_05800p	Met-Met-Tyr	C19H29N3O5S2	444.153	0.0094117
Peak_05815p	Cer(t14:0/12:0)	C26H53NO4	444.643	0.237668
Peak_05825	LPIP3(10:0)	C19H40O21P4	728.161	0.021733
Peak_05828p	Doxycycline	C22H24N2O8	445.149	0.0125643
Peak_05829p	Doxycycline	C22H24N2O8	445.143	0.0180763
Peak_05856p	Triacontatetraenoic acid	C30H52O2	445.644	0.239025
Peak_05859	PS(P-34:9)/PS(O-34:10)	C40H60NO9P	729.166	0.2676
Peak_06046p	Exserohilone	C20H22N2O6S2	451.05	0.0495651
Peak_06096p	Flucythrinate	C26H23F2NO4	452.135	0.0327685
Peak_06123p	Cer(d14:1/14:1)	C28H53NO3	452.636	0.225155
Peak_06135p	Epicatechin 3-O-beta-D-glucoside	C21H24O11	453.124	0.0154947
Peak_06137p	Epicatechin 3-O-beta-D-glucoside	C21H24O11	453.136	0.0041874
Peak_06198p	SITS	C17H14N2O7S3	455.013	0.0090967
Peak_06202p	Sirodesmin H	C20H26N2O8S	455.133	0.015624
Peak_06236	PS(11:0_22:5)	C39H66NO10P	739.215	0.264437
Peak_06254	Kandelin A-1	C39H32O15	740.217	0.008874
Peak_06409	NADPH	C21H30N7O17P3	745.186	0.0569
Peak_06454p	Isoscoparin	C22H22O11	463.145	0.0206546
Peak_06497	DG(O-20:0_26:2)	C49H94O4	747.131	0.37279
Peak_06499	PI-Cer(d14:0/18:3)	C38H70NO11P	747.14	0.3757
Peak_06504p	4-Hydroxy-3-indolylmethylglucosinolate	C16H20N2O10S2	465.041	0.0230965
Peak_06546p	Delphinidin 3-O-beta-D-glucoside	C21H21O12	466.142	0.0309789
Peak_06567p	Cer(d14:1/15:1)	C29H55NO3	466.643	0.217081
Peak_06580p	S-(p-Azidophenacyl)glutathione	C18H22N6O7S	467.137	0.0016965
Peak_06659p	Cromoglicic acid	C23H16O11	469.136	0.0587848
Peak_06767p	Terfenadine	C32H41NO2	472.218	0.103526
Peak_06770	PS(12:0_22:5)	C40H68NO10P	753.178	0.315087
Peak_06771	PS(12:0_22:5)	C40H68NO10P	753.189	0.310087
Peak_06907p	Met-Tyr-Tyr	C23H29N3O6S	476.13	0.0561
Peak_07101p	11-O-Demethylpradinone II	C24H16O11	481.081	0.0040554
Peak_07101p	11-O-Demethylpradinone II	C24H16O11	481.081	0.0040554
Peak_07147p	Chlorantraniliprole	C18H14BrCl2N5O2	481.827	0.151383
Peak_07185	Fumonisin A1	C36H61NO16	763.118	0.32604
Peak_07240	LPIP(24:0)	C33H66O15P2	764.282	0.114701
Peak_07267p	7-Acetoxy-7,8-dihydrobromovulone II	C23H33BrO6	485.105	0.0491209
Peak_07269p	7-Acetoxy-7,8-dihydrobromovulone II	C23H33BrO6	485.131	0.02295
Peak_07472	PI-Cer(d14:1/20:5)	C40H68NO11P	769.221	0.27
Peak_07578	Leucomycin a5	C39H65NO14	771.179	0.2775
Peak_07730p	N(6)-(Dimethylallyl)adenosine 5'-diphosphate	C15H23N5O10P2	496.132	0.0317726
Peak_07767p	Cer(m32:0)	C32H65NO2	496.634	0.124097
Peak_07886p	Bis-gamma-glutamylcystine	C16H26N4O10S2	498.904	0.212759
Peak_08062	PI-Cer(d15:2/20:5)	C41H68NO11P	781.197	0.305
Peak_08068p	Isoglobotriaose	C19H34O15	503.132	0.0656518
Peak_08106	LPIP3(14:1)	C23H46O21P4	782.2	0.004783
Peak_08162	PI-Cer(d15:1/20:5)	C41H70NO11P	783.211	0.2857
Peak_08251p	Streptonigrin	C25H22N4O8	507.167	0.0151386
Peak_08252p	Streptonigrin	C25H22N4O8	507.166	0.0143101
Peak_08297p	Tyr-Tyr-Tyr	C27H29N3O7	508.17	0.0389347
Peak_08376p	PS(12:0/4:1)	C22H40NO10P	510.16	0.0866115
Peak_08377	FADH2	C27H35N9O15P2	787.247	0.0452
Peak_08503	PS(P-16:1/22:6)/PS(O-16:2/22:6)	C44H72NO9P	789.354	0.176472
Peak_08717p	Harrisonin	C27H32O10	517.169	0.0390449
Peak_08761p	Piperacillin	C23H27N5O7S	518.014	0.156917
Peak_08852	PI-Cer(d14:1/22:6)	C42H70NO11P	795.233	0.2757
Peak_08910	LPIP3(O-16:1)	C25H52O20P4	796.236	0.002252
Peak_09007p	Melampodinin	C25H30O12	523.187	0.0055943
Peak_09058p	Arg-Trp-Tyr	C26H33N7O5	524.198	0.0640324
Peak_09075p	Cer(d14:1/18:1(OH))	C32H61NO4	524.453	0.0151777
Peak_09101p	Mascaroside	C26H36O11	525.197	0.0371561
Peak_09120p	LPG(P-20:0)/LPG(O-20:1)	C26H53O8P	525.382	0.0260286
Peak_09138p	Hydroxytetratriacontanoic acid	C34H68O3	525.69	0.165164
Peak_09148	LPIP2(O-22:1)	C31H63O17P3	800.228	0.134819
Peak_09167p	PS(13:0/4:0)	C23H44NO10P	526.192	0.0866105
Peak_09206p	Inumakilactone A glycoside	C24H30O13	527.171	0.0060103
Peak_09507p	Flavonol 3-O-D-xylosylglucoside	C26H28O12	533.157	0.0095683
Peak_09514p	Flavonol 3-O-D-xylosylglucoside	C26H28O12	533.181	0.0151227
Peak_09620p	Luteolin 7-O-(6''-malonylglucoside)	C24H22O14	535.111	0.0017652
Peak_09623p	Cercosporin	C29H26O10	535.138	0.0230513
Peak_09675p	Cyanidin 3-O-(6-O-malonyl-beta-D-glucoside)	C24H23O14	536.113	0.0037234
Peak_09820	Telithromycin	C43H65N5O10	811.228	0.290143
Peak_09883	LPIP3(16:0)	C25H52O21P4	812.231	0.002167
Peak_10036p	dTpdT	C22H31N4O10P	543.134	0.0522087
Peak_10038p	dTpdT	C22H31N4O10P	543.136	0.0498546
Peak_10077p	CMP-KDO	C17H26N3O15P	543.883	0.234976
Peak_10101p	CerP(d14:2/15:1)	C29H54NO6P	544.372	0.0047815
Peak_10133p	Premithramycin A1	C27H28O12	545.156	0.009745
Peak_10138p	CpC	C20H29N6O10P	545.193	0.0165804
Peak_10225	PS(17:2_22:6)	C45H72NO10P	817.186	0.346387
Peak_10329p	Darunavir	C27H37N3O7S	548.205	0.03794
Peak_10340	DG(O-16:1_35:0)	C54H106O4	819.15	0.29889
Peak_10737	PI-Cer(d14:2/24:4)	C44H76NO11P	825.549	0.0076
Peak_10748p	Ceftriaxone	C18H18N8O7S3	555.073	0.0190273
Peak_10849	PS(40:10)	C46H70NO10P	827.329	0.1907
Peak_10903	Maltopentaose	C30H52O26	828.332	0.023318
Peak_10936p	PC(18:4/2:0)	C28H48NO8P	558.287	0.0331368
Peak_10950	DG(O-52:3)	C55H104O4	829.1	0.2695
Peak_10996p	LPI(15:0)	C24H47O12P	559.29	0.0019259
Peak_11043p	dTDP-alpha-D-desosamine	C18H31N3O13P2	560.112	0.0293724
Peak_11107p	Chloramphenicol palmitate	C27H42Cl2N2O6	561.254	0.0039843
Peak_11224p	Gambiriin C	C30H26O11	563.178	0.0220752
Peak_11226p	LPGP(16:1)	C22H44O12P2	563.198	0.040597
Peak_11586p	PG(O-18:0/4:0)	C28H57O9P	569.382	0.0002716
Peak_11595	3-Hydroxypropanoyl-CoA	C24H40N7O18P3S	839.276	0.1017
Peak_11697p	PI(11:0/4:1)	C24H43O13P	571.136	0.116274
Peak_12018p	Zafirlukast	C31H33N3O6S	576.168	0.0487936
Peak_12021	Rifabutin	C46H62N4O11	846.231	0.2435
Peak_12081p	Proanthocyanidin A2	C30H24O12	577.136	0.0011871
Peak_12276p	Taurochenodeoxycholic acid 7-sulfate	C26H45NO9S2	580.181	0.0809443
Peak_12412	3-Hydroxybutanoyl-CoA	C25H42N7O18P3S	853.291	0.111
Peak_12479p	Deinoxanthin	C40H54O3	583.416	0.0010884
Peak_12545p	CerP(d14:0/18:4)	C32H58NO6P	584.42	0.011442
Peak_12708p	LPGP(18:3)	C24H44O12P2	587.234	0.0049345
Peak_12757p	GDP-4-Dehydro-6-deoxy-D-mannose	C16H23N5O15P2	588.099	0.0247028
Peak_12762p	GDP-4-Dehydro-6-deoxy-D-mannose	C16H23N5O15P2	588.17	0.095581
Peak_12821p	Kolaflavanone	C31H24O12	589.161	0.0265396
Peak_13014	Sirohydrochlorin	C42H46N4O16	862.281	0.037881
Peak_13227p	Kaempferol-3-O-rutinoside	C27H30O15	595.12	0.0457647
Peak_13251	LPIP3(20:1)	C29H58O21P4	866.203	0.094117
Peak_13346p	IACI	C26H27IN6O3	597.063	0.0640545
Peak_13494p	PI(13:0/4:1)	C26H47O13P	599.132	0.151906
Peak_13564p	Delphinine	C33H45NO9	600.171	0.146629
Peak_13940p	GDP-glucose	C16H25N5O16P2	606.192	0.107201
Peak_14412p	Oxidized glutathione	C20H32N6O12S2	613.156	0.0036853
Peak_14416p	Oxidized glutathione	C20H32N6O12S2	613.183	0.0229896
Peak_14457p	DG(36:6)	C39H64O5	613.686	0.202571
Peak_14486p	6'''-Oxoneomycin C	C23H43N5O14	614.184	0.104792
Peak_14601p	DG(14:1_22:4)	C39H66O5	615.7	0.201095
Peak_14625p	Paromomycin	C23H45N5O14	616.202	0.101936
Peak_15028	2-Oxoglutaryl-CoA	C26H40N7O20P3S	895.157	0.0032
Peak_15029	2-Oxoglutaryl-CoA	C26H40N7O20P3S	895.174	0.0032
Peak_15447p	Chlorophyllide b	C35H32MgN4O6	629.189	0.0359185
Peak_15829	Precorrin-4	C44H52N4O17	908.294	0.074746
Peak_15922p	LPIP(15:1)	C24H46O15P2	637.201	0.0381729
Peak_16064p	PA(10:0_22:5)	C35H59O8P	639.403	4.59e-05
Peak_16068p	PG(10:0_16:0)	C32H63O10P	639.422	0.0016452
Peak_16126p	PC(22:4/4:1)	C34H58NO8P	640.408	0.0096508
Peak_16311p	Haemocorin	C32H34O14	643.137	0.0662138
Peak_16560p	Gniditrin	C37H42O10	647.161	0.125276
Peak_16598	Decanoyl-CoA	C31H54N7O17P3S	921.282	0.018
Peak_16697p	LPIP2(10:0)	C19H39O18P3	649.201	0.0579295
Peak_16706	3-Oxopimeloyl-CoA	C28H44N7O20P3S	923.191	0.0095
Peak_16821p	Malonylapiin	C29H30O17	651.205	0.0486285
Peak_16938p	Esmeraldin B	C38H28N4O7	653.171	0.0325437
Peak_17222p	Hellicoside	C29H36O17	657.22	0.0163736
Peak_17435	3-Hydroxydecanoyl-CoA	C31H54N7O18P3S	937.338	0.0621
Peak_17599p	LPIP2(11:0)	C20H41O18P3	663.138	0.0205127
Peak_17606p	LPIP(17:2)	C26H48O15P2	663.213	0.0416686
Peak_17690p	Dihydrostreptomycin 6-phosphate	C21H42N7O15P	664.215	0.0404544
Peak_17973p	Cer(d18:0/24:0(OH))	C42H85NO4	668.673	0.0170037
Peak_18193	MeDAG(60:4)	C63H116O5	953.258	0.3357
Peak_18419p	DG(O-41:3)	C44H82O4	675.662	0.0327185
Peak_18674	Cobalt-precorrin 5	C45H53CoN4O16	964.226	0.085852
Peak_18886p	Bruceoside A	C32H42O16	683.151	0.104595
Peak_19004p	PI(10:0_13:0)	C32H61O13P	685.24	0.152564
Peak_19557p	PG(10:0_20:1)	C36H69O10P	693.473	0.0018558
Peak_19577	Farnesoyl-CoA	C36H58N7O17P3S	985.298	0.0443
Peak_19594p	PI-Cer(d14:1/14:1)	C34H64NO11P	694.143	0.28707
Peak_19761p	Cer(d18:0/26:0(OH))	C44H89NO4	696.76	0.073008
Peak_20103p	Leucomycin V	C35H59NO13	702.268	0.13913
Peak_20178p	LPIP2(14:1)	C23H45O18P3	703.187	0.0027721
Peak_20227	Hexadecatrienoyl-CoA	C37H62N7O17P3S	1001.35	0.0006
Peak_20250p	PE(34:8)	C39H62NO8P	704.216	0.213112
Peak_20276p	Cer(d14:2/32:0)	C46H89NO3	704.716	0.0241858
Peak_20277p	Cer(d14:2/32:0)	C46H89NO3	704.718	0.0258812
Peak_20280p	Cer(d14:2/32:0)	C46H89NO3	704.741	0.0489348
Peak_20308p	LPIP2(14:0)	C23H47O18P3	705.202	0.0033676
Peak_20310p	LPIP2(14:0)	C23H47O18P3	705.218	0.0124075
Peak_20338p	DG(O-43:2)	C46H88O4	705.718	0.0421398
Peak_20360p	Fumonisin B2	C34H59NO14	706.205	0.197011
Peak_20426p	LPIP(20:1)	C29H56O15P2	707.257	0.0604572
Peak_21505	2E-Octadecenoyl-CoA	C39H68N7O17P3S	1031.27	0.1175
Peak_22088	Nonadecenoyl-CoA	C40H68N7O17P3S	1043.41	0.0025
Peak_22165	Nonadecanoyl-CoA	C40H70N7O17P3S	1045.42	0.0118
Peak_22493p	Robinin	C33H40O19	741.226	0.0013835
Peak_22494p	Robinin	C33H40O19	741.227	0.0025775
Peak_22501p	Robinin	C33H40O19	741.258	0.0331208
Peak_22559p	PI-Cer(d14:2/18:4)	C38H64NO11P	742.23	0.199633
Peak_22742p	LPIP2(17:1)	C26H51O18P3	745.189	0.0482274
Peak_22744p	LPIP2(17:1)	C26H51O18P3	745.214	0.0226365
Peak_22776p	DG(O-46:3)	C49H92O4	745.717	0.0089916
Peak_23225	DG(29:0_39:0)	C71H140O5	1073.24	0.152925
Peak_23447p	LPIP2(18:2)	C27H51O18P3	757.198	0.0384676
Peak_23813p	LPIP(24:1)	C33H64O15P2	763.137	0.242699
Peak_24287p	LPIP3(O-14:0)	C23H50O20P4	771.238	0.0453408
Peak_24896p	LPIP2(20:4)	C29H51O18P3	781.275	0.0382214
Peak_24959p	PI-Cer(d15:2/20:5)	C41H68NO11P	782.276	0.184639
Peak_25029p	LPIP2(20:3)	C29H53O18P3	783.256	0.0035733
Peak_25031p	LPIP2(20:3)	C29H53O18P3	783.276	0.0234516
Peak_25031p	LPIP2(20:3)	C29H53O18P3	783.276	0.0234516
Peak_25122p	GalCer(d40:1)	C46H89NO8	784.744	0.0775159
Peak_25204p	FAD	C27H33N9O15P2	786.232	0.0666599
Peak_25895p	PI-Cer(d14:0/22:6)	C42H72NO11P	798.301	0.191519
Peak_25941p	LPIP3(15:0)	C24H50O21P4	799.13	0.0578767
Peak_26182p	LPIP2(21:0)	C30H61O18P3	803.257	0.058301
Peak_26257p	PI-Cer(d14:1/22:2)	C42H78NO11P	804.535	0.0041639
Peak_26303p	LPIP2(22:6)	C31H51O18P3	805.293	0.0559376
Peak_26465p	Docetaxel	C43H53NO14	808.164	0.190192
Peak_26635p	LPIP3(16:1)	C25H50O21P4	811.246	0.0585328
Peak_26821p	Troleandomycin	C41H67NO15	814.297	0.161743
Peak_26877p	LPIP2(22:1)	C31H61O18P3	815.316	0.0012928
Peak_26878p	LPIP2(22:1)	C31H61O18P3	815.354	0.0393624
Peak_26932p	PS(P-40:8)/PS(O-40:9)	C46H74NO9P	816.319	0.198706
Peak_26933p	PS(P-40:8)/PS(O-40:9)	C46H74NO9P	816.317	0.200665
Peak_26974p	LPIP2(22:0)	C31H63O18P3	817.235	0.0956814
Peak_26978p	LPIP2(22:0)	C31H63O18P3	817.318	0.0123556
Peak_27719p	Cephalomannine	C45H53NO14	832.34	0.0141401
Peak_27719p	Cephalomannine	C45H53NO14	832.34	0.0141401
Peak_27983p	LPIP2(24:4)	C33H59O18P3	837.296	0.0032239
Peak_27983p	LPIP2(24:4)	C33H59O18P3	837.296	0.0032239
Peak_28026p	Butyryl-CoA	C25H42N7O17P3S	838.299	0.134272
Peak_28026p	Butyryl-CoA	C25H42N7O17P3S	838.299	0.134272
Peak_28182p	LPIP3(18:0)	C27H56O21P4	841.235	0.0003404
Peak_28617p	PI-Cer(d18:2/22:6)	C46H76NO11P	850.362	0.161411
Peak_28657p	Precorrin-1	C41H46N4O16	851.327	0.0285424
Peak_29069p	LPIP2(25:0)	C34H69O18P3	859.322	0.0559477
Peak_29396p	Cassinine	C44H51NO17	866.311	0.0127138
Peak_29442p	LPIP3(20:1)	C29H58O21P4	867.22	0.0303324
Peak_29451p	LPIP3(20:1)	C29H58O21P4	867.31	0.0602519
Peak_29490p	2-Methyl-3-hydroxybutyryl-CoA	C26H44N7O18P3S	868.22	0.0443003
Peak_29496p	Anthemis glycoside A	C39H49NO21	868.254	0.0336631
Peak_29502p	Anthemis glycoside A	C39H49NO21	868.324	0.0362681
Peak_29555p	LPIP2(26:2)	C35H67O18P3	869.324	0.0380958
Peak_29607p	PS(P-44:9)/PS(O-44:10)	C50H80NO9P	870.324	0.24073
Peak_29656p	LPIP2(26:1)	C35H69O18P3	871.265	0.112768
Peak_29708p	PI-Cer(d15:2/26:2)	C47H86NO11P	872.268	0.333653
Peak_29723p	PI-Cer(d15:2/26:2)	C47H86NO11P	872.54	0.0621349
Peak_29773p	DGDG(11:0_20:3)	C46H80O15	873.56	0.0024487
Peak_29864p	PI(37:3)	C46H83O13P	875.275	0.290115
Peak_29890p	PE-Cer(d22:0/26:0(OH))	C50H103N2O7P	875.776	0.0174184
Peak_29907p	Hex2Cer(d14:2/22:6)	C48H77NO13	876.276	0.271387
Peak_30470p	Demethylmacrocin	C44H73NO17	888.334	0.161604
Peak_30833p	LPIP3(22:0)	C31H64O21P4	897.191	0.106315
Peak_30865p	PI(P-20:0/20:5)/PI(O-20:1/20:5)	C49H85O12P	897.618	0.0320819
Peak_30932p	PI(15:1_24:4)	C48H83O13P	899.331	0.234034
Peak_30951p	PA(P-14:0/37:0)/PA(O-14:1/37:0)	C54H107O7P	899.775	0.0080821
Peak_31611p	LPIP2(29:0)	C38H77O18P3	915.226	0.214057
Peak_31679p	Siroheme	C42H44FeN4O16	917.241	0.0230131
Peak_31682p	LPIP3(24:4)	C33H60O21P4	917.272	0.0058213
Peak_32300p	Cer(t22:0/39:0)	C61H123NO4	935.247	0.294118
Peak_32410p	3-Hydroxydecanoyl-CoA	C31H54N7O18P3S	938.367	0.113587
Peak_32519p	PI(18:1_24:4)	C51H89O13P	941.287	0.325103
Peak_32520p	PI(18:1_24:4)	C51H89O13P	941.287	0.324949
Peak_32557p	DG(O-60:3)	C63H120O4	942.29	0.36349
Peak_32557p	DG(O-60:3)	C63H120O4	942.29	0.36349
Peak_32579p	LPIP2(31:0)	C40H81O18P3	943.326	0.145361
Peak_32605p	Dodecatrienoyl-CoA	C33H52N7O17P3S	944.328	0.0845819
Peak_32924p	Hex2Cer(d15:2/26:2)	C53H95NO13	954.316	0.371813
Peak_32925p	Hex2Cer(d15:2/26:2)	C53H95NO13	954.313	0.375541
Peak_33046p	PI(44:10)	C53H83O13P	959.297	0.267923
Peak_33046p	PI(44:10)	C53H83O13P	959.297	0.267922
Peak_33073p	DG(O-22:1_39:0)	C64H126O4	960.3	0.326425
Peak_33073p	DG(O-22:1_39:0)	C64H126O4	960.3	0.326425
Peak_33355p	PS(50:9)	C56H92NO10P	970.337	0.316626
Peak_33387p	Mycothione	C34H58N4O24S2	971.336	0.0401142
Peak_33501p	DGDG(17:2_22:6)	C54H86O15	975.295	0.309286
Peak_33501p	DGDG(17:2_22:6)	C54H86O15	975.295	0.309286
Peak_33502p	DGDG(17:2_22:6)	C54H86O15	975.291	0.314148
Peak_33539p	11E-Tetradecenoyl-CoA	C35H60N7O17P3S	976.299	0.007377
Peak_33564p	DGDG(17:1_22:6)	C54H88O15	977.3	0.32075
Peak_34136p	2E-Hexadecenoyl-CoA	C37H64N7O17P3S	1004.31	0.029655

## Sheet: root
Supplementary Table S2: Putatively annotated, discriminant mass features separating the treatments in the loading plots shown in the Figure 3.
Name: Putative annotation as shown in Supplementary Table S6
RT min: retention time
m.z: mass-to-charge ratio
peak	Name	Formula	m.z	Annotation.error
Peak_00450	Chlorpropamide	C10H13ClN2O3S	275.026	0.0005
Peak_00552	Ostruthin	C7H10O4	159.066	0.0001013
Peak_00558	Isopropylmaleate	C7H10O4	159.066	0.0005112
Peak_00753	4-Dodecylbenzenesulfonic acid	C5H14NO4P	184.074	9.45e-05
Peak_00761	Ile-Pro-Val	C8H12N2O3	185.097	0.0039369
Peak_00762	5,5-Diethylbarbituric acid	C8H12N2O3	185.097	0.0039369
Peak_00766	Diethyldithiophosphate	C4H10O2PS2	185.963	0.0310809
Peak_01770	Metoprolol	C15H25NO3	268.18	0.0117898
Peak_02049	Kinamycin D	C18H36O2	285.28	0.0003022
Peak_03293	Gambiriin C	C12H22N4O6S	351.142	0.0078976
Peak_04068	S-Adenosylhomocysteine	C32H61O9P	619.399	0.001677
Peak_05022	Asn-Thr-Trp	C19H25N5O6	420.188	0.0003256
Peak_05824	Doxycycline	C22H24N2O8	445.092	0.0690118
Peak_06050	Exserohilone	C41H70NO8P	734.477	0.001093
Peak_09678	Grepafloxacin glucuronide	C25H30FN3O9	536.174	0.0310153
Peak_10802	PS(17:2_22:1)	C45H82NO10P	826.561	0.001363
Peak_12551	PI(14:0_22:5)	C38H65NO3	584.474	0.0301975
Peak_16243	Cyclothialidine	C26H35N5O12S	642.217	0.0090288
Peak_19478	Fumonisin C2	C33H57NO14	692.245	0.140653
Peak_19891	Calcein AM	C46H46N2O23	993.304	0.062857
Peak_22607	PS(O-18:0/38:0)	C20H42O21P4	743.147	0.0219522
