# Supplementary material for: Mycorrhiza-Tree-Herbivore Interactions: Alterations in Poplar Metabolome and Volatilome
Source: Metabolites. 2022 Jan 19;12(2):93. doi: 10.3390/metabo12020093 (PMC8880370; doi:10.3390/metabo12020093)
Supplement: Supplementary file 1 [file metabolites-12-00093-s001.zip › Supplementary Table S3.xlsx]

## Sheet: VOC emission
Supplemental Table S3: The mean volatile organic compound (VOC) emission +/- SE in pmol m-2 s-1 emitted by poplars leaves in response to mycorrhizal inoculation and/or leaf beetle feeding. VOC emission is shown for control (NC), mycorrihizal (MC), herbivore-infested (NB) or mycorrhizal and herbivore-infested (MB) poplar trees for 0, 1, 2, 4, 8, and 13 days upon the start of the herbivore infestat…
	Day 0									Day 1									Day 2									Day 4									Day 8									Day 13
Compound name	NC		MC		NB		MB			NC		MC		NB		MB			NC		MC		NB		MB			NC		MC		NB		MB			NC		MC		NB		MB			NC		MC
	Mean	SE	Mean	SE	Mean	SE	Mean	SE		Mean	SE	Mean	SE	Mean	SE	Mean	SE		Mean	SE	Mean	SE	Mean	SE	Mean	SE		Mean	SE	Mean	SE	Mean	SE	Mean	SE		Mean	SE	Mean	SE	Mean	SE	Mean	SE		Mean	SE	Mean	SE
Monoterpenes
alpha-pinene	4.09396	1.24182	2.43756	0.391432	1.9419	0.889474	1.83305	1.23277		1.96068	0.788587	0.470007	0.834614	1.49036	0.745784	1.54582	1.07478		1.76788	0.0532566	1.42831	0.161409	1.66298	0.211261	1.37846	0.342751		2.91435	1.21193	1.59078	1.19129	1.38638	0.34957	2.74634	1.73793		4.06377	1.71663	3.42998	0.294565	4.25534	1.5776	5.38727	0.91003		1.38286	0.689235	0.906995	0.416669
gamma-terpinene	2.10566	0.301079	1.70331	0.0847711	0.812371	0.162821	0	0		1.83985	0.364899	0	0	1.34362	0.185318	2.38955	0.700812		1.07558	0.176164	0	0	1.08985	0.198564	1.38199	0.764445		1.10688	0.48402	0.970383	0.486304	1.09108	0.166881	1.27819	0.437585		1.35483	0.0777103	0	0	1.02238	0.129671	1.09371	0.197442		0	0	0	0
camphene	2.58608	0.56811	1.90571	0.283555	1.45547	0.349563	1.42906	0.621176		1.72907	0.337713	1.1044	0.699844	1.03172	0.467774	1.29583	0.374581		0.761242	0.0534408	1.16105	0.664007	0.681694	0.2078	0.546357	0.0915212		1.44545	0.534463	0.965575	0.463354	0.910846	0.194345	1.42864	0.844433		2.65827	0.270306	2.20954	0.100031	3.23365	0.916225	4.50553	1.22019		1.07008	0.249478	1.01232	0.134303
(Z)-sabinenehydrate	10.3235	4.84759	5.40728	1.43027	0	0	0	0		7.19307	2.42214	0	0	0	0	16.5272	6.98509		0	0	0	0	0	0	0	0		0	0	0	0	0	0	0	0		0	0	0	0	0	0	0	0		0	0	0	0
limonene	3.69122	0.766218	2.83544	0.246319	2.03275	0.442989	2.25883	0.679379		2.57364	0.534634	2.08899	1.36269	3.0536	0.738753	3.05312	1.15934		2.29993	0.130605	1.37049	0.212748	2.23389	0.50599	2.17324	1.68812		3.38198	1.54214	1.67177	1.0537	2.79634	0.820377	3.41507	1.70037		4.52831	0.29037	3.08264	0.283082	5.94301	0.836266	6.32546	1.39855		1.42939	0.461012	1.67869	0.575901
linalool	0	0	0	0	0	0	0	0		0	0	0	0	0	0	0	0		0	0	0	0	0	0	0	0		0	0	0	0	13.9561	2.71817	0	0		0	0	0	0	0	0	0	0		0	0	0	0
neo-allo-ocimene	1.0959	0.267553	0	0	0	0	0	0		0	0	0	0	0	0	0	0		0	0	0	0	3.46009	0.244811	0	0		0	0	0	0	16.3635	6.38121	10.9031	5.54225		0	0	0	0	11.9338	3.44606	15.5296	5.43303		0	0	0	0
(E)-beta-ocimene	2.77396	0.262017	0	0	0	0	0	0		0	0	0	0	0	0	0	0		0	0	0	0	30.4123	2.68631	10.7828	1.99675		9.9959	6.40482	0	0	206.113	89.4137	100.407	49.4607		4.14513	0.403077	0	0	145.492	45.707	182.097	73.4843		0	0	0	0
Sesquiterpenes
alpha-amorphene	0	0	0	0	0	0	0	0		0	0	0	0	0	0	0	0		0	0	0	0	0	0	0	0		0	0	0	0	11.1199	2.8769	0	0		0	0	0	0	0	0	0	0		0	0	0	0
alpha-copaene	0	0	0	0	0	0	0	0		0	0	0	0	0	0	0	0		0	0	0	0	3.66005	0.365276	0	0		0	0	0	0	6.49531	1.89353	6.14695	2.63047		0	0	0	0	8.48513	4.31293	7.5991	2.70716		0	0	0	0
alpha-cubebene	0	0	0	0	0	0	0	0		0	0	0	0	0	0	0	0		0	0	0	0	2.86696	0.295983	0	0		0	0	0	0	4.96131	1.47492	6.13375	2.54205		0	0	0	0	7.15853	2.515	0	0		0	0	0	0
alpha-humulene	1.09275	0.090522	0.437338	0.107789	0.640439	0.0497995	0	0		1.37899	0.393932	0	0	1.23709	0.304734	1.09146	0.197424		1.60271	0.061976	0.946626	0.199372	2.51006	0.279695	1.50965	0.41674		3.56852	1.65053	1.31524	0.323027	8.79025	3.24464	5.01714	1.40888		3.32067	0.17816	2.48692	0.444543	7.2334	1.32812	7.06572	2.13386		0.924972	0.0552338	0.852538	0.145393
beta-bourbonene	0	0	0	0	0	0	0	0		0	0	0	0	0	0	0	0		0	0	0	0	0	0	0	0		0	0	0	0	4.03415	1.62228	5.96889	3.95654		0	0	0	0	0	0	0	0		0	0	0	0
beta-caryophyllene	22.6107	2.05118	10.8487	3.02171	11.4889	1.7899	9.38298	2.89334		26.336	7.27318	10.6504	3.14051	23.7385	5.98923	16.624	5.64038		30.2095	1.39907	19.4935	3.03333	40.189	9.74054	30.8679	5.88293		67.9457	31.5103	25.6309	6.44711	160.444	60.4338	92.8601	26.6274		62.9817	4.36435	47.3995	7.3878	160.81	31.7355	132.409	40.6733		19.3666	1.28795	16.9302	3.00983
beta-selinene	0	0	0	0	0	0	0	0		0	0	0	0	0	0	0	0		0	0	0	0	0	0	0	0		8.13921	3.18218	0	0	9.97489	1.73534	7.21686	1.70402		5.80906	0.376873	0	0	0	0	0	0		0	0	0	0
delta-cadinene	0	0	0	0	0	0	0	0		0	0	0	0	0	0	0	0		0	0	0	0	0	0	0	0		0	0	0	0	6.50842	2.59001	0	0		0	0	0	0	0	0	0	0		0	0	0	0
(E,E)-alpha-farnesene	15.2971	3.88048	0	0	7.69224	1.07537	0	0		22.488	6.76199	0	0	21.4712	4.57069	0	0		18.7287	2.32953	6.21179	2.18917	43.0426	12.5529	20.9995	5.16949		33.5676	12.3065	15.2923	3.16664	81.0213	16.3904	48.2396	16.5746		26.5119	6.16004	12.5843	2.4616	72.8129	23.2964	39.6957	7.81415		0	0	0	0
germacrene D	0	0	0	0	0	0	0	0		0	0	0	0	0	0	0	0		0	0	0	0	14.9377	3.38215	4.94939	1.20837		0	0	0	0	32.0889	12.6517	22.0544	11.1081		0	0	0	0	31.9617	15.41	0	0		0	0	0	0
Terpenoids
epsilon-muurolene	0	0	0	0	0	0	0	0		0	0	0	0	0	0	0	0		0	0	0	0	0	0	0	0		0	0	0	0	34.3073	8.74681	0	0		0	0	0	0	0	0	0	0		0	0	0	0
1,1,4,8-tetramethyl-4,7,10-cycloundecatriene	0	0	0	0	0.758502	0.0608602	0	0		1.63571	0.474915	0	0	1.44912	0.348617	1.31308	0.228907		1.8032	0.0394239	1.40046	0.103328	2.77526	0.464762	1.79678	0.49351		2.29525	0.283607	1.51183	0.52313	10.4391	3.86031	5.9625	1.67719		3.73979	0.134963	2.98294	0.522189	8.59436	1.57736	8.4103	2.52766		1.09644	0.062266	1.03655	0.176425
(E)-4,8-dimethyl-1,3,7-nonatriene	4.53577	1.30318	0	0	0	0	0	0		4.35088	1.55835	0	0	0	0	0	0		0	0	0	0	4.81156	0.454576	0	0		0	0	0	0	5.61035	1.04043	4.93931	1.65191		0	0	0	0	0	0	0	0		0	0	0	0
geranylacetone	2.61271	1.6011	2.47897	0.786128	0.490092	0.857207	0.704814	0.784244		8.64021	3.67379	6.78453	3.17403	10.7953	6.84628	8.8232	3.73168		3.62605	0.620323	4.94352	1.06741	5.0679	2.66099	8.58854	5.29029		4.39365	2.42316	6.2571	3.82883	2.74392	0.802599	4.32141	1.91661		6.50085	5.48529	6.51109	2.24042	26.972	23.8661	3.79032	1.03141		6.95859	2.36603	24.729	21.1244
Others
2-phenoxy-ethanol	0	0	0	0	2.74636	0.0510121	0	0		0	0	4.15227	1.25776	4.3806	1.08973	6.46924	3.15778		0	0	0	0	5.09943	1.00565	10.4214	4.34376		0	0	0	0	0	0	0	0		0	0	0	0	11.1609	6.45217	7.59022	0.200492		0	0	0	0
benzeneethanol	0	0	0	0	0	0	0	0		0	0	0	0	0	0	0	0		0	0	0	0	0	0	0	0		0	0	0	0	5.10903	1.4062	5.05156	1.4959		0	0	0	0	0	0	0	0		0	0	0	0
(Z)-3-hexenol	8.715	2.641	3.27189	0.346771	8.20005	3.39513	0	0		0	0	0	0	0	0	0	0		0	0	0	0	0	0	0	0		0	0	0	0	0	0	0	0		0	0	0	0	0	0	0	0		0	0	0	0
(E)-2-heptenal	0	0	0	0	0	0	0	0		0	0	0	0	0	0	0	0		0	0	0	0	0	0	0	0		0	0	0	0	3.17033	0.972481	0	0		0	0	0	0	15.0037	2.93947	0	0		0	0	0	0
salicylicaldehyde	0	0	0	0	0	0	0	0		0	0	0	0	0	0	0	0		0	0	0	0	4.38148	1.1618	0	0		0	0	0	0	8.90558	2.47887	8.24953	3.62107		0	0	0	0	24.0411	5.88542	24.5897	15.3953		0	0	0	0
(E)-2-hexenal	0	0	0	0	0	0	0	0		0	0	0	0	0	0	0	0		0	0	0	0	0	0	0	0		0	0	0	0	20.831	3.18948	0	0		0	0	0	0	28.2586	7.4241	0	0		0	0	0	0
corylone	0	0	0	0	0	0	0	0		0	0	6.22353	0.714359	3.78251	0.391645	0	0		0	0	0	0	0	0	0	0		0	0	0	0	0	0	0	0		0	0	0	0	0	0	0	0		0	0	0	0
(Z)-3-hexen-1-ol acetate	59.2456	14.1508	0	0	0	0	0	0		0	0	0	0	0	0	0	0		0	0	0	0	0	0	0	0		0	0	0	0	60.204	8.59093	0	0		0	0	0	0	132.449	14.7011	0	0		0	0	0	0
2-hydroxy-benzoicacid methylester	9.42656	1.82407	2.78768	0.450394	6.72291	3.36959	2.55031	0.324813		7.77445	1.37529	3.71525	0.594448	8.21198	1.74037	5.83825	2.37235		8.10737	0.939737	4.45761	0.85148	7.89314	1.67781	4.64776	0.414203		7.77481	2.77876	4.8331	0.538061	6.07208	2.22759	5.01299	2.0684		6.6137	2.43006	6.52127	3.42762	4.44257	1.6464	4.26208	2.40172		3.53491	0.744515	6.26172	2.32176
2-methoxy-4-(1-propenyl)-phenol	0	0	0	0	0	0	0	0		0	0	0	0	0	0	1.30953	0.622863		0	0	0	0	0	0	0	0		0	0	0	0	0	0	0	0		0	0	0	0	0	0	0	0		0	0	0	0
12-methyl-tetradecanoicacid	0	0	0	0	0	0	30.1956	1.92851		0	0	0	0	0	0	0	0		0	0	0	0	0	0	0	0		0	0	0	0	0	0	0	0		0	0	0	0	0	0	0	0		0	0	0	0
diphenylmethanone	0	0	0	0	0	0	0	0		1.25085	0.561967	0	0	0	0	0	0		0	0	0	0	0	0	0	0		0	0	0	0	0	0	0	0		0	0	0	0	0	0	0	0		0	0	0	0
3,3-diphenyl-2-propenenitrile	0	0	0	0	0	0	0	0		0	0	0	0	0	0	2.5674	0.583504		0	0	0	0	0	0	0	0		0	0	0	0	0	0	0	0		0	0	0	0	0	0	0	0		0	0	0	0
benzeneacetonitrile	0	0	0	0	0	0	0	0		0	0	0	0	0	0	1.0073	0.159179		0	0	0	0	4.79511	1.27319	0	0		0	0	0	0	26.0997	8.37522	16.6481	4.58935		0	0	0	0	9.77437	4.67679	15.3821	6.78127		0	0	0	0
[truncated: 4 more columns]
