# Supplementary material for: Mycorrhiza-Tree-Herbivore Interactions: Alterations in Poplar Metabolome and Volatilome
Source: Metabolites. 2022 Jan 19;12(2):93. doi: 10.3390/metabo12020093 (PMC8880370; doi:10.3390/metabo12020093)
Supplement: Supplementary file 1 [file metabolites-12-00093-s001.zip › Supplementary Table S4.xlsx]

## Sheet: Characteristics of VOCs 
Supplemental Table S4 : Characteristics of the volatile organic compounds (VOCs) sampled from poplar trees.
CAS: Chemical Abstracts Service
RT: retention time
I: retention index
m/z: mass to charge ratio
Compound name	CAS registry no.	RT	I	1st m/z	Absolute abundance (%) of 1st m/z
Monoterpenes
camphene	79-92-5	15.82	860	93	100
alpha-pinene	80-56-8	17.04	894	93	100
limonene	138-86-3	19.29	957	93	100
(E)-beta-ocimene	3779-61-1	19.93	975	93	100
gamma-terpinene	99-85-4	20.59	993	93	100
(Z)-sabinenehydrate	546-79-2	21.22	1010	43	100
linalool	78-70-6	22.43	1044	71	100
neo-allo-ocimene	7216-56-0	23.68	1079	93	100
Sesquiterpenes
alpha-cubebene	17699-14-8	33.3	1347	161	100
alpha-copaene	3856-25-5	34.52	1381	161	100
beta-bourbonene	5208-59-3	34.88	1391	81	100
germacrene D	23986-74-5	36.21	1428	161	100
beta-caryophyllene	87-44-5	36.33	1431	93	100
alpha-humulene	6753-98-6	37.68	1469	93	100
alpha-amorphene	23515-88-0	38.28	1486	105	100
(E,E)-alpha-farnesene	502-61-4	39.04	1507	41	100
beta-selinene	17066-67-0	39.08	1508	93	100
delta-cadinene	483-76-1	39.55	1521	161	100
Other Terpenoids
(E)-4,8-dimethyl-1,3,7-nonatriene	19945-61-0	23	1060	69	100
geranylacetone	3796-70-1	37.01	1450	43	100
epsilon-muurolene	1136-29-4	37.5	1464	161	100
1,1,4,8-tetramethyl-4,7,10-cycloundecatriene	/	37.68	1469	/	/
Others
(E)-2-hexenal	6728-26-3	11.82	749	41	100
(Z)-3-hexenol	928-96-1	11.92	751	41	100
(E)-2-heptenal	18829-55-5	15.94	863	41	100
(Z)-3-hexen-1-ol acetate	3681-71-8	17.98	920	43	100
corylone	80-71-7	17.04	951	112	100
salicylicaldehyde	90-02-8	20.05	978	119	100
benzeneethanol	60-12-8	23.17	1065	91	100
benzeneacetonitrile	140-29-4	24.27	1095	117	100
2-hydroxy-benzoicacid methylester	119-36-8	26.76	1165	120	100
2-phenoxy-ethanol	122-99-6	27.9	1196	94	100
2-methoxy-4-(1-propenyl)-phenol	97-54-1	33.3	1347	164	100
diphenylmethanone	119-61-9	42.3	1597	105	100
12-methyl-tetradecanoicacid	5502-94-3	43.84	1640	74	100
3,3-diphenyl-2-propenenitrile	3531-24-6	45.87	1697	205	100
