# Supplementary material for: Mycorrhiza-Tree-Herbivore Interactions: Alterations in Poplar Metabolome and Volatilome
Source: Metabolites. 2022 Jan 19;12(2):93. doi: 10.3390/metabo12020093 (PMC8880370; doi:10.3390/metabo12020093)
Supplement: Supplementary file 1 [file metabolites-12-00093-s001.zip › Supplementary Table S5.xlsx]

## Sheet: leaves positive
Supplementary Table S5: All the metabolites detected by LC-MS in negative and positive modes
RT min: retention time
m.z: mass-to-charge ratio
Peak #	RT Min	m/z	1	2	3	4	5	6	7	8	9	10	11	12	13	14	15	16	17	18	19	20	21	22	23	24	25	26	27	28	29	30	31	32	33	34	35	36	37	38	39	40	41	42	43	44	45	46	47
alias			4_C1_C_U	4_C2_C_U	4_C3_C_U	4_C4_C_U	4_C1_M_U	4_C2_M_U	4_C3_M_U	4_C4_M_U	4_C1_C_L	4_C2_C_L	4_C3_C_L	4_C4_C_L	4_C1_M_L	4_C2_M_L	4_C3_M_L	4_C4_M_L	8_C1_C_U	8_C2_C_U	8_C3_C_U	8_C4_C_U	8_C1_M_U	8_C2_M_U	8_C3_M_U	8_C4_M_U	8_C1_C_L	8_C2_C_L	8_C3_C_L	8_C4_C_L	8_C1_M_L	8_C2_M_L	8_C3_M_L	8_C4_M_L	14_C1_C_U	14_C2_C_U	14_C3_C_U	14_C4_C_U	14_C1_M_U	14_C2_M_U	14_C3_M_U	14_C4_M_U	14_C1_C_L	14_C2_C_L	14_C3_C_L	14_C4_C_L	14_C1_M_L	14_C2_M_L	14_C3_M_L
day upon start of herbivory			4	4	4	4	4	4	4	4	4	4	4	4	4	4	4	4	8	8	8	8	8	8	8	8	8	8	8	8	8	8	8	8	14	14	14	14	14	14	14	14	14	14	14	14	14	14	14
myccorhized N: no; M:yes			N	N	N	N	N	N	N	N	N	N	N	N	N	N	N	N	N	N	N	N	N	N	N	N	N	N	N	N	N	N	N	N	N	N	N	N	N	N	N	N	N	N	N	N	N	N	N
infested C: no; B: yes			C	C	C	C	B	B	B	B	C	C	C	C	B	B	B	B	C	C	C	C	B	B	B	B	C	C	C	C	B	B	B	B	C	C	C	C	B	B	B	B	C	C	C	C	B	B	B
Class ID			NC	NC	NC	NC	NB	NB	NB	NB	NC	NC	NC	NC	NB	NB	NB	NB	NC	NC	NC	NC	NB	NB	NB	NB	NC	NC	NC	NC	NB	NB	NB	NB	NC	NC	NC	NC	NB	NB	NB	NB	NC	NC	NC	NC	NB	NB	NB
leaf age: U: young; L: old			U	U	U	U	U	U	U	U	L	L	L	L	L	L	L	L	U	U	U	U	U	U	U	U	L	L	L	L	L	L	L	L	U	U	U	U	U	U	U	U	L	L	L	L	L	L	L
RT Alignment Quality			63.7382	19.3913	21.0221	33.5477	17.1965	18.7013	9.18066	41.2593	14.2547	21.4438	15.3859	9.07282	7.8289	48.3243	19.8086	71.8613	56.9898	20.0214	31.607	70.5653	52.4904	44.4287	48.5996	11.534	44.5275	12.7968	14.4984	22.9147	14.8201	56.8179	47.8019	32.4334	9.9363	10.1348	93.6406	9.39037	4.18116	22.9872	32.5645	55.5622	54.6607	19.0756	10.3055	39.9132	27.0439	49.8341	21.6132
Maximum RT Shift			0.212113	0.371785	0.34651	0.193687	0.214792	0.354993	0.272543	0.194693	0.160131	0.267875	0.101264	0.220812	0.156681	0.0344006	0.0876551	0.42046	0.474401	0.077696	0.0525127	0.422358	0.04882	0.352063	0.119671	0.205971	0.356214	0.279695	0.271162	0.33002	0.0680777	0.528151	0.186147	0.181038	0.207821	0.363678	0.0656782	0.388501	0.150174	0.271057	0.347801	0.0486044	0.146617	0.0747521	0.15481	0.16345	0.253011	0.336536	0.0665136
Peak_00008	4.23995	48.66	256.749	204.807	315.329	241.862	339.506	269.675	233.65	242.853	200	143.07	114.278	182.567	56.6466	200	200	200	216.551	206.977	241.766	261.214	290.417	327.497	256.431	203.737	173.491	112.52	200	143.062	146.457	200	81.2802	167.693	248.23	331.833	231.894	256.103	283.069	218.776	247.244	276.342	200	200	150.731	200	200	200	7.36345
Peak_00009	4.23995	48.7405	267.183	257.235	331.899	282.279	384.294	265.376	225.823	303.557	200	200	198.896	165.417	152.52	200	200	200	224.288	186.051	249.215	229.55	302.575	412.27	310.096	247.472	125.708	194.666	81.7075	91.8452	175.783	134.672	112.326	194.493	244.755	277.19	321.241	391.321	265.273	243.15	340.618	312.287	200	200	153.893	114.131	155.418	200	200
Peak_00010	4.23995	49.0338	380.605	344.663	316.77	358.277	409.44	333.287	334.127	405.139	177.804	200	180.388	301.086	124.278	141.519	136.162	188.689	278.709	362.967	295.228	324.437	398.78	337.118	379.732	311.335	173.136	148.945	215.23	183.414	219.104	152.345	165.732	202.645	365.527	381.319	326.315	370.443	278.714	356.014	314.993	364.325	200	96.2075	191.593	176.2	152.578	200	81.9436
Peak_00011	4.23995	49.1114	338.254	224.67	266.791	290.115	346.982	262.175	285.454	348.63	200	200	152.112	184.184	146.778	200	39.6079	241.482	218.753	193.597	307.471	286.465	269.814	213.94	319.57	243.978	132.827	93.3987	122.144	150.738	150.202	102.045	179.438	325.127	286.004	304.242	307.811	359.501	274.843	257.437	338.671	352.493	200	200	139.629	206.887	135.839	200	200
Peak_00012	4.25673	49.1954	245.226	222.944	207.571	219.344	246.364	212.087	214.358	239.755	200	200	200	97.0075	89.3912	200	98.5832	200	181.505	165.823	273.268	224.647	225.87	263.263	215.077	210.871	136.097	200	68.8358	200	137.799	200	200	128.819	209.662	215.641	253.799	244.429	216.276	201.628	222.956	278.128	200	200	172.694	110.555	200	200	200
Peak_00019	4.23995	50.1362	259.035	267.842	252.796	246.325	362.957	257.248	237.769	241.477	200	200	200	162.157	200	200	200	200	268.729	168.033	242.73	226.989	308.719	235.09	298.897	196.016	139.506	200	200	103.969	159.542	132.93	118.625	257.743	253.463	299.536	309.518	274.837	232.378	235.186	229.857	313.472	200	200	200	117.172	102.577	200	200
Peak_00021	4.23995	50.2184	313.429	293.022	260.856	306.16	305.289	247.13	218.664	311.842	200	200	155.631	196.306	121.111	200	200	200	238.229	197.531	252.839	288.007	348.855	341.989	293.182	231.345	139.889	200	99.576	170.352	211.29	130.05	130.401	252.028	249.207	270.012	301.298	298.971	244.816	268.42	256.631	353.958	122.442	200	126.266	131.188	200	200	200
Peak_00024	4.29031	50.3002	333.501	271.116	256.759	289.726	317.791	301.291	236.678	263.473	200	200	197.92	180.471	124.087	86.91	200	200	212.308	216.878	244.566	345.505	364.501	191.381	290.898	233.708	130.096	113.834	135.152	156.432	179.82	151.85	108.043	221.111	301.628	293.533	354.767	335.027	289.167	258.537	370.199	344.307	200	84.6331	166.601	164.953	107.108	200	134.627
Peak_00025	4.23995	50.5133	376.712	382.04	349.65	395.825	361.693	372.868	312.903	378.464	200	200	181.122	170.235	140.647	200	200	111.441	231.972	209.79	270.52	342.809	386.537	198.168	338.655	304.966	197.346	193.799	131.263	171.329	249.758	130.966	175.543	312.954	346.628	360.885	356.732	380.786	311.259	342.365	394.957	370.715	200	159.296	232.691	183.058	164.12	152.14	152.894
Peak_00026	4.23995	50.5939	306.028	277.454	350.359	290.255	327.045	257.481	303.409	276.1	200	200	146.36	217.376	167.46	200	114.582	169.514	212.766	212.223	268.205	284.343	307.838	300.662	370.16	313.012	175.946	138.783	164.445	189.236	161.464	160.689	209.653	267.747	313.912	338.287	298.02	349.813	293.072	283.946	303.521	330.196	200	96.941	208.401	186.036	98.7111	176.262	200
Peak_00027	4.23995	50.6778	230.947	238.474	227.314	249.538	346.129	224.227	239.117	243.909	200	200	78.9964	220.468	200	200	107.371	159.096	179.302	148.521	169.341	249.709	192.466	246.114	220.565	184.167	61.6343	200	200	112.314	200	200	124.915	172.122	226.217	245.639	216.448	267.14	236.443	218.753	240.042	260.017	200	53.4969	200	129.783	200	200	200
Peak_00031	4.25673	51.4716	232.19	217.504	247.849	235.4	285.134	223.031	196.41	282.743	200	200	200	119.113	127.516	200	200	200	161.831	143.158	229.364	317.852	287.987	373.13	224.733	207.657	96.0466	200	54.6446	121.763	136.182	200	24.6715	184.933	247.26	246.037	225.573	266.486	183.236	202.673	250.351	293.428	200	200	200	95.0149	200	200	200
Peak_00032	4.23995	51.547	492.982	379.65	436.982	434.655	495.845	464.885	444.693	525.153	167.025	194.13	285.453	281.65	211.931	162.686	221.471	259.579	337.641	378.718	378.13	438.077	523.181	320.973	515.839	331.546	270.258	124.824	214.53	268.715	350.68	194.223	260.919	353.437	572.123	454.658	504.861	524.307	405.337	483.738	515.972	576.763	141.678	149.025	285.643	220.349	201.154	220.405	200.649
Peak_00033	4.23995	51.6307	693.811	776.164	724.326	690.06	679.812	587.561	552.912	765.498	230.333	230.823	345.874	432.603	337.921	276.534	254.934	359.109	586.795	413.608	498.741	658.577	710.263	505.141	743.024	581.488	329.72	307.34	312.377	322.769	467.819	367.787	330.857	475.425	692.849	733.451	668.028	802.288	596.729	612.865	768.879	758.142	138.333	218.742	371.385	360.992	225.669	199.428	318.245
Peak_00034	4.39098	51.7131	521.59	488.106	564.331	436.374	542.763	451.37	495.169	589.711	88.3011	74.9746	172.846	252.7	178.705	114.11	129.514	103.8	305.74	370.756	458.666	544.472	545.26	378.027	528.739	385.681	212.193	160.827	190.633	177.335	174.228	167.124	184.201	347.084	487.625	563.801	558.442	642.718	326.982	518.79	531.469	514.276	200	92.3766	291.975	195.478	75.2899	112.632	141.891
Peak_00035	4.29031	51.7145	748.503	585.47	781.871	844.788	893.145	720.031	670.432	677.631	299.142	217.971	325.353	494.391	365.899	281.574	309.361	286.106	584.904	498.026	629.345	741.737	728.351	587.031	761.068	627.784	335.4	333.006	379.153	386.691	457.076	288.876	331.73	573.879	815.585	711.725	769.948	810.849	627.68	643.019	759.299	794.337	177.022	185.379	462.468	338.35	278.486	226.153	350.919
Peak_00036	4.23995	51.7949	679.085	716.547	781.026	716.674	907.507	664.104	607.998	848.859	239.656	267.706	415.558	410.682	325.638	281.862	303.692	297.099	685.359	495.688	704.014	687.489	811.998	607.906	772.195	625.196	397.463	319.879	350.062	420.943	465.085	305.827	366.145	552.535	643.74	654.493	696.703	878.25	623.907	610.266	733.229	720.343	101.583	208.488	373.048	309.796	287.063	197.349	378.831
Peak_00037	4.32389	51.7973	847.825	769.567	764.877	708.141	847.855	650.235	628.506	810.626	251.865	209.549	384.784	515.333	341.711	236.916	272.464	243.791	633.735	511.47	656.408	712.62	782.816	591.225	758.209	641.561	390	357.671	359.071	385.79	433.074	315.468	378.466	527.303	717.451	720.158	757.74	857.212	620.095	683.662	785.097	794.155	165.545	268.745	397.443	362.643	273.103	216.52	295.535
Peak_00038	4.42465	51.7955	358.231	251.889	337.191	324.011	396.29	302.04	255.084	440.198	200	37.8417	117.466	124.239	119.872	32.0947	42.5345	63.2547	248.071	258.656	295.877	430.249	369.473	199.635	406.68	277.555	64.7903	69.434	105.249	102.197	109.197	76.9788	64.9277	173.914	313.505	377.633	281.692	406.926	254.475	254.104	353.421	376.21	200	45.3942	124.38	88.3861	11.376	23.324	72.4835
Peak_00039	4.3741	52.0133	807.436	737.307	745.283	695.735	849.819	570.983	759.373	824.955	174.016	177.13	262.146	448.852	230.238	229.321	259.265	188.041	593.295	531.326	690.197	757.406	762.775	503.99	756.367	681.073	392.651	240.11	288.017	339.256	329.976	262.092	356.752	510.09	670.193	687.644	780.804	828.29	648.568	697.434	794.49	891.212	149.108	177.273	316.255	326.191	294.679	178.256	251.61
Peak_00040	4.23995	52.098	933.121	829.137	911.01	803.197	1006.11	729.946	799.131	905.682	278.1	273.661	492.695	587.981	407.69	326.824	431.413	379.763	659.748	586.999	715.482	754.053	918.145	596.653	822.434	738.205	386.256	320.195	430.174	438.909	553.478	421.368	522.765	643.826	964.328	921.626	890.422	991.884	723.789	725.221	891.865	940.259	237.463	274.958	461.47	493.091	307.938	402.82	356.7
Peak_00041	4.23995	52.1841	629.977	579.856	621.568	595.461	752.768	569.803	542.386	644.225	263.68	172.139	385.916	445.087	287.052	251.859	239.759	172.635	543.133	461.505	569.398	717.148	554.744	458.864	600.769	583.669	307.279	264.396	310.785	308.569	397.375	310.659	298.881	499.668	644.606	681.873	662.264	722.312	544.516	544.602	685.03	745.698	125.626	236.313	329.373	332.146	288.117	248.708	215.453
Peak_00042	4.23995	52.2685	432.826	425.532	444.59	408.341	560.382	347.259	352.68	451.928	200	200	204.711	262.887	205.12	151.34	133.184	126.436	265.156	305.413	366.047	395.442	366.999	316.115	350.085	357.051	200.089	156.685	147.442	183.255	221.576	225.997	188.925	302.939	412.554	455.919	420.642	547.721	367.714	379.887	474.303	428.866	200	111.529	334.091	207.268	134.976	170.402	192.936
Peak_00043	4.23995	52.3495	246.773	193.985	223.792	234.786	277.98	186.852	242.186	305.243	137.954	200	74.4894	127.391	200	200	200	200	148.578	144.889	222.67	204.956	266.174	195.01	285.804	155.306	200	73.4943	109.032	133.454	133.373	200	121.286	193.422	215.616	262.232	228.593	266.827	204.847	204.773	262.803	299.302	89.7348	200	136.585	159.26	200	200	109.884
Peak_00051	4.3741	53.3039	175.224	140.987	137.323	184.905	225.996	150.502	117.581	186.171	200	200	137.584	163.692	82.076	200	64.2036	121.043	121.595	94.9752	136.048	222.279	190.584	79.8861	76.141	114.292	11.672	200	53.4642	64.6071	200	54.4301	46.2317	107.128	113.174	151.891	163.562	192.099	114.442	118.703	138.456	175.133	200	200	200	200	28.4128	200	200
Peak_00052	4.25673	53.3075	150.992	163.688	175.505	254.319	218.093	172.602	112.468	157.723	200	200	116.486	70.199	109.241	200	93.2168	159.6	161.564	111.865	188.188	243.131	162.661	137.261	168.095	188.886	116.449	200	89.0439	90.5906	200	58.0612	131.083	160.791	197.459	217.923	188.221	182.45	163.953	180.184	152.77	195.74	200	113.072	8.66111	140.878	114.273	200	200
Peak_00053	4.23995	53.3969	258.416	273.087	293.903	302.785	331.507	283.466	209.018	327.743	140.632	139.212	208.298	233.01	204.445	134.247	162.002	193.416	228.4	208.728	294.785	296.376	305.346	126.846	302.223	263.092	197.894	182.708	136.288	67.4858	166.071	156.502	152.021	238.04	260.157	312.767	280.377	287.058	222.034	256.878	273.303	296.612	200	114.051	236.007	176.348	169.829	175.817	155.121
Peak_00054	4.23995	53.4818	323.182	281.792	247.744	302.219	353.441	235.16	306.578	280.467	205.272	137.91	222.291	276.855	203.065	180.528	206.741	158.363	279.699	247.913	237.732	264.415	296.331	195.892	294.69	351.522	179.71	177.562	174.95	201.377	237.516	164.348	256.341	249.471	363.895	328.371	356.041	320.334	333.096	322.122	286.215	344.379	92.3978	129.436	310.936	192.001	174.729	101.895	161.125
Peak_00055	4.42465	53.7853	166.316	113.094	181.162	122.717	225.275	122.69	108.864	152.896	200	200	42.0181	91.4222	200	35.9144	33.0437	24.8925	88.0574	100.944	78.9408	214.584	240.022	155.415	146.931	144.14	41.04	45.232	200	19.8456	52.8222	39.0345	200	131.871	126.956	147.783	133.081	135.192	129.833	158.87	136.646	143.809	200	200	91.0348	200	13.5594	200	200
Peak_00056	4.23995	53.79	209.328	232.115	195.799	239.068	318.664	127.247	138.771	196.953	36.0591	121.156	130.791	175.56	181.16	110.525	104.833	105.521	210.869	127.266	200.694	152.486	162.823	211.17	260.011	153.084	120.297	115.401	124.415	176.533	194.804	128.514	114.304	161.277	152.46	233.698	196.964	183.815	207.012	234.941	198.381	248.165	95.9454	85.1825	128.242	107.853	133.025	68.3457	138.577
Peak_00057	4.23995	53.8705	356.9	283.367	291.482	270.906	390.044	315.098	276.666	302.561	163.486	169.877	221.509	231.848	236.25	190.834	161.152	105.486	278.182	236.188	266.696	234.21	279.199	195.726	298.339	210.278	176.225	167.857	106.575	182.53	243.304	172.012	151.458	247.49	270.719	321.945	317.617	285.898	296.997	259.184	310.576	338.545	78.8928	99.9033	215.513	211.995	172.358	160.067	183.103
Peak_00058	4.23995	53.9552	242.556	205.977	204.357	296.619	287.838	238.991	209.834	225.096	133.128	162.469	189.584	156.208	257.295	131.033	177.685	200	223.07	188.726	278.601	247.156	244.746	252.071	270.345	195.667	160.79	141.094	183.32	166.038	263.055	171.981	200.619	286.759	240.214	245.884	276.863	236.824	247.877	248.905	195.849	294.553	175.644	102.302	224.78	137.255	156.043	204.144	156.944
Peak_00059	4.25673	54.0418	157.912	142.146	213.739	165.067	244.947	228.851	150.584	224.946	200	200	109.424	145.677	142.094	200	200	200	126.814	116.024	141.956	226.406	166.774	230.988	171.622	183.549	190.847	200	47.51	175.718	158.311	70.8581	111.796	135.864	187.389	191.295	241.23	169.616	213.427	198.783	184.815	219.305	116.796	200	134.868	111.781	81.159	200	200
Peak_00064	4.25673	54.9322	125.201	130.187	130.991	181.814	312.278	136.769	167.635	157.429	200	200	5.43549	124.291	13.0185	143.725	200	120.111	214.652	78.517	190.55	153.246	152.65	118.754	126.605	127.994	124.687	200	200	70.1725	165.23	85.6089	145.967	126.029	111.851	149.416	168.182	150.572	158.739	176.234	131.218	183.669	86.3154	90.3649	157.699	44.7582	144.345	79.5761	200
Peak_00065	4.25673	55.0201	160.103	150.795	153.931	142.956	212.029	148.313	155.014	149.605	161.702	200	115.481	136.96	127.014	123.54	59.8947	105.76	241.228	139.528	151.203	132.015	154.815	203.04	162.406	176.775	151.352	73.6775	200	90.4011	133.231	154.31	104.305	152.897	126.709	130.991	121.521	135.746	191.06	134.953	157.753	201.549	122.293	114.315	202.445	151.48	117.527	125.108	200
Peak_00066	4.25673	55.3215	192.921	181.831	143.867	210.763	271.038	177.33	164.453	191.961	136.157	20.5805	130.461	159.425	148.615	125.838	143.168	230.585	160.221	182.989	217.869	161.475	184.666	161.733	180.344	209.273	168.654	123.19	200	188.191	189.765	71.3557	134.045	152.546	163.83	206.858	223.355	174.39	165.637	175.993	156.041	207.693	103.909	121.341	161.532	169.126	91.7503	200	263.983
Peak_00067	4.25673	55.4108	144.048	152.988	103.197	152.967	154.367	174.862	182.9	140.063	117.183	107.049	200	115.31	139.565	120.974	174.363	62.9229	177.79	112.463	186.581	196.26	169.169	207.431	177.708	123.014	185.114	200	200	113.121	169.829	154.402	96.1131	147.835	148.911	158.512	154.626	171.19	153.12	141.906	153.974	178.73	200	125.646	150.307	123.523	159.413	150.786	120.367
Peak_00068	4.27352	55.4945	122.645	167.37	123.244	91.0815	197.427	157.517	31.9116	136.021	87.9885	200	97.112	114.595	80.1519	200	200	200	181.997	109.678	148.355	201.613	133.75	87.7902	151.156	200	181.474	200	200	94.653	148.275	127.156	114.776	119.797	154.075	93.2268	131.865	177.184	123.269	119.076	89.4909	177.877	56.5389	58.4504	143.753	117.606	123.991	200	70.6221
Peak_00093	0.532388	73.5334	1970.87	2490.43	2775.18	1559.93	200	2270.84	2478.52	2944.63	4324.07	2037.69	4071.19	4469.96	2345.32	2480.35	3143.72	3564.56	3006.51	3610.45	2263.54	4112.92	2885.48	200	2909.59	1974.93	3283.8	3592.74	3613.51	2824.08	5976.03	3232.41	3622.15	4055.1	2317.77	3169.85	3364.68	2636.49	3840.93	2811.54	3291.2	5166.77	3570.69	2827.27	6908.59	3680.92	3744.62	4399.47	4066.86
Peak_00135	0.532388	82.5385	2773.64	2789.46	3475.49	3143.82	5888.21	2822.04	2989.65	2862.97	5110.31	2294.39	3975.01	6024.37	4288.15	2856	4298.21	4396.53	4934.74	4241.27	2994.21	5418.25	3379.68	2688.43	3174.51	1974.08	3974.63	3980.74	3962.79	3180.82	6368.07	4001.8	3954.99	3947.86	2813.61	4078.22	4735.47	3559.15	4915.01	3047.04	3892.19	5665.98	4474.47	3171.53	6416.6	4050.83	4210.07	4976.43	5100.18
Peak_00195	4.23995	102.964	269.873	227.899	273.627	279.771	310.222	282.183	235.167	289.266	200	200	218.175	174.373	69.7339	200	200	200	239.84	153.335	241.292	300.7	314.922	278.703	300.111	252.244	158.358	101.659	200	201.155	129.039	149.957	171.435	233.58	312.133	261.231	294.164	326.873	258.622	236.058	329.473	304.621	200	200	200	90.6328	45.7054	200	200
Peak_00198	4.23995	103.076	464.831	358.236	429.317	481.298	556.558	454.183	370.623	476.07	184.244	118.029	212.19	291.865	153.931	165.489	116.698	176.843	376.298	363.962	422.49	476.123	448.811	364.371	464.631	439.824	210.074	157.895	163.05	232.259	244.663	213.171	221.474	322.194	432.447	447.779	512.78	550.504	339.217	428.36	481.792	501.225	200	170.532	243.076	277.784	157.983	146.329	170.559
Peak_00199	4.23995	103.181	558.265	504.593	590.439	512.089	574.269	414.373	481.117	636.626	180.126	153.393	264.335	302.019	234.394	144.604	186.164	200	435.352	397.452	508.167	573.908	523.835	475.855	491.228	475.383	240.598	180.786	195.508	246.204	311.001	237.668	243.267	381.336	475.819	549.807	537.769	719.192	465.889	478.66	468.726	597.211	137.886	130.344	259.012	280.153	234.138	18.2813	238.289
Peak_00200	4.23995	103.295	650.795	653.765	630.17	561.939	704.399	583.035	468.423	735.71	230.229	162.186	299.262	341.443	241.331	212.253	251.987	228.275	516.808	462.534	643.465	660.028	641.321	416.421	644.903	464.844	303.524	221.558	239.871	248.444	399.292	251.667	364.339	440.775	530.57	608.521	631.533	645.112	559.998	535.482	648.598	668.009	151.731	180.316	272.444	281.919	252.012	169.202	236.065
Peak_00201	4.27352	103.516	630.725	613.149	705.585	565.279	851.988	531.573	563.611	790.588	256.816	180.507	405.138	380.747	279.739	200.599	257.241	180.343	480.219	429.057	515.468	660.081	727.955	459.468	685.544	631.679	305.814	229.984	321.729	297.095	381.912	294.176	294.175	467.375	745.3	696.804	623.932	716.648	564.006	588.439	630.108	708.768	113.894	187.809	316.168	356.951	261.094	179.799	288.746
Peak_00204	4.23995	103.736	664.699	594.616	662.814	665.733	780.595	533.337	581.626	682.438	189.165	165.159	305.94	334.193	325.795	270.64	272.624	233.956	527.552	590.116	645.893	648.95	627.881	563.928	597.664	543.684	311.216	256.929	251.252	287.349	439.255	315.177	287.327	496.899	663.748	623.101	677.398	881.926	541.411	541.123	715.721	693.033	141.971	178.288	351.04	329.155	257.137	218.517	284.013
Peak_00205	4.23995	103.843	499.687	450.714	474.661	458.432	490.598	355.316	435.907	518.714	200	114.126	251.356	294.393	199.431	160.838	163.678	204.485	462.167	363.68	450.331	557.969	579.735	399.334	476.788	416.671	258.244	124.437	187.19	287.127	268.58	217.963	277.455	332.845	471.969	452.652	539.273	578.078	452.263	427.4	516.858	574.037	200	149.448	254.215	205.514	155.525	200	201.192
Peak_00206	4.23995	103.96	374.446	340.533	395.861	345.984	413.708	303.081	331.596	333.818	180.339	71.604	187.531	200.301	181.142	108.88	155.526	194.733	227.037	223.29	379.018	374.326	405.931	365.523	398.187	279.135	177.017	110.13	200	204.796	203.418	185.099	137.058	269.923	372.55	336.512	413.845	415.119	302.79	313.925	339.178	358.248	79.2111	118.888	211.43	174.85	118.442	200	159.158
Peak_00209	0.631247	104.108	11431.4	5396.33	13412.7	9530.56	10626	18005.6	19092.1	15543.3	3921.67	3500.22	9425.1	9494.63	9410.73	2421.45	6080.84	2777.06	16208.7	7558.24	4836.42	5799.2	11998.7	200	6944.65	5650.77	5963.75	4549.86	6717.97	3074.9	9426.18	4395.73	2960.84	7983.48	4453.47	4944.8	3677.52	10101.7	9412.95	4341.28	8793.73	20545.2	2942.39	2875.41	13831.8	4070.19	4143.93	8764	5504.68
Peak_00217	4.3741	104.957	126.718	159.784	168.973	158.822	167.846	100.712	209.646	157.821	200	200	72.915	100.561	200	200	200	200	113.703	105.228	202.962	176.219	189.845	155.265	161.466	215.362	88.8384	76.2614	200	36.2273	43.9128	200	46.6159	67.8264	134.066	147.704	134.851	133.424	92.9462	126.593	123.617	198.804	200	200	200	200	200	200	200
Peak_00220	4.15622	105.035	27455.3	30626.3	18595.1	31076.1	36982.5	24521.5	27700.3	26522.8	18956	17146.1	19038.6	26157.8	18476.5	20999.7	21800.6	13183.4	16196.5	11159.9	15885	16298.4	24601.8	13033.6	31894.2	20799.3	29116.6	23162.2	18844.8	18233.2	20712.7	28619.7	28804.5	27028.6	30298	27707.2	31746.7	34541.2	24677.7	34284.3	33220.2	32236.7	26869.6	22561.4	27582.5	29882.1	22266.6	18198.5	14063
Peak_00229	4.25673	105.399	153.048	156.278	166.409	218.762	212.441	159.329	192.202	245.516	200	200	200	156.468	134.282	200	200	200	238.656	159.854	148.113	181.227	162.928	182.719	189.209	131.456	85.96	111.392	200	200	201.899	73.7637	200	133.187	162.756	186.965	235.904	224.34	137.644	173.294	162.32	271.484	200	200	200	88.1596	99.8773	200	44.7721
Peak_00231	4.25673	105.518	208.558	213.855	194.231	192.163	217.554	121.339	209.724	197.494	200	200	98.4257	145.423	129.891	200	200	200	109.094	145.096	189.86	207.97	212.451	273.993	255.592	177.185	83.7316	200	200	158.379	196.092	96.1403	133.308	111.975	211.022	218.099	222.966	225.845	139.36	170.434	193.252	184.691	200	112.343	159.588	115.146	113.282	200	173.987
Peak_00235	4.25673	105.624	231.915	216.284	213.924	247.814	230.545	180.325	194.432	204.702	136.809	200	199.258	168.788	200	200	200	200	197.572	125.42	166.59	179.533	187.521	293.531	188.693	160.146	124.916	200	200	133.077	145.928	98.0502	165.166	140.163	186.515	167.212	211.222	191.169	157.838	193.697	202.496	278.144	200	200	142.469	123.46	146.291	83.8858	113.934
Peak_00238	4.25673	105.735	226.099	160.376	264.374	176.667	229.521	158.513	181.889	211.107	200	124.234	64.9299	91.1914	95.9611	107.379	200	200	148.742	123.65	137.021	148.13	213.715	202.54	211.996	198.27	133.8	200	200	122.33	158.12	200	111.365	176.368	148.764	158.751	225.351	210.144	151.152	146.272	167.893	223.814	67.494	200	226.833	147.565	156.206	200	200
Peak_00241	4.25673	105.959	166.103	179.695	161.096	166.427	292.142	161.229	135.993	150.455	200	200	119.427	195.262	21.0279	200	200	200	227.467	123.566	156.534	231.953	167.007	147.328	198.336	136.077	200	76.96	200	200	87.1539	90.8592	83.3106	154.785	198.773	173.337	233.102	138.801	222.697	169.608	152.423	186.04	200	200	161.504	126.576	200	200	200
Peak_00242	4.22323	106.038	2397.74	2191.26	3139.41	2563.06	4162.89	2298.54	2277.69	2520.96	1707.1	1791.58	1997.96	2728.68	2450.09	1660.34	2101.13	2178.96	2028.04	2010.3	2440.79	2617.72	3226.05	2067.02	2184.13	2168.5	1657.3	1985.04	2277.3	1916.78	3200.28	1660.65	1787.12	1734.03	1963.64	2668.99	3148.9	2058.78	2734.09	2162.38	1789.99	3488.29	1600.11	1428.91	2956.78	1626.12	1794.99	2243.71	2509.43
Peak_00245	4.25673	106.182	138.648	163.014	167.004	153.77	216.392	136.21	135.56	195.45	200	200	200	133.831	200	200	99.8387	200	220.5	200	135.252	140.303	177.211	151.414	139.875	190.422	114.978	200	200	132.353	147.113	100.394	99.8608	146.255	145.131	149.994	224.654	221.621	160.515	116.319	156.662	239.538	200	200	200	228.61	200	127.235	88.1333
Peak_00254	2.35009	107.05	2264.38	200	1765.52	2058.85	2072.24	2072.58	2298.92	2152.14	910.85	1995.65	1366.15	1700.14	1457.28	1486.96	1148	998.905	1163.1	1639.02	1283.04	200	1357.58	200	2534.45	1911.83	1797.05	2128.26	1473.96	200	798.964	1833.31	2174.55	1864.36	2281.13	2207.62	1952.36	2903.11	1516.27	2091.74	1825.97	1806.02	200	200	1341.37	200	1285.53	748.777	854.759
Peak_00255	2.54452	107.05	4423.95	3787.67	1588.57	2842.61	3352.49	4473.6	3401.92	3587.84	2175.09	2543.09	3468.35	3545.4	3346.01	3097.91	2658.71	1348.03	2690.5	1936.79	2122.29	1962.31	4121.38	200	4249.83	4526.92	200	3568.49	3054.14	2898.58	2094.71	3416.63	3463.35	3891.26	3892.54	2142.14	2250.59	1399.04	4404.97	3141.12	3039.11	3154.93	2539.45	6535.6	6260.56	5157.82	7245.34	3441.4	3007.18
Peak_00256	3.19454	107.05	34002.3	46246.2	24827.4	40271.5	31794.4	38695.2	45391.3	38895.9	21897.2	26883.2	25274.9	29314.8	30093.2	31786.6	28806.2	14538.3	11387.3	30046.1	35129.9	14441.3	35497	13131.1	46706	29002.9	36276.1	31613.9	27022.2	31655.7	18675.2	37728.3	35052	36268.7	40403.2	43992	40129	43616.1	41093.2	42016	39850.8	36709.6	30927	31972.8	34096.4	34922.3	34078.9	21555	22078.3
Peak_00257	4.17299	107.05	39935.4	44844	27959.9	42399.3	30287.2	35271.7	41659.6	38188.2	23119.2	28419.3	25267.1	34486.3	28408.2	30991.2	28762.8	14581	13561.5	18189.5	25862.9	17623.2	34804.3	12485.6	47990.3	34835.9	34384.3	34013.1	28966.7	29298.2	19604.8	33215	35326.5	36406	43334.9	42392.5	44042.3	43442.9	36388.1	39891.6	41073.1	35381.7	30871.5	31387.9	33217.9	36577.3	32782.3	21146.9	19158.9
Peak_00258	3.78724	107.05	2233.46	2989.13	1412.79	3192.24	1856.79	200	2852.02	200	2792.78	4420.35	2701.67	2850.41	3282.59	3716.48	2513.85	1803.58	200	1802.81	200	200	200	200	2030.49	200	3282.32	3292.29	2470.92	2332.87	1788.66	3064.7	3458.45	1903.77	2670.11	200	1567.46	200	1849.01	3075.92	200	1656.81	3257.01	3179.52	3622.15	2805.09	3473.71	2518.35	1310.35
Peak_00259	3.32882	107.075	346.124	506.341	274.544	349.833	397.403	385.423	402.213	323.435	208.713	325.208	276.611	267.178	227.391	254.675	196.118	247.369	317.532	486.323	519.818	196.856	362.525	330.313	431.313	285.271	377.891	422.053	199.152	360.97	282.856	419.255	385.401	291.004	265.217	528.022	299.543	498.644	419.081	424.457	367.705	364.609	262.201	323.127	300.602	416.374	325.255	280.026	296.757
Peak_00260	4.22323	107.076	551.644	641.556	427.833	650.98	500.394	386.927	476.031	430.264	302.673	390.736	407.05	491.634	347.245	460.069	538.82	247.088	306.644	282.625	401.544	348.235	495.021	480.491	603.842	464.021	585.322	449.191	339.042	425.374	368.875	433.274	469.002	496.347	664.803	668.07	545.249	541.53	471.127	590.886	580.126	612.989	385.579	320.347	416.075	389.166	408.891	339.098	348.445
Peak_00273	3.24489	108.053	1580.31	1883.48	2077.42	2112.3	5628.81	2283.16	2645.91	2769.85	1935.62	1679.68	1765.54	2518.31	2176.07	1753.09	2171.06	2918.74	3533.7	3455.38	2442.2	4227.04	2288.08	4129.47	2381.02	1796.76	2167.68	1815.88	1514.28	1862.02	2962.93	2229.1	1949.08	1851.12	1957.84	2967.48	3063.76	2482.84	2872.62	2166.76	2495.42	3681.3	1836.13	1560.4	3260.62	1743.89	2091.46	1600.14	3127.52
Peak_00274	4.22323	108.053	2155.58	2082.63	2726.2	2114.66	5041.53	2293.36	2479.7	2604.57	2024.44	1611.15	1993.62	2715.16	1994.15	1873.84	2332.23	2904.35	2976.39	1901.9	2079.56	2836.96	2611.45	3897.95	2356.17	1953.85	2024	2180.43	2023.38	1663.85	3113.3	1921.14	2048.48	2067.85	2241.21	2918.36	2752.21	2618.35	2706.46	2530.43	2265	3624.93	1778.61	1664.36	3398.64	1938.52	2253.4	1901.88	2248.26
Peak_00281	0.518628	110.01	35644.7	36826.7	22636	33711.3	19778.8	30668.4	32108.5	31360.4	37335	30156.9	32672.6	40011	31397.8	33794.2	27996.9	14216.1	26757.8	17010.3	24605.5	12650.5	27230.3	15381.8	37009.9	20360.1	47642.7	42125.4	40442.5	35807.4	28724.6	42971.8	46857.8	49081.6	35211.9	31754.1	35665	40872.9	33257.2	35839.1	39364.7	38214.4	49752.2	41590.3	57811.2	53605.3	45986	41381.4	27721.4
Peak_00282	0.621449	110.029	611.151	649.974	568.56	550.769	194.948	608.125	548.923	626.12	722.782	540.911	550.423	801.695	529.909	546.913	431.032	322.279	365.243	403.849	476.721	253.031	608.277	200	611.055	376.613	913.174	826.615	770.854	768.522	551.142	816.1	930.478	1034.4	510.521	469.229	429.517	763.514	697.054	755.071	703.949	785.807	1011.46	710.043	863.332	1028.05	849.646	878.056	550.943
Peak_00283	0.532388	111.011	7017.62	6656.6	5413.33	5939.66	2291.08	6526.95	6212.22	6345	7145.52	6207.23	5986.2	7828.94	7351.33	6157.54	5798.47	3181.15	4089.97	4211.01	5370.31	4057.9	5856.19	2469.53	6556.28	6155.22	7498.32	8305.58	8420.63	8034.22	5244.67	6954.84	7809.35	8606.89	5636.37	6157.48	5882.39	6600.25	6788.14	5579.48	5905.68	7054.01	7855.36	7067.22	8671.68	8495.54	8459.82	7363.59	6600.93
Peak_00285	0.532388	112.007	6110.64	5300.32	6903.81	4160.09	3863.88	6686.86	4564.36	6110.9	7214.85	6539.08	6619.76	8404.25	8199.4	5330.22	5502.6	5969.65	5897.58	5428.4	6177.46	5781.04	6355.68	200	5373.48	4457.44	4888.6	7088.33	9681.78	8567.79	7775.44	5267.07	5973.24	7286.21	4191.54	5461.65	6098.65	4581.13	6943.98	4518.89	4260.97	7260.26	5728.38	4927.95	10361.3	6528.76	7396.17	9117	8206.95
Peak_00290	0.558667	114.988	1132.75	1016.28	200	932.905	200	1009.27	1389.68	1324.1	1263.66	1292.83	1213.83	1383.43	942.724	1179.29	1024.68	1220.09	200	1688.59	200	1792.89	1184.66	200	1188.99	1125.55	1364.93	1301.57	1331.64	1588	200	1468.81	1525.4	1606.1	1363.15	200	1044.81	1321.89	1860.6	200	1713.66	861.392	1465.6	1180.47	2351.13	1664.98	1561.42	1088.53	2450.12
Peak_00295	-0.00410521	118.087	5555.03	5425.07	4869.6	5735.48	5818.04	5482.99	5739.36	5562.34	5194.53	4874.98	4652.64	6821.09	9174.76	5984.3	6494.02	5251.53	6673.73	7049.08	5622.01	6242.92	5722.14	200	5928.92	5790	7320.67	6486.16	7304.47	6215.73	6681.48	8419.59	8634.55	10253.6	4965.68	6574.71	7475.36	7964.83	7758.08	9367.17	4776.1	5788.56	7383.11	4354.89	7902.42	7209.66	5856.54	5337.55	6590.72
Peak_00296	0.730278	118.087	3824.6	3604.77	2614.39	2267.26	1685.27	2995.5	2794.47	3181.67	200	600.117	200	200	982.532	1160.98	200	200	3888.43	7370.01	4896.91	4770	3140.85	200	3425.13	3965.28	599.501	1020.95	200	200	200	486.525	879.799	1383.6	2352.28	3200.95	2451.18	2823.68	2008.16	2190.84	1893.53	2287.8	200	345.323	200	365.426	525.331	200	200
Peak_00298	3.29525	119.05	5041.22	5284.02	3325.49	4965.56	5003.7	5280.85	5310.5	5406.97	2187.8	2666.38	2836.87	3339.08	2675.18	2650.1	2982.23	1351.66	1799.01	3885.42	4902.53	1861.54	5171.22	3639.28	5562.52	3791.38	3642.25	2926.7	3420.72	3430.72	2124.24	4077.49	3522.51	3893.3	4989.29	4883.72	4730.24	5745.45	4944.6	5256.24	5934.32	4954.23	2759.53	2661.81	3593.79	3372.12	3040.1	2045.37	2097.68
Peak_00302	1.63433	120.081	4359.35	2824.66	2486.35	2168.28	3678.47	4030.04	2652.58	3716	1987.69	2048.24	2674.64	2590.66	2746.24	2247.49	1817.48	200	3999.23	4894.98	5162.55	4213.25	6420.22	2190.43	3915.85	3453.86	3133.56	3279.66	4222.19	2991.22	2893.92	2927.21	4202.48	3853.19	1950.13	3039.42	1948.35	2041.01	2226.43	2248.01	2001.94	2991.24	200	986.625	1219.31	978.241	200	200	200
Peak_00303	3.75465	121.029	1555.81	1686.16	904.759	1330.59	2384.46	1312.19	1511.99	1397.92	1336.05	1127.18	1304.81	1398.5	1062.44	1051.02	1738.44	1316.05	1669.04	609.881	200	1812.89	1137.34	1503.59	1625.8	1211.17	1532.61	1398.38	996.435	1101.28	200	1059.17	1519.42	200	1171.7	1541.37	1241.34	1870.59	1404.57	1686.41	1666.38	1913.14	1345.29	1181.08	1177.35	1344.9	1035.47	1352.64	1034.17
Peak_00311	0.631247	122.538	2089.33	1968.23	2772.24	2131.03	200	1184.05	1566.43	1483.26	4378.19	2707.53	3249.97	4798.61	2752.6	2301.03	1372.11	200	3012.45	3411.7	1988.64	200	2312.26	200	1630.39	2273.08	3304.98	4153	5595.87	4414.6	6113.52	2881.82	3093.75	3762.82	1895.04	2282.65	3791.22	2510.05	3175.22	1812.81	1854.16	3288.17	4572.09	3074.57	6812.14	4333.52	3466.16	4657.01	5278.89
Peak_00312	0.646968	122.925	3864.41	4088.31	2730.1	3477.51	1560.37	3974.84	4282.88	4037.49	1709.87	2920.75	2103.61	1851.35	3232.44	2899.65	2042.27	2812.48	1880.3	2252.29	2392.19	1788.75	3440.5	1590.39	3456.01	3201.62	200	1935.63	200	1986.9	1325.44	2460.23	2281.36	2257.19	2517.45	2953.33	1548.2	3119.52	2732.11	3781.01	2950.42	3057.9	1053.64	1281.55	1558.68	1496.58	1648.05	1277.03	1382.71
Peak_00316	2.79196	123.045	1043.53	1083.85	821.432	200	1372.09	1321.01	1103.7	866.624	738.402	946.478	1098.39	1305.48	838.631	959.373	680.531	748.414	705.424	956.639	916.921	610.954	1099.12	200	1336.25	909.766	1328.49	1266.08	1249.49	1221.57	200	200	1539.32	962.154	809.652	1096.1	1411.98	1301.12	936.333	1511.29	1129.31	744.674	970.958	1588.7	1412.14	1563.72	827.7	769.95	846.389
Peak_00320	0.654009	123.538	470.366	607.338	200	369.875	200	200	190.34	200	550.413	642.319	572.966	823.905	200	236.842	135.884	200	200	200	200	255.533	296.007	200	364.556	200	417.182	800.557	877.651	969.609	531.717	517.582	482.505	631.047	200	227.875	525.901	200	144.919	558.935	229.248	200	921.367	581.749	1212.31	822.449	693.846	802.239	1290.48
Peak_00327	0.532388	125.987	11702	9591.64	13165.1	6868.4	7849.39	12356.6	8688.18	10812.7	10241.9	7935.42	9184.68	8186.76	9732.62	6567.06	6216.84	6659.78	9164.42	12766.4	11738	7595.03	13588.1	5628.2	7981.08	7848.54	7292.3	9514.67	13279.5	8607.99	9026.04	5190.07	5597.04	7820.37	8371.49	10259.7	11096.1	6507.87	11836.7	6378.24	6051.51	11150.4	8819.24	7993.19	14867.2	8853.16	12201.4	10427.5	11604
Peak_00330	0.654009	127.04	3079.04	2570.07	2026.34	2219.55	2464.3	2336.96	2173.8	2628.14	2605.76	2414.18	3031.43	2841.47	2204.63	2089.19	1875.84	200	1554.38	1409.92	1899.23	1300.32	2145.21	665.087	2316.92	1967.45	3088.2	3310.34	3511.1	2910.23	1941.19	2951.16	3044.86	3041.68	2647.44	2133.31	2813.13	2801.5	2122.59	2032.18	2360.71	1995.07	3455.18	2620.31	3335.62	3311.54	2593.03	1813.96	1679.14
Peak_00331	4.1395	127.04	6997.68	8126.66	5292.96	7089.74	7158.21	6319.09	6540.4	7605.16	4721.4	5393.97	4784.62	6484.08	5432.04	4901.09	5051.45	2700.52	2886.04	2747.27	4530.58	3527.01	6923.81	2733.22	7774.59	5277.05	6441.69	5924.23	5381.88	5002.55	4265.2	6625.47	6584.9	6191.44	7011.36	7240.36	7835.5	7768.34	6450.78	7535.45	7056.55	6926.22	5880.55	5528.84	6893.99	6962.9	5738.22	4456.65	3513.95
Peak_00332	0.518628	128.02	28054.4	27408.4	18495.7	23279	9961.62	21625.8	21683.5	22255.2	25339.4	22773.9	23138.6	28293.3	25811	23325.3	20504.6	11804.1	14198.4	14791.5	19405.4	8138.39	21593.2	8683.39	26238.4	16358.1	30469.5	29631.3	27639.1	26843.5	16053	29513.4	30712.2	32019.3	22880.4	22920.2	25148.1	27398.5	25451.1	23029.4	25333.2	24931.8	32032.3	27536.5	34570.6	33838.4	29738.4	24467.9	20132.1
Peak_00335	0.830715	129.019	857.638	1494.78	650.624	943.295	2213.09	1152.56	1510.9	200	200	971.599	1045.6	1398.13	1019.01	1213.82	200	200	200	1215.64	1030.45	200	1185.44	200	1156.47	1469.23	1383.07	1202.74	1157.67	8.50945	200	1064.8	1356.12	1318.97	200	1274	39.1763	1247.73	1417.88	1515.5	200	1918.5	1571.41	1147.94	1591.52	1630.24	1572.13	2005.31	1564.22
Peak_00336	0.532388	129.021	4256.84	3588.16	3967.4	3427.14	2345.93	3502.39	3118.53	3369.26	4047.63	3729.96	3915.15	4592.72	4523.96	3706.88	3007.45	2237.31	2632.8	3079.5	3618.02	2972.12	3700.32	200	3319.21	200	3850.41	4170.9	4961.34	4488.07	3624.49	3635.77	4382.23	4731.46	3396.45	3737.71	3089.45	3153.16	4011.37	3123.86	3137.2	3985.37	3408.84	3606.33	5027.07	4231.86	3800.1	4589.89	4108.92
Peak_00337	0.746939	129.056	1083.2	971.808	951.063	783.401	705.514	919.133	1144.65	998.901	1063.54	1465.75	947.322	503.465	200	980.942	200	200	200	979.877	776.204	448.322	200	200	724.029	941.567	978.378	1122.97	1100.91	1316.11	746.011	905.435	855.131	1012.32	818.479	872.368	931.858	881.403	895.074	735.824	892.037	706.891	1034.61	905.816	959.002	1040.6	1052.68	1372.58	200
Peak_00343	0.532388	130.018	3071.14	2701.47	3645.4	2810.66	200	3014.23	2734.66	3145.12	4307.41	3261.32	3634.17	4314.34	4472.39	3082.99	3093.85	4373.09	4092.99	4561.07	3064.1	3464.72	3342.22	200	3162.12	2390.95	3111.7	4034.17	4202.38	4018.16	4311.51	3399	3285.81	3941.23	2358.29	3362.52	3437.02	2841.5	3622.04	2842.97	2642.33	4470.45	3188.85	3114.88	5779.53	3251.2	4225.67	4872.23	5348.89
Peak_00344	0.640272	130.051	3647.89	2278.1	1563.5	2226.81	1079.26	3441.32	2050.18	2751.49	2039.61	2202.75	2061.56	2229.72	2177.91	2457.58	1378.15	200	2091.41	1429.83	1691.5	2233.37	3057.59	888.238	2762.24	2192.96	2591.74	2696.97	2533.95	2718.85	1654.06	2222.56	2281.33	2792.8	3564.07	8421.07	2402.93	4454.28	3060.13	6164.88	3106.68	4933.62	1393.86	4007.43	1711.19	2029.05	1649.33	1865.85	1556.32
Peak_00346	0.654009	130.526	1227.92	994.235	200	200	200	938.849	800.451	200	990.781	786.669	725.046	1223.52	841.578	200	200	200	200	1113.98	763.913	200	200	200	869.871	432.677	935.673	1186.52	1539.84	868.387	1012.14	499.868	691.293	510.866	724.326	553.18	1306.22	747.468	1361.35	692.789	628.671	200	1282.33	1070.81	1722.25	1063.86	1301.7	1001.77	1601.79
Peak_00349	3.955	131.05	27280.9	24111.2	20287.2	24484.2	22736.8	25303.3	20391.7	26472.9	7461.12	7442.67	9505.75	12468.7	9364.9	10258.2	8821.97	5474.09	9234.74	12502.5	20520.6	11295	20233.3	8936.01	27139.2	19257.4	14361.4	12466.8	14465.6	15766.1	9401.29	16364.9	17133.6	18810.2	25941.3	24517.2	26790.7	29192.1	21452.7	26027.5	28389.5	24509.6	8531.37	7032.52	9716.06	12730.4	8131.7	7083.2	7574.28
Peak_00353	4.07249	131.074	241.462	303.946	235.808	242.352	191.758	340.808	314.123	341.777	200	200	107.183	155.309	200	75.8474	115.169	72.2144	166.03	171.016	202.662	370.38	223.899	244.272	235.628	369.423	116.824	86.6136	200	112.689	172.113	192.252	163.958	262.808	379.527	350.272	318.024	402.714	284.546	308.147	504.735	382.713	111.869	200	200	94.915	200	104.684	69.2964
Peak_00356	0.640272	131.543	1244.12	1453.18	1692.49	1366.69	200	1091.51	1164.3	1329.31	2369.9	2419.58	2079.01	3101.23	1732.54	1742.56	2101.72	200	200	2403.38	1282.63	200	1508.26	200	1721.76	1405.3	2457.99	3201.72	2689.31	2980.05	2912.28	1974.59	2316.31	2631.7	1125.74	1825.66	2064.49	1385.78	2320.68	1189.07	1078	1874.07	2655.69	2403.81	4416.57	2779.35	3117.8	3229.77	4135.03
Peak_00362	4.00529	132.053	1739.86	1590.68	2128.23	1986.05	3310.57	1801.42	1601.37	2635.29	200	200	200	200	713.469	200	669.822	200	2566.93	2086.57	2511.53	1837.1	1472.78	2707.92	2012.66	1535.52	1102.81	890.964	1004.74	1235.05	1648.52	1194.84	1064.55	1422.11	1846.04	2397.69	2202.72	2141.63	1989.84	1900.72	2168.94	2550.17	200	200	200	739.854	696.619	200	200
Peak_00373	0.684884	134.046	1073.22	626.221	812.148	200	200	914.276	200	711.867	200	819.719	200	932.471	688.53	512.988	200	200	841.493	754.239	647.095	924.27	1240.44	200	1029.51	1312.45	938.776	1191.92	1483.41	1323.8	200	1156.35	1207.27	1624.38	2550.6	3797.59	1805.29	2993.87	2256.76	3400.29	2277.29	3009.74	1261.04	1638.9	1392.85	1354.99	1094.28	1289.64	1066.34
Peak_00374	0.713649	134.082	2291.61	2313.66	1725.75	1320.29	1959.34	1977.18	1713.08	1957.28	689.218	200	200	1155.74	200	200	200	200	2556.06	3079.95	2005.21	2337.51	2076.63	200	1959.56	2567.8	1007.07	1452.53	1311.41	2020.22	1248.06	896.211	993.549	1436.04	2492.34	2718.47	2902.85	2648.03	1978.54	1767.04	1990.62	2187.53	200	200	1006.25	992.306	818.801	200	1178.61
Peak_00375	2.79196	135.045	832.074	799.827	872.25	1010.75	200	997.535	200	1211.68	200	1253.52	990.222	1492.87	1052.69	1234.06	832.003	200	200	687.544	1334.64	200	664.935	200	1099.51	1060.74	1533.92	1429.08	1666.26	1743.32	1058.8	1703.68	1452.82	2326.58	1004.37	1119.76	1376.69	1141.4	609.361	1168.35	1242.84	1260.3	1373.77	200	1430.92	1546.94	1179.74	1024.65	1354.54
Peak_00381	2.34321	137.024	1842.59	1866.8	1464.18	1908.98	3300.73	1930.27	2100.59	2386.7	1393.6	1112.42	2038.9	1779.37	1450.34	1175.24	1297.5	200	1823.6	1345.14	1279.05	1864.14	1722.23	200	2105.16	1377.14	1685.28	1519.05	1480.31	1289.15	1818.57	1705.66	2037.35	1908.14	1570.35	1512.31	1846.13	2196.18	1802.61	1658	1959.92	2412.6	1388.52	948.378	2219.53	1567.84	1592.29	1334.17	1461.67
Peak_00389	0.654009	138.056	12218.4	14656.4	10027.3	9347.46	3569.57	10793.1	10801.1	11096.4	14417	13566.8	13391.8	13624.8	12800	13179	11279.9	2625.43	7599.75	10119.3	14422.2	5603.65	10787.6	4959.52	14254.9	8120.46	15823.7	20743.4	17644.6	15966.2	11885.5	15350	18700.8	22517.1	13931.7	18941.6	19604.3	17200.5	12951	13056	12284.4	12066.1	13673.7	12336.3	13153.6	13366.6	14420.2	12995.1	13366.9
Peak_00390	0.746939	138.079	174.834	266.236	126.911	187.654	105.276	113.968	153.637	153.432	209.963	160.593	165.357	187.19	170.426	193.524	181.619	200	3.99655	216.364	236.063	114.48	219.785	200	162.534	200	216.689	347.057	185.945	238.192	192.447	289.677	386.64	324.064	241.699	329.49	216.793	294.98	206.076	186.014	221.959	154.327	263.972	169.698	265.622	195.678	213.543	123.11	216.084
Peak_00392	0.830715	139.003	842.352	902.466	200	762.317	200	675.243	991.853	905.133	200	200	509.179	933.715	693.492	970.248	812.488	200	200	200	647.59	200	854.575	200	200	1171.43	676.926	549.781	935.963	567.784	200	1066.36	890.633	971.811	687.213	566.63	200	705.067	968.592	771.76	953.654	786.666	892.156	886.58	1388.75	927.27	1504.7	1143.57	1364.74
Peak_00393	0.730278	139.039	1010.05	925.543	769.181	1107.19	908.338	696.898	957.504	798.84	1023.22	991.775	958.075	1080.21	841.55	678.298	841.607	200	200	531.426	787.31	200	779.618	200	659.724	585.18	871.159	974.402	888.219	1178.63	646.48	1293.69	1178.86	736.205	832.541	582.606	889.572	734.593	676.037	594.665	755.445	661.583	1217.2	1020.45	1013.1	1074.85	841.187	1171.91	816.522
Peak_00394	2.77572	139.04	200	983.029	860.283	1014.08	200	200	200	200	2342.85	2842.05	3242.52	3880.62	1671.37	2045.67	2633.6	1783.3	200	200	907.871	200	200	200	359.05	200	3373.66	4404.02	4421.39	4562.08	1786.05	1776.06	3896.88	2518.92	200	1859.71	2149.11	1780.1	200	1383	200	1114.72	3394.29	5777.53	4015.09	5388.86	2226.76	2840.68	2559.03
Peak_00396	0.713649	139.058	767.436	716.724	580.57	589.411	778.272	514.954	624.446	662.337	966.623	686.593	977.198	922.931	555.893	425.786	773.983	200	696.615	840.319	843.759	788.389	654.383	200	907.256	597.213	1104.52	1258.35	1126.81	1003.11	1049.18	1094.94	1234.11	1493.62	949.045	1193.21	1046.53	1115.46	765.671	994.964	902.422	872.451	939.528	763.446	706.599	1040.68	943.167	1047.11	756.146
Peak_00401	0.763696	141.019	894.842	2087.53	1166.26	710.507	2435.82	1934.56	2051.85	1345.47	2855.39	2076.47	2719.91	3365.51	1931.88	2939.83	788.483	200	200	2048.08	1965.09	1540.74	2175.37	200	1605.7	1766.81	3160.57	2955.67	2853.72	3036.56	3075.11	1881.11	3489.26	4197.91	1389.67	2169.32	3886.3	1869.83	2915.39	2606.9	2238.34	3820.9	3351.86	3616.96	4817.85	4729.19	3079.27	4330.51	4088.57
Peak_00402	1.4215	141.055	2244.12	1769.16	1374.49	1480.68	1377.15	2146.77	1829.7	1631.33	1065.75	1063.04	1405.84	1226.1	1272.28	913.564	988.466	200	1366.2	1323.22	1905.42	200	2320.34	200	1741.45	1326.61	1281.05	966.841	934.293	200	998.583	1235.27	1103.84	1113.08	1629.13	1816.88	200	200	1949.86	1894.07	1740.85	2164.44	200	200	1042.48	200	1469.21	920.516	200
Peak_00403	11.0703	141.96	3034.29	3251.89	2171.8	3695.76	5080.92	2528.6	2268.52	2915.85	3177.19	3895.12	2147.37	2433.53	2250.77	3238.59	2841.17	2233.98	1985.47	2600.33	2261.43	1835.93	2110.82	3039.82	2971.77	3180.49	3169.53	2791.05	2824.76	2335.43	3390.25	3188.16	3499.93	2629.74	2956.83	2410.94	3198.92	2848.49	2706.99	2906.07	2641.62	2923.46	2838.23	2741.96	2612.34	3190.57	3033.66	2402.88	200
Peak_00413	3.73886	143.086	1971.61	2097.01	1834.15	1998.88	2699.38	2318.91	2222.14	2155.16	200	200	1527.76	1924.17	2265.94	1660.2	1627.5	1551.19	2145.1	1763.43	1676.85	2199.13	2761.98	2195.42	2166.91	1999.85	1442.26	1942.67	1634.96	1870.66	1624.61	1470.08	1828.66	200	1718.7	2174.74	2150.97	2060.03	2251.14	2146.32	1523.1	2272.64	1148.99	1366.18	1786.54	1559.7	1619.41	1421.06	1525.86
Peak_00415	11.054	143.96	1735.88	1684.91	1353.52	1596.94	2027.16	1536.28	1527.75	1920.16	2209.5	1545.48	1712.57	1434.47	1451.58	1791.27	1888.25	1143.36	200	1456.46	1430.41	200	1734.9	1687.06	1934.38	1322.13	1907.04	1842.91	1775.38	1448.05	1041.91	2429.23	2250.42	1679.36	1615.79	1424.17	1961.06	2157.35	1719.72	1725.4	1367.97	1596.06	1754.23	1446.35	1896.08	1967.46	2054.27	1512.56	200
Peak_00417	0.558667	143.998	1693.18	1275.18	1904.09	1009.82	200	1795.05	200	1543.78	978.418	1361.01	1353.31	633.508	200	1074.99	200	200	200	1940.62	2550.02	200	200	200	1146.07	200	1115.76	1275.59	1672.19	1210.44	200	835.9	959.314	955.229	1305.03	1986.87	1675.25	972.442	1847.05	993.128	951.368	913.336	1497.58	1316.68	2203.73	897.326	1668.52	1444.84	1611.5
Peak_00425	8.8766	144.983	200	1214.71	1472.78	1174.77	3546.35	1722.46	1361.27	2281.6	844.19	1107.32	944.94	1953.81	1252.13	1291.07	1424.23	1382.69	200	1134.95	1031.89	1339.45	1242.15	2626.13	1041.01	2377.96	660.661	200	868.447	1813.81	1502.91	1018.97	1011.2	919.124	200	641.676	1160.5	1629.99	933.85	1589.51	1596.87	1688.34	200	1538.31	2342.11	968.642	1951.42	678.478	2084.33
Peak_00433	0.640272	145.05	5734.46	4740.44	4366.51	4369.96	2521.68	5028.76	4159.25	4986.4	5076.34	5025.25	5692.99	5500.34	4934.99	4229.98	4162.7	1508.86	2493.69	2811.11	4100.66	2000.01	3912.24	1428.89	4865	2968.97	5811.37	6402.85	7230.36	6262.93	3893.85	5631.33	5212.11	5521.28	4456.61	4034.89	4976.57	4528.27	4476.02	3945.49	3999.05	4264.66	6087.25	5224.29	5559.72	6331.55	5047.42	3669.94	3963.81
Peak_00434	4.2065	145.051	3931.8	4545.84	2993.74	4218.27	3381.29	3291.3	3827.89	3624.74	2906.57	3009.56	2992.65	3600.88	3492.11	2948	2909.05	1825.53	1551.07	1769.73	2865.59	2072.27	4024.82	1512.33	4024.38	3335.2	3401.72	3158.02	3405.31	3134.83	2236.17	3392.44	3392.5	3177.23	3941.07	3625.46	4588.85	3636.8	3428.61	4130.33	3364.32	3533.42	2640.84	2767.92	3440.23	3671.75	3377.6	2696.05	2490.39
Peak_00435	2.52785	145.05	1495.67	200	1004.53	1062.08	839.912	1215	988.653	1331.54	200	1248.55	1515.83	1592.46	1524.56	1145.37	1306.29	1343.95	895.395	678.778	200	835.91	1580.88	402.013	200	200	1646.19	1641.76	1505.46	1643.92	1255.26	1287.09	200	1352.14	1488.56	1328.88	1377.46	1609.94	200	1529.61	1626.53	1416.71	200	1912.18	2098.7	1884.6	1868.22	1525.15	1519.82
Peak_00447	0.54542	146.031	1973.03	2107.65	1452.97	1756.57	200	1665.82	1551.3	1365.56	1847.77	1726.55	1453.3	1843.34	2153.59	1793.71	1618.08	1088.19	1117.52	1808.77	1541.57	975.551	1584.07	817.956	1618.9	200	2051.3	1960.43	2078.14	2293.1	1442.57	1916.57	1820.8	1828.8	1655.13	1815.98	1773.48	958.905	1847.84	1644.62	1466.64	1592.47	1733.94	1800.5	1515.96	2134.2	2172.26	1804.9	1645.06
Peak_00458	0.830715	147.029	1469.68	1712.19	1065.8	1094.11	1311.76	1471.47	1468.75	1582.48	828.285	872.393	804.115	960.028	1017.67	1149.36	1054.03	200	200	1022.3	991.705	1018.08	1417.19	200	1551.33	1482.88	800.983	1286.04	918.308	200	1224.84	1254.93	1268.13	1262.26	931.534	872.463	1040.74	1438.44	1099.17	1117.95	1060.68	1408.01	1379.75	1041.69	1795.34	1443.17	1788.96	1370.52	962.106
Peak_00459	2.75936	147.045	21104	20284.6	16248.4	18346.4	23357.2	22296	17685	17942.3	6878.15	4267.05	9004.01	4928.53	4157.7	2553.23	5075.25	3424.97	8797.67	15346.9	27315.9	10669.4	20254.5	8699.16	20168.2	13039	6010.98	200	6087.88	200	200	5787.34	7832.69	200	19293.8	20908.4	17462.4	23603.3	15583.9	17842.9	24509.8	18857.1	6748.65	4590.24	6589.25	1562.11	200	1751.29	2705.03
Peak_00460	2.99224	147.045	9637.87	11042.7	13142.3	11750.1	10092.3	8447.79	12911.7	13483.1	7935.72	7976.01	8816.47	20758.7	14190.8	11562.8	14057.6	8679.02	5311.51	7565.46	16085.3	6676.45	10204	2727.48	13927.6	5704.42	21293.9	17065.7	20518.2	29074	14975	17678.1	34428.6	35377.2	11321.3	12246	25827.3	19030.2	7979.99	9289.82	20953.3	18181	8352.46	10492.1	13064.4	23104.3	11927.7	11068.8	16111.2
Peak_00461	3.14422	147.045	222.05	3690.39	4188.11	3897.85	519.274	467.848	3593.33	5561.88	4933.55	6304.62	6913.27	16742.7	7712.38	10124	9619.87	6379.99	329.14	3714.65	6221.18	2560.53	1217.46	46.5834	4880.73	788.104	17357.8	13797.6	16385.8	24166.5	13847	15809.6	21946.7	30320.2	3697.19	4300.38	11911.5	6184.52	737.626	1630.46	8260.63	7532.57	8500.49	9194.84	10220.7	18573.6	12388.6	11118.9	11657.9
Peak_00462	3.56329	147.045	18732.2	18069.7	13542.2	16587.1	16878.8	15815.2	16828.8	17172.6	5869.06	7340.88	8617.94	10161.9	10972.7	8234.96	8274.52	5541.07	7591.05	14162.7	12294.4	9671.98	18312.8	7038.56	17418.7	14426.2	11229.7	9718.52	9151.31	11950.2	7202.8	11162.6	14350	13971.1	19225.5	20963.6	21398.1	22132.9	17888.9	18587.1	21670.5	19144	7831.07	8755.78	11650.4	11854.1	10108.2	6367.66	7906.74
Peak_00463	0.631247	147.071	3417.44	3091.14	3063.72	2770.99	1675.09	2505.17	3471.56	3040.95	3383.51	4010.4	3588.3	4166.5	3474.72	2582.42	2840.95	1114.48	2116.69	1722.83	3016.31	2020.66	2661.48	1276.68	2302.35	1535.34	3305.33	3371.18	3329.58	4105.8	2780.67	3443.73	2827.69	3005.56	2231.29	8307.46	3111.6	3172.46	2894.09	3691.17	2312.3	3442.35	3510.98	3237.17	3700.26	3611.07	3008.95	2922.08	2425.24
Peak_00464	3.17775	147.065	200	200	23.261	11.4913	200	200	15.5295	200	284.312	200	142.744	538.445	200	527.131	327.482	506.483	200	200	62.3927	200	200	200	47.3265	200	589.398	521.624	530.18	628.188	487.786	635.401	611.677	923.719	200	73.4517	34.9195	37.6649	200	200	74.507	203.359	386.686	335.951	163.007	707.521	384.619	428.933	365.38
Peak_00465	3.0426	147.069	200	300.349	223.956	149.515	3.20559	200	132.207	200	200	200	200	329.936	398.35	118.61	425.303	200	200	200	353.572	200	265.828	200	185.827	200	363.897	281.631	264.539	395.602	321.856	253.856	587.994	604.997	160.64	258.923	309.196	303.129	169.105	200	358.694	302.131	100.531	128.979	291.994	437.174	162.18	255.007	244.037
Peak_00468	2.99224	148.048	4.25647	895.506	1522.41	200	200	200	1236.36	200	200	200	200	2697.83	200	1578.55	1126.18	200	200	200	1323.77	200	448.703	200	1211.95	631.596	1540.11	1797.76	1521.8	2201.06	1842.16	1427.81	2608.82	2831.15	1139.6	200	2555.45	1363.26	6.31745	1099.05	1725.92	1800.08	200	200	200	1514.24	200	200	1682.28
Peak_00469	3.14422	148.048	200	51.8921	210.744	200	200	200	337.592	200	1445.76	200	200	402.577	200	685.232	1669.92	200	200	200	400.568	200	200	200	356.737	200	1211.55	1278.58	775.911	1602.14	200	1201.9	1420.49	2414.17	359.715	200	595.239	516.404	200	134.483	414.306	152.519	200	200	200	1407.18	1031.36	987.875	947.115
Peak_00470	3.58004	148.048	1139.94	1094.52	1540.6	1348.06	2753.6	1176.12	1317.48	1202.3	200	448.987	845.651	569.524	200	200	515.9	200	2142.07	200	200	200	1550.21	1929.14	1213.1	1690.88	1003.93	823.755	635.746	756.297	1012.46	813.566	1110.62	1110.02	1602.01	1614.46	1790.66	1669.69	1641.46	1641.54	1431.27	2257.61	668.117	745.672	1485.64	928.404	495.475	200	1070.55
Peak_00471	0.640272	148.062	13778.8	9088.21	6603.11	7821.84	5908.55	14726	8366.28	11590.7	6285.97	5824.84	6249.07	5605.86	7304.16	6487.81	4887.9	2184.76	10795.6	6415.88	7512.38	6733.35	13581.9	6644.82	10868.8	10958.6	8243.36	9819.51	9484.01	10282.5	8400.1	7990.93	7801.99	11344.9	12818.4	17351.6	8976.82	12215.1	13092.8	16478.8	10694.9	16746.5	5503.43	9137.78	6738.47	6951.1	7411.19	7263.74	6934.86
Peak_00473	0.746939	148.096	216.573	217.492	200	141.73	200	153.707	107.282	167.343	200	200	41.6378	200	200	200	200	200	141.299	218.236	200	200	139.052	200	200	200	161.42	44.6298	200	153.198	42.8491	172.548	134.288	149.577	178.01	244.788	137.555	245.952	196.798	264.127	231.027	200.064	88.4434	81.8439	200	181.075	200	200	200
Peak_00477	0.713649	149.058	770.043	472.423	495.209	358.322	200	557.383	581.414	799.214	752.603	333.754	890.917	899.098	573.503	369.831	200	200	540.367	399.586	531.574	451.306	417.035	200	592.248	746.88	826.127	1080.07	1181.86	530.357	953.297	670.001	867.481	911.259	676.307	902.068	815.501	829.287	651.088	1084.69	770.602	679.627	992.718	997.301	1297.56	777.817	1016.49	200	1258.7
Peak_00478	2.90844	149.06	4091.01	2934.39	2724.8	2722.29	2930.95	4174.96	3315.86	3994.91	1608.45	200	1489.43	1967.87	2445.39	1844.75	2198.63	1625.15	2127.91	2375.34	2536.37	2685.08	3653.12	2575.75	3213.1	3368.71	1978.28	1694.63	2124.42	1992.99	1682.96	1988.64	2215.1	2337.16	3181.59	2706.31	2514.87	3356.1	2974.46	3045.68	3038.9	3565.75	200	1319.38	2222.21	2016.54	2175.05	1483.57	1832.33
Peak_00480	4.00529	149.06	12988.2	11184.8	11638	11706.9	9581.52	12604.2	9376.57	13638.6	3483.23	3003.92	4646.14	5382.97	4143.26	4003.98	4295.98	3049.95	4740.32	8095.85	11256.6	7246.72	10292.6	4759.06	12225.6	10121.3	5796.87	5207.76	6563.01	7692.91	5402.34	5951.24	6896.08	8263.36	12059.5	11857.1	12836.8	12349	10528.2	11926.9	12472.2	12697.7	2829.73	2636.82	3420.48	4986.47	3363.35	2913.11	3942.13
Peak_00487	0.746939	150.059	1074.36	1053.62	829.624	805.056	1426.42	1010	925.005	823.54	1017.01	977.704	803.687	817.402	914.473	1000.13	530.8	200	941.195	908.766	821.225	586.041	1032.31	642.438	939.322	983.74	459.075	421.838	613.347	629.927	930.217	698.023	994.328	1129.97	879.943	820.964	678.162	1153.63	1128.04	1130.13	924.684	1349.38	533.74	400.334	530.929	217.431	579.621	591.669	733.964
Peak_00491	0.518628	151.037	27911.9	27176.4	24053.5	22582.2	12066.2	26483.4	23479.8	24341.7	29321.6	27085.7	26351.6	33234.7	32529.7	24829.3	23739.9	15975.2	17548.1	19649.5	23237.2	13206	24761.8	12341.6	26034.1	19616.5	26809.2	33280.8	34275.2	32767.7	25031.9	26069	28179.5	32766.2	21402.4	25273	24989.6	24396.7	28178.8	22047.2	22266.7	29437.5	28976.1	26394.5	35476.6	30105.5	35440.2	33232.2	28277.4
Peak_00492	3.97175	151.04	6104.21	6143.41	4614.1	6556.74	6526.22	4800.01	3689.82	5726.19	2244.77	2994.4	2511.06	3521.34	1608.41	2492.44	1772.35	1984.32	4024.68	2911.7	4647.14	3000.72	4719.79	3721.34	4878.9	4600.27	3761.25	3467.33	3840.42	3278.57	1953.54	3416.64	2728.14	4055.35	5953.9	6021.56	5719.1	7151.7	5570.21	5730.77	5696.5	6082.95	2487.29	2420.07	3306.15	3698.36	1624.98	1734.5	2550.49
Peak_00493	0.621449	151.053	600.267	618.786	493.528	674.506	284.449	443.943	416.697	447.932	289.983	501.904	322.556	555.462	709.003	376.231	562.176	238.237	313.567	446.548	574.144	265.382	414.305	45.6522	712.123	324.926	317.872	617.336	478.1	613.474	318.888	388.807	308.835	582.256	555.114	449.571	575.412	699.047	654.85	647.738	666.716	524.149	327.712	247.418	506.025	296.816	646.512	430.501	414.627
Peak_00496	0.532388	152.037	4003.89	4043.75	4161.94	3728.36	4121.54	3881.12	3269.45	4015.3	5146.03	4273.7	4975.24	5589.65	5094.15	3966.44	3889.55	2894.24	4042.71	3950.81	3903.16	4110.46	4261.31	2461.02	3739.91	4482.65	4487.76	5300.94	5466.75	5196.17	5121.28	4729.78	4824.57	5490.79	3224.65	4132.51	3844.14	3947.57	5096.23	3513.7	3599.39	5014.18	4639.91	4093.04	6457.71	5192.37	5151.95	6266.76	5234.28
Peak_00500	0.532388	153.034	2910.23	3368	2868.98	3220.63	3427.5	2787.84	2493.25	3038.71	3839.22	2442.13	3305.3	4442.1	3339.39	2950.95	3146.96	3362.04	3296.33	2443.08	2552.6	2979.49	3238.91	1841.55	2896.07	1872.25	3836.93	3891.31	3765.37	3649.76	4017.69	3347.36	3716.55	4289.96	2691.22	3203.25	3375.99	3441.95	3760.23	2786.59	3162.31	3821.08	3868.81	3405.91	5646.3	4189.91	4423.89	4566.91	4080.66
Peak_00503	3.75465	153.07	1639.78	2001.53	1648.55	1719.76	1485.37	1528.06	1451.06	1913.63	1078.64	1680.48	1335.94	1668.41	1174.8	1168.55	1190.07	1610.62	1304.16	1154.36	1191.42	200	1447.83	1295.66	1532.55	1763.08	1359.85	1303.03	1320.52	1448.52	905.135	1232.55	1206.76	200	1416.49	1453.66	1556.24	1631.07	1489.52	1944.88	1197.99	1584.64	1253.42	1108.85	1358.62	200	1102.73	999.897	200
Peak_00510	1.7512	155.034	1472.97	1324.11	1129.77	1424.24	1989.54	1349	1296.65	1357.04	1092.16	843.477	1024.86	909	1181.25	200	200	200	862.934	1021.53	1516.46	966.422	1549.2	200	1271.41	1203.31	1241.51	896.856	1057.41	1150	200	200	1000.69	1216.03	771.993	1029.97	1447.83	1547.68	1266.67	1244.55	1344.72	1492.13	546.66	200	1311.08	1136.9	789.934	1226.98	725.984
Peak_00511	2.31148	155.035	5640.11	5488.67	4472.24	5564.84	7617.09	6449.01	5490.5	6892.23	3475.22	3419.09	4775.82	4363	4410.62	3178.33	3984.21	2177.54	3672.89	3830.47	3780.92	2359.67	5719.65	2194.76	5818.29	4313.34	4298.97	4276.95	3906.66	4282.95	3481.8	4724.31	4912.6	5615.68	4579.31	4452.83	5011.29	5388.57	4697.48	4857.44	5241.63	6143.96	3309.21	4017.07	5632.34	4756.25	4272.96	3677.82	3151.37
Peak_00513	0.54542	156.015	3246.06	3274.95	2666.4	3252.48	1971.35	2939.38	2848.57	3001.71	3294.62	2967.09	3436.75	3771.12	3175.09	2673.68	2847.51	2333.4	2216.68	2954.93	2569.95	2025.06	3082.66	1015.52	3086.73	2552.94	3727.36	3558.57	4288.28	3668.15	2402.88	3744.89	3691.1	4179.68	2603.13	2978.57	3392.91	3499.4	3191.39	3161.11	3058.94	3356.88	3826.68	3267.24	4964.49	4402.8	4021.29	3542.91	2711.63
Peak_00514	0.66493	156.043	2149.83	3672.08	200	1610.14	200	1635.08	1825.41	2151.35	325.996	200	200	409.885	200	200	200	200	4026.11	5708.53	4460.62	4765.2	2510.17	3440.93	3507.73	3146.33	106.448	487.832	641.444	508.139	492.075	433.757	104.478	200	2628.71	3553.76	2752.81	2787.45	1887.51	3157.08	2384.73	2106.15	200	140.478	381.758	338.329	549.118	269.283	700.466
Peak_00520	0.763696	157.014	1062.28	1154.58	560.603	921.868	1521.73	929.905	1162.04	924.242	801.179	992.79	679.738	1092.74	877.438	1273.42	1327.78	200	1179.47	1446.47	797.274	809.284	1185.43	842.585	1090.94	959.41	863.212	1060.5	1156.5	669.571	1480.81	1102.13	901.063	1134.05	766.83	888.942	750.119	1068.48	1254.89	990.474	1280.46	1125.06	1157.09	940.012	1525.47	1015.54	1720.6	1656.05	1317.46
Peak_00521	0.713649	157.05	3003.67	3131.7	2651.28	2472.75	2160.98	2256.76	2911.71	2462.42	2870.97	2944.46	2945.08	3242.98	2998.07	2760.54	2766.86	839.489	1512.13	1521.95	2298.32	974.671	2050.24	200	2197.59	1468.21	2741.6	3174.22	3175	3734.55	1951.28	3015.55	2857.72	2588.55	2054.93	2027	2941.18	2539.57	2530.42	2185.74	2270.24	2169.23	3400.47	2485.27	2972.76	3409.18	2650.42	2401.33	1834.55
Peak_00534	4.84461	158.154	1389.45	1494.34	703.795	1596.64	1860.57	1179.02	1613.87	1532.01	1567.85	1477.51	1371.7	1471.81	1286.5	1223.58	1308.59	1210.82	1176.03	701.32	956.65	945.953	1224.82	200	1571.14	1526.08	1369.39	1193.51	1339.81	1274.88	1195.08	1563.12	1632.83	1209.2	1497.21	1312.78	1514.21	1419.4	1366.46	1617.42	1064.14	1524.73	1025.7	1163.37	1030.3	1468.02	943.836	1309.81	1201.47
Peak_00547	11.021	158.966	10689	11368.6	9267.49	10835.2	8987.64	10097.4	9994.89	12597.3	9066.87	10352.5	9733.25	9160.54	9362.55	10114.8	9199.99	4884.31	7285.86	6483.93	9226.69	7398.81	11770.4	9191.59	9956.61	8760.34	11720.4	10246.6	11370.5	11710.1	8091.75	11001.7	11966.7	9945.26	9403.37	9455.2	12735.8	12435.7	11219.5	10410	8935.97	8658.02	9660.44	10410.7	12017.2	11050.7	11230.7	9553.38	4276.45
Peak_00554	1.40511	159.066	6311.79	4368.41	4268.77	3685.31	4834.43	6372.21	4608.27	5052.43	2955.44	2851.08	3043.77	2721.05	3897.16	2983.45	2911.34	1232.64	3370.65	4974.83	4552.24	3349.81	6228.44	2065.03	4855.97	4173.76	2686.49	2610.11	2686.68	2524.69	2656.39	2547.36	2582.26	2746.28	4596.3	4421.98	3732.84	4088.94	5711.44	4164.22	4484.72	5901.15	2048.57	2344.8	3067.8	2514.98	3151.11	2787.04	3089.43
Peak_00555	3.65573	159.066	4184.31	2556.65	1479.18	4916.43	2163.39	2418.07	200	2447.59	1406.19	3375.51	1747.17	5496.7	2853.32	2308.44	2115.63	1779.12	1538.25	1412.4	1757.19	1636.53	1792.78	2336.43	2406.55	200	2225.89	1635.2	1326.52	1708.76	1258.27	2114.92	1873.67	1635.59	2512.85	2091.53	2579.42	2164.38	7273.85	3225.13	1800.07	2355.18	1942.11	2118.5	3276.32	2403.07	2251.43	2406.94	1168.2
Peak_00567	3.31204	161.044	1062.47	1000.79	902.814	772.633	894.503	1251.36	1011.94	1201.07	477.331	661.222	774.4	743.924	200	643.936	720.745	200	200	978.245	1047.73	1095.1	993.066	200	1205.78	871.59	627.435	436.879	591.876	729.414	551.097	514.705	661.04	830.326	1064.94	1062.43	958.95	939.949	985.804	807.402	973.423	1218.32	402.47	639.462	668.45	634.199	695.325	672.357	737.099
Peak_00569	3.32882	161.061	2477.97	2835.81	2560.08	2780.14	2584.93	2995.34	2789.19	2857.73	2898.17	3504.69	3908.62	4789.71	4342.77	3766.16	3866.25	2741.97	1458.64	3402.64	3536.32	1757.69	3088.95	2137.48	3124.23	2394.83	4943.54	4382.18	4560.58	6300.96	4205.83	4535.75	5473.87	6528	3179.3	3927.27	3694.4	3789.67	2900	3024.27	3368.54	3524.57	3108.16	3205.77	3609.69	4414.94	3374.19	3003.38	3610.24
Peak_00576	2.80808	163.005	171.952	123.685	200	141.497	200	174.891	200	200	200	200	112.492	124.225	200	33.0553	197.77	200	200	200	86.2181	200	200	170.299	180.509	200	234.706	200	11.0375	141.85	181.773	126.66	200.504	210.417	200	215.111	98.9115	198.074	200	170.975	124.881	127.858	174.781	84.3646	144.824	148.88	200	200	145.897
Peak_00577	1.68445	163.04	1191.72	200	1038.69	1151.18	1368.33	1047.88	907.075	1234.61	1119.95	869.33	1320.74	2035.02	1957.73	1617.79	1921.18	1297.05	200	859.18	916.425	775.596	1169.32	901.653	790.227	800.531	1943.6	1668.53	1915.91	1910.37	1861.95	1817.32	2080.16	2039.32	1509.89	643.665	1132.52	1128.89	581.637	894.619	200	1395.49	1338.92	1432.63	1705.88	1384.46	1861.48	2197.35	1658.66
Peak_00578	2.51112	163.04	77271	75009.9	66912.1	66385.7	76241.8	74824.9	70924.9	75378.7	48083.8	50138.9	63974.2	50475.9	48492.8	45312	38172.6	22637.7	27217.9	71541.2	75071.5	41154.3	70271.8	20841.2	76132.9	49708.5	69924.7	67051	77514.6	58224.3	44602.9	59589.2	59326	67245.3	69355.5	81142.3	85083.5	93395.2	56737.4	68924.7	78198.1	74828	43821.2	57199.2	62913.1	58055.9	42065.1	38976.6	32978.4
Peak_00579	2.75936	163.041	78765.2	86659.3	74847.9	88915	71896.6	87459.2	85527.7	100592	65867.6	68752.1	72998.8	103816	91845.6	83024.7	78028.6	56031.1	28295.3	64530.3	91543.2	51631.8	64610.4	35363.3	87032.4	60581.3	111720	98196.3	102700	126292	84986.9	106462	127078	151701	83348.2	84528.6	110070	98877.1	58523.6	80821.6	100026	103055	89439.2	96235.4	98115.5	114767	96518.9	84783.8	92707.5
Peak_00583	0.640272	163.061	7144.62	5826.91	6586.64	5515.58	4061.23	6668.41	5907.69	6064.71	7436.39	7323.85	7435.78	8045.39	6906.13	6158.82	5425.55	2527.82	4368.22	4070.34	5888.93	3500.31	5149.75	2349.34	5659.42	3962.94	7405.7	7875.37	8464.71	8425.69	6374.07	6640.34	6673.3	7475.45	6504.17	6141.13	6945.77	6372.8	6362.23	4699.29	5221.56	5846.75	7589.66	6236.13	7233.01	6876.37	6131.24	6132.64	6092.83
Peak_00585	3.32882	163.076	8307.8	7449.89	8204.78	8130.6	8025.69	7767.29	7912.65	8552.56	8974.53	9882.01	12406	14635.6	11720.5	10410.9	11115.9	8650.02	4604.58	10035	11254.8	6877.47	9036.51	4332.68	8706.83	6063.92	14039.2	12392.4	13129.3	16944.4	14808.3	11732.6	14857.2	19145.9	9536.53	11571.8	10370.7	10425.2	7708.96	7958.27	9295.37	10555.4	8760.4	9123.59	12223.5	12676	10393	8985.79	12467.3
Peak_00586	2.66033	163.061	2404.39	2402.25	1984.17	1725.49	2688.37	2161.78	2659.45	2194.02	1588.22	2431.56	2613.14	2548.72	3525.6	2380.89	2622.15	1770.66	1109.8	2769.93	1943.92	1253.89	2997.33	457.101	2654.83	1366.31	2798.03	2555.86	2932.08	2253.03	2218.33	2160.7	2677.21	2310.99	2596.23	2841.64	3040.11	3001.48	2832.48	2539.22	3047.92	3070.84	2024.25	2322.32	3833.14	2810.31	2824.3	2791.31	2880.91
Peak_00587	2.94198	163.073	427.289	380.138	309.761	263.476	466.501	325.099	253.97	454.569	283.997	216.462	489.133	622.452	296.451	427.952	479.281	219.682	143.887	319.174	389.81	266.794	459.648	318.602	378.85	341.656	681.866	368.079	581.178	847.095	679.258	511.592	532.618	866.102	376.012	356.31	718.116	450.509	122.452	527.981	399.738	527.406	252.352	215.084	565.236	414.287	531.649	416.522	623.25
Peak_00588	0.797242	163.079	458.059	210.424	272.215	318.35	243.621	312.21	274.152	242.992	295.919	247.198	345.556	365.485	227.012	264.815	204.865	57.8689	70.074	338.195	235.31	181.858	303.832	87.7071	217.17	146.537	563.143	406.154	298.499	418.946	298.884	340.695	414.676	331.62	311.801	275.292	297.828	398.002	328.014	244.567	379.52	311.278	465.538	262.017	310.851	360.276	319.596	160.977	219.091
Peak_00589	2.52785	163.088	507.855	450.352	429.044	342.039	429.657	449.655	388.062	460.958	492.432	331.823	359.968	288.075	419.919	279.424	296.178	365.525	312.089	556.722	564.766	243.617	434.472	241.451	394.977	443.649	637.626	374.459	423.122	256.595	317.229	335.375	574.437	501.867	489.403	540.4	572.197	675.255	527.345	449.512	591.579	502.17	306.308	389.305	499.203	415.927	329.849	364.06	242.223
Peak_00590	2.77572	163.094	616.638	508.869	486.221	647.898	602.512	546.22	623.823	667.674	645.402	548.931	639.358	743.795	921.24	651.241	636.978	480.355	560.233	475.269	537.051	318.283	616.032	569.275	530.741	388.621	853.844	471.163	456.919	818.844	817.263	809.409	788.694	797.117	470.468	669.195	714.388	690.488	480.628	547.739	754.594	759.207	636.052	504.393	964.355	751.191	675.495	745.577	731.698
Peak_00591	3.37908	163.093	266.083	248.669	185.841	350.532	215.946	171.158	224.736	289.568	302.146	251.72	335.555	419.632	256.961	320.556	320.937	182.981	203.5	263.975	369.427	257.42	323.468	237.028	385.2	206.319	594.624	454.128	302.685	536.861	425.938	570.752	664.715	840.323	307.172	334.73	208.477	408.007	248.944	334.274	325.922	376.251	388.222	270.258	261.866	550.107	294.875	235.445	264.444
Peak_00593	3.62274	163.134	819.9	985.791	200	1463.2	1683.9	948.541	892.496	1243.48	945.759	904.547	859.019	912.958	926.19	915.894	1155.67	200	200	200	386.897	200	834.666	200	839.915	200	1096.55	200	200	726.043	200	1137.26	972.926	654.828	1152.59	1012.25	989.897	862.515	1596.75	1071.84	867.648	1116.98	972.492	771.878	1441.55	1025.01	940.155	802.93	200
Peak_00595	2.51112	164.043	6100.23	5907.82	7011.49	5464.85	10592.7	6607.29	6025.94	6713.81	5338.35	4674.29	5864.38	5331.35	4889.33	4255.17	4423.75	3644.95	7532.09	8927.05	8186.16	5721.92	6683.04	5492.55	6121.23	4148.29	5982.68	6616.27	6512.78	4852.84	6938.06	5752.49	4996.27	5801.77	6083.52	8321.62	7578.22	8269.21	5614.45	6551.08	6920.08	8648.52	4142.28	4513.95	6592.19	4417.89	3408.03	4312.75	4184.19
Peak_00596	2.75936	164.043	5676.27	6368.41	7155.6	7275.13	10891.1	7129.42	8746.65	9219.27	6874.94	5494.14	7478.61	9833.26	8472.43	8224.56	8398.63	8562.44	4606.95	8556.14	8567.27	8245.9	6223.08	5686.04	7127.09	4529.95	9764.87	8766.16	8421.94	9752.82	13841.6	9189.03	11066	12848.8	6664.55	8751.82	10327.4	9000.82	5497.85	6409.78	8880.19	11872.5	7697.06	7326.3	10794.4	8833.73	9245.72	9489.58	12386.7
Peak_00597	0.66493	164.07	745.16	691.51	398.798	567.459	329.82	494.42	445.054	503.741	397.036	538.646	496.495	481.321	443.393	408.178	343.148	200	513.529	618.034	610.973	530.668	467.93	200	526.614	414.845	403.731	589.948	556.775	566.221	407.646	496.419	625.266	540.356	1236.93	1170.32	1438.28	1044.95	1204.61	932.441	952.246	1035.83	587.608	554.529	677.283	721.416	815.104	509.632	556.508
Peak_00598	2.52785	164.06	476.919	478.284	351.618	515.455	430.157	382.87	442.926	365.665	292.375	254.643	339.54	365.432	254.086	254.589	205.451	200	254.639	466.728	406.2	171.821	429.262	151.047	548.826	279.828	675.555	451.451	459.293	348.438	309.523	433.912	349.903	433.541	379.74	466.176	400.911	804.708	316.373	531.937	509.188	641.327	371.451	405.429	377.836	425.68	323.794	326.482	325.84
Peak_00599	3.34556	164.079	561.391	753.136	589.74	522.073	648.163	755.201	200	855.388	964.105	559.462	1200.03	1501.44	991.581	795.83	1179.35	200	200	762.916	1045.28	200	870.451	835.898	890.511	596.793	1708.91	1201.99	1208.65	1561.41	1380.4	1448.84	1693.29	1741.61	825.977	1283.03	1043.83	1186.93	837.342	888.696	971.737	894.913	913.194	1074.5	1298.75	1538.37	660.711	1159.06	870.048
Peak_00601	2.79196	165.054	3364.28	5600.59	5558.02	5533.06	3484.09	3779.17	5946.54	4336.72	3681.44	3810.08	4765.27	6612.31	4485.2	3481.75	4032.6	2797.04	2624.07	4497.43	7764.79	3389.65	3267.22	2662.08	4964.49	2390.17	5467.07	8235.32	8528.62	10912	3924.88	4087.75	9065.68	7311.16	3437.88	6479.54	9026.83	6212.48	3267.04	4387.69	4254.59	4505.98	4032.95	5807.58	5473.17	6137.25	4072.63	3627.12	4509.21
Peak_00602	3.47935	165.055	2657.95	2553.68	1794.08	2026.73	2244.75	1941.2	2401.19	2457.88	1006.26	200	1637.01	1404.92	1679.52	1412.44	200	1188.25	1775.72	2479.39	1999.97	2352.44	2460.58	1816.39	2255.57	2167.98	1666.19	1851.79	1746.46	1825.95	1367.39	1321.95	1881.75	1845.15	2549.33	2695.33	3225.35	2832.87	2248.13	2156.15	2414.47	2532.17	1042.11	1224.23	1561.83	1551.54	1365.22	930.534	1384.43
Peak_00611	1.61779	166.087	14706.6	9239.79	8779.66	7886.16	14166.3	13534.2	9594.04	12740.7	7932.53	6302.26	8878.92	10155.5	9016.69	7915.72	8416.69	2511.42	14882.3	17217	15326.3	11311.5	21674.6	5808.64	14950.1	11575.6	11405.5	11331.4	12476.2	11138.1	11204	9697.88	13917	13701	7528.55	9824.43	7476.72	7628	7901.59	7238.51	8269.01	10537.2	2801.41	4134.24	5293.7	3750.48	3586.78	4462.1	6176.19
Peak_00616	0.570455	167.014	1500.18	1420.94	1452.53	1137.62	200	1039.55	852.902	1296.39	1464.57	734.642	1605.14	300.511	1268.53	979.359	200	200	200	251.439	1401.62	106.636	874.81	200	636.794	200	1516.76	1723.34	1501.79	1010.15	1915.13	878.149	842.767	1048.14	1294.15	1506.63	1639.75	1238.22	1979.02	734.442	1493.87	1817.74	1801	1275.16	2591.52	1563.3	940.954	1494.77	762.334
Peak_00617	2.52785	167.035	2406.56	2136.1	1758.68	2205.94	2750.9	1870.08	1853.29	2099.79	908.677	1324.16	1560.63	1521.78	1421.2	1128.35	1162.66	824.889	200	1411.31	1404.84	1561.88	2068.61	1038.05	1737.1	1354.6	1160.92	1468.8	1337.34	1387.06	1116.08	1396.41	1229.59	1616.64	1830.54	1665.38	2046.09	2157.79	1771.23	1881.56	1877.08	2170.5	807.418	1172.95	1831.81	1604.23	825.709	1112.92	871.15
Peak_00621	3.31204	167.086	499.077	705.561	559.787	639.107	787.559	729.529	701.299	713.827	511.06	200	387.475	393.088	200	200	374.874	200	451.178	758.029	758.869	543.866	721.692	510.197	678.995	569.047	536	200	200	505.505	491.962	500.189	506.846	525.744	554.758	835.817	628.699	757.369	914.305	676.23	740.025	892.573	234.558	200	411.478	297.367	200	200	354.801
Peak_00622	1.63433	167.09	1519.13	996.98	893.616	794.511	1180.83	1405.5	857.722	1293.52	200	875.139	885.109	1010.09	925.12	996.736	200	200	1341.86	1584.88	1536.18	1443.53	2443.7	675.159	1679.23	1849.01	1408.97	1086.35	1244.98	1120.84	880.292	1084.17	1449.34	1344.84	691.916	939.236	608.421	745.367	200	968.215	995.639	1134.3	200	200	200	200	200	200	478.771
Peak_00642	0.763696	169.036	200	722.866	367.33	435.233	200	537.832	288.115	654.354	463.028	200	269.053	467.987	319.203	275.038	200	200	406.803	200	494.695	200	519.193	200	603.011	200	551.412	490.715	443.072	56.6964	513.773	477.672	239.869	392.487	458.83	278.807	52.2601	172.447	526.155	354.153	693.681	490.962	553.325	556.779	711.94	578.014	791.171	439.771	513.3
Peak_00652	1.2761	171.03	2158.41	1675.87	1819.24	1396.86	3227.1	2735.51	2473.49	1776.56	1963	1507.44	2206.61	1605.32	2991.86	1818.02	1950.91	466.777	200	993.078	1587.45	924.235	2037.89	200	1826.59	1167.39	2048.85	1844.03	2100.19	1395.48	2205.14	2509.22	2338.03	2493.8	983.413	899.295	1123.99	1061.31	1485.84	1329.02	1710.26	2007.98	1224.83	1439.27	2583.02	1677.76	2388.93	1894.15	1372.56
Peak_00654	3.73886	171.081	2210.95	2201.32	2121.26	2210.42	2440.54	2115.02	2221.6	2412.2	1537.92	2060.53	1606.1	2097.2	2161.87	2032.71	1751.96	1527.19	2047.42	2053.67	1737.87	1351.33	2123.09	2346	2194.96	2008.88	1786.43	2015.56	1720.16	1963.8	1633.67	1731.97	1619.86	1545.96	2164.12	2038.91	2045.9	1873.58	2400.7	2314.02	1913.08	2318.23	1429.48	1570.2	2171.56	1591.36	1582.04	1484.45	2209.63
Peak_00656	6.99765	171.139	2462.92	3153.37	1659.91	2653.17	2898.18	2078.16	2689.48	2089.65	2352.69	2166.04	2389.27	5549.89	2282.48	2888.62	3410.33	1672.93	2532.63	1375.65	2219.7	1653.78	2091.33	2929.77	2015.39	1510.53	3269.4	643.939	200	1309.52	2315.89	2488.6	2843.54	2420.7	2176.63	2238.64	2226.05	2592.59	2908.71	2808.62	2179.38	2914.6	2390.69	3315.31	3368.51	2846.74	2435.86	2551.74	2315.71
Peak_00672	0.746939	174.079	3006.42	2293.03	2543.42	2042.36	1335.78	2199.5	1942.37	2033.74	1189.71	915.856	1124.55	1336.63	796.252	857.457	629.205	200	2365.72	2323.87	2764.24	1442.66	1448.82	1525.09	2332.35	1996.34	1069.2	1189.74	931.021	1742.18	1237.21	1383.49	1328.09	1192.16	2685.45	2853.99	2552.99	2529.16	2082.22	1905.98	1870.09	1983.41	606.574	493.33	606.408	795.594	390.071	630.14	727.293
Peak_00673	0.631247	174.895	658.676	1032.65	760.269	758.786	553.844	1035.5	1213.11	776.487	691.384	1118.32	497.412	466.476	1224.55	763.73	567.79	504.615	632.015	729.944	954.075	1026.51	821.072	609.032	932.093	806.235	158.695	311.104	257.968	570.879	1055.03	667.134	465.731	475.481	996.035	1519.47	929.854	1301.29	1455.53	1293.84	1128.72	1266.15	423.989	366.189	200	449.711	412.613	559.971	255.271
Peak_00674	0.780457	175.007	207.365	280.072	87.4763	131.135	111.497	182.893	286.979	317.208	40.0498	20.0256	44.3015	166.403	165.892	99.4625	51.1403	11.0987	200	107.213	202.387	89.876	103.508	200	208.561	86.0976	94.4599	183.606	146.651	50.8093	11.0691	101.861	174.873	265.646	46.6421	156.42	114.517	203.293	285.798	203.221	299.127	132.514	244.393	160.424	270.638	310.927	350.286	246.918	179.493
Peak_00675	0.763696	175.026	2716.38	3117.74	2079.33	2745.39	2126.15	2576.91	3387.98	2367.39	2194.49	2411.62	2309.78	2984.94	2726.34	2976.57	2665.98	1030.85	2543.9	1811.59	2250.85	2057.99	2815.11	1512.68	3267.18	3152.93	2487.33	3080.22	3369.56	2426.6	2705.92	3052.33	2988.53	3267.19	2537.44	2139.3	2311.37	2896.98	2715.76	2828.33	2607.16	3133.38	3546.18	2881.25	4277.01	3440.89	4807.36	3777.58	2742.23
Peak_00676	0.763696	175.06	559.296	496.929	468.076	442.765	594.854	447.705	446.124	219.731	698.986	659.755	536.187	594.951	621.95	535.277	457.582	200	200	506.49	491.075	200	2.96784	200	389.717	200	615.544	680.107	528.846	693.912	821.797	524.133	546.936	408.15	200	756.056	745.478	420.835	401.081	455.941	503.333	503.499	561.317	470.979	639.797	486.27	503.229	704.954	444.557
Peak_00684	0.684884	176.015	2791.92	4292.3	2270.74	2214.69	171.862	2671.17	2498.29	2469.34	4405.07	3958.68	2370.58	2998.62	3610.41	5237.69	2842.38	1054.63	2641.61	5196.11	4719.97	3136.16	2984.09	2779.99	4998.62	3706.58	2650.43	4053.11	2964.77	4323.62	3675.43	3714.85	4981.65	4904.81	3359.67	6508.57	5311.73	3534.09	4423.34	4930.65	2795.38	3028.1	2916.25	2585.95	1923.89	2469.43	3875.72	3542.31	3953.75
Peak_00686	0.730278	177.018	350.661	225.838	168.642	122.151	462.724	378.783	393.251	242.441	29.0776	298.542	138.147	23.8112	214.033	171.141	66.927	200	465.463	372.014	271.595	216.088	267.538	200	328.48	288.253	98.9391	268.933	303.042	18.3733	170.734	200	114.627	41.0937	56.8298	282.122	167.779	119.963	289.487	351.894	212.335	276.741	178.497	115.419	358.995	159.151	318.27	178	61.7284
Peak_00687	0.897183	177.021	229.958	199.424	187.52	107.176	535.162	272.383	333.739	173.989	45.8085	161.41	112.267	50.1116	105.027	111.889	200	200	188.853	200	166.795	30.9895	265.264	200	111.247	62.5298	105.717	238.055	82.9476	31.3969	237.042	86.4613	50.7162	50.7054	74.8024	132.998	126.608	111.879	192.394	163.214	205.673	182.445	117.77	107.668	254.229	129.889	261	123.716	92.758
Peak_00688	0.763696	177.041	3952.16	8122.52	6566.34	3465.49	4636.73	7424.36	6654.24	6052.62	8521.92	8996.2	9193.69	12262.5	7751.52	11657.9	2862.6	1917.03	2639.15	4874.05	9105.61	3113.99	8005.97	3563.86	6901.11	6196.13	11812.5	10676.4	11819.1	13332.6	8190.92	6894.26	12780.1	17511.2	5431.34	7900.42	13651.2	6338.22	9877.85	10283.4	8375.14	13133.3	11283.9	14337.8	17721.6	17075.6	12379.8	15340.1	13724.4
Peak_00689	2.85808	177.056	8817.3	6805.92	6200.98	6114.89	7568.86	9718.44	8209.88	8256.01	7072.23	6254.94	6667.09	6217.73	10085.2	7442.87	7372.56	4084.65	3772.67	5631.34	7029.87	4341.46	9219.86	3516.41	8051.98	5795.54	7906.49	6593.55	6222.19	4925.13	4590.91	6840.29	6306.77	5340.47	6529.16	6524.8	5795.23	7972.31	5987.72	6822.28	7343.39	7174.04	5253.04	5466.12	7258.63	4998.92	6266.63	5997.5	6503.68
Peak_00690	3.09097	177.056	16.3137	200	200	200	104.497	139.484	557.796	200	1458.98	1207.46	200	2837.38	3866.51	2097.18	2717.89	406.648	200	200	200	200	119.066	200	191.581	200	2928.36	1769.27	2454.66	1888.98	2896.23	1923.5	2121.56	2277.57	200	200	1125.99	200	200	200	200	200	2373.77	2118.92	2904.12	2573.87	2892.55	2259.73	3718.3
Peak_00691	3.5465	177.056	4602.27	4410.1	3931.88	4291.2	4501.09	5430.48	5256.63	5195.34	2662.46	2615.31	3623.76	3593.36	3371.15	2747.56	3168.17	2310.47	2217.04	4496.67	3303.72	3041.88	4932.52	3503.66	5337.86	4201.53	3684.63	3491.85	3461.65	3514.65	2712.97	3223.9	3692.91	3944.61	4193.81	5591.94	5029.13	5627.72	4303.95	4638.25	5210.48	5799.55	2828.34	2503.89	3519.24	3263.1	3397.41	2145.76	3177.16
Peak_00692	5.03119	177.055	813.946	1046.63	200	878.69	764.048	1029.73	1116.23	692.094	200	1124.15	871.83	1056.81	1217.24	949.694	661.634	837.908	757.347	200	200	528.384	780.509	538.572	813.659	729.645	1033.61	909.984	827.684	655.225	672.721	758.729	1017.44	592.746	701.582	733.724	872.201	669.132	639.233	846.213	200	1190.56	200	901.971	845.986	200	703.779	885.062	773.72
Peak_00700	0.730278	178.043	182.865	360.637	200	164.016	513.25	327.585	323.86	450.603	527.892	660.547	643.524	768.246	315.343	388.032	200	200	200	349.523	540.092	200	493.683	200	328.906	130.836	578.996	611.378	722.296	753.258	807.318	501.529	697.696	872.846	271.162	574.095	791.331	351.741	519.917	445.744	341.654	863.183	640.602	930.832	1145.4	960.078	716.955	948.388	1120.54
Peak_00704	0.813994	179.049	380.228	937.829	579.726	463.619	834.017	784.803	516.491	564.192	704.151	527.66	632.732	932.697	754.741	505.097	443.65	200	200	603.717	515.991	200	400.916	200	433.383	200	1053.04	1121.07	698.187	861.356	1032.25	748.382	983.204	1130.55	700.508	1580.93	1749.98	1575.63	1226.71	1341.03	1408.71	2029.13	844.903	719.112	974.436	1005.41	287.677	924.764	701.69
Peak_00716	2.31148	180.087	1598.11	1631.97	1794.24	1418.33	2420.16	1704.96	1805.41	1747.47	1375.08	1599.97	1800.9	1789.3	1750.68	1350.16	1532.18	2069.97	2352.09	2071.06	1495.89	1889.02	1976.26	1377.96	1421.18	1574.47	1173.93	1599.8	1546.28	1541.16	1852.84	1379.37	1529.53	1424.92	1596.87	2021.35	1748.6	1678.51	1937.64	1942.5	1309.19	2195.29	830.645	969.231	1697.76	1400.51	1256.87	1504.07	1370.58
Peak_00719	2.74287	181.05	1057.03	1022.63	1113.93	1027.35	1366.58	1293.34	1061.34	1091.54	956.608	686.431	1015.66	926.415	1062.88	513.898	874.605	745.756	1028.82	1178.42	1100.49	752.339	1088.64	1137.94	1056.07	932.131	1022.21	886.978	817.666	937.508	592.339	963.908	929.954	611.495	1197.58	1226.26	1199.47	1049.66	1173.48	1193.36	1114.56	1194.08	860.525	200	899.722	709.645	987.227	596.589	839.132
Peak_00721	0.713649	181.071	1234.36	799.233	704.17	638.648	850.306	697.784	879.323	740.739	783.086	820.642	802.677	898.094	771.931	669.719	675.679	200	747.266	800.421	799.275	650.75	608.629	200	587.907	200	789.138	886.641	861.239	1217.32	613.093	587.239	544.87	745.342	712.88	720.531	1030.01	868.683	916.623	691.891	562.534	719.737	859.173	200	783.004	810.522	775.217	437.786	1026.29
Peak_00725	4.74381	181.123	1659.14	994.714	821.762	1389.55	2371.86	1865.72	1794.8	1691.26	1169.19	998.615	1564.77	1681.41	1679.92	1300.64	1962.01	1808.21	1279.3	200	200	1076.5	1247.93	200	955.023	200	1097.55	1603.58	1049.65	811.553	1411.15	1193.15	1003.23	1161.38	1276.78	1430.58	937.884	1328.83	1160.19	1016.4	1385.97	1425.32	1245.97	945.55	1805.2	1162.71	200	1031.06	1597.8
Peak_00730	0.847468	182.082	935.13	805.355	725.976	555.879	1121.5	200	200	650.746	727.53	200	643.03	783.453	911.305	416.465	866.491	200	913.414	200	743.209	847.723	917.045	826.72	567.348	886.586	438.933	716.687	680.955	200	740.528	525.751	554.343	200	445.512	190.151	200	607.768	200	506.766	537.939	556.602	200	200	200	200	125.594	348.859	200
Peak_00731	0.532388	182.964	8538.39	7981.5	9595.14	8452.4	6707.69	8921.54	8295.91	8855.31	12526.1	8984.58	11063	13733.4	11720.4	10136	9696.51	6617.68	11269.6	8281.62	8471.83	6228.5	9461.68	6626.97	8756.62	6866.96	11788	12677	13234.7	12843.8	13842.1	11399.9	12811	15957.1	8120.71	9447.03	9191.71	9333.97	10555.4	8879.78	10017.4	12411.7	12337.2	10418.9	17607.2	13610.6	13427	14749.1	14270.3
Peak_00739	0.631247	183.051	6712.99	7077.13	5952.45	5761.59	2148.35	7111.07	7183.71	6315.99	9454.57	8086.31	9715.05	13063.5	8422.26	7280.71	7492.07	1906.19	5047.34	5284.57	6234.78	3166.56	6206.52	2207.99	8070.84	4723.07	11966.2	16869.1	16624.4	11544	8722.64	9892.82	11747.6	13405.4	6204.21	8001.14	9130.11	8685.51	8301.32	6451.42	6529.9	8266.78	13461.2	12112	15433.2	14187.9	15286.3	12602.9	13719.6
Peak_00741	3.26168	183.081	901.106	1085.64	888.175	739.443	1007.26	1266.13	933.049	891.25	741.286	200	758.713	561.385	798.795	200	769.22	895.37	769.914	1086	1577.69	993.543	677.274	1002.23	1029.48	1056.68	670.506	670.237	681.921	590.77	787	375.218	200	733.363	808.236	1052.11	909.311	946.913	963.344	929.64	783.299	1101.47	596.899	200	774.453	557.242	541.37	200	654.043
Peak_00748	0.640272	183.552	1544.88	1546.88	1712	1153.53	1032.55	1418.99	1342.54	1820.11	2457.68	2221.75	2409.91	3211.67	2109.59	1791.53	1910.12	200	1595.57	2174.95	1845.59	1611.12	1672.39	200	1677.71	1643.27	2656.35	4081.68	4367.55	3494.8	2643.8	2461.7	3111.51	3544.32	1595.69	1977.5	2162.23	1964.87	2083.43	1492.57	1560.68	2301.71	3110.45	2589.74	4537.99	3253.1	3877.11	3445.36	3698.39
Peak_00749	0.54542	183.965	2671.07	2608.29	2299.24	2633.09	2537.98	2266.06	2426.48	2592.96	3734.59	2432.8	3150.94	3605.41	3371.97	2756.48	2781.84	2171.84	2379.61	2828.18	2332.6	2540.12	2649.95	1381.68	2992.39	3128.78	3822.49	3351.99	3893.88	3269.05	3116.86	3570.82	3692.31	4413.74	2547.51	2546.43	2737.74	2852.64	2792.66	2487.26	2952.44	3283.36	3700.67	3124.8	5042.32	4141.51	3745.38	3823.63	3608.98
Peak_00750	0.640272	184.05	880.108	1251.17	964.485	1140.07	675.675	1234.95	1041.43	1139.57	1624.84	1215.23	2291.5	2414.72	1222.93	1309.73	1319.33	200	872.24	1416.03	895.875	1055.9	1138.72	454.523	1237.88	1364.15	1906.53	2590.83	2724.05	2096.56	1312.32	2054.74	1786.17	2433.9	1180.86	1426.53	1639.78	1504	1376.78	1269.72	1144.23	1468.49	2468.4	2017.96	2730.12	2690.18	2517.87	1837.84	1789.66
Peak_00751	0.640272	184.074	2007.08	2348.45	1512.64	2165.96	2234.35	1533.7	2029.94	1427.91	678.967	870.653	815.343	594.113	950.708	650.318	371.168	200	2723.25	3656.56	4143.41	2465.51	3299.67	1942.37	2374.98	1828.06	566.27	557.222	432.615	898.49	1022.84	739.116	551.944	589.736	2159.43	2454.25	1747.97	5132.96	2675.33	1284.59	1751.79	2566.33	742.43	403.959	462.373	788.232	503.738	393.71	496.998
Peak_00754	0.54542	184.962	3194.88	2878.87	2920.38	2740.04	1617.59	2885.98	2426.59	2922.2	3492.28	3107.91	3728.46	4652.42	4209.38	3397.88	2605.01	1705.1	2344.98	2428	3111.37	2238.4	3258.53	1628.36	2935.02	1956.44	3845.81	3981.67	4773.39	4333	3374.51	3608.3	3942.14	4982.55	2605.41	2725.52	2767.65	3083.19	2955.13	3009.29	3265.17	3456.22	3897.94	3410.6	4738.17	4326.71	4787.52	4035.74	3709.68
Peak_00757	11.054	184.986	1452.47	2047.24	1581.52	1568.08	1888.24	1241.17	1988.56	1587.66	1674.72	1539.43	1613.33	1920.11	1750.76	1748.35	1589.71	1284.3	1444.94	1746.77	1397.05	1202.37	1384.01	1831.01	1358.11	1774.42	1670.46	1690.26	1805.49	1650.61	1494.19	1927.42	2038.08	1515.77	1343	1635.48	1748.72	1611.12	1809.92	1694.24	1422.5	1632.83	1272.62	1633.11	1634.51	1640.38	2046.23	1402.72	780.688
Peak_00759	2.51112	185.045	3165.45	2812.13	2354.77	2500.16	3065.68	2257.93	2618.97	2933.96	1346.44	2050.09	1962.4	2323.58	1730.49	1335.91	1260.09	961.857	1595.16	1860.42	1896.12	1318.7	3024.52	1450.74	2283.61	1837.72	1946.12	1809.39	1623.27	2091.03	1501.79	1604.85	1701.03	2260.66	2249.73	2383.28	2510.45	2722.78	2842.89	2241.21	2560.31	2795.94	1051.85	1402.37	1987.98	1798.96	1101.78	1318.24	1162.42
Peak_00762	3.31204	185.097	1293.81	1213.22	1142.91	1154.23	1727.63	1378.92	1392.18	1432.56	529.212	731.025	964.402	1022.25	823.395	800.652	1024.02	908.339	923.625	1567.15	1458.72	1488.09	1448.32	1810.87	1271.98	1374.97	783.438	793.936	815.394	1153.95	1045.44	850.202	932.177	936.113	1160.18	1388.94	1244.91	1384.49	1360.5	1268.92	1271.14	1416.49	200	547.414	983.004	730.458	573.157	828.103	933.984
Peak_00763	3.5465	185.116	3258.95	3402.78	1905.6	3843.41	2982.23	3470.53	2578.5	2731.6	2238.96	3985.3	2483.29	4056.98	3569.21	3435.54	3312.21	2403.04	1877.41	1352.59	1686.12	2088.67	2480.53	2186.16	3283.6	1529.49	3137.79	1039.11	695.148	2723.35	2053.42	3287.22	2536.15	2320.43	3091.01	3461.46	3100.67	3029.22	5036.56	3288.84	2383.27	2716.98	3162.82	3164.22	3475.8	3368.75	3222.4	2663.58	2812.66
Peak_00785	3.67214	187.076	7548.57	7021.79	6538.58	7276.81	7788.3	7407.99	6962.75	6965.89	4563.84	7060.27	5532.45	6166.3	6221.78	5822.9	5405.4	4248.1	3808.03	4026.09	5247.74	4096.99	6608.42	5660.44	6269.01	5895.58	5384.34	6097.68	5844.19	5967	4763.35	5243.94	5596.03	5141.95	6131.69	6771.53	6002.59	6197.36	7948.65	7104.74	5824.78	7563.99	4827.29	4762.55	5931.11	4987.2	4491.87	5042.01	4471.85
Peak_00790	2.57751	188.072	1523.81	1561.02	1253.36	1092.83	1536.39	1683.58	1529.42	1578.32	1612.09	3571.84	3648.79	2721.76	2598.76	2294.59	3931.1	1783.14	1779.44	1584.07	1529.27	1697.62	1742.41	915.001	1514.24	1752.12	2330.94	2321.06	2411.45	2218.08	1338.09	2090.07	2265.78	1098.22	1121.39	2209.28	658.729	1687.46	1093.92	1950.81	1240.17	3155.46	1154.82	3205.61	2969.97	3109.3	953.136	2513.36	1390.27
Peak_00791	3.75465	188.079	816.829	912.79	523.478	892.845	1239.2	742.372	767.635	955.764	579.142	847.98	538.385	664.919	200	634.492	576.366	679.463	200	200	477.05	662.131	691.728	652.252	603.267	596.633	701.177	694.79	190.831	200	200	698.98	630.039	603.988	686.42	735.437	586.061	958.298	200	712.598	830.553	923.807	697.799	603.496	988.579	435.966	564.582	456.084	417.725
Peak_00792	0.830715	188.093	1245.94	1114.77	1145.56	798.779	1300.95	964.873	1018.87	792.236	626.371	200	747.653	649.476	200	200	803.171	200	1074.95	1116.29	1360.13	1278.58	902.946	200	865.751	1107.04	664.192	814.4	200	744.101	670.797	587.587	674.641	589.458	1233.87	1348.72	1143.76	1428.65	1123.51	1011.72	1046.6	1112.32	200	476.264	484.117	626.673	200	530.9	439.878
Peak_00798	0.713649	189.046	814.375	135.064	361.765	618.525	200	108.773	200	560.459	200	872.243	743.581	869.089	1072.99	567.179	200	200	200	1032.91	200	200	469.153	200	619.529	445.457	922.246	1079.61	959.686	1055.58	19.9601	701.728	117.833	1078.79	200	723.653	938.248	401.412	777.642	200	99.1469	200	1118.51	883.455	1339.43	672.566	924.894	200	722.478
Peak_00801	4.2065	189.056	2775.92	3279.12	2428.03	2688.65	2770.51	2716.24	2755.67	2943.64	1820.96	2246.39	1955.5	2930.35	2430.14	2170.56	2099.21	1375.68	2202.3	1560.64	2284.62	1662.61	3244.39	2232.36	3210.74	2532.79	2312.19	2284.79	2280.12	2026.83	1862.86	2096.44	2392.84	2321.16	2758.3	2986.39	2953	2968.21	2955.75	2825.16	2539.98	2872.66	2255.6	1995.05	2694.23	2421.43	2565.78	1794.91	1847.8
Peak_00804	3.00904	189.128	200	200	200	200	200	200	200	200	1331.93	1214.16	1716.01	1790.47	1929.55	2004.53	1875.4	1936.26	200	200	200	200	420.904	200	271.279	200	1937.97	1794.08	1920.66	1774.99	2357.75	1657.29	1979.53	1782.14	200	200	200	200	200	200	589.415	525.122	1591.61	2017.29	3947.09	2164.63	2461.21	2338.42	2862.02
Peak_00814	0.640272	191.04	1100.05	1370.19	1039.37	956.276	515.309	1460.8	1193.92	1216.84	1232.88	966.859	1382.99	1358.6	1044.84	875.131	728.541	200	891.18	1375.51	1025.41	655.303	1197.95	200	1593.43	668.886	1740.77	2445.26	2511.92	1319.68	1030.31	1113.13	1097.95	1639.64	1332.93	1842.55	1696.66	1279.31	1577.46	1218.4	1060.64	1544.26	2441.91	2015.05	2937.09	2210.5	2659.26	2071.28	1689.17
Peak_00816	3.72223	191.071	1027.45	1086.54	775.994	911.985	1183.62	1099.17	1089.56	834.892	624.128	940.384	677.262	928.047	749.577	769.29	897.695	968.459	1067.69	795.913	880.686	936.394	1222.25	950.748	995.18	1389.65	962.558	848.143	200	686.175	622.734	605.685	827.208	776.858	857.074	1024.32	816.44	874.691	1073.28	1156.31	739.754	1135.95	785.362	696.863	911.214	200	670.477	537.382	377.141
Peak_00821	3.49614	191.144	463.571	200	200	444.423	119.83	290.221	200	200	876.977	721.025	1046.7	1034.13	913.667	951.976	881.667	1236.51	200	200	200	200	200	200	420.448	200	1309.26	1160	927.66	1091.53	1209.13	975.41	1253.74	1350.73	200	553.619	602.496	598.239	264.169	359.977	200	531.835	1197.15	1605.99	2352.53	1394.78	1493.63	1561	1446.99
Peak_00833	0.631247	192.057	8097.25	8128.29	7583.01	6927.96	2809.66	6622.25	6315.39	6764.8	10838.6	9258.9	9290.62	12352.2	8620.31	6888.48	7221.7	2401.72	5608.12	5354.56	6387.41	3342.25	6248.67	2706.58	7123.53	5070.84	12063.3	14180.1	14429.6	14439.3	8912.03	8547.68	10373.2	11059	6731.43	8005.09	9098.54	7808.32	9287.44	6071.23	5864.35	7698.55	14376.4	11721.9	14304.9	13802.7	11798.5	10644.4	12662.6
Peak_00836	0.713649	192.084	185.008	89.368	200	145.593	200	200	200	127.115	132.482	184.357	189.052	214.401	103.215	113.469	200	200	200	146.921	200	200	200	200	99.9074	86.3055	185.089	258.625	183.094	198.783	215.496	154.877	236.831	243.384	139.592	231.762	135.364	138.827	94.0712	111.877	72.5456	200	270.549	245.115	219.158	233.128	187.452	200	158.021
Peak_00844	0.640272	192.558	1761.45	1701.31	1911.64	1857.22	1234.34	1644.51	1382.69	1527.28	2734.38	2152.39	2316.21	2986.76	2024.67	1621.31	1886.17	200	1683.28	1588.55	1451.9	1401.35	1645.29	813.631	1652.63	1732.87	2901.54	3239.96	3526.35	3700.61	2561.21	2173.47	2375.16	3093.82	1514.56	2014.87	2573.61	1929.54	2386.86	1067.43	1311.13	1851.32	3046.2	3111.61	3310.03	3307.55	3108.51	2682.19	3368.05
Peak_00845	0.640272	193.061	3612.97	3816.85	4599.64	4437.74	3698.05	2944.15	4602.2	3448.88	5300.79	4831.96	4958.27	5663.93	4057.08	4085.28	3700.62	2521.97	3985.21	3636.38	3766.64	2544.5	3022.03	1146.92	3311.44	1851.98	4786.19	5517.05	4370.53	5178.43	5127.61	4558.78	3747.57	4322.47	2987.56	3585.48	6934.67	4251.6	4475.82	3344.09	3572.46	4075.34	5136.05	3967.66	7648.23	5513.63	4953.79	4838.71	5021.88
Peak_00846	0.830715	193.05	5319.13	5060.59	5891.7	5775.53	6174.05	4182.97	6705.41	4353.82	6919.81	5801.04	7046.11	6916.67	5290.46	5701.07	5289.68	3706.71	5303.61	4839.04	5473.87	3437.54	4698.04	1595.98	4655.44	2875.88	6124.6	6456.74	5361.49	6287.06	7711.59	6791.99	5562.1	5786.88	3905.81	4609.79	8549.61	5472.85	5749.97	4502.02	4889.98	5520.79	6567.37	4762.51	8814.24	6927.3	6171.35	6349.6	6036.94
Peak_00847	2.69318	193.062	963.622	908.539	1065.72	1040	1245.96	1140.62	925.134	1330.58	1123.72	1452.97	1334.94	2114.76	1723.15	1371.95	1530.95	1176	870.497	974.655	1001.98	1648.45	1057.8	1104.06	580.847	1075.72	1771.22	1978.85	1765.68	2125	2062.24	1960.32	1769.01	2223.37	811.808	1632.1	1242.64	1314.74	1084.51	986.219	1332.98	1507.72	1180.71	1231.3	1440.58	1711.66	1449.31	1474.41	1429.81
Peak_00848	0.66493	193.071	14718	15164	15067.2	14003.4	10837.7	12740.3	16613.5	12281.7	18128.8	18332	18007.8	18243	17627.9	14466.9	14613.5	8640.11	10965.9	10804.6	13988.4	7762.97	12620.2	3098.84	12823.1	9061.54	15035.2	17540	16551.7	19740	15745.6	16746.5	14271.7	14738.4	10870.2	11482.1	14374.5	13176.6	14791.2	11418.6	12535.6	14077.3	17406.4	13318.3	16209.6	17023.1	15776.8	16090.7	13491.3
Peak_00850	3.56329	193.087	200	200	390.997	200	200	200	200	200	715.651	935.409	1256.24	1352.06	1275.86	963.683	939.129	1197.11	200	200	200	569.28	200	200	200	200	1511.11	1165.01	1275.42	1420.81	1400.89	1037.27	1236.97	1603.05	200	767.405	802.812	603.953	503.646	200	505.254	808.237	1127.32	1054.88	1546.33	1496.84	1005.7	1091.13	1431.08
Peak_00859	0.746939	194.075	1163.67	1287.61	1001.85	1073.87	1082.54	882.795	1205.2	1147.04	1346.2	1388.32	1214.42	1455.6	1212.58	1023.78	1142.77	200	608.402	1182.03	844.081	718.245	892.255	347.688	1044.9	675.876	1084.25	1482.5	1341.35	1325.35	1111.57	1376.33	1165.87	1026.24	801.649	918.366	1178.47	1059.96	1232.37	970.729	1010.22	932.359	1378.69	1162.62	1428.27	1444.51	1033.58	1128.22	850.932
Peak_00864	3.31204	195.081	1129.78	906.16	672.223	866.303	1017.64	960.215	985.168	987.731	200	200	573.089	852.751	685.624	633.779	567.857	447.752	874.312	863.087	1116.55	585.215	1022.74	200	1020.13	683.11	614.408	482.829	200	841.923	600.334	200	609.459	577.652	872.145	1019.27	857.068	927.969	1167.1	881.711	957.725	1078.81	200	200	648.402	200	485.741	200	752.525
Peak_00870	3.49614	195.139	953.598	1029.41	673.505	716.33	1260.98	819.894	697.408	865.641	335.634	437.817	537.592	618.325	200	488.557	200	200	1152.78	200	200	1229.09	1157.08	1356.69	888.387	778.848	650.67	376.455	436.294	495.431	200	546.455	615.636	426.848	1303.83	1496.21	961.429	1348.09	918.119	1041.12	1005.3	1305.19	402.614	487.898	618.289	504.97	200	542.211	200
Peak_00872	-0.0909927	195.175	941.155	1110.73	630.146	608.153	585.86	1192.09	675.68	200	992.263	850.897	768.903	858.1	891.199	856.334	868.27	200	200	750.849	597.166	684.865	928.258	200	981.701	873.602	788.125	848.224	1182.84	1204.99	200	948.064	992.886	1000.77	706.608	825.907	1156.28	200	921.673	893.153	563.005	921.688	808.225	1234.32	1143.47	1398.65	965.745	995.394	613.136
Peak_00886	0.763696	198.032	421.966	466.704	371.988	308.556	388.485	493.252	445.523	280.424	449.828	475.15	343.364	744.143	356.971	429.439	609.193	200	200	520.793	391.225	340.894	378.795	200	596.458	481.683	496.332	665.191	750.527	549.781	467.256	398.937	478.591	530.728	452.94	409.334	433.727	456.567	477.201	417.901	372.78	425.429	615.031	522.692	623.454	513.424	768.237	660.253	456.978
Peak_00887	0.697057	198.056	3377.03	3955.78	3286.97	3291.28	1456.83	2493.22	4013.28	2837.55	4411.07	4106.28	3722.65	4569.24	4052.52	3112.4	3205.03	915.462	2527.43	2364.03	2998.16	2486.51	2581.71	1083.18	3463.41	1739.26	4683.96	5736.52	5305.2	4639.93	3493.3	4001.86	3757.46	3972.4	2496.78	3033.84	3564.16	2765.61	3849.04	2497.45	2738.62	3265.65	5055.53	4253.14	5455.42	5326.84	4405.55	4922.02	4272.12
Peak_00892	0.713649	198.557	835.925	842.747	909.656	819.715	200	820.302	964.616	200	1163.58	1120.08	1075.6	1286.73	1002.02	677.01	770.44	200	800.792	1098.37	200	701.165	940.352	200	200	680.823	1203.07	1271.35	1495.21	1250.67	836.186	896.4	857.004	990.213	675.055	740.862	898.307	751.646	939.17	599.062	650.043	820.4	1286.29	1111.56	1562.95	1309.07	1374.43	1281.51	1387.04
Peak_00893	0.532388	198.941	10773.3	8979.17	9883.62	6668.26	5361.96	10286.8	8636.5	9391.79	8697.28	7263.13	7326.48	7661.66	8367.07	5804.04	5183.5	3603.69	6269.38	7133.39	9500.37	3312.92	10474.8	5022.27	8559.28	4590.43	9052.15	9614.03	11838.1	8384.84	6774.07	6158.94	6366.5	7944.23	8261.55	9426.91	9337.58	7421.12	10317.7	6727.97	7639.41	9196.97	10271.5	9203.21	12854.7	9594.1	13137.2	8824.88	8260.35
Peak_00895	0.713649	199.057	622.747	660.362	527.455	569.876	444.719	380.172	638.265	466.284	738.309	650.098	600.118	889.054	900.331	416.685	375.092	200	419.175	607.542	542.936	560.315	445.436	200	476.558	200	703.789	907.688	1025.91	771.205	717.616	592.968	526.939	688.176	423.087	535.769	592.213	519.598	560.71	549.637	482.236	537.732	1023.26	811.516	1002.52	993.525	788.522	861.209	637.712
Peak_00899	2.62688	199.097	1591.39	1295.79	1751.92	1180.55	2047.77	1612.36	1317.57	1609.85	2111.96	1977.01	3314.09	2567.22	2592.43	2245.49	2209.11	2224.89	1416.59	2105.55	2280.16	1378.87	1742.26	1333.95	1531.66	1325.01	2988.42	2013.25	2125.68	2449.68	3351.55	2528.98	2876.84	3109.65	1689.3	2346.92	2609.06	2079.24	1832.66	1495.51	2001.38	2268.26	2301.31	2467.58	3751.1	2496.41	2527.91	3008.36	3135.4
Peak_00905	0.570455	199.942	1837	200	1623.31	200	1062.31	1361.36	1157.62	1602.16	1466.47	200	1187.65	1109.3	1262.76	200	200	200	1244.01	1451.37	1489.34	200	1562.95	618.355	1011.13	200	1208.55	1350.86	1878.67	1353.75	1427.59	957.581	200	883.107	1156.35	1473.36	1371.77	1105.5	1546.71	784.829	1228.01	1522.97	1266.89	1193.08	2111.53	1410.75	1685.54	1342.14	1407.68
Peak_00906	0.640272	200.046	2612.35	2366.74	2199.82	1871.52	894.342	2179.59	1654.07	1691.76	2201.52	1471.91	1362.5	1287.81	1338.69	1106.28	1057.12	200	1095.24	1173.7	1465.81	766.158	1907.93	200	1395.31	1149.82	2750.59	2307.04	2484.08	2165.34	1257.52	1414.28	1257.45	1660.78	1743.65	2117.95	2611.77	1639.43	2360.34	1271.35	1247.71	1669.83	3301.74	2629.75	3400.36	3008.35	2596.23	2045.81	1840.67
Peak_00911	0.570455	200.939	1178.65	984.732	1165.82	900.939	1327.01	1174.5	1113.83	1129.59	1057.54	771.485	890.704	1065.26	1007.16	928.908	636.694	200	971.212	1525.82	1138.25	200	1487.68	200	916.749	608.126	1076.41	1162.85	1506.8	1047.78	1578.11	800.493	724.216	982.04	991.081	1215.63	1421.26	893.809	1426.81	786.621	1046.34	1126.99	1597.72	1039.13	2055.53	1255.78	1682.94	1278.95	1274.27
Peak_00912	0.532388	200.974	5189.3	4827.05	4735.4	4748.82	3662.99	4493.19	4646.01	4556.14	6568.03	4763.63	5766.01	7926.9	6113.62	5584.12	5503.64	3980.12	4871.06	4248.26	4202.63	5415.59	5554.25	3700.93	5485.97	3508.38	6914.69	7362.59	6681.46	6499.62	6919.01	6574.8	7217.1	8053.6	4995.51	5295.03	5173.8	5664.71	5843.21	4769.27	6334.9	6786.36	7103.69	6167.99	8525.55	8065.98	7925.95	7597.3	6953.75
Peak_00917	3.2281	201.092	609.919	753.544	678.205	667.417	938.069	750.301	807.515	780.014	200	569.81	545.713	712.589	704.776	915.343	622.537	690.251	558.812	897.053	933.536	816.199	705.212	881.219	730.608	586.282	569.509	712.285	728.036	817.482	600.383	540.77	702.929	755.442	746.886	957.655	1079.17	721.612	1145.57	629.371	553.748	705.193	441.035	550.113	628.867	417.607	627.454	200	743.897
Peak_00921	0.54542	201.975	1793.28	1600.6	1306.14	1310.85	200	1417.86	1285.34	1400.26	1604.58	1642.57	1636.98	2260.53	1907.7	1623.05	1593.94	1334.45	1246.98	1346.59	1304.84	1313.15	1381.43	627.369	1482.54	1917.12	2094.27	1898.25	2117.02	2219.42	1574.22	1855.37	2373.7	2484.79	1386.66	1498.14	1478.7	1636.05	1563.4	1449.64	1443.18	1761.2	2253.17	1669.13	2890.59	2468.84	2028.66	2222.73	1837.87
Peak_00925	0.54542	202.972	1710.75	1593.41	1571.03	1577.76	1361.46	1640.35	1587.56	1527.43	1734.32	1563.74	1603.49	2342.86	1978.3	1874.66	1581.73	1145.15	1394.09	1375.26	1609.58	1111.53	1698.74	1078.29	1728.6	2082.01	2139.67	2364.52	2471.94	2340	1750.87	2013.37	2438.68	2760.25	1648.8	1770.22	1594.02	1747.85	1900.55	1452.1	1772.77	2089.38	2316.25	1839.43	2568.72	2395.93	2394.4	2344.56	2449.82
Peak_00927	0.631247	203.053	668.492	843.182	662.314	827.517	793.99	733.761	643.943	1015.06	990.636	746.818	1365.48	835.323	846.025	438.245	748.53	200	862.154	744.125	541.478	797.265	668.513	200	746.953	870.385	906.198	1165.08	1789.45	964.534	841.435	661.456	581.234	645.655	1057.52	545.461	879.77	643.309	1074.69	672.52	709.891	628.175	1129.96	1087.9	1234.35	1831.18	1392.99	955.719	1366.19
Peak_00929	3.77045	203.071	1042.52	1211.2	869.51	1262.11	1124.57	901.696	1050.88	1129.86	716.913	1200.09	807.743	1103.31	979.387	878.607	780.512	956.734	1006.38	948.857	759.475	969.425	1130.95	1181.47	1226.68	1314.71	922.287	904.335	788.599	782.64	643.855	796.779	877.028	855.737	1081.71	1374.54	1188.7	949.835	1135.77	1382.11	994.31	1163.37	849.441	200	1276.35	769.88	709.714	733.292	1050.54
Peak_00932	0.640272	203.565	1393.89	2284.45	1452.96	1477.29	874.608	1797.85	1957.06	1609.27	2601.92	1880.96	2761.08	3371.93	2013.23	2149.68	2549.4	530.49	1814.7	2037.24	1395.46	1594.29	1634.58	865.636	2182.4	1181.18	3515.42	4402.37	4155.04	3254.68	3009.42	3013.38	3349.43	3635.65	1984.2	2533.17	2781.42	2411.6	2229.42	1917.79	1786.72	2737	4076.85	3386.23	5113.8	4410.28	4224.53	3696.5	3718.67
Peak_00934	0.746939	204.034	85.7561	101.204	200	200	200	200	66.3347	190.107	94.7737	72.7306	272.635	371.074	97.3205	207.341	55.9056	200	200	200	35.5274	200	24.7138	200	105.743	200	295.697	601.215	511.222	432.717	365.165	244.16	266.003	337.843	122.219	150.528	301.912	238.582	88.0711	36.5107	201.205	217.716	390.084	343.174	656.499	497.403	305.253	332.083	352.215
Peak_00935	0.830715	204.029	339.281	550.242	438.243	504.797	225.552	219.639	681.011	431.586	546.196	403.337	603.277	852.075	434.958	609.557	573.192	200	200	536.348	320.863	200	351.96	200	401.794	200	727.089	1062.39	1186.61	791.843	650.35	919.859	781.264	878.648	240.222	506.78	503.447	487.58	537.901	398.681	368.24	560.581	1051.79	778.44	1298.96	1149.99	1025.28	940.306	855.163
Peak_00936	0.947153	204.037	134.098	250.143	63.0513	370.288	200	180.154	557.238	208.678	364.836	224.782	424.024	606.071	266.213	353.358	353.09	200	200	258.333	142.475	200	238.6	200	141.582	200	508.419	769.647	863.389	464.65	428.308	538.185	500.118	643.967	104.587	139.094	64.5107	158.444	265.63	109.597	201.181	396.346	647.499	455.687	933.579	816.451	584.463	526.452	637.051
Peak_00937	0.640272	204.058	1571.51	1801.76	1478.47	1453.61	588.457	1292.27	1834	1056.8	2551.83	2378.21	2566.14	3516.91	2218.08	2311	1984.17	768.579	1011.48	1240.53	1358.49	920.236	1392.07	413.225	1636.89	1172.09	2711.23	4281.95	3597.74	3791.23	2659.95	2836.18	2403.36	3144.19	1094.55	1349.88	2033.76	1429.54	2114.51	1390.63	1512.67	1724.77	3238.12	3275.93	3852.18	3986.49	3185.83	3503.18	2925.34
Peak_00938	0.654009	204.088	5259.33	5384.13	5303.69	5007.73	3399.73	3865.72	5360.44	4121.96	4394.27	3756.27	3523.87	3416.16	2729.22	2281.29	2193.13	1304.29	4564.55	4683.09	5378.77	4065.77	4156.6	1620.83	4295.14	3461.33	2951.47	3087.71	2666.29	4143.16	3290.96	3184.62	2998.15	3446.57	4524.7	5355.62	5141.41	5912.49	4100.1	3681.94	4212.94	4334.84	2745.75	1929.43	2422.79	2568.75	1463.76	1855.88	2018.98
Peak_00941	0.697057	204.56	327.299	473.977	430.879	507.732	248.246	387.032	677.122	473.647	738.141	615.893	677.803	1001.96	699.82	730.033	478.392	171.116	631.733	551.923	412.806	315.184	457.736	200	566.342	314.032	980.449	1265.13	1291.9	1050.16	751.166	887.634	1142.64	1133.96	402.347	517.611	711.707	501.692	617.415	517.461	575.099	750.067	1115.96	1075.48	1248.25	1125.67	1028.48	1108.74	1030
Peak_00943	0.640272	205.051	218.252	271.721	162.375	216.467	200	345.553	358.781	208.8	367.136	290.052	475.103	581.009	312.767	439.528	274.346	200	253.113	233.812	185.089	289.603	257.933	200	356.084	207.765	546.085	708.986	746.563	618.538	503.075	493.659	587.977	522.293	203.75	315.356	408.955	288.356	228.144	291.391	316.836	268.629	535.617	549.981	725.402	655.004	555.641	471.491	508.391
Peak_00944	3.77045	205.05	1024.93	1184.14	876.751	965.286	1261.15	995.403	1163.88	953.291	749.946	898.242	862.991	1006.94	977.242	1041.17	790.159	614.796	681.729	690.037	742.521	893.887	975.461	1084.05	1071.26	925.845	885.454	858.594	828.698	878.968	200	851.218	906.826	774.781	1014.96	1074.02	840.59	1040.17	1003.52	1113.59	957.803	1154.46	751.769	802.346	1219.88	776.195	733.685	818.249	969.887
Peak_00945	3.65573	205.071	2527.39	2825.37	1639.56	2919.21	1805.61	192.418	2564.77	1503.91	729.013	1908.78	748.122	171.849	474.049	440.329	729.999	1329.06	1786.09	1166.99	1111.6	1246.65	2302.81	1629.43	1404.43	1497.08	259.645	119.827	200	275.227	359.511	115.296	200	65.9023	334.541	1270.48	996.271	1395.75	3026.18	2659.37	1089.72	2002.59	514.075	19.6985	915.011	260.618	419.932	200	200
Peak_00947	6.19132	205.086	878.644	943.133	754.498	200	825.571	1022.84	603.086	1036.86	659.734	799.177	656.085	930.099	1160.55	924.85	1224.49	851.172	200	780.813	835.876	1130.53	877.779	1081.02	841.24	884.905	1144.96	1016.34	1187.96	870.119	765.465	707.815	792.465	766.807	200	974.422	848.033	813.724	784.518	866.96	793.096	200	606.156	645.982	956.724	901.955	900.071	755.118	868.235
Peak_00949	2.57751	205.099	1839.61	1658.27	1795.78	1514.63	2845.36	1866.24	1975.01	1662.75	2065.53	3859.23	4591.81	3201.35	2968.43	2878.03	5318.79	1725.2	2788.5	2067.69	1625.85	2706.17	2089.14	1696.16	1544.56	1473.37	3008.96	2525.51	2583.12	2806.5	1919.73	2477.46	3021.25	1470.43	1652.24	2602.4	759.486	2021.73	1085.57	2056.85	1397.91	3863.85	1724.91	4221.28	4713.9	3898.99	1374.8	2784.57	2073.55
Peak_00951	4.57608	205.144	3504.38	2904.4	1849.27	4961.01	3343.6	2758.17	533.273	2887.02	2296.42	2879.71	2372.86	6877.77	3109.98	2294.12	2456.84	1647.14	2882.4	1473.67	2342.24	2503.1	2586.73	3347.47	2742.79	2041	3129.09	2910.06	2429.2	2040.51	2992.23	2825.74	2399.52	2732.98	2276.12	3030.83	2309.78	2532.52	6419.66	4039.25	2527.07	2513.56	3343.44	3045.58	4512.18	2851.98	2735.5	2365.82	2076.39
Peak_00955	0.697057	206.046	737.479	994.322	668.714	617.916	374.654	666.611	995.041	743.806	747.57	583.96	603.789	649.795	873.319	457.138	563.733	200	295.331	699.322	726.354	200	660.202	200	650.824	200	996.828	1115.83	1017.28	646.725	741.25	579.936	605.932	526.761	709.732	808.035	908.598	476.591	953.308	538.258	826.195	814.07	1140.06	1139.91	1299.71	1014.34	1010.1	859.177	918.037
Peak_00958	0.746939	206.103	732.02	648.857	565.196	566.985	956.604	200	622.227	602.25	412.877	200	200	347.335	521.757	265.821	313.144	200	200	829.802	200	844.224	528.02	200	635.749	859.769	388.54	282.274	416.777	324.497	534.606	324.645	200	539.807	687.618	989.451	380.933	797.985	634.015	563.186	578.601	753.746	405.41	293.703	455.406	335.665	386.163	342.678	377.712
Peak_00962	0.646968	206.887	3238.27	3730.98	2654.9	3112.6	2562.66	4094.18	4567.63	4254.55	1933.31	2398	1643.35	1486.45	3342.68	2309.76	1904.93	2226.82	2541.3	2762.66	2519.68	2002.21	3728.63	2559.32	3060.45	3064.13	935.987	854.759	548.755	1136.58	2551.28	1773.49	1509.64	1420.33	1898.7	2445.51	1475.97	2211.83	3204.45	3416.97	2668.88	3004.34	573.693	200	200	547.022	907.503	1353.24	911.316
Peak_00965	2.64366	207.102	1887.24	1538.47	1562.59	1363.38	1786.45	1437.03	1364.58	1727.09	565.888	473.643	865.435	831.925	640.982	200	451.543	200	1703.32	1566.83	1563.27	1412.91	1742.76	1884.99	1400.06	1391.47	608.462	702.847	200	894.006	856.858	578.054	740.528	619.246	1907.76	2027.17	1416.84	1970.34	1825.4	1445.39	1475.62	1834.85	351.046	451.95	609.031	681.198	353.863	200	811.007
Peak_00975	2.99224	207.139	4866.5	3975.85	5037.48	3751.39	5988.53	4124.25	4621.27	4581.96	10439.7	8942.49	13122.1	15979	11836	14268.5	14716.1	10544.1	3583.8	3703.24	4009.41	3045.16	4413.3	2651.93	3919.55	2086.33	17427.8	14907	15397.5	12027.8	15761.7	14291	16320.4	17575.6	4498.72	5572.27	6509.19	5163.33	4106.66	4220.93	5479.46	6256.56	13462.8	17652.4	26846.2	18818.4	20843.3	19615.5	23705.3
Peak_00979	3.00904	208.142	711.889	200	589.947	200	925.955	200	545.492	683.864	1439.62	1583.39	2192.44	2241.91	1855.35	2053.25	2098.71	1529.27	379.791	200	200	618.611	200	506.389	200	200	2292.44	1912.87	2547.48	2054.94	2450.01	1990.74	2389.87	2359.6	459.172	933.277	867.999	200	514.955	200	678.403	1104.37	1615.17	2574.03	4159.93	2723.58	2805.28	2852.2	3096.08
Peak_00984	1.19285	209.045	1790.64	2086.77	1561.11	1687.89	1879.64	1705.68	1804.31	1635.61	1190.33	909.876	928.278	973.838	1012.37	985.448	760.385	200	1143.77	1831.98	2242.31	1476.59	1998.5	890.671	1971.4	1677	1344.9	909.485	965.403	1244.2	1211.77	1108.02	966.348	1338.04	1800.27	2146.18	2015.26	2934.6	2022.5	1963.67	2315.35	2870.08	840.783	611.745	1092.86	1010.63	649.622	638.583	772.239
Peak_00988	3.5465	209.082	748.958	993.205	962.556	1163.33	1285.53	1081.49	1180.75	973.79	2949.48	3053.37	3081.66	4246.01	3176.79	3241.78	3428.62	2524.01	200	1228.39	1007.9	1654.92	891.072	999.361	1306.65	1168.18	4003.75	3491.84	3623.51	3954.99	3249.73	3480.23	4221.57	4189.65	1081.8	1699.06	1951.13	608.773	1209.5	1232.8	1340.12	1420.11	4118.96	3336.34	5144.45	4587.4	3868.85	3486.61	3654.23
Peak_00993	2.90844	209.118	3212.19	2812.72	2228.63	2693.76	3710.29	2538.32	2445.26	3242.6	959.446	1346.51	1085.68	1720.02	1401.88	1187.96	1687.15	1886.84	4910.55	3045.79	3046.34	2584.88	4364.44	4515.87	2612.63	3214.35	1290.85	1444.8	1123.8	1475.61	1618.5	1164.37	1787.49	1609.9	4416.9	4075.31	2979.47	4118.15	3538.55	3443.35	3393.62	4681.83	988.761	810.763	1499.59	1708.49	935.943	1164.55	1617.47
Peak_00994	-0.0909927	209.155	3224.21	4178.7	3027.52	2978.69	4147.99	3962.84	2875.75	2344.27	3818.08	3077.69	3892.72	3536.31	3466.32	3395.65	2971.88	3096.16	3322.17	3072.59	2515.35	3490.03	3630.05	1685.74	3749.08	2771.06	2910.56	3283.48	2896.42	3107.04	4206.11	2803.42	3189.29	2990.55	3247.46	3016.37	3962.66	4048.43	3729.07	3877.94	2670.82	3925.92	3372.81	3855.61	3537.96	3464.43	2910.67	3761.98	2527.29
Peak_00995	3.05839	209.155	1661.02	1297.12	1416.45	1198.35	1507.05	1321.38	1288.76	1465.41	4066.65	3807.39	4389.57	5913.87	4736.86	4971.28	4796.89	2925.11	1378.86	1155.33	1369.89	984.383	1304.52	860.263	1236.43	200	7390.92	6423.61	6293.04	6066.61	6258.4	5666.68	6751.66	7124.12	1763.23	1952.69	2484.44	1721.03	1260.99	1359.43	2298.17	2640.45	4869.83	6581.84	9199.54	8180.22	6199.29	6279.49	6865.08
Peak_00996	3.44579	209.155	2538	2601.14	2265.13	2252.9	3007.66	2096.25	2437.23	2351.35	3811.2	3135.25	4546.92	4653.59	3405.31	4093.84	4052.08	2530.62	1569.56	2121.18	1419.5	1656.68	2364.19	1862.83	1953.72	1392.87	5665.02	4430.51	3797.11	4812.76	4961.23	4716.26	6156.16	5830.74	2273.27	2910.43	3180.39	3127.59	1809.85	2328.71	3085.66	3484.55	5649.32	6138.61	9006.62	6765.5	5596.29	5740.28	5329.53
Peak_00999	-0.0909927	209.191	9404.84	11049.6	9063.49	7685.49	5776.87	11204.4	10055.4	6540.82	10300.1	9862.97	10420	10251.4	10864.3	9583.1	8999.76	4795.79	7714.93	8018.74	7858.65	5971.42	9831.68	5869.71	11485.9	7722.57	9635.39	9992.42	7708.18	10253.4	9840.19	9592.69	11645.3	11018.9	9535.75	9502.41	10447.7	10892.9	10452	10273.7	8585.17	10978.2	11203.1	9104.66	10860.9	11179	9218.99	10432.7	7352.59
Peak_01005	3.24489	210.055	200	723.621	417.055	693.501	701.818	522.97	458.491	374.433	695.619	942.557	748.959	709.041	970.822	773.435	849.195	745.211	576.805	733.973	590.091	577.467	824.683	596.34	759.152	742.675	200	668.296	669.377	566.027	558.338	783.621	980.358	527.314	492.73	665.75	737.636	519.818	200	651.167	200	630.345	1113.72	853.994	853.473	826.434	886.93	882.341	763.368
Peak_01006	0.830715	210.062	200	200	452.497	200	650.61	708.853	663.56	200	310.616	200	336.145	474.882	431.281	574.733	823.396	330.263	684.908	592.299	399.128	200	512.299	462.994	333.691	899.039	349.549	722.788	717.645	413.589	722.28	394.713	200	510.113	200	200	200	200	748.507	612.252	460.762	738.471	690.528	546.814	844.59	762.57	903.078	819.354	735.901
Peak_01016	-0.0909927	210.194	1280.89	1307.01	1299.42	996.26	1528.97	1387.98	1192.88	1263.65	1825.25	1367.58	1274.48	1447.54	1222.93	1296.65	1278.45	1218.64	1160.38	1202.02	1096.32	200	1214.69	200	1593.96	200	1157.37	1501.01	1467.83	1324.43	1277.83	1049.14	1478.77	1336.09	200	1350.05	1454.48	1301.54	1572.91	1769.96	885.63	1180.95	1572.81	1209.84	1786.92	1096.66	1440.46	1244.07	1438.68
Peak_01020	3.77045	211.061	795.821	200	580.342	777.474	880.297	899.644	855.176	820.375	200	946.857	630.065	895.222	1050.47	807.95	658.359	671.673	627.581	758.877	534.097	608.054	969.103	200	200	781.725	604.648	692.523	604.385	620.16	200	638.289	807.783	643.522	827.482	955.887	829.49	634.428	1038.6	1075.99	200	904.057	558.113	573.941	834.992	703.058	546.156	546.326	671.21
Peak_01021	4.22323	211.076	1621.6	1517.23	1300.99	1364.34	1579.38	1612.59	1373.59	1401.4	1000.08	1061.72	1151.25	1256.49	1397.49	1040.61	1197.66	833.059	701.553	795.935	1251.07	981.055	1705.9	1103.93	1588.99	1495.91	1312.04	1252.18	1148.53	1060.32	1190.14	1194.45	1268.81	1304.24	1394.62	1710.51	1831.99	1597.19	1629.47	1594.2	1388.29	1572.05	1047.88	956.549	1315.3	1162.13	1243.5	815.153	1046.02
Peak_01024	2.99224	211.134	2752.47	2533.85	1917.08	1998.88	3479.84	2423.43	1927.49	2740.78	1185.57	1317.31	1290.76	1766.73	1501.24	1464.98	1818.05	1456.13	3714.4	2309.66	2195.22	1889.98	3822.26	3295.87	2127.1	2091.98	1722.44	1828.35	1181.75	1469.37	1690.53	1748.28	1976.44	1647.9	3766.51	3353.43	2216.25	3277.6	2943.01	2649.22	2519.92	3482.04	1286.33	1285.91	1880.4	1638.24	1278.18	1316.59	2369.28
Peak_01026	3.51293	211.17	3431.93	2973.45	2617.11	2891.58	3223.44	3133.9	3046.38	3302.12	2883.96	2806.03	3489.04	4183.51	3145.8	3480.64	3365.92	2090.3	1956.6	2163.75	2049.02	2008.92	2636.75	2072.11	2676.68	2210.06	5451.47	3574.63	3279.21	4426.6	2922.33	4182.29	5042.07	5398.28	3047.2	3978.75	3782.81	4100.28	2433.28	3432.94	3689.58	4051.76	4067.79	3853.78	5709.3	5197.19	3650.92	3432.61	3199.62
Peak_01028	-0.0909927	211.206	1654.39	1866.98	1635.01	1176.13	1839.55	2130.64	1849.41	1938.25	2122.4	1783.23	1834.9	1798.64	2523.11	1874.81	1537.48	1601.55	1203.4	1805.41	1330.2	1053.59	2277.86	834.722	2084.91	1451.58	1660.45	1866.14	2067.66	1695.63	2046.71	2138.57	1681.23	1973.92	1530.96	2041.95	1892.55	2152.98	2065.77	1720.25	1533.7	2032.05	1356.48	1417.07	1976.98	1605.15	1760.01	1899.37	1278.3
Peak_01031	0.697057	212.042	326.579	471.765	307.172	256.874	329.533	308.906	453.996	413.786	459.382	352.647	445.392	546.617	592.068	256.252	271.809	200	200	298.874	375.118	200	200	200	305.918	200	477.743	873.912	697.646	567.095	654.398	442.219	382.726	540.634	324.98	313.541	526.225	188.879	411.209	200	166.441	373.293	808.057	781.941	938.728	845.774	802.703	674.598	660.145
Peak_01040	0.621449	212.848	973.084	1027.41	824.937	931.54	634.271	1334.14	1482.36	1116.94	875.084	819.507	703.811	565.278	1269.41	914.544	968.938	927.828	757.243	893.817	1116.4	1008.22	1213.43	775.117	1037.45	722.749	491.094	401.578	364.852	559.901	605.354	662.198	794.662	524.489	1157.9	1719.87	895.619	1273.43	1465.45	1586.32	1315.96	1562.73	396.437	348.744	439.057	310.833	404.393	695.199	322.98
Peak_01041	3.32882	212.863	239.103	213.391	247.706	208.716	312.473	190.883	220.301	328.638	200	200	110.443	141.124	200	127.775	176.839	200	176.626	241.044	308.861	242.406	251.483	194.684	205.539	196.269	84.1325	94.0675	176.073	121.225	184.906	140.597	149.573	212.455	238.861	272.582	245.648	249.823	245.566	286.707	242.042	256.588	200	200	262.266	80.6775	200	200	147.502
Peak_01048	2.46156	213.075	270.435	200	349.779	138.791	236.149	200	186.207	142.578	925.77	725.923	1002.86	843.881	884.11	625.849	643.798	547.174	172.139	213.647	200	165.052	244.7	200	286.141	200	895.123	893.356	939.503	765.23	896.622	521.684	886.096	913.494	219.188	272.814	469.098	206.564	232.714	231.087	167.349	402.76	873.68	1062.02	1298.97	1097.57	811.667	1094.54	933.278
Peak_01049	2.32751	213.092	13162.4	10659.5	10927.4	9618.96	13845.4	10666.2	9970	10619.6	7094.92	8099.76	8842.83	8806.28	9001.97	6782.93	7380.41	5552.15	5906.55	12424.1	8755.39	7936.28	12851.9	3555.06	10554	8995.58	6914.44	7973.59	6934.51	7590.89	7024.93	6870.53	8233.04	8323.86	10859.6	11302.1	10091.5	11917.2	12016.9	10741.9	9435.12	13813.7	3956.21	4305.93	6472.17	5173.95	5083.41	6107.79	6276.02
Peak_01050	2.56097	213.092	5284.6	3838.88	2988.81	3009.66	5439.73	4494.21	3239.88	4028.44	2473.44	2999.85	3982.17	3590.18	3375.53	2567.74	2595.91	2399.52	3706.18	3433.03	2599.62	3096.81	5470.2	2756.61	3502.26	6819.31	2589.54	3381.64	3722.78	3122.51	3656.32	2604.48	2789.6	3347.3	3872.32	2834.34	2796.96	3134.46	5085.78	3508.89	2835.58	4358.32	2332.24	4643.35	6077.16	4059.86	6051.03	3865.46	3687.37
Peak_01051	3.2281	213.092	325720	329024	361970	318729	506843	352413	368590	377487	191565	213824	244536	273477	277167	218786	246622	207766	229598	406936	386980	277663	379347	237878	345085	291557	234523	236846	254664	279358	288585	251082	237955	284343	317087	402924	332251	382214	375482	328363	353479	425871	170383	176551	279778	212904	216292	196749	281579
Peak_01052	4.15622	213.093	68726.6	66199.4	71331.2	64000.2	74418.4	60909.6	58586.6	66786.8	35326.6	39459.4	44645.1	55379.8	46845.9	38158.5	43453.1	35457.5	46309.5	47648.8	59559.7	55859.2	66749.1	39091.1	62720.5	53644.2	44329.5	44401.4	46227.5	50115.7	51157.3	43033.5	45051	52586.5	62247.3	74151.8	70064.7	68287.1	64722	58603.5	61170.4	72491.1	30759.3	34160.4	45917.9	43816.3	39007.3	35962.2	41913.6
Peak_01054	4.99851	213.092	1130.8	200	611.289	905.172	1509.13	1440.28	1090.27	1133.61	200	200	553.572	525.795	1139.41	200	200	518.661	1586.9	730.659	829.453	1412	1750.73	1843.64	1423.7	2460.95	499.594	1331.51	1794.72	200	708.815	200	491.254	874.566	1121.52	961.034	461.775	777.439	556.337	649.923	1042.83	809.997	297.13	451.573	927.609	200	518.458	509.142	200
Peak_01055	3.58004	213.131	275.999	213.539	135.037	243.202	333.739	299.854	212.228	357.597	45.173	25.8387	49.5308	62.159	34.2063	76.8515	47.9247	156.421	159.335	334.692	200.36	172.96	308.375	208.481	329.643	273.119	117.09	140.207	151.05	92.154	122.362	133.153	105.52	160.037	242.436	271.104	136.445	369.551	224.991	283.911	325.467	306.593	122.185	49.4644	151.267	127.337	137.855	64.4009	58.9502
Peak_01056	4.22323	213.134	719.051	657.885	733.498	693.383	555.685	509.087	591.067	677.864	310.591	374.285	457.811	451.297	372.268	435.807	378.016	266.878	406.01	445.719	532.388	502.439	535.241	512.378	726.938	491.551	490.895	456.246	451.132	476.54	489.587	509.999	464.102	517.213	653.239	791.175	727.302	761.426	633.055	733.795	741.468	910.691	411.753	394.975	484.351	520.899	336.497	308.631	329.568
Peak_01057	4.45831	213.147	541.792	729.681	366.466	918.704	1466.15	801.809	1008.46	473.063	1149.33	938.027	1006.18	1420.88	1459	1252.05	1252.94	1313.5	910.035	646.489	1236.79	69.383	657.949	1029.1	574.169	61.9266	507.44	1177.72	954.574	596.202	1196.11	1158.67	469.915	527.592	539.746	1090.35	662.077	479.344	804.957	904.667	732.762	657.611	993.604	1146.91	1170.43	573.621	1382.16	1488.54	1204.54
Peak_01059	3.29525	213.165	1364.36	1436.85	1052.48	1404.11	1417.49	1199.16	1558.06	1335.03	700.226	684.982	965.721	1005.85	956.909	729.7	908.967	735.264	616.037	1235.87	1279.47	670.427	1174.89	567.331	1470.29	1091.38	957.293	932.655	868.843	1004.48	864.884	1058.15	963.035	1238.47	1317.53	1490.04	1206.02	1657.62	1482.54	1488.02	1490.03	1586.72	708.868	763.54	999.225	982.475	789.839	684.742	835.284
Peak_01060	3.37908	213.416	157.89	126.102	187.593	151.632	160.46	131.489	148.852	164.489	200	200	200	129.966	140.279	68.2602	200	200	120.045	153.196	150.319	209.184	161.031	176.909	136.171	107.433	200	200	200	91.4332	116.809	96.1638	114.475	84.0912	119.057	159.831	120.8	218.449	182.79	146.652	176.679	181.247	200	200	98.884	76.3321	62.3174	60.4945	87.9766
Peak_01066	3.2281	214.096	54268.8	58650.3	48962.7	55330.3	58746.6	58181.4	61505.2	61738.9	28472.5	33369.9	36039.6	41210.8	42365	34372.9	36717.8	25443.6	26131.2	52111.1	57734.3	34367.4	57778.6	27988.4	60729.7	46973	42504.9	38161.6	38199.7	43503.4	35072.2	42463.1	40552.8	47667.3	54475.2	64925.4	58159	66019.9	59789.8	58110.5	60506.6	62960.8	29916.7	31039.8	43506.8	37333.1	34027	28207	33417.2
Peak_01067	2.34321	214.095	1885.63	1707.79	1412.36	1585.6	1688.39	1493.41	1616.76	1666.66	1030.54	1157.9	1388.99	1279.78	1298.57	1036.25	1095.81	1102.09	1441.75	1443.06	1223.42	1368.11	1712.51	714.239	1561.32	1254.29	934.24	1182.7	911.582	1095.42	856.748	850.772	1258.78	1167.53	1666.75	1711.87	1505.27	1851.99	1896.34	1629.43	1655.16	1927.91	552.951	517.146	756.575	694.412	823.097	798.092	1022.97
Peak_01068	2.56097	214.095	656.138	460.93	278.963	384.597	439.649	93.9865	627.323	499.911	111.637	107.634	561.38	250.127	51.8236	246.961	357.685	88.5179	200	320.275	246.708	200	760.847	57.5004	387.81	775.62	103.91	59.3463	308.529	204.919	61.0958	328.763	315.93	132.669	101.346	197.228	247.471	485.461	749.693	262.553	386.133	325.41	440.008	662.786	895.091	559.185	743.693	200	518.895
Peak_01069	4.17299	214.096	10173.3	10941.2	9476.68	10165.8	10269.2	9914.14	8763.57	10436.9	4901.57	6193.69	6224.68	8371.65	6900.92	6065.84	6214.32	4535.05	5218.29	6197.57	8104.57	6873.44	9475.78	4552.16	10614.9	8389.34	7274.91	7069.75	6609.61	7376.54	6099.29	7053.87	7505.07	8130.56	10320.9	11589.2	11319.1	11404.8	10008.3	9660.55	10279.6	10251.3	5622.38	5407.81	7382.3	7264.89	6123.75	5138.18	5099.56
Peak_01070	4.1395	214.117	497.318	382.383	320.931	420.041	302.913	322.323	317.424	334.79	164.652	327.043	162.258	311.98	343.366	214.079	156.884	179.274	174.226	228.116	294.523	235.618	338.937	216.236	300.14	344.71	174.162	209.781	164.644	312.248	161.147	336.577	347.827	293.471	343.015	295.146	445.076	557.331	369.112	370.222	473.725	387.128	214.139	185.145	162.777	201.774	315.606	53.6213	103.007
Peak_01071	4.32389	214.125	133.563	193.675	112.249	217.292	237.328	117.985	95.9405	184.501	200	200	107.631	157.473	65.8191	200	87.8602	200	211.64	127.324	135.38	84.012	201.124	200	172.594	183.427	81.1503	41.8194	85.074	50.9212	200	154.308	92.8019	123.285	175.859	145.233	112.841	198.683	225.373	126.135	140.602	181.432	58.4666	200	200	203.839	105.89	60.0166	49.8049
Peak_01073	3.32882	214.164	192.838	162.328	188.182	165.006	263.274	185.8	228.613	216.451	200	200	50.4384	208.103	96.2747	200	164.773	200	197.265	208.734	218.892	183.897	237.963	152.66	215.826	201.805	114.535	200	42.1842	165.978	134.086	198.56	174.262	210.921	189.732	221.285	197.093	222.613	197.318	212.26	244.07	222.699	200	134.458	167.248	159.14	200	55.1127	92.2525
Peak_01076	0.570455	214.918	1708.13	1324.77	1658.05	1012.87	2121.53	1753.64	1360.85	1513.34	1305.01	910.238	887.653	830.851	932.797	552.664	698.136	200	1148.57	1709.47	1559.37	200	2009.21	200	1092.02	200	1221.75	1076.25	1563.52	910.023	960.908	804.717	501.149	643.07	1262.72	1553.12	1534.7	895.574	1800.06	990.83	861.491	1242.99	1633.05	1202.69	2217.88	1280.32	2004.28	1152.12	1199.1
Peak_01077	0.763696	215.015	1188.12	1661.64	1070.28	1404.42	1010.09	1460.72	1672.39	1276.28	1328.98	1286.25	1235.11	1454.23	1546.2	1654.96	1444.76	865.834	1513.29	1470.31	1482.55	739.46	1420.42	1326.58	1730.88	1802.88	1196.4	1350.45	1938.07	1450.76	1337.4	1398.08	1445.91	1864.9	1130.7	1120.19	1724.6	1229.04	1747.64	1469.76	1183.03	1628.35	1717.02	1696.05	1815.37	2131.84	2734.49	2512.35	2321.48
Peak_01078	0.713649	215.053	799.084	1068.76	901.178	954.779	1298.61	794.673	1179.99	1163.84	1345.1	1389.19	1828.15	1577.25	1007.22	1419	1606.49	603.44	1014.81	969.733	911.641	826.86	649.737	200	947.411	596.391	1104.18	1976.64	2947.61	1522.46	1303.13	1148.15	1300.48	1040.75	1192.61	782.087	1195.93	845.251	1183.59	806.869	838.614	1019.33	1611.13	1705.6	2070.12	2726.89	2105.11	1847.37	2396.8
Peak_01080	3.63932	215.072	31913.1	32026.6	26970.1	31786.5	33846.5	31440	30843.3	31661.4	22318.6	29550.5	24592.1	28817.4	27888.4	24944.2	23487.2	20093.6	17603.7	18844.6	23423.1	18776.3	29495	15948.9	30121.2	26405.5	25044.4	25554.5	25203.3	25713.7	20771.3	23797.5	25591.8	23133	27741.5	29988.9	27256.8	28281.8	32343.9	32748.5	26786.1	33711.4	22518.5	22295.6	28757.2	23972.5	22033.7	22293.4	20225.1
Peak_01083	3.24489	215.1	4565.78	4458.08	4814.79	4748.02	6981.88	4997.31	5300.96	5233.5	2434.5	2686.08	3325.37	4080.34	3837.18	3293.97	3513.39	2774	2992.67	5741.87	5254.35	3880.37	5398.64	3512.05	5473.95	3986.69	3201.37	3202.28	3370.7	3708.88	3925.24	3631.26	3270.07	4142.34	4939.12	5781.07	5032.79	5887.06	5303.15	4856.84	5342.63	6084.78	2401	2420.33	4103	2959.7	3036.97	2861.31	3828.28
Peak_01084	4.23995	215.098	750.115	794.057	819.997	914.036	1171.01	822.167	793.009	781.379	463.119	200	621.963	657.35	676.445	388.804	451.348	200	1104.32	843.318	626.602	704.29	778.238	854.497	742.334	822.29	448.557	575.099	760.749	664.566	619.825	602.331	509.324	705.149	534.232	969.209	817.61	914.001	917.53	745.666	805.761	897.645	414.461	400.367	658.23	424.579	362.238	415.015	200
Peak_01092	3.67214	216.075	4041.62	4538.55	3462.52	4234.34	5205.12	3861.02	4216.91	3915.79	2894.12	3870.1	3277.32	3881.45	3248.84	3302.73	3660.95	2453.86	2620.86	2450.61	2820.02	2298.01	3763.52	3505.82	3932.29	3291.41	3530.07	3366.52	2925.49	3206.73	2862.2	3232.74	3439.66	2855.21	3898.77	3708.37	3528.26	3951.51	4428.24	4584.85	3815.53	4619.97	3171.91	3148.55	4390.52	3423.55	2798.69	2769.95	2523.43
Peak_01093	3.32882	216.103	304.457	377.687	274.386	334.111	408.844	425.929	393.828	362.244	200	200	178.421	200	157.174	199.016	200	234.961	339.166	303.271	384.135	347.823	383.428	337.745	325.261	531.025	240.614	200	200	314.077	189.395	200	224.264	295.976	373.824	424.67	288.69	437.241	406.315	328.668	332.779	390.02	200	147.909	260.713	200	222.436	136.249	200
Peak_01096	0.54542	216.952	4240.35	3452.4	3672.5	2488.12	2439.66	3577.34	2738.28	3009.02	3086.47	2829.2	2848.48	2788.05	3025.47	2200.85	1951.83	1599.83	2134.27	2572.82	3277.55	1245.66	3960.38	1782.72	2928.59	2017.62	3290.54	3647.38	3783.19	3092.38	2461.02	2469.78	2201.32	2868.08	2841.62	3451.49	4037.92	2742.53	4293.35	2552.52	2872.59	3410.29	3973.32	3201.1	4211.48	3878.36	3946.22	3385.56	3045.58
Peak_01099	3.77045	217.083	791.857	714.465	482.082	727.546	839.738	780.194	655.617	724.979	336.104	547.154	448.931	808.443	660.108	408.029	511.468	401.952	555.44	543.989	633.702	661.669	615.503	557.605	730.192	432.838	596.353	634.216	200	538.224	546.645	580.149	613.569	736.726	630.554	626.297	671.3	699.559	725.021	626.414	725.791	828.621	364.665	350.979	646.008	483.267	476.077	474.954	432.563
Peak_01100	3.32882	217.087	200	437.358	716.197	614.012	735.845	538.798	780.764	596.075	703.246	200	929.711	1246.62	957.181	836.866	859.338	768.81	509.555	1058.26	735.371	528.51	828.212	200	655.937	200	1137.71	927.398	1409.78	1313.88	1334.28	970.686	1120.02	1019.78	733.924	864.444	903.22	731.481	609.438	707.169	639.537	826.984	878.792	740.83	937.039	847.967	727.541	833.443	984.886
Peak_01105	0.763696	217.13	382.465	200	203.948	200	200	321.996	328.076	200	362.101	375.164	426.811	554.558	340.201	200	200	200	200	200	200	200	281.284	200	200	307.056	200	681.299	584.431	478.703	349.249	342.482	487.991	631.459	200	200	342.081	297.838	200	349.655	200	354.449	431.698	445.329	612.16	464.476	455.532	523.098	200
Peak_01107	2.79196	217.543	200	889.007	758.252	1054.22	1127.31	758.286	911.037	920.334	896.544	722.685	712.357	840.332	1008.53	881.788	840.965	1028.16	754.132	1184.8	799.98	881.17	847.157	815.425	765.451	259.799	573.554	728.349	558.536	459.821	1357.98	881.78	945.078	812.472	935.429	571.522	877.64	599.47	679.308	827.518	807.165	1265.66	738.078	620.521	813.48	822.054	997.207	658.787	1318.67
Peak_01113	0.54542	218.985	2821.87	2466.79	2195.82	2337.19	1958.75	2246.09	2219.91	2104.5	2667.54	2122.56	2505.19	3283.66	2781.71	2718.72	2754.78	1550.19	2172.72	2035.01	1781.34	1391.53	2468.19	1793.48	2565.56	1714.89	3161.49	3259.86	3097.73	2953.45	2903.51	3111.77	3615.33	3482.48	2255.28	2645.09	2336.72	2496.34	2527.82	2214.39	2698.82	2670	3265.8	3272.93	3700.55	3649.32	3479.7	3287.23	2954.33
Peak_01114	0.621449	219.027	44162.4	34021.9	38621.4	33526.1	26844.7	36940.1	36934.3	38487.6	36349.2	31032.8	27954.5	28040.8	38062.7	24421.1	23480.3	14139.9	31147.4	26679.6	33355.7	20336.7	33737.3	10843.2	30397.1	20551.8	25673.6	20095.9	20737.4	28457.2	28373.8	23737.1	21248.9	23539.2	31640.8	30101.5	26026.6	32279	41321.9	27090.5	29463.8	32946.2	23901.9	18406.3	22576.5	19219.3	19752.1	21409.4	20623.2
Peak_01116	0.746939	219.097	272.147	190.712	243.455	229.823	322.532	241.713	226.163	227.537	171.706	112.967	162.377	165.067	163.927	108.622	86.0265	200	136.714	256.607	163.681	143.051	175.398	200	176.553	176.012	145.634	124.842	147.838	176.437	152.271	83.379	90.2639	116.199	292.969	548.232	265.591	300.785	303.732	451.801	300.85	448.438	168.512	294.523	159.495	133.933	123.365	185.053	131.467
Peak_01117	3.19454	219.102	946.105	697.993	750.561	447.13	1042.79	746.001	542.013	822.85	977.731	1003.69	861.978	1184.28	1078.07	1118.61	1205.64	1053.5	863.506	707.885	1133.25	768.652	988.915	1069.88	775.658	200	1069.45	1327.2	1532.92	1003.17	1288.39	963.257	949.116	1073.69	794.059	927.279	707.168	823.591	839.133	864.916	841.439	969.329	1152.7	1219.58	1830.96	1421.03	1624.77	1226.48	1955.55
Peak_01118	3.73886	219.102	528.154	679.911	1098.85	772.648	852.076	512.445	668.868	802.428	200	681.663	200	1262.36	888.401	506.579	894.674	899.799	1126.85	694.463	200	1060.46	661.856	714.219	793.454	883.946	987.806	1031.23	200	888.962	711.186	846.571	877.492	945.548	741.874	958.348	581.106	1220.34	940.761	759.141	865.984	876.723	775.832	495.61	814.937	759.097	738.519	764.785	607.928
Peak_01122	4.3741	219.175	1055.76	1064.04	1063.34	1088.27	1132.35	1112.53	1228.41	1094.97	953.485	1130.79	937.48	1367.58	1350	1167.44	1218.07	1241.03	1108.56	200	1321.57	885.362	1245.32	736.444	1003.8	959.887	1254.08	1437.79	1156.12	955.719	1031.01	1151.81	1436.53	1089.23	1040.22	1169.16	1222.79	1096.8	954.704	1217.95	1049.58	1127.4	1553.95	1184.48	1386.07	1226.33	1244.45	1394.77	1024.06
Peak_01124	0.558667	219.985	865.038	582.793	659.134	200	200	560.013	510.74	640.976	727.161	695.181	751.272	975.133	664.973	1078.23	692.056	200	645.174	498.385	368.147	580.818	624.439	200	666.504	560.315	782.013	909.052	966.554	978.338	837.481	1099.67	865.776	946.507	413.902	658.208	520.53	824.904	662.91	899.2	759.596	585.937	956.616	763.286	1279.08	1040.01	791.194	988.773	842.023
Peak_01125	0.640272	220.031	3392.89	2904.7	2357.13	2539.76	1681.82	2869.56	2756.19	2654.75	2568.21	2377.53	1849.61	1976.7	2794.65	1863.97	1752.19	635.621	1909.43	1807.75	2151.56	1133.2	2186.05	1053.27	2196.53	1447.42	1947.3	1433.44	1443.95	1933.7	1880.89	1802.02	1699.32	1796.06	2732.26	2130.2	1990.53	2565.36	2678.41	2311.48	2360.88	2207.84	1900.44	1370.37	1531.15	1573.51	1530.79	1501.19	1335.19
Peak_01126	0.847468	220.048	99.8671	114.853	14.6359	99.0671	45.604	60.2696	109.81	91.9858	135.382	107.65	37.1302	56.3095	117.277	58.6685	35.3118	200	34.9336	63.1441	200	200	200	200	86.438	200	60.0686	13.5059	200	61.8299	200	65.2114	80.3943	77.5247	72.7253	24.1022	16.4991	88.3687	63.8626	65.5185	118.931	84.0907	83.383	20.8477	96.0973	86.2676	43.1682	86.5936	3.22175
Peak_01128	1.86821	220.119	1997.06	2393.77	2076.17	2538.56	3268.19	2068.99	2471.48	2200.07	200	200	200	462.346	743.568	200	467.449	200	2132.35	3423.92	2584.95	2809.56	3131.98	2650.72	2542.83	1619.68	592.442	200	200	396.191	763.867	666.571	609.495	565.996	2413.75	2966.06	2339.32	3726.34	2105.46	2342.9	2900.25	2875.85	200	200	200	372.116	336.093	361.717	200
Peak_01130	0.558667	220.982	943.268	811.121	200	666.194	200	524.847	200	200	710.141	583.426	200	1182.8	885.888	852.303	819.676	628.065	607.239	703.98	200	200	200	453.316	743.998	644.47	914.237	882.23	878.576	1192.27	925.649	896.661	861.619	1071.42	200	673.535	814.544	868.19	798.479	676.807	711.319	693.341	812.791	773.642	1122.72	1084.86	975.359	953.104	899.738
Peak_01131	0.631247	221.031	3571.89	3021.07	2717.72	3005.44	1614.75	2991.16	3066.69	3274.46	2861.52	2361.59	2137.58	2350.23	2946.37	2086.43	1763.98	892.222	2159.12	1886.02	2615.22	1214	2539.49	1404.34	2748.02	1671.77	2356.72	1751.39	1741.32	2291.73	1733.38	2051.98	1806.77	2142.24	2862.26	2636.32	2388.9	2972.29	3176.81	2493.38	2690.91	2369.37	2148.51	1726.23	1804.1	1675.87	1634.42	1571.88	1374.13
Peak_01144	0.646968	222.028	727.404	885.759	650.608	757.791	574.548	703.308	762.079	641.054	420.654	539.411	262.665	382.887	420.6	387.758	359.088	239.605	872.498	1327.68	1244.26	1274.14	1192.18	696.042	1042.83	748.006	493.523	437.415	308.813	506.121	504.474	484.212	576.945	389.165	820.059	1302.63	597.924	1702.16	780.411	725.352	729.994	758.553	511.367	505.87	714.82	401.128	637.934	611.82	560.599
Peak_01152	3.75465	223.061	1216.1	1505.15	1175.99	1374.54	1558.76	1203.82	1316.94	1297.62	888.189	1312.31	1032.84	1296.99	1270.94	1108.91	1198.69	783.796	1054.42	980.591	744.737	718.731	1321.3	1404.16	1434.55	1382.23	1121.58	1087.34	1134.85	1100.93	906.252	1132.65	1147.83	868.161	1279.78	1228.85	1163.72	1237.01	1502.83	1388.75	1154.47	1418.22	1084.67	879.074	1289.68	979.144	957.296	979.213	938.997
Peak_01157	2.69318	223.133	897.485	593.26	781.221	814.524	999.927	792.07	839.136	824.327	1910.34	1854.64	2411.24	2902.36	2491.89	2898.75	2593.47	2000.23	200	663.077	960.228	1187.81	621.73	1049.43	851.666	557.506	2738.32	4866.4	6266.62	2366.21	2983.03	2787.94	2906.14	3295.38	916.088	1207.24	1139.51	1098.2	672.494	750.602	1034.75	1209.39	3088.11	3641.15	5214.8	3744.56	4413.02	4635.14	4636.5
Peak_01159	-0.0909927	223.207	6283.23	7262.35	6290.24	5484.44	4823.63	6766.31	7067.11	4619.26	7636.33	6959.79	6257.15	6965.02	7405.85	6789.37	6333.48	3937.03	5838.66	5497.85	5679.56	4439.65	6578.96	2509.29	7963.35	5385.08	6243.59	6723.11	5912.99	6386.05	6549.57	6693.68	7309.52	6575.3	6169.08	7024.94	7535.89	6887.72	6823.68	6356.48	4773	6971.48	6272.85	7046.24	6310.63	5904	6759.36	7962.54	5606.79
Peak_01161	0.532388	223.99	38243.4	34522.8	31465.3	33453	20650.8	34632.4	31833.6	32574.9	40241.3	35751	39127.5	50612.7	42249.8	39691.1	32119.1	20547.5	29867.5	26095.1	29998.5	17213.6	34354.1	17902.9	37793.7	24556.1	46502.9	49401	51152	50559.5	37718.7	43633.3	49051.7	56810	34038.7	32945.8	35673.1	37993	37070.5	33286.3	37976.9	41051.9	48633.1	46546.3	62167	55366.5	53864.9	52168.5	40176.8
Peak_01162	0.592674	224.032	316.985	263.854	175.719	204.691	200	145.892	177.485	130.575	130.379	158.874	40.057	151.806	228.177	150.793	109.269	127.009	194.429	229.959	235.047	147.083	134.744	200	280.312	175.748	191.76	222.93	125.098	228.035	158.035	107.794	189.51	257.966	151.456	141.928	173.244	242.521	187.185	200.054	251.286	306.761	203.59	55.2418	197.76	180.051	189.625	136.612	146.952
Peak_01163	0.654009	224.035	435.129	192.352	233.059	307.452	200	355.79	276.106	190.151	372.907	217.345	283.898	373.838	383.193	373.405	269.814	264.542	262.67	156.868	200.01	213.132	304.348	200	209.143	280.048	463.052	455.102	355.569	403.23	438.05	436.953	505.976	448.291	252.206	261.729	245.379	359.928	253.734	274.252	356.258	445.202	417.755	343.265	707.186	447.507	551.538	423.941	440.604
Peak_01164	3.21132	224.061	200	200	200	518.682	454.645	507.734	467.669	471.797	450.476	812.899	642.426	572.235	853.002	860.413	200	615.674	200	482.591	348.245	200	310.257	200	200	327.827	607.958	925.209	200	609.125	568.136	770.276	800.324	200	514.031	462.977	490.815	372.535	631	522.282	270.682	404.395	1068.92	683.004	541.937	200	645.354	683.654	1292.97
Peak_01167	-0.00410521	224.21	968.441	1190	614.632	899.226	827.81	1275.64	1052	849.539	1143.89	978.815	1073.14	997.241	908.711	1134.6	200	200	777.044	1209.76	961.502	200	1007.2	200	200	200	947.136	1126.43	200	1012.57	1109.74	751.153	823.977	857.483	843.765	808.66	1370.97	961	1302.12	1087.82	200	968.574	1192.04	1067.75	1161.29	854.191	1008.76	1115.71	200
Peak_01169	0.532388	224.992	11732.4	10552.5	10926.6	10708.4	5906.35	11061.3	9574.18	10530.6	13567.2	11571.9	13099.5	15919.5	14412.8	12120.2	10354.5	7111.61	9565.53	8178.79	9897.03	5656.13	11668.8	5743.5	11873.3	7989.45	14418.9	16271.4	17077.7	16275.1	12314	13231.3	14763.6	18380.9	10021.4	11110.4	10913.7	12152	12499.5	10351.9	11976.3	13812.4	15215.5	13274.1	18951.6	17215.9	16774	16133.3	13724.9
Peak_01170	0.697057	225.014	329.734	406.017	294.745	367.989	66.299	344.89	352.44	305.107	706.44	327.704	598.46	502.685	531.027	653.472	336.707	177.98	243.619	305.181	178.359	225.976	447.77	192.066	486.32	252.53	665.325	837.495	853.026	591.411	510.933	676.223	1030.63	728.317	432.775	460.724	333.771	368.364	385.946	452.42	476.428	561.954	819.246	645.667	676.591	1014.1	731.485	559.836	527.767
Peak_01176	3.00904	225.15	2695.69	2432.39	2770.32	2397.65	3684.81	2572.14	2618.29	2983.57	7209.26	6062.7	8867.35	9875.36	8478.65	8568.56	9644.03	6385	1847.12	1919.6	2325.23	1476.89	2358.5	2245.95	2503.98	1285.3	11170.3	9930.42	10696.2	9145.08	9798.9	9093.07	11751.8	11638.8	2549.25	3004.69	4041.89	2980.89	2244.15	2303.17	3123.77	3373.76	9855.84	13715.3	19064.4	14065.2	14379	12600.5	14472.8
Peak_01178	4.84461	225.197	2400.79	2304.33	1720.84	2545.44	2949.96	2420.73	2487.82	2645.41	1977.82	2742.44	2291.73	2710.54	2456.74	2182.98	1930.83	1924.76	3021.35	1269.36	2352.92	1517.11	2439.43	2469.62	2555.52	2026.49	2265.5	2342.4	2493.53	2403.65	2456.59	2191.46	2033.15	1884.67	2267.61	2860.96	2572.63	2105.16	2497.84	2266.51	1992.73	2654.82	2199.49	1999.21	2510.15	2278.25	2364.14	2589.88	2587.2
Peak_01182	0.532388	225.989	11419	9192.26	10845.4	9465.98	6050.5	9930.88	8696.45	9948.71	12817.6	10567.8	12471.8	15570	13571.9	11254.3	10145.5	7738.21	10064.2	8708.71	10073.1	6788.85	12206.2	3416.84	10410.2	7513.49	13311	14805.7	15442.9	15140.2	13700.9	12992.6	13941.7	16843.3	9001.53	9731.69	9823.26	11064.4	11273.1	9635.28	10910.1	13072.7	13755	11438.3	18902.8	15515.5	15183.6	15961.7	15194.8
Peak_01183	3.00904	226.153	200	200	438.742	253.653	389.553	200	200	379.038	1066.6	880.813	1462.67	1413.99	1433.57	1259.44	1404.54	984.747	200	200	200	181.957	200	200	200	200	1403.55	1465.33	1431.93	1252.25	1619.96	1305.21	1346.83	1682.12	200	200	336.626	200	200	200	464.162	465.673	1310.92	1697.21	3214.17	1883.35	2001.81	2017.55	2100.82
Peak_01184	7.36822	226.181	6919.74	1816.93	1661.76	6117.69	777.177	4564.29	3457.45	2759.92	1988.33	1820.49	200	200	2569.11	1404.41	4265.07	2683.75	777.954	414.326	200	200	654.7	3743.35	968.409	920.023	657.823	972.017	200	200	200	435.721	200	763.928	2600.05	4442.39	1131.49	795.911	2905.43	4118.04	1473.75	200	2651.29	929.552	1456.3	1050.58	970.38	612.905	4766.88
Peak_01188	2.77572	226.548	1051.62	1029.84	931.505	943.154	1588.33	1239.61	914.039	1082.02	1033.63	1118.53	975.591	926.267	1415.15	961.359	928.532	1710.64	890.206	978.27	1024.81	964.724	846.437	1616.47	1135.35	791.129	861.009	1007.41	820.486	1221.44	935.008	975.969	905.547	710.174	1048.81	1199.3	1056.21	792.334	1245.42	914.875	788.583	1304.67	880.012	722.292	1068.58	724.25	1107.36	1030.81	1290.65
Peak_01191	9.9651	226.953	267.566	200	200	359.677	915.983	200	883.649	1049.77	669.808	680.341	861.355	231.374	200	1166.05	571.226	3143.93	200	844.495	200	1164.35	389.002	613.825	200	200	200	200	200	712.797	985.996	1092.76	830.954	1324.3	810.599	567.622	924.801	200	1077.36	947.815	724.68	1058.32	468.448	200	200	562.82	200	1779.5	1124.71
Peak_01192	10.7335	226.954	45002.8	43932.7	49457	44282.4	41987.4	41431.6	43319.6	48746.4	39403.8	38428.5	44585	43781.6	41235.6	43693.8	46006	30670.5	51537.2	39245.9	47568	43833.7	40328.3	35415.1	40012.2	39727.3	43321.2	49131.8	52326	50119	53162.5	43645.4	45462.8	43482.1	39092.9	46401.3	48066.5	47127.1	49320.1	44458.1	36266	42965.6	38248.6	40641	55208.8	39942	44787.2	45824.6	34997.6
Peak_01193	0.54542	226.99	2015.69	1704.33	1701.41	1409.8	1095.47	1672.78	1435.51	1520.4	2394.09	1662.66	2049.91	2757.28	2300.47	1771.88	2034.14	1271.53	1541.7	1394.19	1676.05	1465.37	1707.55	996.279	1932.88	1072.77	2403.48	2639.44	2604.96	2315.07	2390.99	2277.16	2466.71	2984.23	1816.62	1955.49	1712.36	2048.84	2050.33	1751.36	2097.89	2317.49	2666.53	2237.83	3276.11	2649.6	2763	2410.34	2455.77
Peak_01194	11.0377	226.98	1142.88	1209.22	956.163	1380.97	1073.24	1118.37	1326.33	1285.69	1058.14	1268.93	1070.87	1188.37	1023.58	1378.14	1088.85	882.317	1010.41	682.823	1090.51	200	745.831	1020.32	1065.72	837.819	1554.02	1301.22	1237.77	1090.83	960.873	1589.2	1361.39	1217.93	1154.3	1268.03	1071.88	1578.03	1361.27	1315.75	1144.68	1134.65	1136.98	1308.72	1102.87	1224.65	1283.3	1015.87	733.143
Peak_01197	3.31204	227.071	1119.72	1047.28	949.654	999.32	1060.64	995.309	1016.24	1105.65	546.827	878.291	812.352	825.006	971.831	739.28	1077.64	964.993	605.746	986.15	1305.14	1400.38	889.561	834.321	947.206	842.901	868.176	1037.12	855.549	1120.5	917.622	903.892	726.166	879.922	850.175	1133.53	901.596	970.072	1115	656.684	953.249	811.751	865.768	675.484	979.041	904.739	1071.25	926.304	1173.78
Peak_01198	3.68889	227.072	9701.02	10603.8	8559.23	9926.71	10300.1	9739.54	9891.71	9313.35	7247.33	9673.42	7711.25	8925.02	8923.23	7561.55	7673.04	6597.79	6034.58	6064.71	7588.89	6026.36	9698.16	4938.86	9170.81	8786.97	8431.14	7901.71	7912.51	7637.88	6326.15	7952.24	8420.83	6727.4	8128.2	9098.49	7739.38	9015.24	10334.6	10336.8	9159.42	10607.2	7043.52	6586.61	8762.22	7574.41	7084.74	7062.51	6343.5
Peak_01201	2.92523	227.129	7748.27	7821.36	5998.85	7052.02	10600.5	6791.23	6384.09	8519.55	3027.02	3079.79	3331.87	4572.58	3298.79	3375.82	3720.42	2397.94	7031.62	7458.03	7056.93	7040.35	11321.2	5720.94	7757.43	8381.39	3510.95	3310.87	2810.11	3633.42	3748.61	3591.06	4595.04	4131.83	12247	11171.4	7503.48	10493.8	10555.4	9230.62	8349.75	12607.7	1844.93	2716.76	4568.3	3876.23	2784.71	2995.16	4372.8
Peak_01202	4.55928	227.127	23642	23285.6	14641.2	33765.3	21192.9	22028	4284.77	22247.1	16930	24899.2	18591.6	48331.2	25882.9	17774.5	17580.2	13608.4	9699.19	13343.3	22448.7	10414.2	18492.9	21485.9	19675.6	17503.2	21893.6	22051.3	21564.3	16654	21095	21853.7	18407.9	20602.6	16630.1	21805.5	19161.1	17428.5	46241	26779.6	17182	17086.8	23292.8	21763.1	29623.7	19515	21850.3	20364.4	17111
Peak_01203	2.94198	227.143	945.708	872.555	476.378	915.026	612.767	529.778	647.932	993.379	232.782	254.462	231.962	439.416	172.279	172.755	209.192	268.237	351.366	464.428	628.523	403.965	1055.25	814.533	897.079	792.757	367.844	252.762	185.687	279.997	196.284	331.088	423.512	384.437	1464.44	1052.57	501.46	1258.44	1058.02	1061.65	1065.63	1336.78	152.489	196.839	251.004	281	259.959	244.474	267.411
Peak_01204	3.02582	227.164	1330.32	951.53	1246.54	1032.54	1454.9	995.717	1074.85	1367.46	2645.3	2890.65	3229.49	4452.34	3208.93	3518.8	3875.77	1911.01	377.124	775.755	1147.87	542.727	1077.15	644.449	1033.77	743.181	5043.65	4298.51	4788.38	4898.4	3973.71	4141.69	4942.1	5546.34	1424.47	1587.62	2027.47	1431.84	1170.43	1177.04	1660.09	2111.45	3319	4872.36	6224.39	5553.38	4615.8	4731.51	4643.71
Peak_01206	4.59288	227.167	153.654	157.518	200	343.683	193.653	157.33	200	141.204	200	198.781	129.972	415.607	179.944	110.762	76.7046	200	112.234	200	126.096	200	91.5473	120.758	99.4328	168.998	147.867	118.518	125.918	191.139	87.4705	129.763	144.964	107.754	73.2768	252.359	100.34	129.027	418.761	198.568	160.511	138.487	164.62	217.308	221.044	116.249	143.38	200	100.038
Peak_01210	-0.0909927	227.238	2756.49	2538.05	2993.05	1879.45	2646.2	2987.96	2842.79	2037.84	3389.14	2671.06	2971.06	3713.67	3345	2654.47	2901.83	2860.37	3047	2999.26	2778.66	3004.84	3207.42	1414.61	3607.28	2083.11	2897.54	3024.02	2243.94	3111.55	4166.54	2467.69	3216.48	3667.02	1462.64	3342.22	2889.92	2918.92	2852.42	3812.88	1967.13	2897.47	2626.48	2519.88	3716.16	2978.04	3051.66	2845.44	2904.66
Peak_01214	0.558667	227.987	843.922	618.919	595.561	523.509	200	581.922	622.263	693.122	886.005	686.592	810.301	1058.86	984.707	751.61	888.04	657.129	657.534	612.762	623.211	469.131	761.661	200	681.831	714.418	1061.95	1037.81	894.429	953.004	911.543	896.689	908.153	1205.96	811.574	594.24	872.088	851.728	856.301	650.797	900.153	809.353	1195.52	1082.99	1271.8	1125.98	1225.51	1082.2	862.78
Peak_01215	3.73886	228.074	1275.07	1488.24	1000.2	1346.06	1616.25	1233.41	1400.83	1268.79	914.043	1217.96	1018.16	1198.63	1108.63	1143.36	1041.32	1098.46	1270.61	1160.62	757.334	1279.23	1432.3	1483.59	1199.22	1137.14	1308.79	1051.48	954.069	937.711	901.911	1144	1112.91	948.912	1236.77	1349.61	1054.39	1161.98	1289.94	1563.54	1287.44	1646.1	1075.45	930.285	1147.04	1087.99	861.007	937.05	869.821
Peak_01216	4.57608	228.13	2586.64	2552.86	1353.15	3422.05	2663.22	2089.28	467.883	2109.72	1784.99	2481.34	2013.26	5003.88	2507.68	1782.87	1913.94	1479.4	1943.8	1285.6	2072.94	1899.71	2022.24	2147.21	2243.5	1490.38	2653.93	2315.52	2036.35	1731.26	2399.91	2181.49	1985.08	2124.37	1730.76	2419.42	2047.37	2143.99	4762.39	3109.24	1871.97	1741.96	2612.98	2384.28	3459.29	2157.31	2280.08	2059.16	1939.11
Peak_01217	2.94198	228.132	1193.26	1005.64	790.251	948.664	1400.63	959.884	747.305	1220.23	200	200	588.953	579.658	200	347.514	463.347	200	1443.42	988.367	942.199	1263.05	1571.96	1441.31	984.254	1059.92	200	200	200	200	385.958	364.179	575.295	463.748	1416.89	1388.84	989.994	1292.75	1366.71	1234.64	1115.97	1430.53	200	200	200	505.744	200	200	557.987
Peak_01219	4.72698	228.196	2100.98	1163.99	1170.23	1475.68	1324.1	1622.2	1534.36	1384.4	1488	1100.17	1271.34	898.75	1544.83	794.608	1238.71	1037.6	935.252	881.227	955.784	886.842	970.403	996.338	891.465	796.848	850.621	937.175	1194.78	901.794	1247.71	842.109	717.997	844.317	1305.36	1816.52	1135.03	1028.05	1634.56	1285.15	967.236	1144.25	1572.43	854.78	1829.32	897.957	926.957	911.132	1986.75
Peak_01227	3.78724	229.049	404.948	404.219	479.804	404.845	428.443	480.381	395.148	305.766	329.918	418.385	269.65	385.944	355.863	401.419	297.683	200	310.01	200	200	200	314.675	495.439	467.223	365.053	627.835	286.391	200	373.407	194.875	200	334.843	219.882	399.129	554.113	320.641	451.086	353.576	378.39	546.151	477.965	330.724	233.54	579.207	264.278	244.069	285.318	200
Peak_01230	3.34556	229.087	2038.41	2051.28	2070.85	2110.23	2665.82	2102.91	2246.54	2326.47	1135.13	1371.57	1715.97	1650.16	1438.25	1183	1500.25	1130.83	2242.53	1950.73	1921	1453.32	2297.32	1921.2	1832.58	1438	1541.4	1599.33	1585.09	1798.05	1759.62	1726.9	1735.21	2145.1	1691.39	2435.69	2249.29	2175.67	1971.45	1904.62	2185.09	2863.64	992.535	1079.67	1864.14	1362.86	1041.74	1475.1	1534.81
Peak_01231	4.18974	229.087	411.469	593.356	673.655	625.152	652.388	623.4	455.555	648.527	200	200	200	442.628	365.83	550.911	200	200	502.729	309.799	714.967	669.71	676.597	587.729	488.244	438.528	431.543	301.418	200	329.417	496.262	433.775	499.64	483.343	492.426	531.723	910.5	474.632	442.148	539.666	200	808.447	271.421	200	658.626	200	247.009	200	283.551
Peak_01234	2.99224	229.144	1239.5	1189.18	774.802	899.537	1273.76	992.023	883.851	1064.33	638.171	200	431.188	594.194	638.872	665.299	532.453	200	1798.05	965.015	791.42	1449.63	1552.09	1306.92	882.15	1024.01	645.081	702.719	515.265	625.187	660.705	375.265	746.747	688.983	1499.27	1310.72	721.208	1122.97	1224.14	989.8	1058.31	1238.79	200	568.848	746.674	629.398	454.296	429.915	895.407
Peak_01236	0.847468	229.155	2143.04	1820.17	1043.67	1291.96	978.829	1667.75	1781.38	1276.45	468.583	656.525	512.538	200.129	200	303.122	565.643	200	1570.49	1595.5	1426.22	1505.5	1534.87	829.971	1606.35	1299.38	454.093	200	273.703	473.784	200	280.371	596.75	307.63	1271.66	1315.29	996.855	1862.57	894.887	1297.31	1238.73	969.964	200	200	391.918	200	200	200	98.7447
Peak_01242	3.97175	230.053	933.047	1211.22	771.122	1012.38	1294.3	808.846	845.099	961.177	665.719	841.32	200	935.992	200	659.808	552.057	965.348	1042.59	1106.68	1145.26	1466.98	805.185	888.183	1078.38	200	775.688	870.889	874.464	699.547	643.728	736.758	623.279	200	778.884	1125.54	788.051	1030.89	1229.2	1138.43	780.326	1307.4	778.463	741.15	912.071	711.934	431.707	200	200
Peak_01248	0.746939	230.992	17402.2	22073.4	16229.6	16304.3	12468	18883.2	22398.5	15635.9	13481	14026	14887.7	17649.7	18134.3	19542.8	18731.3	9543.92	16494.2	14988.2	16735.7	10860	20242.6	7933.67	21316.1	20180.4	13936.1	14501	17016.2	16613.6	14510.1	18828.3	17491.9	18720.3	12825.8	13191.8	13229.9	17912.7	19796.6	19396.6	17846.7	20683.4	16261.2	14649.5	21705.2	17392.3	25894.4	24505.8	16116.1
Peak_01249	0.684884	231.028	25126.7	28077.6	28774.7	26019.1	20188.4	23452.9	33096.2	25135.7	34235.6	36780.1	33589	33478.2	35624.1	29450	27540.4	19597.8	22775.8	23043.9	27487.5	16732.1	27002.8	9095.4	23904.6	16023.5	24690.9	25021.9	24287	33122.1	31829	29598.8	26651.1	29423	18670.3	22246.5	22658.2	22726.7	27377.1	23741.6	24515.1	26952	25066.3	21171.2	29615.3	26299.8	25920.8	30324.7	24476
Peak_01250	4.1395	231.067	33886.7	38679.5	32022.8	36223.9	36875.5	35194.1	34480.8	36191.5	24099.2	27475.8	25869.4	33324.2	30632.8	27897.6	27822.2	20065	17826.1	19896	28414.5	23746.6	37049.2	16920.5	37734.2	31105	29427.8	30441.7	26841	27392.1	29766.7	29693.7	30934.2	32213.1	34748.5	39027.2	39727	34862.8	36595.7	34939	32898	39927.1	24724.4	24557.1	32421.4	32064.8	27569.1	23492.1	23966.6
Peak_01252	0.746939	231.097	230.805	221.783	396.398	71.436	369.199	258.934	268.655	178.423	334.803	219.287	198.004	298.002	265.882	267.15	203.097	200	288.847	474.75	313.23	220.814	191.286	200	256.89	313.179	227.636	223.381	175.387	305.396	348.402	223.587	241.34	289.797	249.924	163.589	348.732	362.668	348.103	171.878	320.826	281.026	238.033	186.109	318.733	243.771	253.916	286.762	85.6815
Peak_01253	4.23995	231.116	368.399	328.653	286.04	355.214	406.041	303.766	387.941	415.146	168.539	203.354	248.718	365.378	217.953	205.274	386.912	264.71	304.163	226.039	267.456	347.69	380.865	255.215	359.69	276.537	234.796	294.041	321.857	212.357	270.386	321.651	273.479	323.301	432.596	368.927	334.413	421.816	334.952	362.335	365.41	440.58	268.714	257.616	364.28	293.929	301.499	203.601	254.451
Peak_01254	4.42465	231.112	185.373	190.866	147.835	268.908	284.932	173.816	332.679	287.548	157.763	51.3419	111.859	235.266	90.8522	92.8962	91.9405	190.502	147.473	115.81	244.579	190.95	227.366	134.512	185.474	140.614	104.315	93.2894	156.192	49.0272	51.394	107.27	130.12	138.463	211.374	254.357	159.744	206.368	142.424	246.917	280.68	266.448	101.964	166.738	123.407	135.496	105.635	122.336	121.642
Peak_01255	3.46257	231.207	406.102	605.7	200	200	676.797	537.942	700.668	200	461.88	655.547	200	590.771	637.164	518.438	653.869	955.082	200	598.815	356.579	200	509.077	616.797	507.68	200	488.182	425.475	350.429	392.586	482.747	570.528	437.493	404.587	554.064	763.483	200	452.732	463.685	386.116	545.762	671.5	507.66	507.023	638.93	439.339	603.703	514.926	524.994
Peak_01256	0.763696	231.995	1102.42	1331.45	949.644	951.852	1332.37	1088.53	1429.1	1097.35	891.412	793.491	1011.8	959.007	929.016	1198.9	1078.26	553.253	1309.06	1460.18	887.851	944.085	1065.24	698.312	1421.48	1320.8	1015.45	805.738	936.111	931.917	935.938	1321.97	1021.67	1168.92	823.438	889.2	799.053	1100.16	1158.03	1184.97	1032.36	1280.4	1057.09	741.458	1365.31	1232.76	1604.19	1393.56	950.036
Peak_01257	0.640272	232.033	2048.95	2572.86	2234.74	2240.26	1311.34	1744.39	2678.17	2070.87	2549.68	3022.73	2872.05	2934.21	2947.3	2277.66	2140.13	1430.2	1721.24	1548.57	2168.77	1186.5	2184.6	1005.78	2121.94	1189.09	2372.52	2235.97	1935.89	2829.09	2301.28	2328.48	2155.97	2671.16	1491.75	2053.94	2051.74	2172.82	2450.98	2019.39	2170.11	2258.97	2174.2	1872.23	2407.72	2243.78	2037.4	2368.06	1698.71
Peak_01258	3.17775	232.051	2866.62	4700.6	2682	4367.8	4142.71	3828.91	4206.53	2917	4118.21	5616.55	4305.06	4117.18	4769.47	4963.4	4959.99	3342.56	2722.08	3589.85	3594.29	2509.79	3663.51	3191.15	3443.64	2858.97	4738.28	4871.97	3407.73	4811.65	3743.16	5333.88	4497.01	3563.77	3839.32	4265.29	3901.59	3235.21	4214.51	3659.08	2949	3518.42	6415.43	5444.33	5401.05	4967.93	5714.79	4161.64	4822.7
Peak_01259	4.17299	232.07	4328.31	4694.65	3851.07	5043.83	5882.45	4277.08	4635.96	4584.56	3231.14	3619	3442.57	4739.34	3874.14	3591.66	3830.74	2627.55	3243.26	2598.05	3496.6	3257.24	4854.57	2379.54	5188.32	3716.35	4043.39	3886.31	3361.07	3613.7	4245.67	4149.72	4453.74	4107.04	4741.41	5266.21	4746.58	5176.46	4644.58	4919.16	4656.38	5637.11	3724.27	3361.99	4878.45	4202.67	3830.87	3392.87	3277.91
Peak_01262	3.2281	232.552	593.342	725.755	600.592	1008.6	1006.92	1018.46	980.525	673.856	1102.87	1501.97	1079.27	1086.25	1294.7	1166.13	1133.96	1464.75	723.216	1223.94	871.701	696.952	782.818	1134.53	575.785	1098.82	1100.58	1055.67	836.986	1069.72	1014.07	1173.53	1150.94	646.806	820.14	831.332	904.014	877.267	723.361	858.857	493.347	896.47	1256.31	1003.59	1118.96	1264.52	1236.26	1161.03	1140.8
Peak_01265	0.763696	232.99	1161.41	1629.21	1030.8	1396.26	1128.69	1312.56	1620.29	1076.68	1023.22	886.279	1141.83	1390.35	1100.3	1419.12	1542.34	658.338	1222.5	1208.24	1121.7	678.026	1506.3	835.966	1746.51	1399.99	1127.35	881.568	1211.31	1197.64	1257.93	1447.08	1373.88	1537.3	993.526	1012.24	890.751	1693.17	1357.54	1632.99	1558.29	1606.15	1322	1091.72	1588.86	1462.17	1917.26	1683.75	1155.82
Peak_01266	0.646968	233.028	2088.37	2514.3	2393.26	2330.92	1440.26	2113.73	2660.76	2219.6	2883.43	2907.84	2549.59	2730.71	2826.13	2436.96	2190.52	1261.93	1500.78	1560.6	2270.34	1246.24	1990.98	1095.42	2107.33	1197.9	2110.63	2003.71	2065.24	2579.83	2113.07	2523.95	1993.23	2580.02	1582.04	1734.53	1936.22	1835.17	2169.87	2045.22	1974.39	2019.04	2120.82	1977.42	2459.15	2249.1	1958.49	2515.24	1817.73
Peak_01267	3.21132	233.057	451.516	297.907	263.717	261.99	344.629	229.334	357.759	425.071	161.112	432.646	350.176	345.899	481.024	325.154	343.733	200	200	382.849	360.15	200	262.945	328.132	304.576	96.5268	342.928	239.235	171.369	215.716	339.202	322.329	209.001	277.295	265.305	290.278	172.439	349.347	314.006	235.738	248.626	212.727	267.644	244.806	358.749	306.114	183.234	237.596	404.506
Peak_01269	0.646968	233.058	252.46	319.95	332.079	421.393	671.005	244.756	629.882	349.171	321.772	197.543	291.94	376.816	237.067	245.926	296.273	25.9895	157.507	333.694	186.304	171.127	237.251	200	218.947	158.192	365.105	438.924	282.226	325.938	324.566	290.617	294.525	335.879	189.507	334.715	438.464	472.326	349.511	383.967	328.883	499.549	314.553	303.178	376.213	332.071	171.426	315.212	267.114
Peak_01271	4.23995	233.078	1075.59	1390.93	1243.46	1255.73	1335.47	1146.68	1169.42	1293.9	793.948	809.843	961.153	1347.54	1190.01	925.55	1074.19	598.192	692.185	1058.62	1009.03	1022.22	1213.71	1395.08	1210.8	1251.57	1069.71	1064.3	878.495	1028.13	1020.08	1080.43	922.851	1060.27	1158.75	1389.19	1320.77	1076.53	1188.11	1196.57	934.089	1140.14	845.156	889.092	1122.63	1099.54	1041.41	976.85	890.454
Peak_01273	3.70564	233.082	3188.06	3865.5	2811.42	3305.51	3952.78	3118.23	3168.35	3094.95	2423.24	3589.9	2754.15	3121.37	3166.33	2548.75	2693.91	2169.99	2008.74	1961.61	2592.92	1801.51	3116.91	3505.15	3206.02	3082.78	2945.67	2748.67	2839.69	2642.57	2423.55	2686	2944.41	2546.2	2828.91	3055.04	2600.77	3071.28	3278.05	3302.59	2813.16	3567.31	2376.9	2168.56	2945.37	2217.36	2514.95	2272.83	2086.24
Peak_01284	0.697057	235.024	325.944	486.082	422.89	506.719	257.76	461.612	330.544	407.888	312.301	231.697	287.729	376.92	287.536	267.979	238.708	200	504.033	636.033	498.929	500.149	523.921	200	415.205	385.593	231.22	260.793	259.232	405.91	231.987	268.351	267.015	333.489	301.617	521.009	531.146	425.128	519.81	389.458	328.017	498.912	195.789	184.411	204.683	225.613	285.038	246.731	211.773
Peak_01289	5.51856	235.131	1272.63	200	430.848	653.728	756.704	567.163	472.34	753.097	200	324.946	633.805	403.071	891.374	656.139	623.027	571.846	893.925	331.789	496.255	395.249	698.636	582.417	200	434.192	200	551.691	711.621	200	200	200	295.545	200	584.588	546.41	200	200	391.934	414.588	200	200	525.704	200	531.084	200	654.095	200	685.423
Peak_01294	3.65573	236.114	1173.67	617.994	360.461	1358.54	1175.64	687.71	200	731.356	392.808	837.821	517.112	1434.37	798.292	542.418	580.311	1083.58	200	200	200	531.205	464.566	200	528.04	566.649	635.28	200	255.667	282.139	200	760.521	626.794	391.769	743.761	723.056	576.092	613.262	1940.44	990.072	541.067	703.642	737.655	634.636	1194.48	608.185	678.64	670.103	200
Peak_01297	0.621449	236.906	1877.78	2503.73	1818.76	2152.92	1450.59	2479.19	2208.71	2456.57	1754.34	2170.07	2013.88	1881.59	2471.32	2160.36	1829.11	1527.39	1779.66	1825.95	1848.86	1793.17	2539.54	1460.27	2101.19	2075	1196.6	1321.09	1349.87	1783.1	1496.46	1961.75	2252.17	1726.81	1482.1	1668.58	1458.08	2004.15	2012.4	2437.23	1983.99	1991.34	1477.43	993.376	1449.22	1181.8	1642.16	1520.89	1442.5
Peak_01301	2.79196	237.113	2525.83	1898	2149.11	2325.47	3060.83	2088.29	2258.42	2262.3	2389.09	2463.26	2464.59	2534.71	3468.25	2396.74	2700.89	2053.52	1515.4	2182.69	2407.77	1819.07	2620.48	1397.02	2153.95	1892.05	2604.18	2098.84	1816.42	2221.3	3072.41	2376.01	2347.88	2630.04	2223.99	1942.55	1762.32	2156.76	2145.04	2012.31	2286.35	2258.73	1937.13	1706.87	2595.27	1903.21	2287.57	2562.21	2621.38
Peak_01304	-0.0909927	237.186	3023.99	3074.5	2699.01	2149.16	1778.72	3224.27	2556.56	2134.82	3117.69	2903.08	2780.85	2575.34	3266.23	2575.47	2739.8	2463.84	2276.82	2685.46	2095.56	1711.01	2908.85	1982.57	3297.61	2663.05	3250.92	2807.88	2384.65	2973.86	2673.55	3037.63	3010.13	2796.71	2652.94	2656.21	3230.53	2847.78	3204.71	2788.29	2256.58	2742.7	3289.65	2568.34	3039.37	2518.63	2326.9	2652.85	2019.26
Peak_01305	-0.0909927	237.223	7168.56	8392.64	7884.36	6051.26	6416.91	8675.75	7728.98	5584.79	9003.19	8322.68	7744.23	8164.36	8750.27	7433.19	6935.53	4862.23	6949.5	7086.22	6905.19	5730.16	8341.9	2995.01	9112.68	6529.13	7640.41	7807.91	6545.08	8201.53	8665.51	7508.1	8913.73	8250.68	6921.92	7792.68	7560.36	7896.36	8352.45	8468.32	6915.36	8387.12	7960.32	7411.69	8113.71	7591.19	7638.96	8049.91	7056.01
Peak_01311	-0.0909927	238.225	1502.4	1207.55	1318.55	1135.83	1237.23	1607.15	1402.54	1333.51	1097.95	1428.02	1104.55	1344.25	1472.44	1515.49	1363.56	1398.81	1244.01	1125.05	1023	1348.86	1456.57	874.239	1626.39	1422.46	1300.44	1385.61	1515.76	1197.82	1277.93	1328.15	1548.47	1173.65	1313.14	1448.81	1707.62	1363.85	1440.61	1587.4	834.697	1449.11	1390.87	1637.29	1924.42	1197.04	1278.48	1442.42	1189.7
Peak_01317	-0.0909927	239.15	4161.82	4607.45	4268.99	3150.04	4064.01	5053.98	4200.92	2918.23	4880.13	4438.69	3971.03	4544.51	4593.41	4048.27	4352.12	2112.46	3548.6	3987.55	3147.44	3967.42	4142.79	2215.9	5021.26	3198.09	4113.29	4183.72	3231.74	4196.63	4695.37	4290.74	4587.58	4480.12	4150.4	3866.37	4341.65	4414.13	4558.44	4366.38	3144.34	4541.6	4372.59	4407.63	4919.24	3919.04	4277.56	4493.92	3053.02
Peak_01329	0.532388	239.968	10771.7	8658.22	10678.2	6607.05	7137.46	10029.9	7676.3	8729.65	8264.37	6602.63	8038.03	7695.41	8433.21	6500.8	5371.49	3712.63	7539.15	7156.25	9690.66	3988.23	10526.8	5501.99	7122.62	4313.8	8869.67	9380.06	11466.5	8059.08	8573.75	6025.23	6691.66	7683.16	7497.26	8375.69	9101.45	7580.17	9822.8	6167.88	7942.79	9225	10103.8	8745.17	13883.1	9838.38	12646.3	9630.32	9456.15
Peak_01339	0.558667	240.969	1635.79	1503.85	1546.72	1087.08	1683.12	1458.54	1322.77	1490.21	1538.58	1071.32	1125.01	1336.69	1236.85	1036.58	1029.43	902.158	1196.26	1152.09	1525.93	1011.02	1573.07	869.405	1206.33	676.678	1618.2	1553.52	1726.5	1338.91	1074.83	1105.9	1215.05	1302.54	1252.84	1403.3	1549.42	1250.82	1934.46	1332.51	1493.4	1578.63	1863.8	1534.05	2345.84	1879.39	2071.7	1456.16	1472.77
Peak_01343	3.09097	241.055	1563.62	2416.49	1586.56	1606.91	2224.28	1973.49	1986.2	1985.97	928.623	1196.58	888.125	1234.89	1281.71	1189.83	1267.82	1143.51	1471.2	1913.63	2102.87	1540.47	2146.1	1456.42	2040.76	1636.59	1240.82	916.064	900.156	1166.67	952.26	1304.02	1093.34	1120.96	1833.17	1850.63	1726.7	1804.71	2040.9	1975.98	1797.65	1823.84	892.629	794.543	1483.77	1154.93	843.142	780.302	1167.96
Peak_01344	3.61079	241.07	9638.59	7014.99	4595.35	12303.7	7728.72	7096.02	3572.97	6579.17	5055.43	8502.04	5201.77	13027.2	7045.24	5623.35	5118.14	5797.13	3580.98	3319.02	4827.46	3624.35	5181.71	7928.52	6534	4300.36	6062.46	4451.03	3859.26	5115.74	4760.51	6342.53	5814.13	4690.62	7081.11	6423.13	6630.16	6018.17	18358.2	8216.34	5811	6660.97	6468.8	6119.93	9150.55	6190.38	5528.21	6696.48	3671.2
Peak_01345	3.9885	241.086	5327.67	5461.08	5182.16	5598.03	6603.55	4529.82	3407.61	5904.34	2226.65	2671.63	2634.98	3440.61	1686.02	2187.03	1860.72	1501.25	2761.4	3196.94	5391.58	4026.28	5089.79	4372.23	4185.76	4615.46	3202.31	3470.65	3477.45	3392.09	2537.27	2488.84	2218.07	3534.85	4764.91	6035.56	5581.54	6065.35	5333.3	5106.85	4813.44	6419.35	2118.58	1734.49	2907.04	2985.39	1473.97	1377.83	2036.82
Peak_01353	0.897183	241.155	1219.76	1310.1	788.378	1160.58	1060.89	977.218	1250.61	1160.38	366.143	452.765	200	200	200	200	200	200	851.692	1204.97	1122.08	849.672	1159.6	705.901	1211.89	997.755	380.329	200	287.542	280.972	207.226	290.482	178.955	453.667	906.911	1136.81	641.537	1193.77	733.325	960.371	905.772	860.053	200	122.016	204.373	200	200	200	200
Peak_01358	0.558667	241.965	1449.78	1242.21	1317.49	920.973	911.704	1545.41	1161.23	1465.13	1164.24	823.525	1100.42	988.791	1327.46	931.869	676.485	556.839	886.038	896.749	1285.63	200	1530.46	674.243	1271.94	1047.95	1459.25	1525	1706.14	1189.86	1215.06	998.917	861.075	1272.63	1211.53	1305.85	1437.13	1194.98	1412.52	1109.4	1215.76	1386.65	1797.23	1390.68	2187.03	1806.99	2033.52	1553.42	1188.59
Peak_01359	0.532388	242.001	18442.3	15646.4	15237.1	15317.8	9919.29	16110.8	15219.6	15380.2	18593.5	16524.3	17696.6	23675.9	19917.4	18283.1	16773.6	10535.7	12592.3	12948.4	14564.3	9016.14	16101.6	8877.5	17710.5	12466.9	20571.4	21825.8	22887.2	22857.8	17181.1	20458.3	22258.2	24810.3	16101	16223.1	17258.6	17466.5	17839.1	15592.1	17499.8	18676.3	21801.3	20862	26359.2	24540.7	22168.2	21633.1	19062.5
Peak_01360	0.646968	242.04	129.138	200	132.515	119.667	200	200	200	200	69.4657	140.738	196.023	59.7228	123.814	200	128.205	200	200	200	200	200	157.443	200	100.422	221.178	263.707	233.556	142.183	240.491	200	176.889	239.119	366.392	200	201.756	200	194.969	181.065	200	123.893	200	289.031	220.094	415.601	354.543	215.502	256.132	276.108
Peak_01361	3.65573	242.073	994.793	621.927	422.367	1482.14	920.428	607.785	510.663	678.409	327.537	1037.03	545.961	1303.52	617.19	580.093	495.666	1034.17	531.844	373.569	200	611.335	369.889	810.22	677.089	534.606	510.77	430.307	200	408.534	580.766	589.662	539.425	474.226	713.904	527.13	587.306	513.457	1887.39	768.129	413.735	756.081	588.357	621.65	927.845	530.923	547.878	655.547	407.533
Peak_01362	3.97175	242.09	832.13	782.269	777.708	909.4	200	741.439	200	966.874	260.6	390.112	283.494	116.144	200	200	200	397.487	612.625	704.577	742.386	775.579	681.845	200	806.485	728.007	496.014	102.781	638.744	464.037	200	366.338	251.676	557.873	800.45	893.712	821.812	933.644	830.579	717.547	760.938	887.792	200	200	422.649	306.24	200	200	200
Peak_01366	4.62645	242.285	4150.52	4869.52	3018.82	3818.74	4953.41	4348.4	4230.34	4279.82	3557.7	4586.13	3614.3	4558.64	4339.73	3877.01	4052.26	2750.85	3554.2	2188.25	4138.03	2188.01	3697.86	3562.32	4627.85	3420.78	3790.1	4487.83	8452.31	3791.79	3538.8	4213.52	4114.38	3646.83	3926.26	4307.92	3892.5	3763.61	3656.51	3598.5	3420.91	4485.57	4383.46	3932.18	5106.24	3865.72	4001.16	4183.7	3958.89
Peak_01367	5.06477	242.285	2822.23	3144.21	2186.09	3303.48	4125.36	3058.38	3322.15	2659	3036.89	3176.2	2606.89	3326.84	3760.2	3139.76	3106.42	2048.98	2780.54	1263.78	2080.49	1619.65	2539.16	2754.42	3526.65	2474.7	3277.67	3042.35	2851.43	3075.16	3193.31	3426.46	2852.05	3143.19	3497.42	3581.81	3912.37	2890.4	2937.4	3067.74	2926.22	3298.68	3258.56	2953.04	3585.05	3166.12	2754.95	2997.64	3263.69
Peak_01370	8.95997	242.285	962.418	1010.18	1128.2	924.115	1885.09	949.87	983.46	1116.11	689.946	997.543	934.62	328.344	821.833	700.707	1018.93	1098.59	200	952.036	582.146	864.038	1160.98	715.578	803.283	953.775	827.026	511.002	659.699	1241.74	1092.36	788.775	747.252	482.509	1383.95	615.033	967.33	858.026	1052.66	840.04	784.202	883.396	739.576	1217.91	1177.39	1049.2	1011.7	1270.92	557.449
Peak_01372	10.6849	242.285	1850.5	2196.42	2286.65	2275.49	2672.95	2516.88	2751.14	2422.88	1246.37	2553.9	2344.45	2276	200	2122.28	1704.12	1849.44	200	1776.71	2417.46	2210.85	200	2627.73	1947.84	1179.84	2751.15	2070.4	2574.92	2365.19	1736.58	2641.37	1570.91	200	1478.6	2263.14	1753.24	485.973	1638.26	2275.17	1866.25	2145.21	2518.59	2546.39	2239.05	3519.38	2203.39	173.559	1472.83
Peak_01380	11.0377	242.926	2554.5	2551.22	2584.6	2417.94	2754.11	2026.36	2587.98	2790.97	2295.41	2346.75	2697.5	2299.97	2392.03	2658.39	2366.93	2228.13	2196.66	2032.76	2775.93	2311.62	2641.22	3050.19	2190.19	2205.33	2479.93	2472.13	2745.56	2932.04	2425.42	2551.47	2572.58	2301.69	2322.24	2419.43	2907.27	2743.86	2588.77	2632.45	2076.47	2163.9	2487.52	2291.77	2389	2556.38	2494.69	2518.87	1780.67
Peak_01382	0.532388	243.003	5270.03	5243.86	5064.09	4694.78	2997.19	4779.54	4758.75	4863.13	5981.79	5199.75	5789.81	7577	6721.82	5420.03	5136.16	4280.74	4431.53	4344.7	4527.63	3100.98	5186.36	2905.89	5438.36	3798.81	6774.94	6668.19	7358.8	7330.78	5644.6	6081.79	6501.21	7893.42	4571.38	5277.11	4984.63	5382.8	5485.5	4874.09	5366.78	5532.64	6392.31	6100.94	7684.39	7340.51	7432.48	7061.3	6590.81
Peak_01383	0.797242	242.992	840.182	892.889	682.453	644.934	225.138	942.511	934.912	710.181	657.533	727.287	732.279	732.305	680.653	763.303	430.616	200	551.052	761.047	773.085	598.648	766.872	13.1323	806.875	716.003	611.004	778.628	595.482	733.796	678.759	846.457	777.555	910.41	751.288	729.057	690.973	761.799	607.213	665.942	692.683	865.456	696.313	504.698	733.751	651.199	867.075	824.105	638.516
Peak_01386	4.57608	243.066	796.487	737.863	741.967	438.022	754.799	733.139	772.089	991.906	718.808	775.752	776.726	892.909	756.195	679.402	591.834	625.2	664.364	200	533.969	526.41	653.142	200	736.402	576.342	796.381	795.397	665.787	722.782	575.364	612.696	713.59	200	587.614	662.615	414.092	639.198	825.652	837.426	638.437	617.448	599.615	586.978	842.415	690.088	579.896	589.254	632.937
Peak_01392	2.52785	243.124	717.699	698.9	677.747	600.144	1002.77	582.101	712.842	728.5	690.188	746.441	941.502	932.577	1009.27	988.031	1131.49	1085.18	1215.99	764.783	407.497	796.959	935.409	376.834	685.17	714.023	936.369	1053.43	737.001	720.204	1061.21	807.778	1030.48	901.778	986.668	913.415	910.101	958.729	1124.67	722.013	906.376	1192.32	827.021	990.733	1645.39	1082.75	1125.77	1100.59	1199.62
Peak_01393	6.27526	243.136	1291.84	1564.77	1059.89	1369.86	1524.83	1095.34	1376.49	1388.63	1216.25	1191.89	1467.61	1234.73	1488.73	1450.77	1264.79	858.799	1542.08	831.117	1240.52	1207.55	1490.24	1583.95	1221.61	992.05	1342.05	92.8689	198.806	882.179	1437.05	1195.82	981.522	1206.62	978.474	941.599	1241.48	1008.67	1079.02	1234.22	1127.51	1530.62	976.862	973.219	1355.02	1128.78	1142.97	1344.7	1240.83
Peak_01402	4.64317	243.288	581.975	766.664	510.941	503.857	923.896	601.386	702.938	764.59	974.411	708.12	585.172	762.94	735.172	762.302	693.168	992.536	643.834	470.565	714.729	651.747	520.756	793.809	583.322	489.313	633.01	911.729	1579.67	570.895	713.292	507.556	619.741	645.508	599.103	769.586	601.465	524.037	559.953	693.425	516.673	780.323	711.894	538.301	750.067	602.011	527.083	739.223	779.869
Peak_01403	5.08155	243.288	370.718	465.146	200	733.606	706.503	551.007	618.922	518.235	626.162	503.664	200	581.042	568.168	548.579	721.66	200	583.194	200	200	525.446	343.451	575.001	450.971	216.629	440.266	415.308	445.685	376.722	425.313	518.118	401.079	493.461	486.26	551.808	409.092	387.062	513.79	501.266	332.744	555.71	418.994	391.179	794.357	491.043	455.619	504.577	434.744
Peak_01417	10.9876	243.943	200	947.216	1123.3	627.243	1520.19	589.844	200	708.133	820.92	894.464	797.578	909.699	200	200	200	501.749	1110.05	999.89	1232.05	1218.19	1533.86	941.278	619.106	748.828	200	200	200	200	1031.25	200	536.068	200	691.921	590.839	825.228	667.928	200	200	200	880.76	595.925	1026.85	1150.8	1020.51	802.003	807.589	624.928
Peak_01419	0.532388	244	4971.97	4219.69	4747.93	4553.75	3485.17	4292.81	4285.43	4131.24	5635.42	4305.3	5113.51	6923.83	6134.74	5319.99	5136.15	3887.49	4956.98	4150.76	4426.93	3104.95	5177.31	3241.27	4994.7	3266.92	6262.49	7078.76	6198.08	6160.23	6427.17	5952.11	6695.72	7632.32	4211.59	4786.2	4736.49	5176.29	5674.23	4187.6	5025.47	5883.33	6134.25	5495.6	7900.69	7333.04	6730.75	6911.82	7030.72
Peak_01425	0.558667	244.999	857.167	777.063	660.397	846.805	200	691.375	651.616	650.119	924.238	716.176	995.047	1387.85	979.569	834.749	759.434	829.219	200	559.026	531.283	200	751.481	200	862.106	693.995	1087.08	973.294	1012.06	1016.17	200	1061.74	1260.96	1377.15	743.273	830.018	800.731	816.426	893.688	782.356	898.083	900.398	994.623	1119.32	1317.33	1225.2	1103.11	1395.4	910.588
Peak_01430	3.75465	245.082	3139.91	2782.68	2306.61	2699.47	3195.84	2598.71	2504.97	2668.27	2114.83	2896.15	2430.94	2520.79	2330.91	2472.29	2048.3	2105.64	1379.82	1447.05	2137.94	1687.55	2872.05	2070.52	2424.6	2321.05	2204.35	2537.51	2059.4	2383.16	2110.55	1975.24	2394.87	1804.19	2447.48	2674.55	2276.38	2306.22	3074.93	3124.13	2445.28	2878.73	2110.28	1932.1	2554.54	2214.25	1983.9	2093.14	1928.33
Peak_01431	4.00529	245.058	2768.37	2859.71	3106.3	2881.27	4412.88	3096.77	2501.03	3061.76	1297.74	1371.23	1298.04	2093.46	1674.34	2132.89	1941.77	1399.68	3101.13	1736.39	2900.84	2946.2	2347.97	3298.23	3294.83	2225.67	2541.09	2379.24	2349.58	2044.27	2211.75	2742	2682.75	2229.35	2818.97	3172.54	3022.48	3531.55	3087.8	3265.6	2511.95	3440.53	1384.11	1157.1	1618.68	1830.65	1791.51	1429.18	2073.54
Peak_01432	4.29031	245.081	417.63	285.773	392.59	331.532	344.333	310.413	383.526	583.703	200	200	200	459.059	366.968	395.124	422.053	200	222.62	350.774	416.347	409.266	576.638	514.263	395.016	681.331	160.161	200	123.492	200	225.452	362.935	553.723	302.562	550.205	523.387	358.722	411.059	419.555	414.539	568.863	697.617	200	200	535.662	340.94	286.674	324.555	200
Peak_01433	1.20928	245.066	1072.12	1067.48	865.177	925.249	1131.77	846.267	1132.4	937.764	519.404	489.475	519.361	625.874	705.108	480.271	416.842	200	917.817	1101.83	1144.76	783.615	1121.53	540.376	1094.71	837.164	455.917	200	398.306	565.486	493.76	571.493	442.652	361.507	1061.32	1174.7	1175.01	1373.04	1288.08	950.513	1070.75	1264.26	200	200	310.549	200	316.485	409.822	400.431
Peak_01435	2.80808	245.081	1729.34	1621.88	1400.69	1404.67	1790.16	1624.2	1757.08	1610.55	990.296	1123.26	1211.31	1217.25	1426.31	931.97	1105.78	810.396	1035.6	1369.79	1441.8	1027.74	1579.92	1500.5	1681.68	1397.44	982.132	979.903	1009.29	1087.89	1230.36	920.31	1019.88	1103.89	1431	1778.11	1267.48	1557.29	1520.39	1632.79	1632.22	1883.18	768.496	915.38	1092.26	1146.22	1113.62	1001.64	1364.92
Peak_01436	3.31204	245.082	1171.21	1282.69	1400.77	1043.67	1683.21	1186.67	1432.97	1343.47	1190.18	1124.79	1114.94	1151.58	1066.52	1012	939.327	873.92	1368.55	1429.36	1323.16	848.222	1272.67	1289.98	1341.87	1195.08	955.612	956.505	1040.34	1214.9	1173.95	1089.91	974.118	1247.07	1250.18	1481.93	1416.92	1284.86	1332.55	1114.71	1193.64	1541.2	892.096	661.399	1146.38	1063.87	1138.02	829.363	924.623
Peak_01437	5.03119	245.08	1814.31	2391.83	1683.74	2319.46	2841.73	1964.24	2472.13	1873.66	2257.36	2192.08	2028.55	2539.87	2347.38	2388.21	1942.75	1770.77	2451.88	1127.72	1155.98	1267	1885.41	1631.73	2180.97	1520.98	2110.19	1854.51	1724.63	1739.12	2313.87	2274.6	2079.62	1930.51	2057.77	2239.73	2076.12	2152.2	2115.92	2166.45	1951.43	2445.63	2011.72	1978.94	2465.55	2292.59	2046.12	2151.87	2138.11
Peak_01438	2.69318	245.093	813.593	859.137	584.818	824.162	599.858	1061.26	988.622	866.91	481.485	558.789	533.675	607.918	689.947	391.206	672.003	309.017	275.856	662.44	723.737	423.633	881.797	563.48	1065.37	745.156	658.885	5599.57	9004.55	602.554	428.387	686.644	626.658	630.355	1025.96	972.37	482.048	1122.44	708.076	809.385	992.344	923.666	679.817	657.178	431.195	792.069	551.236	484.909	405.253
Peak_01453	0.730278	247.045	380.379	346.164	350.031	239.506	200	250.036	399.994	228.035	76.9093	101.983	200	200	200	200	200	200	435.332	417.765	287.923	200	296.164	200	165.799	200	107.705	135.843	250.173	200	85.2601	200	34.8515	200	240.532	183.524	234.996	310.245	204.545	186.771	306.709	249.615	170.179	200	200	159.317	132.225	200	200
Peak_01456	3.75465	247.061	1168.46	1213.02	1169.47	1259.57	1336.23	1018.54	1147.87	1151.86	905.668	1181.42	984.956	1176.74	990.286	1065.5	1064.07	609.649	1107.06	926.197	949.363	1425.39	1226.57	1303.6	1178.1	1272.56	1016.22	978.489	867.484	1112.11	688.027	1097.91	764.158	782.774	917.624	1024.35	1001.86	1095.68	1310.3	1434.82	1085.8	1243.42	958.648	823.412	1163.13	951.425	839.508	843.546	744.741
Peak_01457	4.23995	247.061	945.591	968.138	1029.73	948.858	997.287	1031.55	874.15	1065.27	436.826	428.192	617.833	794.63	760.804	644.875	707.005	482.005	588.426	655.476	776.022	709.388	942.773	667.012	1312.49	1161.99	570.717	627.879	612.824	775.606	617.779	612.075	725.478	849.261	975.668	1088.57	1033.49	1116.74	1056.19	1059.38	1090.61	939.331	524.12	460.092	652.924	773.426	559.711	434.134	470.459
Peak_01459	3.68889	247.119	845.906	712.387	811.657	648.575	953.793	752.392	737.814	748.506	1758.72	2334.08	2088.9	2940.13	3151.72	2484.37	3417.82	2361.75	287.101	200	200	200	773.466	769.696	638.046	367.132	2103.79	2127.55	1963.77	1413.87	2081.96	1941.23	2646.04	1903.16	864.122	1281.52	1019.18	914.468	878.829	832.845	1131.31	1452.73	2309.35	2671.37	4292.47	3000.84	3097.2	2987.3	3662
Peak_01471	0.621449	249.044	6949.84	7235.17	6817.99	7027.14	3663.19	6506.27	5968.7	6505.59	9068.72	7761.41	9008.71	12171.9	7438.83	6578.26	6448.58	3178.67	5692.67	5138.04	5877.48	3553.2	6442.23	1720.31	6455.27	4750.53	11699.4	12539.7	12837.2	12264.9	8419.94	8953.83	9782.16	11234.4	6344.99	6397.05	8418.23	7474.75	7235.84	5688.78	6118.26	7408.68	11978.4	11429.7	14642.4	12994.8	10928	10834.4	11640.5
Peak_01472	0.697057	249.064	545.391	496.926	501.504	677.371	168.865	595.158	568.381	452.788	774.131	563.683	643.218	881.064	639.152	453.145	602.194	172.19	374.578	370.018	414.635	320.572	518.539	200	504.7	318.314	1223.4	1154.73	1016.55	945.893	562.55	741.93	867.458	949.076	561.52	505.292	498.005	680.804	577.871	479.052	565.423	617.863	1151.03	1033.5	952.297	1406.44	996.488	720.53	865.75
Peak_01474	4.1395	249.078	66378	72260.2	65871.3	67419.5	78677.2	62771.6	66168	68298.3	45020.1	52984.3	48717.6	68336.5	58965	53095.9	55325.8	39535.6	37567.7	40644.7	55843.4	46584.8	70857.7	34501.3	69934.6	59728.1	57594.2	57693.4	51794.5	52961.5	58626.3	57650.2	58996.3	58676.6	61598.6	73720.1	73861.3	67841.4	67986.1	67116.5	61973.6	74860.5	49688.3	46880.7	60113.8	58374.1	54368.5	46363.9	48011
Peak_01477	4.22323	249.146	440.879	381.683	383.467	504.374	483.146	380.76	431.777	375.125	251.569	388.061	292.134	463.995	364.546	380.925	354.451	344.945	463.646	203.628	393.495	283.923	449.897	299.246	459.582	403.422	383.258	437.164	381.473	290.349	339.203	406.917	389.768	371.543	390.471	495.255	498.014	457.347	442.239	509.788	431.359	480.512	273.912	342.094	401.085	499.099	320.865	282.342	262.019
Peak_01481	-0.0909927	249.222	1578.82	2198.48	1804.87	879.795	1653.19	1869.27	1751.89	1973.94	2341.57	2062.93	1650.71	1929.79	2033.05	1747.1	1649.64	1903.82	1643.64	1852.59	1795.22	1172.41	1891.9	200	2465	1653.81	1800.46	1893.56	2220.79	1998.1	2192.34	1718.18	2058.88	2086.56	2079.61	1886.24	1908.16	1495.11	1736.23	1981.51	1198.85	1678.28	1888.37	1644.13	2031.2	1715.98	1811.83	2093.54	1556.8
Peak_01482	0.654009	250.048	1220.43	1046.88	1162.92	937.851	200	950.991	951.755	456.609	1849.79	1307.85	1553.21	1875.56	1335.91	995.65	1108.38	689.667	1215.99	988.185	1051.45	1027.5	1070.81	200	1125.65	200	1911.42	2254.05	2383.15	2230.11	1659.74	1632.82	1738.46	2112.92	1201.86	987.68	1537.94	1192.68	1134.65	794.064	875.914	1307.6	2218	2085.52	2670.87	2253.51	2117.01	1954.13	2194.69
Peak_01483	0.780457	250.054	1187.96	1024.61	969.729	885.004	1134.09	1841.91	1143.57	917.309	807.509	792.058	769.267	1417.85	1171.95	1070.26	1066.76	254.481	993.448	832.376	960.302	959.354	1068.75	967.021	1407.2	1102.94	922.446	1027.01	1106.67	895.729	1045.21	992.543	978.128	986.649	699.044	753.971	587.004	1109.22	1328.64	986.745	1151.23	1109.58	1245.21	806.168	1733.8	1008.8	2261.98	1592.12	1136.94
Peak_01484	4.15622	250.081	9207.8	10314	7965.1	10081.4	10249.9	8813.25	9615.14	9670.59	6287.49	6996.94	7097.04	9228.97	7877.23	7404.01	7517.95	5096.03	4869.77	5195.32	6934.3	5891.27	9604.96	4385.02	9840.81	8059.74	8962.94	8052.48	7444.78	7390.88	7621.26	8385.99	8602.72	8195.88	9734.96	10114.2	10212.7	9952.26	9417.15	9463.87	9279.17	10329.8	7516.18	6815.33	9449.93	9088.46	7803.08	6003.9	6024.32
Peak_01485	4.27352	250.105	351.741	346.247	389.603	346.65	305.494	290.138	289.678	430.218	232.947	229.558	270.898	298.197	325.028	296.292	335.704	257.213	258.733	183.327	246.989	237.461	338.068	256.925	459.728	252.187	330.078	338.775	246.278	369.657	239.172	326.49	400.72	302.263	361.606	378.487	276.793	422.078	357.387	437.11	392.491	281.433	302.232	256.445	249.676	336.232	374.252	275.752	139.943
Peak_01487	4.74381	250.179	1047.34	709.507	742.178	838.981	978.972	1081.13	953.715	712.72	1132.91	846.184	738.18	583.725	964.479	864.71	1119.76	876.348	634.708	622.907	510.544	200	393.042	522.941	737.422	200	564.247	200	530.982	575.257	798.233	642.597	621.424	628.296	873.588	1234.38	642.786	693.598	1094.25	775.35	669.95	709.678	1277.53	742.5	1251.47	633.884	770.624	683.782	1518.41
Peak_01491	0.674908	251.043	941.389	971.301	904.194	914.927	494.206	796.655	683.692	818.307	1111.58	993.303	1130.01	1504.24	1084.27	855.703	1039.79	623.037	772.05	822.311	692.88	709.084	758.733	318.368	888.525	554.09	1589.89	1844.61	1760.66	1406.72	1262.8	1143.39	1389.64	1498.11	867.481	823.929	1014	991.412	985.761	796.849	781.692	1125.64	1643.73	1620.84	2135.92	1801.24	1781.24	1546.52	1608.79
Peak_01492	0.640272	251.045	689.159	673.931	682.844	715.314	200	558.275	275.41	626.889	725.608	793.569	711.501	1388.86	766.913	511.956	543.104	623.037	461.315	592.937	506.472	438.751	388.806	229.838	520.444	296.309	1218.58	1463.14	1215.33	995.993	591.154	605.413	872.693	1339.41	684.116	600.787	910.237	834.224	792.622	582.089	539.616	950.871	1138.37	1339.57	1860.76	885.505	1464.97	1268.3	972.672
Peak_01493	0.713649	251.057	1031.29	971.301	904.194	914.927	385.371	873.502	834.346	849.56	1111.58	967.731	1130.01	1504.24	1084.27	855.703	1039.79	266.327	820.352	822.311	851.942	709.084	846.873	523.011	1100.01	723.548	1589.89	1844.61	1760.66	1406.72	1262.8	1143.39	1389.64	1498.11	867.481	1071.06	1014	1008.01	985.761	930.631	1016.38	1318.19	1643.73	1620.84	2135.92	1801.24	1781.24	1543.55	1608.79
Peak_01495	6.74558	251.048	684.101	822.84	506.589	526.708	772.687	554.36	789.257	601.397	562.115	492.878	568.505	200	824.105	625.587	667.191	574.855	380.119	485.413	516.518	633.136	748.585	1058.58	588.732	200	684.328	200	636.153	200	541.636	875.665	865.721	421.769	451.749	583.396	479.076	661.038	681.47	642.068	738.317	681.577	533.729	200	589.091	657.695	580.109	626.887	731.434
Peak_01497	4.22323	251.082	1327.91	1334.49	1184.15	1502.23	1580.99	1113.15	1303.4	1482.37	831.673	965.425	1063.06	1234.59	1135.74	1003.16	1016.95	716.013	787.286	790.122	1070.1	863.557	1499.34	1317.03	1442	1059.53	1014.53	1016.3	942.171	1042.6	1290.96	1106.25	1118.56	1214.47	1412.12	1530.51	1337.43	1255.92	1369.99	1367.85	1148.65	1440.88	915.762	1057.71	1400.61	1094.98	1077.93	812.985	882.253
Peak_01505	-0.0909927	251.238	4304.76	4586.35	4640.27	3613.65	3906.18	4972.06	4599.77	3290.29	5292.92	5016.13	4876.96	5548.68	5649.84	4950.08	4579.38	3042.95	4548.32	4830.42	4250.27	3285.54	5084	3529.87	4707.09	3549.22	4244.71	4414.29	4099.82	5075.7	5760.9	4839.18	5659.96	5040.94	4543.52	4845.74	4836.99	4637.88	4513.25	5119.11	3454.46	5198.12	4321.04	4669.5	5543.79	4508.13	5088.91	4886.01	4380.89
Peak_01511	3.24489	252.088	1009.02	790.2	598.619	746.116	1112.43	736.296	910.207	817.719	508.556	613.523	560.428	614.889	757.968	507.735	772.878	615.642	1289.15	726.278	1000.76	793.432	1239.62	1112.58	829.484	1324.27	634.438	499.607	491.217	566.707	755.39	533.519	564.342	492.796	980.616	992.513	786.567	1051.18	1164.46	1033.08	1154.87	1410.09	374.708	363.304	540.824	528.604	575.344	411.845	680.383
Peak_01512	-0.0909927	252.241	200	1307.32	1062.13	200	1107.27	1113.31	889.174	530.086	914.694	200	1089.74	937.914	919.312	759.599	936.289	1032.22	200	988.669	902.271	200	656.003	589.999	809.762	1385.39	999.392	1167.17	902.108	947.853	873.553	200	945.611	1072.1	1006.38	820.068	1004.41	867.299	1108.12	1019.15	546.923	1637.35	908.226	1156.65	804.729	200	714.267	1082.11	872.193
Peak_01513	3.59668	252.581	743.48	686.971	535.31	888.664	824.805	677.235	728.102	716.54	200	401.076	635.735	452.068	353.137	200	465.847	350.152	656.342	780.659	459.979	751.5	904.409	426.139	726.586	950.701	200	620.846	378.4	530.766	200	283.81	668.165	200	983.064	994.584	1139.62	882.59	929.212	1209.32	832.609	1142.61	200	291.196	200	200	367.202	328.841	498.798
Peak_01516	3.14422	253.087	1746.7	1245.05	1230.3	1389.36	1880.48	1639.57	1359.56	1946.51	1498.14	1325.52	1676.93	3484.07	2635.02	1960.46	2161.77	1937.29	200	946.066	708.746	613.124	782.105	1806.65	730.488	839.868	2828.64	2517.31	2314.73	3048.7	3572.1	2840.5	2886.39	5238.01	1080.75	1398.47	1379.66	1577.97	1071.32	1006.9	1280.5	1738.66	1237.47	1150.42	2106.04	1981.21	2152.66	2216.5	2177.35
Peak_01517	3.58004	253.087	2194.89	2008.71	2752.16	1874.77	3703.39	2613.23	2825.36	3214.19	627.206	745.417	1020.62	200	1264.22	917.132	477.98	560.543	1018.32	784.696	1638.44	1179.75	3526.66	2978.52	2294.63	2180.39	787.116	747.516	1247.4	850.335	1171.32	1071.93	803.085	1405.95	1710.14	2083.77	2381.39	1948.17	3618.3	3136.27	2603.4	4195.27	652.979	736.495	1175	505.741	893.51	397.169	668.288
Peak_01519	3.2281	253.105	494.203	193.385	200	394.465	336.763	255.696	201.728	347.266	248.725	206.393	183.118	388.899	139.124	262.092	302.182	211.657	200	278.431	402.993	375.675	200	200	274.814	208	286.321	230.124	234.702	256.291	295.655	236.82	395.589	473.953	365.819	384.064	336.034	373.297	307.501	296.177	421.607	441.637	169.662	138.569	269.847	300.842	239.294	138.096	244.441
Peak_01526	4.02207	254.063	693.692	603.777	200	680.307	910.806	647.002	569.313	751.258	200	200	318.121	367.163	200	288.347	461.314	343.754	828.078	542.325	200	645.673	490.243	702.646	687.885	200	447.887	376.357	200	707.299	491.548	537.846	527.345	200	769.073	736.18	949.976	588.198	819.473	716.747	686.898	646.214	200	200	200	354.696	200	200	200
Peak_01535	0.558667	254.943	1354.36	988.12	1392.25	909.795	969.596	1348.57	847.939	1265.36	1961.79	1507.7	1555.2	1775.4	2235.09	1805.41	1284.18	1057.74	966.385	1721.15	1083.76	788.561	1307.13	618.826	1199.52	1306.15	1992.13	2023.01	2366.22	1998.25	2204.91	1843.27	2000.52	2919.17	1016.21	1173.06	1405.16	1078.1	1540.73	1042.57	1381.54	2154.57	2453.47	2100.55	2887.39	2176.13	3243.92	3318.58	2402.78
Peak_01539	0.713649	255.104	262.953	285.861	316.642	233.732	200	309.188	274.576	319.944	409.915	289.155	400.267	478.462	280.012	199.829	307.394	200	172.679	495.692	290.636	251.454	249.497	200	252.922	283.821	319.072	502.44	655.601	433.902	451.982	328.479	274.254	316.098	303.533	353.149	498.646	380.733	291.541	299.126	220.009	360.183	366.809	376.637	537.988	444.635	339.859	370.072	369.859
Peak_01540	3.80403	255.102	998.194	544.953	357.921	499.697	728.261	489.295	607.151	612.124	372.898	200	569.066	787.386	200	434.451	517.808	200	820.823	506.886	352.68	778.767	850.649	799.987	672.754	878.821	477.416	430.845	528.773	200	200	396.758	407.646	621.42	461.774	200	200	425.436	636.116	357.112	500.925	643.375	407.765	514.103	1006.53	520.472	574.647	456.404	443.83
Peak_01541	2.80808	255.123	557.692	482.618	200	461.406	869.081	530.694	417.718	389.817	709.658	705.426	576.588	608.366	908.114	521.225	766.955	834.572	200	200	438.532	482.819	551.029	200	389.064	367.788	750.419	200	466.819	479.296	1005.17	554.356	572.745	492.026	410.648	497.896	381.668	473.039	515.556	508.728	517.997	546.075	493.131	526.077	861.55	584.852	671.524	568.25	799.076
Peak_01542	4.94817	255.157	763.453	868.438	615.819	787.714	1424.88	800.263	972.93	663.755	720.437	939.345	780.24	1037.4	992.477	786.951	678.32	698.024	1038.84	753.812	842.935	643.933	746.686	634	697.155	812.167	831.609	668.27	653.495	728.79	850.67	809.029	848.444	778.618	885.558	999.626	792.038	767.822	786.592	737.808	825.452	921.055	791.591	678.086	1128.11	870.875	836.563	907.228	979.597
Peak_01544	11.0377	255.22	1048.19	1277.66	519.354	1212.37	200	729.931	1962.56	682.336	733.512	681.784	1015.12	1192.89	1644.12	1281.12	1099.95	200	200	200	579.375	200	988.3	952.817	1134.51	911.754	1414.16	1278.93	878.005	883.895	200	1493.27	1983.68	1467.26	1139.07	1457.92	1268.36	1953.77	1254.46	1472.08	1222.11	578.475	1306.17	1038.46	1304.39	1420.38	1517.79	866.318	200
Peak_01550	-0.0909927	255.269	3476.23	3785.73	2847.33	2676.45	3482.78	3562.62	3956.69	2166.94	3847.65	3262.14	3309.73	3768.46	4160.01	3701.98	3669.7	2421.23	3700.92	3676.62	2709.35	3191.05	3980.7	2282.55	3059.11	3289.23	3694.41	3624.63	2720.1	3581.22	3987.01	4218.25	3645.55	4189.21	1820.08	4173.19	4415.17	3631.42	4092.95	4098.05	2966.33	3652.74	3703.71	3317.04	4203.62	4261.3	3716.01	3761.18	3230.39
Peak_01553	0.54542	255.943	1119.3	772.497	808.348	615.479	708.978	852.566	631.843	790.344	680.815	725.974	704.78	663.278	705.027	706.207	635.249	652.682	615.521	824.152	817.059	657.754	912.686	200	765.933	578.455	928.64	816.993	992.132	844.315	807.357	874.272	833.619	917.347	649.674	882.722	824.969	963.324	906.092	696.505	760.4	826.979	1280.77	714.182	1439.53	1111.19	1314.58	899.966	1032.96
Peak_01562	7.2336	256.264	19296.6	23799.9	8915.52	15560.9	21834.7	11191.1	27731.8	54800.7	10341.3	11883.8	15769.7	10542.5	47651.2	16537.4	9737.35	8490.85	6335.66	7617.03	8934.68	6234.99	11817.5	11617.9	17346.4	10405.5	14752.7	16441.7	13968.1	5908.76	12770.3	13004.3	14578.5	9930.76	32185	10649.8	12035.6	22227.6	16045.6	13487	12626.6	13755.3	18833.1	10845.4	12235.5	11499.5	31458.8	11369.9	13964.8
Peak_01563	7.51925	256.265	6417.46	8048.18	3003.77	5197.38	7444.22	3906.07	9519.48	15513.3	3878.96	4077.62	4992.06	2726.26	16604.8	5903.94	4288.58	3080.14	2168.62	2574.25	1950.73	2274.18	4391.82	3865.25	6295.26	2938.92	5555.99	3134.29	3501.72	2030.26	3072	4646.91	5384.86	3299.42	11065.5	3828.11	4431.05	7891.27	5246.66	4773.12	4663.75	5154.06	6256.92	2998.32	4374.64	4429.8	10613.6	4388.54	4589.86
Peak_01564	-0.0909927	256.272	757.678	838.701	980.457	200	200	891.537	858.936	200	1053.69	530.371	684.196	869.445	964.002	613.157	954.218	522.385	400.164	796.857	546.377	646.358	733.108	603.394	666.365	402.273	200	1069.27	820.101	723.725	722.131	811.106	694.983	666.703	430.277	453.553	1014.58	741.106	1364.02	744.254	493.876	734.936	494.092	438.982	742.556	564.946	590.245	1009.17	821.464
Peak_01570	4.23995	257.049	200	200	200	511.064	290.276	200	310.513	200	362.468	429.349	512.398	352.118	448.341	343.344	310.996	279.335	218.848	200	200	200	200	200	281.672	200	329.635	422.863	348.018	200	209.657	416.902	375.096	200	181.735	252.657	204.076	223.599	348.081	278.232	283.744	200	462.678	345.565	474.33	316.059	352.535	320.05	384.507
Peak_01572	4.00529	257.082	3020.62	2306.67	2941.01	2644.42	3590.45	3047.23	2290.45	3264.27	808.58	636.653	1020.51	1365.44	945.297	839.339	970.737	909.792	1657.71	2120.38	2977.51	2057.13	2236.98	1544.25	3108.35	2212.17	1469.17	1038	1505.77	1809.58	1586.2	1399.6	1352.33	1750.4	2767.52	3007.82	2916.28	3161.29	2446.73	2472.11	2903.69	3179.18	677.538	625.447	882.306	1076.07	807.294	842.732	1083.91
Peak_01581	7.08186	257.247	479.24	360.558	297.904	333.84	453.568	362.401	361.054	252.433	200	372.927	258.407	802.597	358.649	313.274	390.879	268.608	200	200	401.286	200	385.274	200	242.809	327.075	333.887	617.853	279.406	440.951	454.868	455.783	313.849	200	276.698	293.07	301.628	470.241	408.775	358.824	291.347	334.208	200	473.504	290.209	362.838	289.74	366.466	455.356
Peak_01582	0.204996	257.248	997.175	1081.08	1263.1	200	200	701.722	1182.77	1004.51	719.843	495.67	459.834	1110.39	1015.3	901.838	1116.68	679.953	508.721	200	1051.18	860.758	517.095	486.511	557.136	890.857	1181.64	776.686	875.21	980.508	716.12	1062.74	868.746	1144.89	612.571	1255.09	943.767	506.109	1141.87	1415.7	571.678	925.887	579.914	775.671	1281.01	1295.07	1481.65	948.352	480.333
Peak_01607	7.25038	257.268	3699.62	3876.13	1638.95	2675.31	4050.47	2054.41	5167.26	10252	1910.64	2088.12	2511.82	1930.61	9111.74	2983.74	1852.74	1651.34	2446.5	1566.73	1735.63	1134.53	2088.87	2342.6	2745.99	1849.49	2502.93	2990.15	2623.5	841.85	2347.45	2445.84	2523.09	1649.41	5783.21	2005.44	2004.57	3905.46	3048.34	2090.96	2213.12	2437.57	3102.54	1816.09	2088.56	1836.05	6105.92	1971.23	2719.49
Peak_01608	0.558667	257.978	1643.93	1272.3	1856.45	1090.97	1318.83	1579.36	1100.54	1349.98	1175.29	1069.38	1318.29	1037.1	1329.14	944.619	876.829	988.235	1163.03	1032.39	1700.12	932.526	1501.69	880.124	1354.38	821.48	1451.33	1380.66	1573.16	1188.18	1300	813.32	908.642	1076.87	1269.71	1487.14	1447.43	1176.06	1634.41	1097.22	1181.72	1474.19	1796.74	1475.27	2293.31	1468.34	1803.32	1584.78	1432.91
Peak_01609	0.763696	258.05	969.202	762.656	641.31	624.163	857.5	1089.32	860.144	819.891	392.524	586.606	448.554	412.33	931.792	539.273	452.751	200	673.88	842.172	998.292	516.363	908.041	461.599	894.943	787.464	472.852	939.493	628.339	375.778	670.438	664.564	562.394	415.969	680.152	693.197	425.739	656.13	959.962	602.445	696.564	766.48	611.631	667.366	980.05	714.148	1272.56	845.796	200
Peak_01611	0.640272	258.111	1177.99	1187.04	1046.05	895.516	835.426	1138.01	1035.18	1085.45	1030.02	1130.52	1111.58	1369.68	951.309	976.803	1006.32	310.005	804.374	819.536	1025.03	760.046	1009.94	200	1152.49	760.749	1525.24	1313.75	1617.98	1602.99	1067.94	1212.55	1494.46	1452.39	1151.7	748.524	994.734	1168.39	1162.69	752.964	934.374	1095.32	1313.86	1213.87	1453.24	1523.86	1226.23	1341.73	1083.39
Peak_01617	0.713649	259.054	395.987	398.655	402.645	554.647	671.971	508.302	673.317	495.816	212.681	241.898	200	231.621	320.838	200	157.057	200	230.061	424.392	416.958	255.425	401.495	200	401.367	401.376	290.134	324.785	318.295	151.33	401.388	246.853	200	200	352.899	332.205	420.917	389.085	504.822	370.757	418.99	424.375	282.533	279.834	360.825	168.891	321.717	416.438	165.2
Peak_01618	0.713649	259.083	661.532	605.746	489.727	594.909	415.22	552.658	539.908	542.896	624.394	545.833	701.28	664.258	553.934	458.869	584.871	200	585.666	659.631	470.11	470.231	455.01	311.591	448.892	650.817	644.349	832.119	705.835	596.522	670.367	582.543	581.111	699.403	533.018	541.451	669.075	614.835	493.525	613.923	461.364	567.716	699.538	626.371	764.053	628.753	607.618	572.051	537.746
Peak_01619	3.47935	259.082	829.268	981.093	695.335	787.964	976.772	745.183	788.985	798.478	606.127	624.748	643.645	697.182	526.513	581.63	562.256	725.862	765.635	863.415	591.737	978.538	631.344	606.023	844.477	759.93	664.152	766.717	591.178	660.739	602.249	801.395	438.176	513.372	688.053	1151.51	759.866	1056.31	516.621	735.089	906.211	718.964	601.815	646.018	842.736	661.965	435.377	677.594	629.851
Peak_01620	3.955	259.098	33432.2	30676.3	31545.2	32126.4	37345.9	25506.8	20290.9	33655.4	12744.7	15988.8	16061.6	19542.5	9666.77	11445.7	9363.69	11990.1	20606.2	23154.1	29496.2	30691.4	30558.9	18573.5	24840.7	27412.7	16910.5	16713.4	18436.4	19948.2	15922	14164	12804.2	21380	29516.5	36777.2	29034.1	36134.4	29936.7	29861.1	30340.9	38730.9	11366.8	10659.9	16086.5	16587.4	7909.56	8898.34	11007.2
Peak_01622	2.11902	259.118	596.741	395.514	200	277.601	551.42	365.846	362.52	554.507	692.175	462.875	832.515	713.682	813.409	562.224	553.08	565.35	373.5	473.388	489.294	670.064	643.506	295.58	391.661	437.1	598.719	531.071	609.647	472.83	822.937	614.18	726.29	660.314	649.309	705.748	661.16	640.387	812.667	390.221	716.177	955.031	621.575	566.954	1114.07	656.696	685.342	901.114	788.791
Peak_01623	3.9885	259.136	395.467	270.963	287.514	355.53	220.748	262.382	283.703	270.142	200	141.406	253.887	175.844	200	200	129.913	200	424.375	126.037	242.531	246.72	180.359	183.839	215.23	189.433	148.693	164.199	104.685	102.059	72.3915	99.1087	90.0412	204.401	327.726	271.103	351.094	355.032	296.245	337.091	326.43	300.242	79.6429	33.2125	115.532	136.578	200	200	200
Peak_01626	4.17299	259.239	855.425	801.929	980.023	789.718	1762.06	920.064	765.697	909.376	1037.81	1368.85	1099.83	1049.37	984.905	1109.15	1065	1401.79	1433.97	871.005	910.479	1043.04	1221.79	1091.59	882.138	781.144	971.713	1085.25	788.224	1066.39	1330.08	943.569	967.192	738.46	793.896	665.959	959.212	686.687	868.635	846.485	608.9	1265.29	1225.56	1095.26	1353.03	1045.58	1029.19	1249.23	1336.93
Peak_01628	0.54542	260.011	459.856	455.622	511.273	555.912	200	381.71	497.682	568.31	751.877	645.661	710.743	713.298	625.284	525.359	467.522	562.273	508.207	655.324	484.343	672.909	636.66	200	311.466	505.72	469.172	396.658	599.444	651.036	765.766	558.481	532.264	611.811	490.933	348.84	472.386	432.557	451.633	544.296	171.757	671.028	548.464	586.39	648.078	526.279	526.849	706.896	739.274
Peak_01631	3.97175	260.101	5918.74	5519.42	4980.99	5182.68	5552.09	4492.43	3424.42	5851.98	1921.1	2557.58	2127.71	3209.74	1584.79	2034.34	1513.49	1674.02	3001.18	3412.66	4997.42	4316.65	4673.43	2514.61	4055.03	4608.11	2768.12	2686.38	2726.19	3163.55	2177.26	2309.68	2189.61	3415.2	5661.52	6117.47	4838.75	6558.33	4840.16	5025.31	5197.62	6010.04	1890.78	1792.2	2645.73	2678.64	1235.22	1394.44	1587.54
Peak_01636	0.797242	261.003	706.1	465.841	388.252	403.902	727.172	530.96	620.142	463.153	492.544	332.192	467.658	523.654	660.044	326.519	459.747	124.591	406.726	618.534	449.471	295.873	316.377	184.464	397.167	365.523	434.148	507.839	414.882	535.428	310.618	395.439	434.266	376.226	452.575	379.35	206.294	485.565	445.541	386.342	401.945	386.629	395.844	383.354	533.639	505.423	545.656	606.89	202.283
Peak_01637	0.640272	261.042	1497.06	1665.32	1780.3	1530.02	1446.45	1582.59	1902.96	1461.09	2103.85	2138.98	1858.16	2575.02	2096.69	1727.41	1644.21	919.874	1619.59	1453.2	1898.35	1060.63	1618.99	971.093	1884.22	1656.96	2068.18	3380.83	4433.45	2448.2	1822.07	2197.71	2178.03	2552.38	2032.57	2348.83	2627.06	2389.24	2268.6	1984.91	1991.42	2216.7	2394.48	2873.78	3008.39	3030.12	2999.51	3137.62	2570.85
Peak_01644	3.47935	261.113	717.004	890.143	691.908	870.102	1048.68	778.841	954.488	870.784	647.375	660.091	590.319	691.639	589.878	553.007	597.006	622.713	845.583	1140.56	770.809	1197.93	804.474	948.541	870.123	686.624	615.563	800.803	674.704	650.272	788.623	704.562	658.769	603.027	718.967	1219.57	962.366	1133.33	938.892	747.281	978.029	1110.15	595.149	448.703	714.002	557.762	576.714	200	622.415
Peak_01645	-0.0331044	261.132	2353.53	2493.92	2858.45	1572.8	2405.57	3208.51	2487.5	2535.03	2524.89	2674.57	2550.64	2628.96	3113.52	2917	2340.56	2392.9	2081.84	2387.58	2660.53	2098.68	2557.1	1347.83	2834.83	1879.9	2407.02	2381.63	2641.36	2748.29	2924.5	2480.02	2446.16	3088.6	2175.52	2540.04	2820.56	3043.87	2833.45	2840.42	1624.22	2744.78	2916.13	2735.12	2752.28	2421.44	2473.06	2566.96	1877.01
Peak_01653	0.697057	262.048	253.428	335.202	261.958	210.185	200	254.28	228.303	200	267.644	346.947	326.128	477.632	354.74	363.15	275.071	200	252.224	378.106	219.91	94.5277	232.682	200	300.371	230.262	446.557	653.869	820.184	462.477	413.622	341.618	388.045	521.067	226.527	299.678	445.073	288.773	261.099	306.265	255.324	396.851	564.119	409.319	745.408	671.778	549.053	632.587	651.844
Peak_01654	4.2065	262.068	312.696	521.345	200	613.165	511.817	420.421	578.741	464.861	626.907	841.175	472.42	1137.73	654.086	744.486	757.29	1101.11	740.115	200	633.066	469.386	507.364	523.174	554.204	442.599	588.79	742.759	536.499	429.347	902.661	649.633	547.544	484.231	219.618	462.809	519.433	570.326	312.692	402.788	511.318	800.745	780.74	723.281	883.327	575.603	834.144	838.137	559.428
Peak_01665	0.713649	263.018	4170.91	1305.49	2054.48	2779.15	1454.33	1570.91	1731.94	1565.44	1073.65	1038.26	1632.74	1885.67	1337.62	876.835	2596.43	871.429	3407.54	1549.14	1504.47	1882.95	1584.88	925.642	1295.13	1263.46	1689.31	1480.67	1421.25	1374.9	1728.9	1398.43	1105.57	1442.63	1141.54	1437.23	1080.35	1847.4	1278.69	1208.02	1253.58	1350.33	1265.37	756.367	1548.48	1458.48	890.838	1139.08	834.323
Peak_01666	0.640272	263.055	3456.75	2579.51	2947.78	2708.16	2172.27	2971.31	3085.38	3241.77	4861.39	3280.49	4237.02	4240.69	4582.23	5179.43	3914.65	2153.8	2380.33	2310.62	2978.63	1946.97	2744.39	880.221	2920.51	1838.6	4236.26	3922.06	3974.19	3732.02	4824.98	4309.85	4172.52	5211.95	3488.76	3391.44	3637.33	3597.96	3685.28	3202.29	3514.1	4173.18	4862.86	3782.16	5565.45	5077.68	6358.3	5903.79	5312.89
Peak_01668	3.19454	263.093	16085	15947.7	17059.3	16114.9	20300.3	17489.8	17417.4	17824.7	10135.2	10671.9	12370.9	13323.8	13665.7	10641.9	11692.8	11255.7	12212.7	17962.5	17997.5	14622.7	18215.6	12293.7	16963	14865.1	11598.1	9511.97	9690.49	14099.3	14983.2	12042.3	12008.9	14592.1	16387.6	18797	16401.2	16940.6	17345.3	15602.1	15846.9	19783.9	9158.56	10089	13949.1	11173.2	10737.9	11200.2	13640.9
Peak_01669	0.797242	263.085	156.443	30.537	200	47.5126	200	200	100.616	200	151.025	136.408	101.452	111.055	95.7552	109.638	189.117	200	200	200	78.5239	200	200	200	71.5738	200	85.1467	136.178	264.01	160.387	167.783	126.311	111.878	143.645	130.688	60.5763	97.3468	95.9773	120.469	94.7732	94.9585	175.714	206.742	87.6071	197.34	186.917	180.304	108.937	194.162
Peak_01672	3.37908	263.109	1969.02	1826.17	1649.88	2165.08	1681.67	2135.53	1868.54	1769.27	1170.61	1108.71	1191.52	1416.03	1441.69	1335.28	1299.56	829.448	862.964	1692.34	1823.46	1288.27	1902.72	948.96	2075.75	1548.07	1610.28	955.998	1000.14	1372	1095.42	1637.3	1500.54	1697.14	2047.72	2195.52	1422.5	2393.42	1867.29	1992.19	2287.41	2332.77	1379.97	1343.83	1491.28	1482.4	1156.34	1194.35	1084.86
Peak_01673	3.24489	263.126	394.98	465.199	333.499	490.37	562.089	478.383	405.857	430.072	317.968	217.57	240.393	342.137	372.155	311.551	291.696	228.585	202.107	363.136	461.85	291.419	420.412	477.575	632.429	358.885	441.428	1680.3	2964.93	339.069	318.664	439.635	395.677	429.214	396.534	485.76	304.179	534.367	527.139	513.593	508.28	455.646	463.457	448.617	539.564	487.033	362.86	268.623	286.498
Peak_01674	3.59668	263.129	3938.18	3021.3	3285.64	3229.8	5095.71	3809.48	3337.22	4089.39	1591.58	1741.64	2182.64	3320.97	2862.34	2549.58	2638.89	2289.5	2269.08	2705.62	2151.65	2793.81	3434.57	2746.69	3439.49	2881.03	2631.59	2468.74	2667.02	2612.66	2970.83	2596.84	3565.19	3910.47	3721.2	4422.62	3267.16	3861.03	4202.14	3527.22	3291.41	4944.59	1445.69	2015.44	2667.72	2427.89	2658.44	2083.98	3125.74
Peak_01677	-0.0909927	263.238	947.258	929.133	705.144	200	843.212	987.395	928.314	731.065	1095.66	1368.28	860.654	1157.64	1094.23	1008.88	968.295	200	873.371	1109.29	1424.32	1449.12	1092.71	963.668	1018.87	200	850.967	200	1379.75	984.807	1023.01	1123.63	1022.33	1089.69	926.094	971.97	1041.32	200	1053.01	947.709	200	1277.87	982.131	200	1523.66	200	995.286	1114.87	1292.59
Peak_01680	0.581901	263.934	445.734	551.435	573.485	636.679	200	578.449	519.068	610.539	200	469.886	353.657	493.549	925.893	708.982	200	200	753.794	742.786	536.132	469.664	749.351	200	534.299	474.91	463.298	518.354	1045.3	806.754	200	590.174	896.823	655.071	627.864	735.847	386.373	1008.1	523.792	700.201	657.599	636.332	769.896	497.392	554.972	613.646	803.641	607.8	632.006
Peak_01682	0.746939	264.056	433.148	393.617	376.41	318.024	277.938	358.682	385.729	333.645	436.023	391.824	502.047	487.172	444.103	497.267	348.134	200	273.87	391.126	338.121	423.652	348.898	200	390.052	165.525	494.752	475.76	380.59	359.588	427.014	348.907	572.567	587.353	320.505	404.849	413.952	408.948	418.735	375.225	514.498	576.943	530.42	431.861	643.584	583.332	778.668	652.677	545.136
Peak_01683	0.640272	264.077	809.424	884.547	787.666	823.846	487.951	833.359	751.957	762.491	1088.73	870.259	972.034	1406.53	963.768	789.417	704.558	200	832.069	857.448	884.299	650.667	841.422	273.218	793.372	498.145	1269.36	1763.33	1746.43	1284.37	1039.36	1125.09	1171.79	1150.61	957.787	760.179	1097.52	1084.72	998.329	1018.68	863.95	903.753	1733.33	1369.73	1729.11	1762.95	1464.38	1390.35	1442.11
Peak_01685	3.2281	264.096	2641.3	2487.61	2542.96	2551.15	3021.14	2493.21	2818.84	3030.97	1619.31	1722.53	1877.46	1805.8	2077.04	1631.72	1763.49	1392.88	1470.85	2683.6	2618.46	1893.26	3094.15	1585.04	2650.05	2401.56	1935.35	1328.29	1402.88	2189.31	1969.4	1949.42	1791.03	2296.6	2842.66	2785.58	2545.47	2937.91	2603.08	2658.75	2665.73	2851.15	1537.35	1489.98	2203.52	2090.89	1560.66	1564.48	1809.56
Peak_01689	4.3741	264.233	1492.6	1719.63	1435.12	1479.19	2006.04	1484.17	1817.06	1412.23	1470.07	1645.65	1237.87	1934.48	2020.37	1708.27	1686.15	1313.84	1580.35	1211.77	1689.4	920.069	1495.86	1267.91	1371.75	1031.86	1522.14	1785.95	1536.51	1382.22	1637.05	1745.73	1879.38	1371.55	1314.74	1530.32	1637	1385.5	1411.65	1548.35	1390.32	1737.51	1865.24	1507.17	1782.49	1496.83	1612.17	1697.34	1696.16
Peak_01693	0.532388	265.019	4702.25	3802.43	3744.67	3413.8	2250.18	3615.55	3074.29	3300.46	4447.84	3841.1	4424.93	5799.41	4915.76	4274.75	3367.14	2269.03	3189.9	3033.96	3550.64	2234.12	3985.1	2072.17	3909.62	2883.14	5887.64	5756.72	6106.18	5782.41	4548.39	4786.73	5209.11	6549.74	3507.93	3516.82	4006.46	4210.01	4237.69	3317.43	3988.17	4673.1	5423	5156.38	6792.34	6017.27	6240.53	6081.63	4962.83
Peak_01694	0.746939	265.054	422.896	354.606	295.718	318.235	227.34	254.09	308.484	422.213	359.201	331.33	430.011	309.085	442.189	475.416	398.79	200	374.323	355.06	243.054	87.2501	337.423	130.141	290.292	230.133	387.064	385.978	336.42	393.483	397.789	320.992	459.477	475.618	377.725	315.935	422.555	375.922	351.106	134.296	320.609	377.05	516.052	419.556	644.469	434.815	662.909	533.472	418.117
Peak_01695	3.29525	265.071	589.527	710.839	476.58	615.595	808.246	814.459	904.487	746.956	948.194	745.115	760.698	775.534	520.586	736.409	627.11	745.795	644.573	570.455	881.971	754.031	647.681	649.013	982.003	391.913	747.913	602.749	688.957	727.006	200	704.21	801.765	602.335	602.291	838.883	779.232	708.188	750.839	673.456	665.025	781.137	471.243	626.922	626.319	743.19	764.592	581.079	669.099
Peak_01696	3.67214	265.073	13930	13927	11332	13414.9	14759.5	13768.9	13760.2	12991.4	9894.83	13432.7	10964.6	12369	12194.1	11386.1	10790.7	8701.59	7128.97	7768.1	9847.99	8362.05	12702.2	6975.59	12733.4	11992.8	11454.2	11535.9	10297.4	10911.2	9502.19	10597.9	11358	9547.16	11939.9	13109.5	11329.3	12274.4	14327.1	14414.8	11962	14904.2	10531.1	9219.37	12607.8	11042.6	9318.53	9432.83	9472.93
Peak_01697	4.22323	265.072	9849.18	10683.6	9340.3	9587.19	10202.9	9481.87	9843.62	10828	6369.81	6565.78	7370.37	8896.26	7910.73	6920.16	7561.99	5154.47	5913.56	6479.69	8074.93	6985.74	10174.1	5609.04	9921.27	9090.89	7847.29	7885.13	6921.79	7898.41	8350.98	8089.83	8327.02	8590.11	9481.35	11051.5	10941.2	9951.6	9498.55	9295.66	9071.58	10218.9	6717.08	6474.97	8718.96	8727.97	7557.73	6526.49	6889.42
Peak_01699	0.697057	265.079	243.338	269.818	188.926	277.163	182.02	205.648	198.425	189.008	202.905	206.834	352.422	278.481	230.015	185.112	169.253	200	135.959	330.196	219.066	200	205.22	200	239.121	250.192	350.805	329.093	396.748	285.411	291.965	280.276	451.281	313.031	227.428	224.682	315.809	224.709	276.549	161.748	324.653	192.499	371.652	270.945	454.07	378.481	394.921	302.826	342.381
Peak_01700	4.23995	265.089	920.183	980.886	743.442	927.989	814.124	640.887	833.59	885.89	495.671	666.192	630.7	706.91	683.319	551.811	661.118	352.785	403.21	412.501	611	571.204	764.613	567.762	900.469	708.78	853.422	770.406	600.248	594.342	492.197	832.439	737.921	732.99	1071.94	915.745	603.881	979.47	831.107	959.085	1050.97	999.863	583.834	644.661	660.652	907.838	566.293	379.526	418.092
Peak_01701	3.21132	265.106	831.132	797.404	876.155	461.296	1031.33	915.823	796.204	707.299	500.142	520.195	812.27	764.408	912.872	754.738	657.499	415.87	713.774	700.663	732.941	843.548	803.904	1057.82	583.181	477.165	557.123	510.945	399.251	605.402	779.777	647.524	648.767	845.476	617.124	868.48	387.043	777.167	884.502	690.788	754.136	1022.63	351.101	412.001	835.867	483.71	718.62	501.247	413.046
Peak_01705	2.69318	265.145	3790.94	3355.19	2781.23	3461.41	4190.73	3202.99	3166.61	3490.56	3288.42	3094.07	4112.3	3360.62	2882.56	3364.89	3312.41	2788.41	2157.06	2998.29	3119.38	2855.14	3277.85	2143.35	3789.28	2492.24	3226.24	3123.61	3028.86	3378.12	2839.83	3089.59	3463.76	3646.31	3271.57	3679.33	2249.57	4104.62	2804.67	3200.19	3712.24	3606.86	2866.44	2820.11	4063.09	2769.58	2235.67	2864.94	3756.09
Peak_01710	7.25038	265.254	3311.66	4185.71	1312.39	2234.03	5052.61	1511.47	5828.29	15015.4	1698.09	1676.06	2963.96	1312.96	9060.26	2682.08	994.855	733.532	1631.92	940.852	756.257	1077.04	1546.46	1200.07	2373.17	1202.73	1749.25	2146.01	2590.81	769.401	1924.34	1424.01	1546.95	932.534	6809.63	1380.52	1401.65	4413.33	3598.91	1870.02	1682.17	1972.82	3431.23	1089.54	1424.28	1227.61	7541.66	1297.9	2049.02
Peak_01711	-0.0331044	265.253	1219.94	1245.17	1275.25	1213.6	1264.21	1434.93	1093.87	1312.02	1469.47	1102.23	1085.38	1338.56	1097.55	1507.96	1144.03	1007.48	1359.53	1450.91	1288.2	842.302	1223.03	200	1403.09	1144.04	200	1021.6	999.874	1553.52	1315.3	1507.16	1011.94	200	1285.7	1336.34	1118.53	1082.81	1242.71	1279.7	912.896	1210.67	1414.39	200	1204.66	1244.92	1415.96	1197.19	598.088
Peak_01715	0.592674	265.931	200	400.553	366.539	398.617	200	355.543	499.091	461.459	200	441.516	316.589	332.071	748.352	321.981	273.137	383.355	200	440.009	363.193	200	311.954	200	408.475	316.093	351.282	200	773.445	620.615	200	200	454.765	434.016	200	388.596	385.582	200	235.617	472.96	616.818	505.727	581.766	200	466.919	200	537.177	200	454.097
Peak_01721	0.558667	266.019	1250.31	1231.45	1254.15	1078.96	658.675	1110.05	874.294	1140.2	1556.41	1018.6	1395.63	1767.84	1482.14	1352.1	1000.44	877.494	1128.79	1040.03	964.04	1038.41	1128.36	676.812	1104.98	947.585	1549.04	1902.42	1858.45	1799.94	1760.39	1567.4	1588.2	2214.16	882.82	1161.89	1130.55	1124.59	1303.18	1000.49	1234.73	1346.53	1664.62	1609.62	2412.33	1947.09	1922.65	1944.64	1593.09
Peak_01722	0.713649	266.075	633.157	538.483	630.98	602.751	270.305	419.738	594.564	458.927	564.973	486.013	352.095	453.18	444.337	399.257	262.383	200	450.675	367.26	394.617	471.041	593.84	264.592	676.125	485.373	348.648	568.785	547.903	432.78	542.141	402.913	427.178	351.474	428.486	329.832	438.12	526.064	633.726	411.82	550.346	538.4	561.842	417.616	571.007	516.74	520.167	632.09	547.679
Peak_01723	3.73886	266.075	1711.74	1832.82	1390.13	1821.6	2302.52	1767.29	1902.61	1924.86	1370.45	1849.13	1362.63	1484	1597.6	1544.02	1653.39	1186.05	987.757	1073	1163.33	1146.36	1649.3	1559.28	1476.73	1401.23	1620.28	1587.49	1324.95	1545.59	1164.25	1440.2	1595.85	1362.33	1627.77	1709.21	1510.7	1807.98	1925.56	1894.61	1641.7	2270.3	1419.67	1221.78	1786.25	1491.25	1256.44	1337.85	1170.14
Peak_01724	4.23995	266.075	1296.68	1468.43	1231.54	1480.86	1494.45	1395.44	1458.77	1321.62	901.42	827.287	885.731	1284.71	1363.75	1117.79	1239.15	1228.67	1333.79	864.831	1149.21	1073.24	1326.46	628.086	1497.6	1291.68	1141.03	1127.29	1012.07	1113.25	1278.06	1155.68	1070.07	1195.73	1374.23	1544.54	1509.71	1459.12	1337.97	1335.62	1377.95	1608.17	936.499	882.965	1288.62	1142.27	971.227	936.254	979.536
Peak_01725	2.70948	266.148	520.434	465.854	200	538.731	516.311	445.296	508.321	534.254	533.241	603.625	638.506	439.221	487.024	411.071	416.692	497.633	464.976	200	551.785	567.883	349.827	570.926	200	200	472.544	562.09	370.962	200	564.189	200	581.654	200	522.574	652.867	200	492.113	200	520.846	556.796	444.203	331.075	354.231	467.028	356.272	319.487	381.202	606.816
Peak_01731	4.34068	266.515	90.8515	144.529	155.901	141.154	96.5188	203.616	125.157	103.76	200	2.36664	200	87.1806	200	43.8701	200	105.885	113.239	200	194.034	221.475	155.074	182.45	125.785	133.262	20.6722	141.575	97.8415	200	87.9485	200	107.983	100.578	94.891	107.906	185.31	136.16	43.1751	73.1105	137.895	181.889	200	200	5.34386	60.4963	200	200	13.8591
Peak_01733	4.44157	266.789	170.784	197.623	234.873	157.159	215.255	124.389	210.392	145.231	59.1914	82.0156	102.471	127.291	127.792	29.8068	47.0562	65.4522	144.969	112.702	134.216	175.835	198.437	79.7583	143.257	170.262	100.824	88.9408	128.605	103.8	114.529	77.9969	59.8214	163.612	143.942	158.12	76.0228	161.194	137.15	198.371	179.914	222.956	200	200	100.206	177.904	51.3126	37.0347	100.677
Peak_01734	0.640272	266.926	580.313	495.946	473.725	433.999	200	397.287	315.573	462.841	362.735	432.01	377.537	200	443.638	338.226	369.393	390.626	446.281	344.733	353.211	200	200	200	385.924	412.199	454.945	610.305	438.323	424.277	379.609	374.233	456.383	497.125	200	264.864	200	432.96	401.912	403.98	237.345	457.083	293.675	463.701	413.92	486.814	426.142	383.865	442.907
Peak_01735	0.558667	267.015	1116.56	988.41	1015.86	1076.52	896.487	982.609	797.807	865.087	1310.11	905.489	1224.07	1636.63	1272.96	1121.67	1045.03	1039.36	998.209	826.875	962.254	1093.27	1051.05	200	1023.58	680.399	1503.37	1757.11	1629.52	1551.25	1497.67	1300.66	1434.56	1805.83	988.458	1230.52	1054.86	1221.03	1054.53	905.701	1314.9	1188.52	1838.72	1627.43	2098.61	1726.29	1850.57	1808.33	1483.08
Peak_01736	1.19285	267.048	770.212	971.817	682.769	777.393	1172.88	776.118	700.568	754.942	371.872	422.585	434.738	479.649	397.633	445.581	311.134	200	894.536	1098.26	1097.68	932.544	938.074	624.115	942.664	953.614	436.156	200	212.76	489.155	485.967	441.189	363.539	441.614	931.385	973.641	743.553	1034.88	1074.25	893.136	989.437	1298.11	368.586	272.024	287.427	395.755	405.644	200	397.85
Peak_01739	4.1395	267.088	531438	530081	607434	599444	796990	522535	592298	592101	385359	397336	427132	551915	442060	416998	449551	379009	432758	437908	494067	525654	647641	394260	557981	499710	435905	467650	416525	431503	551087	449420	464811	532290	547500	680727	555947	580364	588090	568023	546674	698892	362796	359250	524485	456415	423404	389568	444349
Peak_01750	2.92523	267.123	820.133	509.97	629.223	407.974	738.762	518.982	413.931	718	666.647	765.055	642.995	722.731	765.131	629.395	779.654	661.274	631.854	200	565.298	653.204	516.017	603.342	499.754	200	871.206	658.201	674.819	699.996	952.687	927.057	1028.19	865.776	727.021	682.835	798.429	952.877	614.157	498.432	744.43	664.266	615.503	610.568	960.024	642.641	638.624	699.867	866.239
Peak_01755	4.42465	267.186	1198.59	1251.04	1119.66	1236.9	1238.86	1097.63	1322.43	1248.05	691.814	535.349	714.686	991.784	908.504	734.499	807.175	654.427	711.01	784.45	893.409	1049.94	1260.89	497.747	1289.23	1073.18	1037.41	940.709	893.154	890.042	697.075	837.264	953.974	1010.78	1263.05	1494.28	1109.96	1379.55	1222.04	1371.24	1246.3	1296.45	749.359	682.082	925.513	1054.55	806.853	681.102	644.739
Peak_01760	4.23995	267.496	302.587	298.442	258.971	283.405	353.248	294.9	272.927	314.633	160.312	184.133	188.144	243.965	189.864	198.648	177.877	230.052	272.055	212.856	307.241	215.461	304.365	299.143	337.207	225.151	217.023	239.296	250.508	190.539	248.135	191.388	186.22	236.227	290.1	314.727	267.009	289.423	304.726	270.541	264.358	291.361	147.927	173.418	231.724	217.745	200.634	122.741	172.343
Peak_01767	4.1395	268.092	90472.9	96732.9	85729.2	92532.2	91752.1	87130.6	88311.3	95059.1	55253.5	62321.6	62920.4	81146.8	70979	62745.2	65118.3	46346.2	53724.6	56334.6	75809.2	63752.2	95301.8	48736.1	95795.5	81367.6	71893.4	68470.2	65028.7	69403.8	67596.3	71302.4	74162.2	80164.2	89361.5	96978.8	97602.5	95133.4	89820.8	90883.6	89651.1	96922.6	60203.9	57874.7	76353.3	74633.1	65597.6	55734.1	55835.6
Peak_01768	0.847468	268.106	22986.6	13990.1	10856.4	15972	14505	19169.2	14576.2	16166	18622.6	17751.9	19117.9	18138.5	15231.6	18757.5	17465.5	8093.51	15412.6	11079.7	10999.1	11821.9	16329.6	8117.89	13502.4	14146.9	12430.3	19074.5	10760.3	13064.4	9692.92	14888.7	13263	15278.5	14070	10014.3	20377.1	19281.6	11857	13209.9	15733.5	13444.1	14256.1	15520.6	16448.2	10754.2	11598.3	10503.1	16143.7
Peak_01769	0.880694	268.136	612.1	245.61	306.472	335.273	201.433	369.239	319.914	320.902	422.399	393.501	360.956	433.02	417.963	464.855	416.8	98.5937	293.512	207.79	183.989	258.858	410.992	253.365	268.223	234.468	302.545	425.18	202.903	347.755	154.03	385.176	299.288	348.634	288.835	157.011	361.406	464.912	205.527	231.727	423.72	275.355	352.647	394.531	208.595	214.952	320.878	199.081	352.554
Peak_01771	4.23995	268.18	367.372	299.247	263.252	270.058	302.603	283.242	285.449	329.165	261.892	111.355	299.749	245.641	300.95	211.723	199.95	160.303	221.168	208.603	247.558	291.455	362.378	237.828	325.814	271.618	293.287	225.231	251.928	216.547	229.067	241.461	304.674	291.354	286.354	393.222	378.966	368.459	331.839	335.06	315.956	309.726	206.799	199.96	246.729	221.415	230.796	250.915	160.575
Peak_01772	6.99765	268.265	592.8	653.119	200	238.627	762.69	200	773.5	3472.93	276.097	200	442.597	445.596	1594.98	278.977	200	200	200	200	116.684	200	200	200	197.569	200	363.05	447.578	432.051	200	407.085	200	233.887	267.676	1266.63	200	200	662.428	714.717	292.61	257.862	316.334	544.436	158.247	200	292.248	1041.84	216.409	278.991
Peak_01773	0.558667	268.949	1358.89	1073.66	1106.27	1149.73	809.654	1015.93	1002.09	1134.67	1578.59	1406.95	1449.54	1810.75	1441.04	1410.7	1559	908.328	1093.46	988.508	1014	653.326	1147.65	1176.1	1339.68	833.174	1880.96	1712.36	2019.91	1808.2	1649.81	1561.88	1697.49	2028.1	1156.46	1131.42	1196.61	1372.37	1374.67	1167.1	1430.46	1731.33	1619.77	1249.76	2128.2	1740.19	1808.94	1928.31	1813.48
Peak_01775	0.674908	268.984	3146.47	3799.35	3246.03	3558.02	2797.31	3051.32	5415.06	3773.29	2439.84	3012.99	2175.31	2501.07	3625.07	3514.42	3013.18	2854.35	3250.18	3414.83	3236.4	2570.7	3939.85	1611.92	3686.75	3178.37	1589.58	1393.94	1428.23	1731.24	2278.78	2552.47	2045.53	2460.15	1958.26	2511.12	1863.63	2566.96	3600.7	3644.71	3330.9	3152.22	1387.89	1219.12	1935.25	1318.65	2146.31	2940.56	1824.02
Peak_01777	2.47803	269.081	2793.38	2016.36	2151.13	1737.86	2668.92	2598.83	1844.91	2555.32	1716.06	1755.67	2202.46	1822.13	1668.66	1505.81	1251.13	1063.37	1944.34	2069.01	1694.89	1492	2370.74	1234.23	1767.99	1811.67	1746.72	1863.64	1944.95	1762.76	2043.81	1711.32	1740.08	1840.26	1823.92	2074.72	1744.86	2161.45	1967.09	2072.87	2015.68	2271.5	1210.49	1546.13	2078.24	1539.68	1621.47	1700	1545.29
Peak_01778	3.02582	269.101	11270.7	11399.3	12515.2	11191.3	15323.9	12078.8	12022.5	12634.4	6872.98	7387.59	8578.98	9158.97	8877.25	7246.96	8161.69	7859.07	9241.59	13416.8	12805.3	10802.8	13024	9686.76	11609.3	10119.9	8904.2	7029.37	7371.08	9044.97	10378.6	8609.79	8996.24	10421.1	11072	13145.3	11133.2	13130.9	11836.4	11806.5	12146.1	14044	6774.56	6712.74	10024.1	8456.99	7762.15	7280.85	9623.44
Peak_01779	3.87118	269.08	1975.24	1816.42	2293.07	2062.66	2350.83	2480.17	1881.33	3332.48	451.746	200	456.63	200	200	200	340.147	200	3061.05	2407.33	2971.06	3113.78	3010.55	200	3188.45	3330.78	804.989	200	670.136	768.177	200	200	200	805.305	3319.38	3995.53	3403.55	4617.33	2249.05	2547.29	3630.64	3486.03	595.367	417.114	1186.01	200	200	200	853.85
Peak_01780	4.15622	269.094	12793.7	13331.5	13612.5	12660.3	15542.5	11965.7	13208.7	13250.8	8018.15	9270.08	9166.45	11938	10453.7	9339.25	9961.43	8210.1	9054.1	9340.26	10443.9	10251.3	14379.1	8274.28	12808.9	11410	9779.07	9892.21	8973.95	9451.71	11309.5	10336.7	10422.6	10769.2	12022.9	13657.9	13432.3	12863.1	12702.2	12838.9	12667.2	14139.5	8462.64	7831.79	11280.2	10424.1	9096.9	8206.28	9083.94
Peak_01781	0.864081	269.108	2751.89	1819.16	1457.08	1788.37	1678.73	2299.45	1878.25	1737.6	2280.72	1907.59	2274.72	2149.5	1802.89	2202.88	2273.23	981.241	2122.15	1362.39	1417.23	1668.62	2013.36	974.868	1600.93	1715.01	1338.86	2537.39	1143.95	1508.02	1312.2	1892.76	1361.91	1849.56	1679.19	1108.44	2150.85	2137.4	1599.57	1486.79	1626.51	1483.2	1602.3	1864.5	1726.3	1261.94	1502.96	1336.59	2263.82
Peak_01782	2.39617	269.104	7012.99	4059.83	3913.44	4362.91	7427.19	6046.72	4753.49	5501.36	3717.65	3709.95	6464.72	5269.54	4925.67	4024.46	4230.37	3549.24	5540.69	4247.2	3155.87	3750.33	7445.35	3933.83	4706.42	8223.77	5125.23	4977.14	5338.22	4968.82	6007.97	4718.48	4249.62	5769.08	5495.38	3272.12	3063.67	3233.81	7170.57	4327.15	4538.7	5428.13	5083.25	8249.93	11278.8	7218.21	10577.3	6809.11	6983.81
Peak_01783	3.21132	269.138	149.272	294.88	213.674	208.464	198.271	276.006	278.604	306.931	200	73.8037	108.024	72.2179	116.898	200	55.9793	200	348.955	316.294	280.823	411.773	484.982	466.091	303.722	128.955	47.1644	57.0695	200	83.8857	72.5125	149.186	72.0395	79.5441	508.046	393.943	189.568	302.425	396.766	380.163	375.465	322.06	53.8074	200	200	75.6939	120.742	200	5.27678
Peak_01784	3.47935	269.139	28.084	115.042	106.144	95.3299	55.7555	65.095	112.661	153.598	175.828	15.2918	269.872	200	341.548	200	461.77	200	200	60.2348	56.1672	76.8125	110.817	67.0806	78.9798	28.2831	319.888	253.219	200	224.93	437.279	286.573	262.107	49.6389	140.31	122.66	88.415	105.602	72.9667	99.9938	130.955	76.6769	436.464	606.705	693.471	549.189	922.058	694.756	508.594
Peak_01786	4.27352	269.151	2706.97	3139.39	2186.47	2847.22	3046.77	2548.43	3315.2	2731.84	2672.07	3770.73	2703.99	3257.67	3805.21	3282.41	3088.92	2086.25	2459.38	1370.72	1788.76	1515.21	2810.49	2253.67	2924.59	2282.07	3407.19	3312.69	2662.08	2694.31	2476.02	3632.83	3465.51	2821.39	2565.92	2770.89	2981.6	2597.23	2662.2	3186.42	2568.65	2866.07	3648.53	3156.57	3315.21	3636.25	3540.72	3147.55	3165.72
Peak_01789	5.97356	269.21	1046.37	1509.71	1162.51	959.739	1438.03	951.714	1235.62	1169.41	1232.15	941.449	1108.21	1070.38	1125.22	1195.12	1007.88	1443.96	1282.13	703.597	1253.28	635.616	1288.58	1451.54	1186.79	569.947	1094.59	200	200	519.564	1209.69	1311.79	794.092	1045.6	1027.78	762.753	1092.92	921.759	1002.29	1247.6	990.686	1230.35	985.564	1091.56	1410.37	1241.66	1127.54	1136.24	1284.71
Peak_01791	0.570455	269.95	589.903	492.899	465.887	441.085	200	397.831	488.921	464.2	567.599	447.332	673.269	682.583	200	550.815	578.221	365.197	200	720.685	401.05	459.459	489.974	200	582.49	504.358	767.198	896.494	768.2	707.083	833.034	731.742	756.105	965.16	419.505	420.502	544.286	674.588	530.009	624.091	691.234	705.641	724.309	621.78	952.5	731.018	1042.49	795.971	753.205
Peak_01796	0.713649	270.077	93.1238	228.203	200	200	200	200	200	200	239.686	390.003	244.827	445.103	335.975	294.581	200	200	144.617	336.515	200	200	187.409	200	193.198	200	270.75	452.774	487.644	302.407	523.754	391.36	338.773	357.937	133.505	200	296.506	174.743	136.328	245.033	209.842	200	448.143	376.641	489.222	333.823	475.986	302.451	571.998
Peak_01800	4.22323	270.095	1282.21	1450.96	1081.54	1200.37	1340.48	1213.29	1210.82	1341.37	742.515	770.787	921.692	1289.88	962.179	871.626	940.407	962.742	1222.74	869.207	1066.62	1052.87	1601.97	1276.05	1339.71	1259.35	1000.99	973.052	858.023	843.447	1036.74	1056.07	994.559	1101.96	1247.64	1336.54	1407.94	1218.89	1498.48	1070.88	1346.31	1379.98	820.864	881.544	1081.46	1148.75	846.08	790.053	807.805
Peak_01801	2.54452	270.106	1037.8	542.285	533.158	609.311	979.874	945.726	661.443	692.634	476.424	521.266	876.027	777.81	671.29	649.521	521.124	382.927	920.088	513.187	387.762	695.794	1113.09	722.727	691.017	1200.86	733.147	683.989	718.311	876.792	733.823	641.602	593.486	867.313	918.642	387.502	483.161	282.992	1239.05	634.672	604.784	854.303	663.464	1228.58	1729.76	1248.43	1590.46	855.686	889.361
Peak_01802	3.24489	270.107	1987.14	1697.04	1830.32	1697.99	1805.05	1784.31	1741.51	2088.36	989.576	1006.68	1301.15	1247.98	1310.07	997.879	1215.04	962.15	1118.2	1762.41	1844.71	1437.39	1860.01	1284.36	1698.83	1816.41	1250.77	1138.22	1057.33	1343.56	1408.98	1214.74	1255.47	1551.28	1708.59	2251.11	1854.32	1805.68	1817.71	1733.37	1932.37	1886.33	905.676	1057.39	1248.9	1117.94	1061.6	1204.87	1227.89
Peak_01805	4.3071	270.154	343.113	305.044	200	425.432	523.834	451.37	331.398	461.641	528.695	452.659	335.246	442.836	485.985	504.67	457.891	417.626	200	275.046	352.227	200	357.308	200	385.875	230.827	382.911	462.942	362.216	368.592	458.572	455.782	454.639	291.336	312.591	443.113	371.877	362.737	200	296.797	237.64	485.891	424.98	509.619	487.739	470.073	468.714	402.812	311.879
Peak_01808	7.09869	270.281	3295.79	4117.32	2859.62	3486.61	2782.28	2750.58	2767.68	5642.93	3141.74	3600.45	2930.37	6454.3	3639.04	4118.93	4321.94	3005.75	1568.44	2001.08	3337.05	1945.23	3380.47	2387.16	2753.94	2260.29	5073.74	1297.65	550.316	2602.74	3369.89	4146.6	4412.87	4411.78	2498.64	3003.38	4063.12	3590.93	2672.13	4239.89	3445.41	3208.28	3193.64	4394.4	3885.77	4763.17	2272.55	3858.61	2869.05
Peak_01813	0.558667	270.947	688.621	653.349	512.547	675.37	200	667.744	395.341	730.171	817.112	656.878	669.493	1019.53	894.945	736.986	739.297	622.203	762.991	518.548	542.095	566.914	661.043	200	661.873	770.881	1023.86	963.449	1151.96	842.691	851.406	903.794	972.399	1115.79	689.45	626.005	720.634	720.76	742.915	641.074	674.659	812.706	828.99	830.339	1088.24	1113.14	1096.89	979.785	976.184
Peak_01814	0.674908	270.982	509.773	571.679	417.985	533.829	722.13	534.011	849.978	529.383	408.66	497.721	271.604	354.276	627.71	409.395	315.965	267.163	581.176	577.552	449.148	491.162	640.616	457.128	425.436	733.757	261.524	284.62	224.47	268.194	406.03	292.568	285.371	293.736	170.533	395.102	180.943	325.111	485.764	467.065	366.455	449.13	186.758	239.602	284.171	155.393	225.574	358.475	355.734
Peak_01815	0.780457	271.039	122.595	238.351	133.776	126.588	523.96	241.866	660.934	373.858	192.222	140.998	201.966	200	318.801	284.351	11.1026	200	236.298	314.14	269.847	200	336.581	200	282.447	200	220.428	394.941	341.918	230.059	123.296	341.224	416.924	265.173	92.1137	228.278	226.894	319.431	272.747	180.038	159.584	275.445	366.14	342.857	611.811	504.397	614.668	487.753	407.418
Peak_01817	4.12281	271.061	3061.32	3547.02	2990.84	2629.27	3120.35	3137.14	2564.48	3340.18	2704.34	2861.67	3043.79	4306.64	3405.08	2990.8	2780.99	2129.41	2110.9	1841.46	2525.91	2371.92	2954.53	1356.64	3810.82	2631.36	3870	7241.85	6135.72	4177.95	2948.87	3438.94	3303.1	4337.07	4060.48	4409.05	4511.16	4122.07	2510.42	3419.76	4097.46	3400.62	2848.33	2780	4206.09	3501.53	3030.84	2454.3	2715
Peak_01820	0.730278	271.071	969.752	1472.81	1442.79	838.576	1076.14	1762.82	1345.26	1250.81	2046.89	1934.66	2273.68	3685.66	2057.14	2780.64	930.652	381.47	930.989	1219.76	1922.05	817.501	1678.27	1120.15	1860.48	1567.17	3433.05	3901.17	3665.03	3715.33	2723.51	2040.98	4129.33	5133.28	1217.99	2079.82	2931.85	1512.77	2464.97	2130.04	2065.9	3079.12	3487.04	4075.98	5429.28	4923.42	4024.61	4729.29	5125.8
Peak_01827	4.89492	271.189	810.738	867.067	564.188	719.912	1347.84	879.676	771.574	760.519	910.832	912.592	678.612	1123.09	795.404	1023.02	571.163	1127.64	1018.2	597.651	562.064	784.657	709.596	749.651	843.051	775.817	906.079	746.59	922.342	748.521	1013.99	791.554	725.849	692.791	804.732	883.938	812.398	720.427	961.963	862.874	897.413	877.436	887.365	663.308	972.192	1011.57	809.112	862.423	1113.35
Peak_01831	7.13249	271.276	7923.51	9141.59	6651.41	9192.71	7728.91	5992.04	7947.75	4867.3	6289.48	7559.91	6802.89	9238.85	6384.17	8494.31	8809.95	6526.8	3415.51	4573.44	7588.63	3829.53	7497.8	5067.82	7140.94	5754.69	9596.2	2887.47	1549.55	4722.97	5764.41	8431.41	9405.35	8525.91	6074.55	7336.44	8486.87	9174.08	5506.59	8791.57	7299.5	7842.11	7136.07	8475.89	7609.79	9968.63	8076.32	8131.56	6970.58
Peak_01833	0.763696	271.568	211.157	481.459	424.188	200	323.796	506.068	418.964	370.051	675.418	601.844	670.029	1163.62	462.956	897.473	276.62	200	303.633	698.415	559.935	200	540.958	200	548.612	200	1007.88	1406.33	1402.14	984.948	888.52	531.362	1076.08	1630.47	411.667	643.959	905.954	449.551	802.892	683.64	628.986	1010.25	937.242	1250.57	1702.79	1562.77	1228.86	1474.13	1842.37
Peak_01836	0.730278	272.071	475.548	477.014	420.794	389.792	420.798	508.741	608.021	372.111	483.428	467.141	667.379	978.79	482.445	713.099	341.463	200	447.4	598.909	356.753	315.974	558.755	200	564.568	380.191	743.939	888.213	845.927	885.288	620.462	607.289	884.326	1193.04	374.381	478.29	704.305	452.657	733.579	573.316	594.796	801.761	838.445	901.286	1172.14	1255.58	857.183	1231.67	1083.67
Peak_01837	4.15622	272.064	491.687	517.467	466.972	315.465	768.341	400.651	278.294	485.217	510.759	277.579	434.801	690.533	460.152	438.915	273.187	200	424.487	200	482.944	474.447	370.116	200	631.366	295.722	553.97	974.877	875.087	487.05	483.755	510.308	453.37	679.737	472.879	615.518	742.606	563.287	214.903	505.624	580.885	722.626	393.163	385.914	525.427	495.877	477.711	322.857	347.447
Peak_01842	7.18297	272.279	1297.09	1385.99	1118.89	1470.36	1502.86	1054.62	1398.55	772.621	1185.06	1264.08	1087.4	1967.82	1099.59	1499.07	1617.01	1280.43	1009.1	1237.56	1347.32	1458.78	1304.83	1126.92	1168.74	852.482	1578.33	459.317	309.273	766.775	1249.62	1487.76	1544.86	1410.84	1009.91	1215.77	1388.81	1432.3	1017.68	1343.98	1287.26	1499.2	1288.07	1262.09	1351.56	1700.15	1354.6	1324.58	1637.11
Peak_01845	0.570455	272.951	363.692	185.447	200	312.692	200	200	300.094	412.709	512.857	474.778	443.66	531.842	468.653	501.236	334.304	200	129.824	343.197	469.144	200	309.302	200	294.252	200	590.405	604.13	687.782	581.953	487.918	688.304	580.761	674.764	364.081	322.84	311.34	200	349.1	316.142	428.984	477.584	692.133	483.806	679.157	660.492	762.936	698.834	631.325
Peak_01852	0.631247	273.083	13996.5	12299.2	14328.6	12219.2	7857.38	13339.3	11769.1	12523.1	18162.9	14728.7	16487.2	20931.5	14305.2	12079.8	12296.1	4176.25	12671.7	10542.8	11808.4	6883.97	11981.4	3482.34	12275.6	8377.14	20412.6	20619.3	23075.9	20501.2	15903.6	15587.1	16737.3	17906.9	12367.7	12234.9	14713.8	14544	15296.2	10646.2	10803.2	13905.5	22736.2	18382.7	23499.4	20701.7	19365.7	16679.7	20013.1
Peak_01855	0.697057	273.107	821.951	678.41	677.582	628.557	209.136	762.035	706.055	789.521	857.077	706.827	818.922	1182.19	665.737	575.939	659.129	200	602.823	410.04	532.657	422.994	614.508	138.315	812.977	533.604	1324.35	1195.22	1312.52	1060.29	666.52	725.391	1006.84	1009.45	1022.77	663.019	646.347	978.398	882.565	654.199	747.381	785.942	1518.17	1271.26	1170.04	1303.22	905.573	739.071	817.918
Peak_01856	0.847468	273.106	477.644	322.207	300.567	313.705	143.656	503.028	370.377	250.679	346.164	189.117	358.036	477.729	198.302	275.404	271.79	200	196.879	204.458	275.559	206.984	253.11	108.68	296.868	222.721	693.21	534.531	502.804	364.369	264.528	375.653	463.806	333.878	451.705	266.187	255.61	496.475	286.938	200.519	434.719	314.721	499.071	312.006	406.192	512.439	322.837	214.479	275.649
Peak_01858	3.37908	273.168	350.732	595.453	200	612.425	567.077	489.888	554.516	533.958	591.6	695.779	567.843	628.175	625.482	621.086	801.119	697.19	545.089	688.714	200	412.672	484.56	451.664	481.446	200	570.692	448.642	227.282	558.583	603.98	646.105	568.414	433.89	488.457	552.529	461.3	392.474	294.771	508.477	518.237	566.645	681.882	565.073	832.684	663.943	689.4	468.784	738.823
Peak_01860	-0.0331044	273.185	874.27	1070.69	736.575	200	805.475	1320.7	877.715	930.318	1020.29	825.317	1037.76	200	1076.85	1012.6	200	200	986.195	755.426	936.894	761.045	1064.63	200	870.931	902.174	901.153	1042.47	1135.71	714.764	914.52	200	200	200	200	891.863	881.054	934.23	1027.45	200	580.734	1043.9	200	1018.13	923.18	644.911	874.138	1050.29	862.239
Peak_01865	0.640272	273.585	4351.79	3721.8	4155.75	3890.28	2356.14	3893.68	3700.66	3716.98	5954.24	4218.34	5404.53	6783.56	4402.82	3761.6	3752.25	1250.4	3361.62	3195.59	3425.99	2276.53	3915	1809.01	3977.72	2611.78	7022.43	7288.2	7173.05	6075.97	5487.49	5033.03	5327.66	6209.27	3981.03	3996.4	4369.01	4795.56	5055.57	3278.7	3735.41	4363.47	7839.58	6119.38	7718.39	6843.31	6319.53	5469.19	6471.22
Peak_01867	0.713649	274.06	386.315	321.907	366.578	263.972	339.313	218.071	406.261	286.94	244.629	106.274	186.069	150.705	256.3	126.241	200	200	115.276	281.987	278.934	152.146	333.26	200	278.309	327.011	240.177	256.184	150.874	191.91	308.297	107.457	59.6076	190.66	228.441	191.005	251.103	197.361	311.452	151.007	283.965	337.751	284.452	193.439	324.05	194.412	300.39	260.023	314.098
Peak_01869	0.640272	274.084	2980.29	2934.42	3031.5	2765.17	1635.52	2386.2	2446.58	2531.18	3501.99	3139.56	3476.58	4410.17	3433.5	2404.96	2608.72	774.513	2578.91	2226.55	2463.08	1396.7	2415.57	1444.7	2610.09	1731.76	4384.53	4456.12	4607.6	4046.13	3604.35	3145.87	3399.31	4202.97	2599.97	2724.82	3350.44	2742.41	3128.08	2002.31	2475.72	2754.23	4796.78	4026.46	5177.07	4514.53	3979.33	3357.59	4397.02
Peak_01871	4.92848	274.275	389.613	443.04	200	354.876	200	360.446	541.919	488.341	249.696	451.549	505.76	439.442	582.732	397.941	323.979	414.263	200	256.372	200	200	200	200	390.707	435.002	296.172	439.431	488.377	295.9	533.255	300.566	291.11	324.836	366.707	381.07	417.507	352.792	518.492	681.476	341.709	565.934	514.974	368.057	440.634	399.58	402.616	399.268	450.08
Peak_01872	0.66493	274.585	667.236	685.299	590.72	550.141	412.483	567.596	600.263	653.995	716.689	522.967	571.772	960.382	573.931	475.933	493.049	200	589.651	755.064	544.37	356.721	639.835	200	638.751	539.183	1015.98	1160.48	1110.36	869.709	746.971	750.72	836.15	822.731	632.056	750.595	630.972	750.673	781.571	586.358	515.57	653.821	1052.54	908.35	1258.53	1107.48	873.191	779.272	877.178
Peak_01876	0.697057	275.06	602.835	577.372	480.547	535.34	355.187	499.906	573.764	496.297	657.111	600.085	703.318	927.703	786.416	550.91	529.381	248.473	450.596	489.533	487.161	372.543	553.026	227.278	501.469	387.572	811.931	934.467	1046.33	957.728	750.466	702.68	849.219	871.031	415.818	525.909	485.359	560.012	652.299	480.855	464.251	498.866	1068.69	841.015	1058.31	835.084	1073.32	794.49	648.907
Peak_01877	3.63932	275.053	681.489	631.847	512.742	976.615	786.684	424.051	447.84	589.487	866.096	1050.33	826.22	1223.44	871.604	751.899	954.922	824.825	457.32	426.637	200	468.223	448.823	576.065	484.834	200	1046.56	351.06	275.109	878.242	520.156	740.776	918.511	911.623	631.171	806.961	538.232	710.225	753.642	741.989	578.418	704.345	955.532	737.87	1330.3	1043.35	827.587	698.474	825.185
Peak_01878	0.713649	275.083	159.787	256.208	200	170.068	1.63837	173.642	200	171.986	165.944	351.26	175.254	310.484	196.623	140.66	200	200	190.666	391.268	159.87	200	246.654	200	164.547	64.6721	309.683	239.24	306.466	281.203	262.48	135.224	246.649	169.822	234.826	119.291	212.742	261.856	227.675	200	285.006	167.593	387.752	230.029	295.885	176.545	208.637	138.511	417.391
Peak_01879	3.9885	275.093	13553.2	11891.3	13523.9	12660.5	15679.2	12572.9	11014.4	14244.4	4361.42	3708.42	5285.93	6701.41	4789.52	4749.33	5046.68	4443.57	7294.11	8742.07	13003.6	9584.85	11497.9	7347.53	13358.1	10218.2	6898.49	6549.77	7418.54	8342.24	7813.1	6664.01	7761.32	8661.15	13177.2	13984.8	12955.8	14799	11921	12164.6	14167.1	14649.7	3656.35	3385.9	4908.46	5651.94	3934.56	3512.66	5631.61
Peak_01882	4.02207	275.11	1407.2	1398.78	1409.98	1461.62	1157.84	1426.67	1302.3	1409.79	442.193	315.439	530.735	661.425	473.267	566.169	492.927	421.868	705.301	792.5	1162.76	863.612	1228.05	532.736	1748.57	895.943	918.961	651.605	703.339	793.477	621.074	1055.9	927.027	996.374	1690.3	1478.52	1162.26	1793.1	1483.45	1660.29	2041.45	1475.25	405.023	331.533	360.734	614.431	421.192	248.011	352.937
Peak_01883	0.713649	275.125	2876.64	2654.25	2662.03	2197.88	2287.22	2605.85	2403.55	2203.7	1187.78	912.263	1051.81	1591.9	935.717	762.539	758.114	280.745	2447.25	2468.43	2502.82	1689.95	1828.64	1740.99	2777.98	1956.91	1374.49	1074.17	1118.65	1646.96	1349.28	1459.06	1260.59	1247.05	3172.55	3067.12	2865.42	3480.6	2299.93	2520.12	2804.23	2609.85	1110.58	771.288	965.812	1150.23	699.744	999.457	985.07
Peak_01893	4.22323	276.074	405.302	363.552	448.995	398.927	564.333	373.356	511.089	200	520.233	670.296	668.125	615.949	625.727	367.161	461.268	567.954	278.171	200	353.114	200	421.516	362.882	258.653	222.606	564.299	622.58	448.319	680.765	518.258	530.986	480.586	299.965	247.846	352.636	395.378	200	377.389	416.616	370.831	200	668.498	419.784	679.954	530.624	412.735	480.553	618.926
Peak_01894	4.00529	276.096	2299.25	1954.69	2268.54	1986.24	2222.62	2491.84	1951.47	2199.34	574.973	594.536	902.958	1033.79	821.138	944.539	819.094	646.419	981.957	1353.9	1854.56	1467.91	1717.8	1575.37	2325.46	1819.91	1369.13	1109.95	1299.26	1461.62	1184.38	1063.71	1285.07	1458.14	2228.68	2201.93	2451.61	2395.14	2090.63	2095.71	2431.99	2475.32	634.723	497.5	874.219	997.194	624.654	592.455	858.63
Peak_01895	0.746939	276.121	344.117	359.516	347.059	285.046	438.407	385.799	429.583	306.274	192.708	225.087	230.366	376.017	200	180.224	278.077	200	284.078	421.215	364.99	341.306	218.771	200	377.309	217.381	275.541	283.641	220.984	284.905	285.289	283.129	274.478	219.643	432.966	474.366	419.431	479.444	278.125	300.398	330.457	357.305	378.622	242.085	217.893	197.922	207.612	290.236	56.8955
Peak_01899	0.640272	277.031	645.338	830.536	684.397	692.821	402.863	706.665	859.151	764.267	602.264	672.505	738.425	702.379	816.377	615.502	452.327	297.574	687.374	667.872	861.991	868.214	633.454	408.695	598.18	823.607	578.767	633.157	651.342	676.527	567.88	528.442	617.855	624.805	605.189	699.092	862.574	930.884	698.1	674.456	691.374	753.101	630.751	562.06	845.614	730.172	670.591	816.809	657.15
Peak_01900	0.631247	277.066	720.43	436.781	703.591	532.248	608.697	668.277	786.853	639.577	1820.34	1229.71	1849.51	1588.97	2207.94	2315	2285.68	1118.99	467.069	489.865	640.207	824.592	927.76	271.277	644.171	1379.26	1289.62	7369.69	17123.5	1098.02	1992.28	1600.1	1544.6	1650.51	550.105	568.912	478.901	654.623	680.948	550.141	676.005	853.113	1695.08	1316.41	2430.43	1770.2	3046.99	2565.57	1593.23
Peak_01904	0.746939	277.091	118.583	163.858	152.706	212.267	200	180.454	131.322	271.813	222.424	198.529	179.364	238.652	201.481	223.551	238.903	200	200	200	233.171	200	200	200	200	226.66	190.713	359.64	651.778	222.545	173.569	205.385	237.591	195.919	144.581	154.359	166.123	204.439	200	114.737	179.151	169.51	277.528	189.834	248.771	308.68	246.308	281.265	120.296
Peak_01907	2.11902	277.129	799.367	525.558	608.501	579.626	930.16	630.614	481.23	593.358	758.806	527.433	1094.05	1001.4	1204.79	795.287	897.613	667.083	591.067	683.596	508.543	474.196	898.307	300.342	715.292	591.996	818.395	1636.18	1485.54	528.258	908.09	786.36	978.346	1054.32	791.255	829.17	705.983	983.133	994.142	672.379	1002.39	943.136	734.894	885.302	1556.56	960.05	1045.67	954.672	928.341
Peak_01916	-0.0909927	277.253	1091.54	1372.61	1263.64	920.404	949.377	1365.71	1205.96	1639.04	1531.65	1386.93	1283.6	1434.68	1612.78	1232.55	1139.31	1400.95	1007.71	1407.36	1157.31	1319.33	1234.26	1341.79	1391.5	957.856	1158.65	1324.93	1576.15	1336.76	1665.72	1417.6	1190.76	1207.45	1149.47	1379.13	1360.09	1352.69	1459.12	1259.56	966.208	1554.88	1079.09	1278.08	1668.44	1123.87	1223.84	1287.06	1049.9
Peak_01917	0.697057	278.066	103.309	200	200	200	200	166.962	163.047	200	186.993	200	221.13	286.657	218.122	224.886	223.077	200	200	131.595	200	200	64.4554	200	200	261.252	188.955	924.613	2187.36	244.562	220.027	194.214	222.696	396.678	200	93.9202	185.632	148.967	256.288	196.182	35.7759	244.349	196.89	297.393	202.948	243.22	333.851	386.058	338.601
Peak_01922	0.640272	279.053	1804.22	2103.66	2006.47	2078.95	1591.62	2068.75	2488.84	2039.21	2444.27	2312.47	2178.82	2383.82	2221.39	2129.95	2287.59	1130.34	1810.51	2082.89	2383.4	1195.97	2052.29	804.646	2230.86	1524.79	2723.39	4015.18	4372.7	2522.8	2382.14	2580.98	2876.1	2753.36	2433.61	2948.01	2863.14	2949.43	2859.36	2319.73	2424.26	2763.5	3306.85	2669.1	3454.96	3026.83	3252.1	2501.84	2442.95
Peak_01923	3.73886	279.068	901.374	1225.05	876.634	1015.78	1197.89	1071.52	961.291	1039.09	610.513	1059.06	1097.69	901.785	1090.15	996.523	886.423	1159.89	1141.05	1067.6	638.664	717.543	951.109	667.175	1056.59	966.014	911.161	562.858	796.894	780.864	699.989	953.63	854.09	586.219	780.485	1004.35	1036.82	944.478	988.521	1060.39	891.327	1195.13	957.377	699.999	1308.83	808.312	864.537	461.718	664.916
Peak_01925	0.66493	279.083	11516.8	12447	11522.8	12244.1	7675.84	11500.8	12701.3	11292.3	18249.6	16565.2	19602.4	23504.9	16653.2	15178.8	14222.7	5545.48	10929.8	10032.3	11922.3	7255.25	11558.2	3266.6	12941.4	8508.72	19561.5	26939.4	25982.3	23584.7	19328.3	19376.6	19577.7	22240.3	10130.3	12212.8	14440.8	12293.4	14036.9	10775.8	12254.4	14364.1	21840.8	21180.6	27568	25509.5	22902.8	24617.4	23733
Peak_01930	3.78724	279.102	620.238	200	385.145	417.409	369.692	200	370.904	384.129	181.321	244.245	312.409	447.33	200	301.834	221.18	276.782	300.65	544.277	294.452	568.124	482.887	470.653	472.712	426.482	262.192	398.654	200	339.075	160.039	287.909	381.824	492.486	449.239	348.623	200	372.388	287.74	341.997	444.905	471.089	220.596	200	333.239	297.158	200	200	421.025
Peak_01932	0.913642	279.105	145.985	145.424	192.778	157.599	97.6439	200.226	242.095	118.046	281.782	245.939	466.976	420.904	241.686	231.669	246.575	2.07124	93.6624	90.0766	181.354	24.6354	145.145	200	208.627	109.028	349.949	397.618	465.143	380.532	191.876	552.129	367.528	326.545	163.599	299.549	226.49	279.524	218.675	130.29	246.242	219.426	551.122	355.05	304.203	524.817	337.56	273.194	272.974
Peak_01933	3.47935	279.123	561.716	564.619	464.033	579.801	635.962	496.477	638.187	547.05	502.991	451.889	578.093	504.067	200	405.955	299.253	569.287	569.455	829.677	200	603.952	601.394	410.355	477.732	473.61	500.874	499.262	434.354	536.393	596.291	475.416	462.559	398.415	434.744	646.819	451.963	609.166	200	677.818	487.963	468.675	403.981	394.969	459.685	462.724	367.1	200	335.969
Peak_01934	0.713649	279.133	200	161.073	120.022	164.976	200	176.022	203.521	174.019	212.9	302.732	191.319	335.938	123.135	193.474	133.815	200	200	200	109.506	200	248.314	200	136.005	200	261.173	316.106	286.039	242.138	233.349	211.111	246.931	306.136	203.844	183.964	250.401	198.33	129.004	153.214	189.932	155.212	361.646	258.303	412.621	272.277	293.312	231.871	232.589
Peak_01935	2.47803	279.146	25579.3	20907.3	17667.5	19611.1	26212.7	20668.4	18979.4	20182.5	21428.6	23517.1	31509.3	28671.8	30073.3	24482.6	28116.7	18086.6	14662.5	18822.3	16336.6	14637.6	27296.2	10076	21082.4	17985	30319.2	25082	23331	24523.2	26127.6	26421.7	30992.6	31614.1	28902.9	23463.7	25344.5	28764.1	31256.5	23879.7	30319.8	30440.8	26745.1	34639.1	51644.4	39362.8	38949.7	34671.3	33438.9
Peak_01936	6.25847	279.16	582.993	564.646	545.146	501.427	702.09	356.461	369.04	532.471	443.164	506.473	511.695	598.97	599.647	598.844	531.536	200	388.53	402.561	552.638	422.468	526.861	746.732	454.492	379.575	487.782	598.018	833.001	362.299	525.14	413.642	653.239	492.558	446.344	485.515	397.736	421.736	582.914	662.977	424.459	425.583	372.395	349.44	577.106	631.776	454.74	431.071	543.286
Peak_01937	7.70301	279.16	682.526	565.74	670.13	200	1017.06	443.213	404.994	591.201	2715.39	3185.66	2914.41	1903.53	2376.03	1968.27	1195.84	925.811	200	200	200	200	200	626.226	200	200	1671.63	2888.32	2365.2	624.703	1179.52	1428.09	1318.99	401.939	200	200	200	200	200	200	10274	200	1870.39	1030.25	1875.11	2571.46	1853.17	706.128	1045.64
Peak_01940	2.54452	279.199	164.909	200	200	124.475	185.684	122.179	143.473	200	233.405	143.033	175.416	176.016	175.326	124.424	203.491	127.45	200	200	186.138	184.276	159.275	200	95.9604	75.5428	196.194	205.435	157.699	135.464	165.499	167.591	272.855	230.879	176.132	119.552	203.133	194.648	240.577	106.47	196.507	193.491	178.97	287.049	400.515	271.416	361.397	194.506	230.819
Peak_01945	0.746939	279.563	390.216	510.576	486.503	331.544	428.207	481.742	518.126	327.989	472.345	309.58	536.452	870.829	353.91	430.773	714.918	200	397.649	407.256	418.719	431.765	354.394	200	469.386	113.256	724.971	1319.67	1126.65	856.21	634.501	824.298	920.981	808.073	383.922	459.555	607.828	614.652	539.606	353.838	399.402	548.965	838.276	705.658	960.769	847.726	891.829	758.892	781.283
Peak_01947	0.697057	279.585	3435.22	4344.98	3843.47	3966.49	2738.82	3391.09	4352.05	3695.95	5809.16	5030.71	6096.28	8282.29	5041.82	5033.85	4889.12	1972.86	3548.34	3321.83	3567.11	2123.42	3858.23	2436.93	4301.83	2621.25	6594.01	9029.05	8588.15	7233.38	6332.3	6496.8	6528.31	7061.98	3566.09	3975.46	4821.1	4202.69	4858.11	3829.55	4105.85	4790.27	7765.51	7057.25	9598.79	8375.49	8003.72	8059.17	7887.42
Peak_01949	0.697057	280.06	519.682	626.208	521.647	335.212	455.401	581.312	527.774	532.264	579.416	444.404	573.413	788.275	563.328	575.397	410.97	83.6881	412.415	349.718	492.586	235.877	611.08	177.622	615.41	303.953	691.755	1016.39	1145.55	695.167	488.18	656.764	677.639	776.67	655.556	551.136	725.715	557.78	735.074	428.636	550.442	512.162	787.27	676.644	946.562	862.841	914.918	685.252	652.368
Peak_01950	0.697057	280.083	2665.75	2932.35	2694.65	2518.08	1701.86	2408.47	2994.95	2382.81	3726.06	3271.11	4155.78	5100.96	3365.43	3583.9	3204.27	1354.93	2739.11	2046.99	2536.97	1459.78	2391.39	1441.91	2664.6	1933.49	4309.94	5367.55	5492.32	4791.31	3961.65	3739.07	4098.07	4821	2503.26	2919.94	3255.99	2639.61	3254.62	2452.41	2565.44	3089.24	4888.87	4473.27	5574.33	5093.34	4640.65	5469.87	4889.14
Peak_01951	2.51112	280.149	2959.53	2451.74	2684.78	2549.77	3880.92	2674.23	2549.19	2562.84	2686.31	2844.35	4172.78	4017.74	4241.45	3222.29	3635.21	2573.7	1993.42	2889.16	2359.67	2105.52	3852.3	1462.52	2648.41	2233.52	3573.1	3471.76	3135.19	2934.4	3819.79	3004.09	4205.43	3952.79	3642.93	3273.22	3231.4	3626.97	4246.86	3140.37	4087.34	4154.03	3303.07	3875.16	6821.03	4835.57	5361.21	4676.58	4763.44
Peak_01956	6.82959	280.265	1568.71	1913.44	493.544	766.124	1899.01	809.125	2469.21	10177.4	719.927	587.216	1255.64	499.845	4320.63	945.249	218.529	200	423.107	418.798	227.71	200	547.713	705.833	630.951	322.047	781.791	1916.79	2316.67	200	714.949	577.322	605.678	402.455	3373.16	580.906	508.719	2698.76	1987.34	671.908	678.515	687.17	1363.87	581.777	551.01	588.793	3258.58	347.147	666.671
Peak_01957	0.713649	280.583	469.641	530.359	515.095	576.904	450.493	575.467	664.868	456.054	872.927	589.823	888.37	993.044	679.676	622.22	631.873	233.134	365.445	551.684	481.946	391.862	521.434	200	475.239	385.788	989.426	1263.27	1179.9	934.207	788.601	863.62	773.857	1140.81	422.168	613.124	637.496	629.48	587.042	694.408	421.449	616.768	1170.5	870.891	1323.8	1110.04	1078.42	962.39	899.431
Peak_01960	0.763696	281.049	191.468	81.8962	150.758	200	200	129.07	86.6905	200	172.423	200	145.67	47.8909	200	159.614	5.44144	200	200	200	123.575	200	128.973	200	79.9545	92.8759	120.68	98.4092	261.93	120.776	200	200	79.7132	130.661	78.8225	154.128	53.6554	126.354	111.393	89.8724	200	167.483	100.356	50.4508	200	30.4072	177.252	107.4	108.703
Peak_01961	0.640272	281.074	5007.56	4761.12	4656.81	3440.45	2801.86	5299.21	4040	4436.33	4243.66	3914.5	4034.38	4127.77	3775.36	2657.44	2734.84	834.878	3393.42	3153.56	4777.72	1458.25	4549.14	1975.85	4098.26	1976.95	5403.66	5735.92	6319.67	3804.26	3200.03	2942.84	2930.63	3495.98	4706.07	4417.75	5709.62	3863.56	5438.75	2951.67	3264.81	4132.16	6430.44	5446.87	6428.32	5996.47	6360.49	4051.46	4418.98
Peak_01965	2.51112	281.156	498.937	556.653	403.749	388.539	526.153	534.069	340.338	537.251	538.695	671.463	798.403	664.47	1018.61	643.663	610.004	418.021	531.362	408.515	316.922	422.973	477.32	319.829	487.053	342.743	742.749	598.276	489.603	613.009	735.128	599.342	632.401	830.897	647.999	624.832	583.2	732.163	602.77	680.11	664.323	770.079	671.154	761.357	1186.66	998.056	1239.12	789.024	786.963
Peak_01972	0.640272	281.575	1100.23	968.784	1019.31	597.491	638.374	999.807	805.016	741.575	898.129	694.013	981.304	703.41	868.236	516.486	518.226	200	824.633	583.013	992.408	578.924	825.128	434.58	739.65	472.423	979.158	1269.58	1429.65	800.575	776.041	648.253	633.532	647.201	1029.21	857.535	1197.76	742.718	1073.74	663.545	568.198	883.264	1404.35	1127.24	1515.17	1066.02	1179.34	945.21	1071.18
Peak_01976	0.640272	282.086	2246.09	1662.79	2091.06	1868.28	1244.16	1322.6	1221.66	1382.19	2656.44	2082.41	1717.76	2103.52	1544.17	905.927	1157.72	200	1385.23	1097.44	1294.03	621.546	1265.11	679.128	1088.39	990.716	2357.58	1449.44	1996.07	2354.16	1913.44	1133.84	1229.12	1387.03	1608.69	1045.61	1591.27	1462.9	1869.39	636.529	1059.1	1244.02	2541.46	2021.29	2255.46	2047.59	1369.79	1117.72	1584.41
Peak_01981	6.98086	282.223	2313.26	2395.83	1731.89	2460.55	2279.24	1633.89	2858.54	2023.92	1383.46	1877.98	1822.55	2948.2	2734.92	2758.81	2327.33	1677.46	1709.66	1256.5	1556.59	1006.66	1848.31	1227.63	2117.79	1394.25	2486.11	1880.46	910.645	1572.83	1885.31	2602.67	2879.55	2699.77	2093.5	2368	2437.85	2678.84	1985.75	2377.52	2247.29	1942.3	2399.22	1990.77	2686.01	2775.97	2510.38	1979.42	1793.53
Peak_01982	7.19987	282.282	143900	179978	48418.3	93080.9	166367	65977.7	234456	671833	61621.1	66481	113413	50195.8	418189	100346	37160.3	27043.8	28560.4	34408.4	30371.9	22980.7	58428	43672.9	105782	52248.4	80174.9	96011.7	112680	26266.9	66019.8	56763.8	67506	36512	297456	58885.5	57281.6	178653	138896	72756.1	66908.3	73152.1	134761	54040	58594.4	51365	327472	49632.8	69326.6
Peak_01985	0.66493	282.588	700.039	705.393	731.317	614.378	200	469.371	399.213	482.851	829.408	655.371	703.284	709.052	519.568	236.796	280.004	200	349.959	618.092	334.323	200	332.327	200	387.405	200	751.413	561.81	491.857	782.986	618.731	444.218	347.854	372.909	465.168	406.133	476.506	482.271	818.358	290.711	339.93	445.509	856.467	690.738	848.346	627.886	411.59	499.513	525.374
Peak_01992	3.2281	283.084	3336.7	3199.7	3042.72	3204.09	3605.98	3935.67	3698.87	3879.61	2394.68	2342.12	2762.23	2863.19	2817.27	2308.96	2553.85	2139.26	2305.8	3385.82	4003.38	2718.86	3575.74	2142.36	3507.35	3269.99	2750.26	2889.28	3026.62	2948.99	2842.38	2661.67	2794	2955.37	3402.52	4025.92	3733.41	3795.81	3892.86	3449.08	3551.13	4131.25	2165.6	2580.06	2989.73	2614.27	2839.03	2431.69	2956.05
Peak_01993	3.77045	283.082	2876.85	3087.94	2808.51	3035.44	3755.72	3011.12	2984.71	2846	1838.51	3004.52	2155.43	2717.69	2587.69	2338.64	2303.14	1938.48	1825.57	1801.31	2382.06	2234.62	2801.64	1718.44	2816.77	2665.2	2400.13	2480.47	2278.43	2564.71	1718.42	1996.77	2465.02	2052.88	2865.13	3167.87	2493.49	2936.16	3220.92	2914.97	2764.67	3613.9	2008.08	1819.81	2904.56	2118.76	1948.4	1743.1	1636.9
Peak_01997	-0.0765271	283.176	2716.2	2656.42	2648.76	1651.22	2336.3	3121.67	2893.03	1755.15	3242.36	2815.52	2511.99	2778.98	3408.64	2950.98	2200.39	2080.07	2180.81	2226.74	2146.49	2611.65	2408.87	1364.66	3100.72	2339.13	2333.66	2875.66	2206.63	2775.32	2857.95	2783.31	3116.83	2682.64	2616.8	2701.89	2551.09	3070.8	3057.62	2881.9	2238.76	2601.84	2356.26	2662.54	2770.5	2114.73	2904.87	2794.62	1779.96
Peak_01998	2.72613	283.177	322.252	286.942	200	228.442	245.739	200	409.564	200	413.294	200	261.968	337.28	415.876	200	371.997	319.626	200	2744.96	1616.29	200	336.288	200	1125.68	8329.87	706.699	38770.8	63742	502.556	551.274	558.034	448.101	269.329	200	200	420.717	200	308.999	263.211	200	421.713	401.174	200	483.078	508.287	481.97	321.188	616.737
Peak_02004	6.47658	283.225	491.222	614.48	411.53	487.864	553.355	467.561	200	364.53	533.132	427.5	356.602	252.45	462.004	505.762	334.533	306.427	200	200	410.476	489.205	458.115	666.382	313.845	200	475.183	200	200	200	363.196	398.801	514.891	489.029	377.339	368.9	518.453	384.078	403.583	406.568	371.19	525.368	436.16	334.186	493.229	376.373	411.615	415.872	461.459
Peak_02005	7.18297	283.226	559.646	578.114	447.476	641.626	390.202	414.003	641.47	491.852	376.321	296.789	347.493	683.677	589.561	587.254	498.087	233.044	291.546	225.846	307.869	200	328.68	474.042	490.287	614.74	617	436.026	200	368.945	390.169	468.939	625.884	512.134	413.176	549.56	508.003	609.599	597.992	582.13	449.579	408.298	637.273	689.889	627.632	639.697	612.628	480.06	447.232
Peak_02008	7.21681	283.284	26473.8	31334.9	10419.1	17173.3	39416.5	12346.2	45219.1	116019	12236.9	12196.8	22757.8	11097.3	70579.8	20381	7933.12	5708.97	6827.89	7980.8	5890.13	5549.16	11347.4	10481.6	19401.1	9161.93	14338.7	18690.9	22249.1	4945.35	15280.5	11127.6	13061.7	6974.22	56912.3	12455.3	10041.1	32860.6	28841.8	14164.8	12710.7	14781.5	25073	9472.66	12214.7	8970.92	60004.4	9661.36	16803.2
Peak_02009	-0.0909927	283.3	659.981	1199.35	850.681	725.664	973.731	1078.61	626.047	200	994.385	892.204	779.735	903.885	1048.18	766.098	1070.97	200	686.839	757.071	577.153	885.53	965.002	200	768.968	578.021	868.913	612.718	723.383	1030.28	1147.07	857.979	921.113	900.085	780.048	825.331	894.206	861.281	941.299	922.457	695.37	913.796	1121.45	1039.71	856.542	669.502	948.981	1053.25	974.885
Peak_02013	4.15622	284.064	6147.53	7014.25	6012.06	7476.24	8045.87	5604.94	8099.22	6082.64	8090.86	8367.41	6990.41	8910.73	9811.08	8284.41	8907.23	6549.28	7138.03	3460.28	4453.17	3846.36	7678.96	6309.02	6448.13	5016.41	7698.01	8806.48	7241.69	6349.06	7507.46	8839.92	8680.12	6121.21	5935.04	7015.69	7224.08	5692.81	6163.88	6800.57	5980.7	7740.82	8604.54	7577.49	8944.51	7958.45	8832.89	8948.09	8442.27
Peak_02015	3.26168	284.085	424.488	511.134	471.446	412.966	495.904	482.607	536.094	518.017	258.566	341.682	392.837	488.269	200	213.75	200	350.242	560.698	428.427	479.182	200	498.636	476.154	464.749	398.02	463.333	279.312	229.972	347.013	200	323.654	373.868	382.039	530.809	567.498	618.599	615.309	496.146	407.503	465.798	477.807	366.017	203.619	437.981	346.112	339.324	403.134	370.58
Peak_02017	4.32389	284.079	773.908	1026.82	822.126	963.135	794.187	626.592	1017.49	767.759	925.489	873.451	661.865	1119.92	1081.25	1055.59	1118.94	567.131	755.544	248.846	397.674	295.395	863.832	778.45	790.374	668.243	1102.38	1365.49	790.562	773.982	753.67	1004.11	1169.85	830.521	739.06	830.077	970.637	849.547	609.847	901.26	635.545	1067.51	1350.74	1123.7	1112.46	1080.14	1175.61	930.144	983.111
Peak_02022	7.19987	284.287	2901.65	3616.54	1096.13	1757.49	3998.46	1337.93	4779.36	14007	1280.63	1342.85	2427.47	1010.17	8535	2004.36	872.484	775.887	1113.11	769.94	615.909	875.874	1174.83	1924.89	2356.19	948.185	1716.44	2498.46	2475.87	496.798	1737.11	1072.71	1324.52	769.74	6287.27	1060.16	1238.02	3710.34	3160.6	1581.14	1280.22	1618.83	2993.52	1144.88	1298.08	1173.61	6648.38	1067.88	1596.41
Peak_02023	8.06128	284.295	1222.31	1238.76	736.618	884.24	1156.04	254.307	1347.61	1527.32	731.472	920.021	796.643	1183.78	774.122	529.632	808.554	366.124	556.455	283.155	794.017	472.142	660.886	807.096	861.772	546.234	535.324	200	200	290.517	738.843	200	200	517.781	681.997	458.313	567.692	1083.74	752.326	689.183	305.265	705.021	578.173	727.178	773.72	609.351	1246.35	481.854	200
Peak_02031	4.17299	284.565	1899.34	2597.35	1688.84	2412.41	2541.74	1624.48	2401.95	1862.34	2439.32	2919.79	2228.82	2663.57	2778.04	2748.96	2408.05	1644.28	1886.88	955.845	2228.23	2141.63	2337.64	1744.08	2118.5	1784.8	2563.84	2668.57	2049.54	2176.46	2240.98	2714.22	2299.15	1915.91	2071.42	2110.99	2359.93	1949.29	1916.03	2255.86	1860.66	2319.7	2946.6	2449.26	2897.67	2500.95	2362.37	2302.86	2396.38
Peak_02032	0.621449	284.93	456.31	200	252.884	254.639	200	200	195.337	263.337	200	360.818	200	194.796	155.488	178.876	200	200	200	346.233	247.756	200	232.609	200	227.955	200	291.215	228.791	359.879	286.425	281.266	264.559	254.242	313.602	234.059	240.982	220.733	207.917	200	288.802	338.145	283.075	331.351	245.295	386.771	271.716	379.123	283.268	332.571
Peak_02035	4.07249	285.072	158.775	138.5	200	200	200	332.634	328.935	186.357	209.139	219.045	442.731	627.2	379.076	588.463	642.155	846.782	200	163.13	149.165	200	214.045	200	215.672	200	305.132	596.257	795.578	200	200	546.828	418.669	439.49	142.066	200	104.369	182.424	241.763	200	224.892	360.971	665.437	561.263	883.757	442.319	772.729	683.822	683.574
Peak_02036	4.29031	285.065	365.049	436.748	129.937	200	380.503	49.0101	403.434	200	290.008	413.008	401.187	380.132	671.836	200	330.806	397.12	200	63.2649	200	200	218.061	268.36	385.457	554.846	410.947	272.733	233.465	417.735	670.787	374.717	200	259.199	200	200	305.218	200	200	329.665	396.783	476.928	400.727	234.395	199.7	140.355	518.689	363.85	376.958
Peak_02039	0.913642	285.098	176.802	120.624	193.189	134.347	200	200	183.387	225.07	625.436	714.092	685.932	678.044	746.416	517.819	421.144	356.097	178.855	200	200	200	200	200	165.794	200	588.828	583.935	577.119	598.622	515.276	347.214	567.886	500.602	222.122	67.0479	372.399	99.0759	216.553	200	200	195.688	618.368	667.947	1064.67	725.582	771.13	755.224	665.149
Peak_02041	2.94198	285.134	366.872	200	507.785	333.984	398.585	455.803	292.503	429.031	447.602	327.225	361.612	616.822	587.809	472.326	449.16	326.834	200	200	200	382.621	362.914	200	314.275	200	723.34	376.856	200	697.514	599.356	608.217	753.937	531.533	394.71	427.047	654.711	332.754	344.85	412.385	200	437.714	200	483.987	711.381	528.082	526.984	200	366.678
Peak_02051	0.188314	285.28	931.57	1105.88	1131.22	446.406	200	705.433	1318.49	1010.54	603.226	861.554	491.361	1445.73	855.66	767.734	730.517	936.379	513.21	200	1336.56	814.328	910.371	200	511.464	814.383	904.582	972.845	822.505	1257.82	397.539	590.164	909.451	836.671	678.633	1163.91	1098.65	617.11	1157.65	1216.97	626.95	808.544	200	1312.56	1013.99	1686.8	1520.22	879.802	200
Peak_02077	0.730278	286.073	756.553	1153.28	1132.81	626.319	822.386	1154.6	1027.26	848.612	1668.96	1092.29	998.061	1806.59	1028.08	1545.77	405.19	200	397.512	1210.72	1136.89	917.277	1314.23	711.54	929.414	762.275	1713.05	1690.58	1536.23	2128.24	1156.35	998.117	1224.96	1785.87	735.515	1009.37	1497.31	877.091	1511.55	1121.45	1131.51	1608.08	1682.7	1684.73	2788.06	2139	1495.72	2230.63	2135.7
Peak_02084	0.763696	286.573	200	341.111	338.126	200	265.165	267.459	281.911	347.642	356.069	410.636	448.032	535.277	344.351	389.986	200	200	200	473.156	200	239.338	200	200	271.933	200	433.13	438.378	411.58	526.841	449.38	296.161	415.824	583.284	200	328.323	576.346	244.847	465.851	464.221	338.966	373.928	521.522	742.146	700.484	674.667	620.993	652.331	596.655
Peak_02086	0.581901	286.959	941.054	526.712	526.254	592.079	256.873	461.128	470.128	595.681	567.662	359.841	413.409	566.348	581.11	474.169	437.841	200	1030.83	397.462	474.574	466.625	414.176	200	464.497	540.452	572.504	519.697	597.707	525.003	525.894	528.401	487.377	558.782	475.696	422.655	334.005	536.727	439.636	394.768	502.692	462.054	598.411	505.029	672.481	541.796	430.024	489.544	478.199
Peak_02087	0.646968	287.003	1918.91	1681	1651.4	1697.62	1006.13	1967.76	1868.22	1909.94	2217.17	1728.37	1844.22	2280.07	2039.93	1720.61	1868.28	1139.68	1452.86	1517.3	1374.1	1497.14	1838.44	970.122	1561.74	1383.09	1905.64	1572.78	2013.7	2014.47	1961.89	1745.86	1972.85	2323.34	1433.7	1474.98	1663.26	1550.21	1996.92	1461.73	1529.21	2088.76	1530.4	1600.11	2042.86	1719.1	2006.12	2048.32	1917.68
Peak_02088	0.797242	287.052	1947.33	1567.28	1556.84	1135.9	1237.59	1808.51	1935.65	1260.35	1251.68	966.924	1327.3	1431.81	1476.59	1448.02	1469.92	429.405	1327.79	1241.56	1425.2	1158.17	1548.82	974.339	1602.47	1074.63	1715.85	3712.4	2532.88	1068.62	1400.57	1846.47	1442.44	1663.93	1271.05	1400.18	1323.8	1342.95	1514.21	1453.21	1258.25	1578.84	2132.32	1583.52	2742.59	1760.65	2520.57	1703	1796.76
Peak_02089	3.2281	287.057	4896.66	4119.21	5966.73	2814.33	4402.47	4652.29	3889.41	4490.22	2592.08	2397.11	3218.83	5929.73	5068.66	4956.35	3658.97	3309.21	1294.5	3416.35	3859.43	1947.11	2722.2	2383.77	3599.35	1290.96	4737.97	5723.85	4438.56	7280.26	4630.72	6266.09	6654.1	8428.21	2504.63	3009.9	3290.25	2812.26	2670.39	2658.14	4117.12	4844.61	4380.47	4461.05	3527.78	5410.99	5277.8	6672.5	6370.32
Peak_02090	3.37908	287.057	23609.4	25153.4	23838.7	23370	26528.8	31268.7	29694.8	27096.4	18224.4	17230.7	22270.4	31647.1	26191.8	24378	22850.2	16385.9	9481.36	22584.8	21006.4	13259.6	20938.4	12672.6	24882	17153.3	27688.7	24741.1	26765.2	28146.1	25419.9	24430.5	30339	28909	18779.5	23008.6	23346.9	22238.4	19020.4	21982.2	22014.1	24470.7	24342.4	23736.2	22022.3	27684.8	27358.1	21987.9	23989.7
Peak_02093	0.697057	287.07	3152.94	3824.43	3095.31	2847.58	2046.66	3732.03	3515.19	2781.5	3553.55	2814.68	3791.31	3907.92	3547.78	3080.35	2663.18	960.685	2196.75	2317.65	3491.33	1335.08	3516.11	1614.02	3410.19	1756.31	4213.47	6925.67	6012.49	4119.79	3427.12	3179.86	3033.05	3737.63	2997.08	3536.93	4512.42	3077.8	3446.95	2597.86	2858.72	3135.4	5344.12	5341.46	6418.92	5281.4	6169.08	4773.7	4372.46
Peak_02094	3.41244	287.09	768.219	669.848	627.084	745.33	669.893	817.371	974.981	849.833	533.05	419.36	599.156	1031.92	787.501	805.515	758.323	517.761	176.79	654.223	500.622	389.124	619.541	291.56	776.059	487.521	865.378	784.563	801.891	850.748	734.2	912.721	908.845	894.652	749.021	679.195	640.659	866.8	545.319	674.813	718.581	803.192	903.898	825.797	634.319	975.44	842.732	699.321	636.282
Peak_02095	3.56329	287.09	527.22	422.294	507.601	424.9	472.212	483.234	488.574	571.428	327.13	193.506	334.748	620.381	314.877	401.429	380.48	199.841	55.8453	417.194	262.388	193.137	336.278	189.513	468.077	264.413	423.666	419.651	602.571	564.127	301.943	454.085	589.782	536.62	445.191	404.355	290.352	534.45	350.681	381.264	442.681	612.501	473.231	391.253	430.196	435.499	454.373	377.574	247.503
Peak_02097	2.54452	287.114	828.523	470.864	572.21	415.855	1050.42	656.659	507.302	640.365	380.24	415.875	941.037	643.477	522.014	500.615	351.941	386.478	708.396	520.26	200	491.391	967.515	787.454	478.186	1045.06	626.455	537.196	753.922	525.707	781.593	481.878	519.701	732.401	693.042	200	374.442	358.498	816.066	523.994	613.346	509.527	583.724	1160.35	1464.22	937.209	1459.82	1011.08	895.886
Peak_02107	0.813994	287.554	392.175	257.533	200	231.657	200	329.785	200	409.776	200	200	144.713	249.431	213.999	200	200	200	200	344.311	204.33	200	256.641	200	220.06	203.876	278.884	661.597	360.896	200	200	250.127	262.477	200	91.5242	320.059	158.967	264.852	217.118	206.983	135.999	200	439.346	382.695	580.457	451.989	372.097	461.206	200
Peak_02108	0.713649	287.573	697.186	657.053	758.376	632.746	674.596	742.607	689.817	614.777	683.279	847.727	813.353	787.13	713.651	615.725	500.793	200	613.377	766.99	719.442	200	796.943	200	563.066	358.717	949.056	1351.27	1195.37	823.68	724.789	639.802	647.612	725.691	541.205	692.591	910.844	567.868	776.766	565.754	582.499	677.249	1127.99	984.045	1292.25	1138.58	992.075	983.467	1044.78
Peak_02114	3.2281	288.059	717.099	633.295	889.233	376.303	666.3	819.878	710.685	635.137	200	200	542.699	805.492	618.299	590.784	558.114	520.402	200	783.554	735.299	877.747	200	667.715	447.028	200	755.474	1051.34	446.761	1363.5	817.191	1108.57	849.68	1394.95	449.244	246.656	345.329	433.227	200	380.351	685.686	575.063	688.825	586.416	701.399	812.746	746.711	770.939	890.31
Peak_02115	3.37908	288.06	3647.95	3647.37	3709.26	3523.28	4596.41	4881.73	4763.84	4051.89	3225.23	2382.75	4155.04	4741.93	3668.89	3604.98	3396.04	2707.93	1749.21	3664.42	3058.64	2362.94	3428.67	2329.85	3731.08	2561.32	4161.63	4132.44	3796.51	4268.14	4286.43	3592.59	4446.55	4700.58	2928.76	3586.17	3227.72	3395.75	2641.28	3306.54	3491.39	4513.61	4051.27	3705.29	3676.84	4182.85	4311.83	3660.26	4292.43
Peak_02116	0.713649	288.067	706.971	568.239	456.349	492.807	295.549	472.912	568.635	514.666	579.243	433.263	608.289	617.283	466.95	343.244	409.396	200	517.741	472.53	494.373	287.768	507.098	265.65	625.465	872.484	612.873	999.146	907.515	658.719	544.025	696.238	464.538	409.776	573.213	525.394	581.546	622.581	692.311	400.022	501.707	457.067	912.056	777.242	850.045	823.842	796.38	568.922	729.941
Peak_02117	0.684884	288.088	3962.04	3851.83	4213.6	3599.52	2588.86	3159.58	3409.51	2851.99	4493.37	3164.28	3405.06	3682.24	3338.8	2335.13	2632.37	937.309	3080.08	2465.28	2925.36	1687.19	3026.43	1704.22	2840.47	1646.85	4103.62	3612.6	3569.38	3802.57	3300.18	2605.6	2734.73	2942.27	2962.75	2469.86	3022.98	3052.12	3662.33	2198.79	2794.04	2568.57	4321.4	3487.61	4056.82	4213.22	3047.57	3312.15	3455.46
Peak_02119	0.713649	288.566	95.7639	96.6831	157.756	200	200	204.985	106.804	122.017	163.112	11.8507	57.0318	169.482	138.598	200	197	200	219.569	135.063	34.1318	200	8.34627	200	125.829	167.019	170.575	229.544	265.04	245.209	151.768	160.295	106.388	171.097	129.102	134.054	191.298	198.063	153.087	200	43.155	196.769	251.041	189.513	292.803	188.53	216.475	136.053	267.047
Peak_02120	0.697057	288.589	1384.03	1054.43	1435.51	1173.14	1283.38	854.893	1165.89	1124.04	1459.97	1132.99	1044.05	1179.98	1240	658.897	741.178	200	1016.47	720.343	866.369	814.037	832.19	321.662	1050.64	583.366	1459.33	1205.9	1323.36	1409.84	888.275	940.855	914.525	1033.66	1043.24	880.268	946.351	1036.26	1346.92	655.358	944.222	855.682	1681.73	1374.79	1426.68	1537.61	970.427	1018.55	1033.08
Peak_02121	11.054	288.923	1205.03	906.096	1211.34	1014.06	1827.55	1195.57	1066.73	1201.26	859.2	955.78	1034.01	984.706	1007.07	785.421	1012.18	1063.97	1144.33	1191.67	1200.21	1098.32	1174.94	1505.22	919.253	823.531	939.927	1013.49	1027.78	1098.16	1106.01	1198.66	1188.82	1149.25	787.326	1065.15	1383.91	200	1316.88	1017.93	941.028	1123.63	810.684	911.515	1187.28	1097.1	1351.41	747.947	876.95
Peak_02124	0.730278	289.065	329.014	371.707	288.648	149.766	255.122	248.063	153.53	342.977	320.317	337.401	400.467	309.618	644.776	560.881	603.423	561.813	309.174	340.945	266.255	200	297.798	200	299.995	323.143	330.366	414.905	301.403	434.504	628.603	453.488	407.94	886.206	271.002	264.494	295.519	245.599	362.346	179.342	254.939	197.033	425.218	359.296	601.352	362.98	897.468	710.014	450.058
Peak_02125	0.930396	289.063	114.116	31.5386	319.576	112.956	269.272	324.081	95.2785	296.998	284.353	336.374	490.3	563.875	822.078	769.163	677.183	535.521	100.842	170.3	148.136	200	142.815	200	120.507	200	539.894	514.974	390.397	659.492	776.215	699.311	668.782	948.737	237.977	228.904	488.962	374.66	180.552	236.603	184.128	381.879	592.731	587.816	545.572	525.458	1112.48	727.605	524.558
Peak_02126	3.41244	289.063	520.532	612.869	524.729	605.014	670.882	768.715	613.873	582.459	283.897	429.089	608.34	739.758	595.695	482.136	480.8	296.816	356.014	556.691	494.594	435.778	470.767	509.242	604.459	364.236	491.199	506.496	354.56	597.937	646.275	630.372	483.135	650.648	507.556	772.771	607.538	1212.03	484.135	662.579	607.382	713.209	547.559	382.542	369.811	711.379	530.142	428.548	438.671
Peak_02127	2.06538	289.072	978.123	2329.47	2452.84	1681.09	1654.89	1269.42	1836.59	1217.07	1301.98	1316.74	1732.69	1541.8	940.38	1055.95	1007.39	569.517	832.865	2658.34	2784.93	1656.51	1141.65	1414.59	1855.68	837.027	1391.49	1159.57	1365.82	1028.59	582.555	769.964	1531.22	1064.77	2059.03	3471.88	2597.81	3640.37	1224.38	2655.26	2486.99	3293.45	546.953	1073.03	898.984	1005.52	200	986.484	489.156
Peak_02129	2.94198	289.072	523.148	267.759	687.628	396.949	258.311	298.649	522.774	489.678	200	200	846.399	1251.6	200	385.566	200	333.514	200	200	504.761	200	244.372	200	201.693	200	741.143	973.641	1231.31	1158.09	519.874	200	911.221	744.872	253.713	591.728	659.401	764.48	200	281.229	487.585	589.24	325.874	903.247	916.438	1259.14	568.85	567.341	718.069
Peak_02131	0.646968	289.092	2258.02	1740.56	2170.67	1674.46	1435.52	1945.32	1807.28	1746.77	2223.19	1916.97	2492.32	2796.77	2085.72	1773.05	1719.09	671.539	1649.36	1416.09	1871.2	931.334	1665.97	1234.6	1770.85	1135.92	2556.57	2719.83	2839.9	2575.98	2232.3	2148.56	2195.4	2114.62	1986.68	1559.83	1965.95	2176.13	2233.94	1441.92	1587.99	1938.47	2363.12	1989.69	2208.36	2109.13	2173.4	1921.77	1959.82
Peak_02133	4.02207	289.108	551.463	404.772	688.691	563.332	774.101	495.191	432.567	676.668	200	200	200	262.786	200	200	200	200	339.662	423.16	489.532	801.865	422.494	364.346	611.486	376.103	299.838	200	200	200	252.884	269.489	343.533	464.729	558.494	661.818	437.019	497.098	449.401	611.45	595.348	701.813	200	200	374.319	200	200	200	184.575
Peak_02135	3.32882	289.123	200	534.921	502.491	531.262	627.818	577.902	616.991	498.773	200	200	264.846	342.333	373.315	225.045	353.032	400.109	200	496.613	583.122	525.461	580.975	753.178	588.578	209.054	339.4	200	200	314.36	447.76	292.087	370.843	632.465	615.773	601.859	577.77	632.519	489.719	478.319	599.271	720.445	200	200	447.534	340.317	200	200	328.463
Peak_02137	5.89087	289.154	591.718	1027.6	795.856	953.152	1273.8	752.404	672.333	794.425	1042.97	730.088	785.004	880.804	701.863	840.411	746.107	810.915	585.961	200	572.861	640.023	836.552	1014.92	503.577	219.605	857.562	200	140.203	526.821	854.588	652.409	693.711	812.879	779.76	620.234	803.84	594.812	640.963	926.079	774.116	665.898	681.615	630.715	810.729	951.097	672.174	729.852	937.376
Peak_02141	3.49614	289.213	391.095	430.764	200	360.244	467.888	200	431.334	200	531.547	428.565	200	269.543	367.554	399.195	380.618	388.343	297.003	472.75	200	200	455.456	200	362.246	198.254	474.143	225.747	354.655	395.929	200	442.461	323.929	373.152	417.438	486.167	337.996	369.634	456.841	400.337	469	372.32	313.783	200	614.594	379.825	319.408	403.19	399.614
Peak_02148	0.640272	290.074	1259.04	748.725	991.007	649.432	557.647	727.184	705.533	758.185	947.38	763.125	658.076	564.921	651.947	273.651	163.478	200	516.913	419.342	595.517	304.304	677.21	209.877	418.84	307.663	982.524	643.143	821.807	834.908	609.754	226.723	295.503	276.677	785.449	412.448	706.251	444.38	1101.61	234.804	483.363	491.114	1150.11	714.073	756.643	881.368	595.894	409.114	620.624
Peak_02151	0.746939	290.094	383.574	243.635	288.609	270.372	269.024	246.671	254.905	215.985	281.228	398.457	383.99	344.733	230.337	254.549	289.046	200	104.133	272.607	182.043	200	266.929	200	285.047	169.39	378.355	372.601	428.564	280.551	348.006	287.525	381.03	318.051	297.291	183.274	249.639	237.031	272.062	221.589	220.394	218.411	338.6	273.798	357.676	392.588	277.712	248.586	340.286
Peak_02152	3.31204	290.103	620.277	1692.8	962.972	596.267	952.2	1085.39	1100.93	605.706	1402.85	1521.03	1704.41	1212.39	1644.53	1887.73	1799.86	1004.56	533.077	1399.73	974.309	615.906	229.121	584.632	1481.21	200	976.46	1421.4	1307.62	1471.84	1203.67	1973.9	2494.63	1320.32	1640.76	1201	851.986	943.126	3832.79	1023.09	1217.95	1020.96	4689.21	4042.07	3011.5	1404.05	1735.14	1606.63	5106.08
Peak_02160	0.621449	290.849	5816.67	6281.2	4793.81	6209.29	4456.09	6885.34	7884.66	7427.5	2977.38	4084.63	2878.16	2858.73	5969.19	4405.7	4309.46	4863.25	6065.35	5624.85	5331.52	4393.75	6956.83	3400.67	6081.03	6322.67	1567.75	966.852	822.716	1986.15	3191.55	3471.01	3146.59	2863.43	3388.41	4136.36	2374.15	4964.16	6315.19	7184.61	5122.01	5787.99	1016.73	752.234	1353.52	948.872	1710.56	2105.84	1388.42
Peak_02161	0.763696	291.019	860.547	995.905	547.085	732.146	1069.57	1419.16	1242.35	919.177	307.778	509.124	298.695	373.132	898.686	1067.22	644.385	273.1	880.056	749.453	786.542	790.639	1167	813.614	1195.18	893.079	243.253	318.309	214.295	152.901	451.003	454.557	399.626	403.356	490.125	386.463	320.153	601.227	622.938	951.455	697.548	882.76	521.428	606.052	874.05	461.396	1443.59	1262.47	495.201
Peak_02163	0.730278	291.05	648.112	873.615	1005.47	830.019	694.488	671.66	1025.13	607.46	887.912	1108.35	1107.89	1041.13	1044.2	976.92	863.279	628.723	664.099	736.588	979.21	622.874	862.591	420.274	842.66	609.484	528.649	707.177	700.685	1272.5	970.475	1013.86	797.293	797.117	934.336	1097.28	1250.73	1245.38	1208.99	985.455	992.609	1084.83	1089.66	713.732	847.446	1125.94	798.139	785.76	749.676
Peak_02164	2.75936	291.088	6401.96	20916.2	28122.1	21172.3	10561.2	6406.14	15025.7	10179.3	58943.2	63387.5	86516.6	102898	46776.3	53022.5	66516	46397.6	3518.37	18102.7	29216.6	15988.9	5658.04	3558.87	11095.3	3720.59	78315.5	98889	112475	106904	59132.9	46491.9	89843.9	69940	14377.8	51082	51951.7	41078.2	13153.8	26556.9	23532.4	32409.3	74293.6	112352	102283	108463	51713	72707.5	96380.4
Peak_02166	3.52972	291.087	3846.19	3027.19	3016.55	3222.13	3866.82	3030.62	3095.49	3608.24	1279.52	1497.66	2043.37	2416.24	2153.43	1522	1694.99	1366.51	1997.5	4038.99	2575.38	2204.06	3847.21	1791.43	2823.04	3027.45	2280.51	1818.85	1881.31	2421.79	1808.98	1833.81	2467.88	2803.39	4042.49	4307.86	4231.13	4294.98	4605.5	3587.85	3869.12	4793.31	1106.54	1430.03	2097.63	1808.25	1953.23	1483.68	2158.23
Peak_02167	4.57608	291.088	11778.2	13176	12088.6	12892.5	16178.7	11441.4	12760	16154.2	1176.93	1566.79	1507.06	2971.9	1728.34	1398.89	1457.54	1107.77	7278.66	8635.83	12540.6	10881.2	13155.6	6444.62	13074.2	11372.1	1498.46	1723.27	1876.91	2704.67	2081.55	1832.4	1756.62	3773.97	13033.7	14489.9	12258.9	16060.1	11529.3	11146.6	12703	15097.2	519.576	544.292	710.559	1502.44	390.167	420.809	2140.7
Peak_02180	-0.0765271	291.269	528.597	649.698	614.799	200	617.525	200	622.12	200	818.315	716.217	788.059	786.599	200	691.732	697.652	200	872.853	877.818	793.392	673.583	763.697	200	641.531	591.753	571.251	661.141	466.184	650.379	907.507	754.589	661.598	682.176	802.524	584.98	905.778	200	655.967	820.645	200	810.615	401.199	718.22	801.152	200	595.976	794.868	651.72
Peak_02182	0.684884	292.067	356.361	721.575	621.582	247.982	500.584	528.95	678.744	571.525	1024.96	944.844	856.73	1929.97	801.911	1291.45	166.566	200	317.124	826.055	792.249	455.43	723.909	200	571.438	717.221	1270.99	1564.12	1478.58	1775.05	1246.68	951.815	1501.73	2037.57	396.64	742.918	1271.31	641.537	1096.23	772.259	885.016	1214.95	1277.95	1802.37	2224.1	2420.62	1663.93	2731	1906.47
Peak_02185	2.77572	292.092	1213.25	3767.13	4430.58	3765.67	1507.96	1163.18	2393.16	1679.39	10080.5	11350.7	14599.3	16587.5	7431.13	8632.45	10975.5	7023.91	661.886	2828.42	4770.98	2297.89	891.27	820.086	1800.81	595.279	14199.8	17091	19147.6	17430.8	8248.37	8030.54	16038.1	11976.8	2663.52	8547.61	8960.22	7220.55	1980.33	4464.65	4083.79	5338.67	13208.6	21278.5	17839.3	20153.9	8644.52	11757.8	14467.4
Peak_02186	3.58004	292.09	536.301	510.831	480.572	572.196	773.311	441.14	531.454	522.169	200	236.839	381.663	342.528	348.01	200	233.518	200	390.649	622.68	420.616	378.144	672.478	490.938	608.773	300.56	242.506	307.875	293.238	343.669	154.548	200	207.43	365.789	623.753	655.393	741.184	704.264	575.608	485.168	645.439	681.723	200	219.843	200	281.339	177.6	200	200
Peak_02187	4.59288	292.091	1951.16	2183.37	1728.81	2102.28	2343.96	1732.97	2024.83	2485.83	200	200	200	430.289	200	175.833	134.969	200	1675.87	1154.95	1780.05	1690.21	1852	1407.75	2273.85	1859.24	150.183	254.918	200	393.096	200	253.98	225.34	624.599	2129.2	2378.38	1852.89	2503.68	1735.25	1847.92	2141.08	2654.97	200	200	200	200	200	200	200
Peak_02193	0.646968	292.846	1670.57	2011.8	1402.68	1934.04	1446.94	2082.04	2261.82	2349.33	910.56	1206.26	831.539	704.424	1552.57	1428.34	1048.15	1350.97	1432.51	1547.63	1646.81	1633.4	2064.47	1732.92	2103.78	1758.65	200	200	200	511.806	712.707	1017.99	1088.73	822.288	869.905	1308.98	740.027	1388.37	1684.54	1866.16	1474.71	1810.89	200	200	397.258	200	567.365	576.792	200
Peak_02195	3.82081	293.068	2006.32	2420.3	2061.04	2207.45	3290.26	2090.94	1676.47	2227.47	733.299	1143.22	1114.01	1898.68	1361.87	1186.04	1395.28	713.915	2668.54	1400.14	2232.65	1406.34	2494.36	2342.65	2303.87	1956.97	1431.54	1723.54	1612.74	953.014	1145.36	1335.59	1427.94	1632.96	2100.62	2693.49	2195.26	2351.58	2275.38	2155.96	2327.43	2412.2	950.172	918.825	1655.5	1273.93	1194.46	732.652	1192.91
Peak_02197	0.640272	293.067	2657.75	2930.89	3176.28	2535.43	2331.59	2771.23	3406.17	2736.23	2984.55	2163.38	2850.08	2850.45	3253.35	2675.44	2528.24	1317.73	1651.44	2007.8	2420.48	1605.97	1913.95	1119.96	2330.63	1459.83	2867.28	2848.59	3581.81	3079.16	2695.86	2364.09	2633.18	3038.35	2013.27	2625.66	2569.09	2992.95	2347.37	2294.74	2590.75	3065.09	2891.8	2608.82	2731.65	3289.77	2738.55	2647.46	2238.22
Peak_02198	2.77572	293.094	503.953	378.568	594.108	404.752	447.711	403.39	344.594	358.902	1441.75	1428.21	1991.31	2410.08	1124.44	1244.26	1522.32	1084.48	236.499	269.632	593.572	300.257	382.355	200	484.196	297.541	2104.23	2587.37	2537.25	2614.11	1476.37	1043.78	2252.19	1669.99	434.697	1102.59	1254.5	866.856	341.845	572.198	527.747	697.668	1781.37	2645.27	2622.64	2646.6	1178.56	1746.09	2121.04
Peak_02199	3.88795	293.105	116533	98578.3	116328	108932	143864	112908	96766.2	125951	39784.7	33106.4	48063	61717.3	46857.9	47619.4	46525.6	43870.6	67723.5	84189.2	110991	97695.6	99946.6	68237.7	116690	89898.6	62573.1	56547.6	65319.8	75223	73165.2	64625.9	69602.1	82911.7	114703	126371	112654	128069	108321	112001	125652	141724	34823.2	29196.8	42774.5	48966.1	39391.6	34924	54260.8
Peak_02202	3.51293	293.103	831.33	989.932	900.822	958.196	1172.56	535.561	896.293	1065.78	339.271	200	609.987	200	200	200	349.019	200	200	1530.32	562.795	889.032	641.806	781.114	893.872	200	504.832	200	408.226	955.899	972.971	381.273	739.412	200	639.891	995.534	862.305	1016.93	489.183	1006.32	1205.16	682.675	601.365	200	481.718	403.079	200	200	200
Peak_02204	2.90844	293.115	462.798	200	374.258	210.411	429.774	235.738	311.783	498.696	81.1918	200	200	175.96	200	200	200	200	283.678	388.326	433.83	408.898	466.279	200	302.144	338.445	183.009	135.538	29.5748	182.626	200	200	162.73	200	396.942	448.478	349.996	641.611	423.931	463.24	466.434	651.806	24.7586	121.138	127.733	142.673	42.1043	200	200
Peak_02206	-0.0765271	293.175	924.432	1289.33	1001.03	801.064	200	1264.3	1179.92	922.79	1039.53	866.189	956.797	881.391	1031.98	1084.6	873.04	200	752.531	650.781	1208.27	923.909	1251.23	200	987.43	1200.33	1100.99	835.633	1220.42	857.438	988.41	880.813	1066.25	1196.93	881.288	928.939	1015.41	1086.45	1013.56	1260.33	790.196	1032.02	731.743	1017.53	983.303	782.869	919.412	929.63	772.149
Peak_02207	4.12281	293.197	397.917	387.08	384.654	320.925	433.615	295.285	306.772	369.18	200	200	163.869	175.878	200	124.477	116.248	150.611	254.47	199.369	302.519	317.743	264.609	206.48	384.504	317.596	260.023	170.147	86.1734	187.563	148.46	223.53	204.453	244.669	335.082	363.687	393.093	457.588	338.901	425.072	477.971	357.124	200	200	90.9694	124.769	35.1311	200	134.042
Peak_02215	-0.0909927	293.285	2687.25	2855.27	2808	2144.87	2440.94	3308.2	3027.43	2377.43	3028.47	2872.16	2924.13	3057.87	2774.92	2680.48	2788.38	1991.87	2501.84	2554.21	2339.35	1787.9	3047.41	2006.06	3549.64	2599.52	3021.67	3029.81	2319.94	3198.5	2985.05	2857.42	2966.75	3112.63	2702.35	2987.19	2761.28	2762.47	2841.39	3053.06	2732.86	3031.63	2592.39	2709.18	3007.03	2827.14	2924.97	3096.55	2510.83
Peak_02216	3.93826	293.57	613.554	648.811	587.512	528.249	924.858	832.432	708.95	640.132	308.611	200	277.477	553.963	369.708	315.481	275.45	396.438	411.652	690.051	635.178	635.043	650.307	612.95	718.915	463.873	283.154	397.091	332.527	260.784	165.388	411.62	385.83	460.193	608.153	751.48	686.313	713.35	590.294	666.97	589.175	905.712	131.651	218.527	673.145	460.52	200	200	280.833
Peak_02220	0.66493	294.085	3305.58	3629.49	4419.47	3870.47	2440.57	2328.39	3844.89	3064.64	4724.23	4908.34	4198.83	5692.84	4225.73	2875.76	2777.63	1533.36	3042.56	2547.16	2975.63	1608.8	2392.38	1615.62	3017.43	1458.12	4105.75	4688.65	4692.67	5453.24	3398.75	3115.64	3064.53	3887.6	2693.5	2503.41	3703.04	2922.86	4066.26	2594.46	3061.68	3226.7	5163.03	4946.31	5936.87	4694.45	4297.45	5158.45	4259.52
Peak_02221	0.780457	294.083	4811.18	4978.26	5761.16	4711.39	3594.2	3799.73	5284.79	3979.44	6496.42	5971.46	5563.33	6702.92	5661.81	4646.61	4287.61	2186.84	3904.26	3580.04	4000.15	2171.09	3448.61	1910.02	4164.41	2210.49	6248.25	6275.33	6200.58	6617.92	4946.86	4937.47	4508.15	4679.65	3618.56	3359.14	4031.8	3943.09	5121.27	3126.85	4008.5	4297.72	6891.31	5585.97	7029.72	6675.83	5161.25	5961.62	5087.79
Peak_02223	0.713649	294.089	4811.18	4978.26	5761.16	4711.39	3594.2	3799.73	5284.79	3979.44	6496.42	5971.46	5563.33	6702.92	5661.81	4646.61	4287.61	2186.84	3904.26	3580.04	4000.15	2171.09	3448.61	1910.02	4164.41	2210.49	6248.25	6275.33	6200.58	6617.92	4946.86	4937.47	4508.15	4679.65	3618.56	3359.14	4031.95	3943.09	5121.27	3126.85	4008.5	4297.72	6891.31	5585.97	7029.72	6675.83	5161.25	5961.62	5087.79
Peak_02225	3.955	294.108	21364.2	19006.9	20139	19273.7	21160.8	20523.2	16795.5	21844.4	6722.74	6164.17	8368.5	10748.9	7991.15	7828.51	7653.56	6473.57	10671.5	12601.2	18566.2	14512.9	18276	10087.8	21471.7	16544.5	11605.3	9976.56	10894.5	13165.2	10690.1	11564.9	12659.4	14829.3	20461.5	21779.8	20978	23658.3	18096.8	20217	22539.2	22715.8	6028.51	5510.66	6975.72	9002.5	6611.16	5705.99	8224.24
Peak_02227	4.18974	294.124	1233.67	1422.75	1109.55	1334.06	956.064	1158.96	1213.5	1423.35	305.285	262.832	354.247	580.31	411.141	298.29	388.538	269.088	529.925	605.127	1102.39	613.331	1217.07	520.492	1461.88	891.825	756.56	459.683	639.113	671.477	318.522	732.563	901.186	992.036	1508.34	1481.38	1048.24	1591.77	1213.42	1515.12	1695.39	1325.32	340.905	302.487	166.924	604.716	368.715	194.74	339.022
Peak_02228	2.10516	294.156	1004.8	533.749	695.755	568.746	854.603	738.592	617.777	747.435	947.681	852.602	1129.15	948.153	1226.31	789.471	849.328	826.996	752.656	560.995	555.085	626.668	1028.72	353.035	784.199	461.813	1030.5	915.709	931.186	765.678	921.203	932.294	1025.01	1107.64	1037.98	849	966.186	880.47	1108.36	706.964	1168.78	1072.72	662.206	995.682	1542.6	1047.96	1186.9	1156.98	922.129
Peak_02234	0.746939	294.565	141.059	244.367	192.043	138.541	239.79	179.124	25.0167	177.914	227.824	137.981	295.334	352.089	221.427	186.881	304.201	200	166.809	200	89.8278	200	136.34	200	161.445	200	285.455	406.747	419.869	315.299	280.912	267.351	307.747	277.329	257.152	200	314.815	238.188	252.666	161.533	198.372	249.831	465.12	250.449	380.861	387.802	461.096	377.483	241.448
Peak_02235	0.713649	294.589	1870.8	1893.47	1826.6	1579.96	1152.46	1192.7	1881.17	1356.18	2377.7	1924.89	2163.38	2248.49	1777.08	1560.68	1648.2	637.045	1152.52	1847.66	1355.87	1220.48	1607.96	853.403	1448.54	830.866	1973.99	2216.35	2216.02	2392.65	1706.85	2175.67	1620.73	1710.93	1249.74	1238.25	1550.36	1398.29	1898.52	1126.19	1551.28	1131.23	2489.72	2096.56	2405.72	2420.4	1932.33	1966.77	1746.33
Peak_02239	11.0043	294.94	2855.45	2928.85	2713.9	3125.07	200	2880.5	2794.93	2931.91	2640.64	2620.45	2662.98	2799.62	2426.46	2836.61	2731.51	2286.69	3372.21	3195.67	2602.92	2207.99	2494.93	3862	3003.62	2514.39	3476.79	3044.72	3035.78	2794.28	2392.43	3015.43	3021.17	2702.07	2702.6	2812.55	3365.55	3435.29	2922.26	2877.89	2314.53	2823.65	2802.85	2895.81	3471.04	2813.09	3026.47	2623.85	2165.65
Peak_02243	0.713649	295.064	534.276	482.382	409.423	399.203	358.509	422.686	461.083	374.92	356.404	410.35	416.705	546.667	429.665	371.482	371.984	134.132	398.511	527.7	363.826	385.361	347.01	200	457.308	391.747	592.21	695.804	763.299	497.14	471.757	483.175	577.296	514.81	413.014	439.823	525.599	505.829	466.285	420.966	432.788	433.103	605.353	479.541	648.701	679.491	579.135	518.596	464.076
Peak_02245	3.97175	295.081	833.65	856.211	665.486	862.916	823.358	872.821	670.61	874.406	306.309	250.428	358.542	569.928	200	359.142	261.113	200	972.195	766.902	685.704	847.419	1139.87	927.27	962.869	921.586	370.101	367.845	335.232	548.625	443.095	340.86	200	613.816	860.317	910.895	613.585	813.804	814.744	847.714	813.723	884.277	246.45	305.988	695.144	499.001	306.25	200	426.267
Peak_02246	0.713649	295.086	1290.79	1368.54	1229.83	1397.46	788.928	809.328	1397.63	1004.73	1644.37	1315.52	1430.19	1672.52	1388.43	1146.96	966.725	424.325	1104.23	891.853	831.036	478.522	983.328	433.836	1001.8	625.136	1486.5	1692.18	1740.83	1606.34	1214.09	1383.14	1247.39	1247.75	927.944	887.633	1088.69	1044.47	1263.73	778.608	957.22	938.214	1710	1445.5	1701.83	1930.4	1201.95	1545.56	1163.1
Peak_02248	3.46257	295.103	2515.81	2709.12	2433.74	2785	3113.09	2488.12	2908.63	2681.69	2112.97	1876.68	2035.96	2281.54	1382.86	1875.49	1879.52	1244.57	1637.94	3542.09	2043.21	2463.66	2543.14	2542.98	2708.75	2243.26	2404.89	2038.27	1939.14	2168.91	1992.55	2091.05	2037.02	1913.63	2440.57	3435.94	2474.67	3632.47	1932.2	2597.09	2722.26	2871.17	2305.47	1706.85	2613.15	1968.12	1614.17	1204.63	1808.38
Peak_02250	3.9885	295.109	2740.26	2629.8	2615.83	2630.24	3586.56	2826.01	2275.07	2932.4	844.024	731.824	1105.67	1486.66	1055.49	1212.9	1084.73	962.544	1906.43	2106.88	3035.88	2037.15	2249.89	1463.17	2689.55	2315.16	1516.57	1418.83	1272.89	1581.84	1542.46	1401.78	1642.27	1842.71	2786.45	2949.04	2472.25	3130.35	2661.15	2853.91	2849.49	3182.59	711.37	612.759	1010.68	1153.2	776.889	758.66	1097.38
Peak_02256	-0.0909927	295.3	2005.51	1904.25	1400.8	1339.12	1583.22	2232.71	1699.55	1273.74	2103.92	2100.09	1861.84	2056.74	2193.13	2302.19	1846.27	1089.92	1415.37	1531.13	1464.3	1294.46	2043.29	1096.02	2361.92	1467.17	1972.54	1775.51	1516.77	2161.76	1980.44	1733.81	1662.22	1910.76	1945.15	1986.39	1992.57	1959.26	1871.61	1580.96	1644.7	1699.64	1465.61	1995.35	1665.5	2018.01	1767.33	1824.52	1261.72
Peak_02257	0.730278	295.586	328.74	248.281	257.678	210.381	200	118.584	279.728	306.33	302.423	374.175	320.514	415.708	375.04	220.738	286.364	200	223.747	272.637	120.943	237.775	238.61	200	200	200	348.663	439.894	447.92	363.76	269.913	293.514	293.151	271.607	188.786	143.704	192.522	280.525	286.656	134.777	276.195	232.49	409.717	315.78	424.067	448.887	455.285	403.395	454.524
Peak_02259	0.631247	296.073	1970.71	1755.09	1743.07	1160.88	1103.66	1596.07	1588	1404.39	1337	1039.72	935.541	938.87	1242.62	837.065	766.432	315.764	962.926	1021.07	1328.27	516.075	1388.52	690.438	1164.64	676.54	1435.71	984.945	1241.46	1235.55	1007.88	792.2	1031.7	809.164	1312.31	1095.04	1550.65	968.424	1838.3	774.326	988.543	1000.8	1822.82	1449.28	1356.93	1563.57	1357.49	975.883	1265.73
Peak_02260	0.713649	296.095	370.718	378.56	287.378	272.49	126.668	243.339	268.094	286.05	333.817	278.439	339.861	295.36	245.729	189.634	202.421	200	223.398	260.73	240.885	135.758	312.262	200	274.095	153.505	397.492	399.068	387.009	321.395	273.329	268.66	323.241	284.26	364.472	477.762	338.61	402.382	438.186	435.961	327.073	496.695	490.289	343.923	235.548	361.174	425.117	339.924	378.041
Peak_02263	2.51112	296.172	2624.38	2233.83	1924.12	2361.95	2468.72	2358.69	2256.1	2402.49	2877.3	3418.14	3496.92	3465.96	3937.93	3178.89	3599.01	2508.62	1387.7	2521.35	1786.73	1671.42	2930.03	1061.56	2379.98	1850.12	3545.38	2360.92	2037.68	3090.95	2909.63	3141.42	3719.15	2898.87	2699.89	2764.25	2813.75	2679.82	3175.15	2713.85	2656.98	2979.27	3139.98	3939.02	4968.36	4067.99	4618.4	3700.85	3862.82
Peak_02272	0.54542	296.945	2833.21	2580	2838.52	2512.01	1671.63	2345.18	2531.71	2751.35	3776.09	3017.48	3280.81	4368.53	3882.25	3387.87	2795.54	1891.84	2840.79	2516.1	2377.79	1882.75	2646.7	2014.14	2765.69	2124.07	3643.48	4085.86	4335.11	4453.74	4120.57	3963.07	4092.93	5009.14	2795.95	2901.45	2620.37	2867.11	3021.36	2789.29	3198.59	3644.39	3916.72	3494.54	4932.34	4599.18	4697.78	4814.23	4145.41
Peak_02278	0.864081	297.119	275.547	200	200	200	221.47	245.019	200	200	335.158	264.696	386.734	200	251.15	200	200	200	207.594	202.022	200	200	200	200	200	200	437.011	299.192	460.723	368.678	149.682	288.408	293.354	431.566	334.841	211.735	288.627	403.327	297.456	200	180.852	287.519	430.172	251.172	575.045	446.701	371.33	402.183	267.764
Peak_02280	2.52785	297.175	200	261.273	221.98	200	361.335	200	260.445	200	351.145	493.43	427.771	472.922	406.57	412.883	564.85	531.457	200	254.87	200	200	200	200	281.218	200	430.258	31.3214	200	279.403	200	294.614	588	411.175	323.854	293.447	200	322.418	435.841	200	305.35	370.901	389.398	554.909	605.129	618.504	431.133	518.557	509.782
Peak_02285	6.796	297.241	5909.02	5113.7	3859.29	4761.74	5086.58	4083.11	4621.58	4278.78	3987.56	4205.01	4301.9	4169.2	4797.27	4641.1	4205.35	3044.92	2315.16	2899.01	4193.43	2388.69	5029.82	2812.81	3817.85	3060.12	4911.12	416.357	290.16	1752.14	4493.15	4594.95	5192.91	4500.9	3782.97	2948.26	4511.77	4660.12	3561.82	4424.56	4017.3	5088.97	3792.56	3247.85	4777.55	5203.19	3909.55	4782.64	4318.41
Peak_02288	0.54542	297.945	1185.9	1074.78	1213.61	1154.51	1330.29	1143.14	1043.89	1310.51	1517.01	1349.09	1263.98	1630.02	1458.23	1368.39	1262.05	1168.6	1122.13	1634.46	977.985	1155.19	1165.45	200	1311.73	949.796	1609.86	2064.54	1870.36	1903.91	1782.2	1732.86	1981.55	2193.75	1115.74	1158.17	1205.19	1386.93	1326.03	1412.49	1462.99	1589.75	1809.5	1462.68	2244.82	2031.56	1674.47	1996.7	1535.14
Peak_02297	6.82959	298.244	742.837	773.001	669.52	687.18	948.378	693.239	809.407	691.274	641.756	610.349	840.349	698.98	673.171	768.5	742.329	465.633	851.691	422.854	715.824	778.46	697.732	868.469	446.859	453.024	887.497	200	200	269.748	788.76	750.475	747.862	704.448	709.402	385.16	664.899	772.208	573.417	829.568	630.036	782.522	596.672	573.887	707.806	950.654	737.477	775.123	652.15
Peak_02298	5.36647	298.275	2225.04	1324.36	486.286	1199.9	908.444	1667.24	1440.87	1276.54	394.531	553.786	468.696	332.659	2941.83	875.952	413.506	661.14	1276.27	874.937	733.337	571.9	752.187	1701.56	1283.47	840.535	735.053	4969.3	2666.32	254.6	657.088	1399.26	1376.67	355.373	3724.78	2197.29	1061.68	1702.42	1365.46	1551.97	2702.41	1279.16	342.437	200	200	200	200	200	388.381
Peak_02300	0.54542	298.943	1627.52	1464.62	1205.88	1286.03	908.592	1266.23	1193.9	1194	1624.64	1377.03	1604.99	2244.1	1753.02	1637.72	1458.42	1188.64	1288.82	1238.34	1223.64	1022	1275.97	614.806	1490.8	964.885	1947.23	1943.02	2008.94	2222.28	1635.49	1740.3	1969.48	2407.26	1327.87	1095.08	1126.35	1436.99	1521.09	1402.37	1514.36	1775.46	2031.01	1614.54	2266.56	2279.74	2109.35	2182.56	2147.17
Peak_02301	0.631247	298.995	517.096	684.106	524.074	539.364	400.364	617.853	694.759	566.354	428.298	308.103	333.251	351.958	331.806	324.643	341.677	200	745.966	893.523	548.23	477.987	615.003	418.494	609.422	714.67	252.44	298.275	314.636	407.109	292.383	311.182	367.649	497.358	512.264	740.838	489.89	589.466	640.39	769.543	525.586	715.593	308.77	284.592	313.246	411.024	320.593	314.482	282.553
Peak_02304	3.2281	299.076	200	206.555	119.626	145.726	356.116	200	200	200	215.494	363.757	170.8	216.962	185.973	200	188.472	327.787	200	350.81	312.611	200	137.029	297.594	203.87	200	284.46	81.3218	200	293.211	262.853	311.372	200	81.2733	200	267.923	236.823	200	296.331	226.528	200	200	353.838	253.598	473.519	260.581	349.464	231.664	399.267
Peak_02307	2.07048	299.112	2607.07	1849.94	2363.39	2011.76	2844.31	2504.44	1837.99	2456.13	2534.29	2397.4	3146	2809.62	3307.15	2228.74	2523.89	1736.09	1845.25	2036.26	1868.28	1930.15	3081.39	1483.99	2106.39	1775.72	2431.61	2224.96	2075.57	2289.27	2703.76	2360.02	2556.9	2813.13	2827.53	2356.67	2826.05	2517.75	3261.88	2468.97	3128	3491.16	2072.98	2613.74	3857.52	2964.2	3522.99	3151.39	2813.58
Peak_02311	4.96495	299.185	3934.29	4378.03	3188.97	4320.41	6090.08	4518.27	4678.11	3393.04	4587.58	4237.54	4010.69	5093.24	4542.25	4390.5	3889.02	3604.16	2931.28	2436.13	2753.82	3077.93	3607.91	4030.83	4255.44	3324.07	4345.43	3871.64	4057.91	3751.96	5074.15	4226.01	3987.65	4012.32	4050.35	4650.67	4298.57	4211.79	4041.52	4251.79	3794.82	4958	4346.32	4022.57	4757.77	4253.1	4396.05	4236.07	4888.32
Peak_02320	0.581901	299.943	387.534	200	200	200	200	200	277.073	200	524.912	200	553.796	599.045	430.684	396.715	200	200	200	200	408.657	200	200	200	298.215	508.142	526.98	463.624	516.277	562.005	596.885	425.693	532.168	599.382	333.591	200	200	426.793	200	200	529.336	487.164	493.385	368.529	544.182	631.235	513.751	643.751	460.762
Peak_02322	0.746939	300.062	225.325	206.543	128.705	131.711	246.757	140.932	264.109	308.768	308.848	269.01	539.841	615.073	234.705	206.354	200.92	200	144.049	305.401	242.895	75.6136	198.159	200	177.905	58.7766	488.418	882.37	813.347	529.92	250.515	354.927	305.217	462.117	117.756	276.471	389.571	257.694	285.197	172.034	269.196	192.077	628.285	462.656	976.04	808.28	713.635	647.809	579.749
Peak_02323	0.830715	300.057	413.363	369.637	308.113	261.468	504.62	349.644	382.239	307.523	378.039	467.67	705.935	859.677	505.321	474.255	477.147	200	243.306	363.542	428.073	246.618	304.602	200	319.572	316.568	775.505	1273.35	1034.86	731.941	588.942	739.129	511.398	715.494	179.824	327.525	425.419	383.08	403.554	331.28	429.603	388.026	916.963	683.135	1089.78	1132.15	715.313	880.852	645.573
Peak_02324	0.713649	300.088	2624.57	3047.71	3408.8	3159.55	2101.79	1885.69	3883.76	2275.04	4575.36	4770.57	4459.42	5718.13	4044.29	3633.6	3463.06	2005.04	2143.71	2429.42	2909.41	1577.38	2201.13	1083.08	2818.48	1527.4	4489.13	5651.83	5170.98	6112.39	4234.27	4742.85	3720.33	4063.81	1830.46	2056.28	2725.56	2288.47	3267.82	1950.43	2867.13	2608.52	5114.79	4550.34	5717.29	6380.71	4309.38	6018.38	4208.85
Peak_02326	2.13391	300.114	276.972	200	179.924	200	395.545	236.812	200	213.744	368.979	236.353	403.025	393.397	371.28	270.82	200	200	200	200	208.94	200	343.572	200	214.434	158.079	208.766	200	165.22	259.339	200	230.751	195.255	276.479	280.351	328.116	200	227.696	448.009	209.799	302.926	425.012	200	346.398	421.773	261.488	597.187	262.754	530.331
Peak_02328	4.98174	300.187	627.662	755.113	514.352	712.653	836.282	673.007	669.931	540.459	642.456	760.432	525.971	769.675	703.045	601.118	480.535	372.761	873.622	551.912	546.189	623.728	579.841	580.159	654.286	622.95	677.658	564.385	503.131	530.045	637.896	593.187	611.397	550.966	579.226	604.281	715.375	643.309	584.056	593.837	550.01	744.569	608.28	502.596	595.647	641.91	615.046	666.031	595.939
Peak_02329	-0.0765271	300.203	1555.36	2453.44	1820.63	1234.51	1243.38	2117.13	1827.55	2019.78	2047.94	1831.25	2010.44	1877.05	2057.31	1812.69	2054.02	1921.82	1659.96	1595.58	1688.52	1724.17	1821.27	1251.43	2009.32	1293.56	1746.98	1751.26	1514.99	1904.39	1669.42	1653.81	2100.39	1812.91	1522.89	1858.63	2085.2	1876.44	2196.74	1907.27	1601.02	2192.76	1868.71	2201.72	1825.9	1641.79	1760.94	1895.38	1367.35
Peak_02335	6.98086	300.29	389.729	487.858	265.081	337.083	493.304	303.049	403.067	369.966	294.296	406.759	377.802	450.285	445.311	305.459	309.219	200	290.448	200	419.639	188.941	366.735	200	345.08	167.475	334.215	251.556	200	121.122	244.196	310.894	504.865	381.594	340.753	277.51	515.239	514.603	335.163	369.31	273.726	258.03	323.601	485.17	369.455	301.217	275.589	296.052	268.546
Peak_02337	0.763696	300.568	62.0443	112.993	7.29492	32.2391	200	200	200	200	62.0614	200	161.51	175.79	200	190.221	200	200	200	200	200	200	200	200	200	200	100.33	432.788	286.914	292.193	200	171.777	163.636	149.743	200	200	200	163.432	124.178	200	197.968	2.38418	140.079	216	304.259	162.628	213.447	251.941	252.733
Peak_02338	0.713649	300.59	1002.9	1257.9	1035.02	1203.57	708.532	673.174	1358.67	684.247	1787.85	1700.22	1490.46	2346.89	1553.95	1370.62	1323.16	769.932	707.289	1337.54	857.734	953.866	753.555	251.24	992.801	553.815	1810.4	1870.95	1910.88	2031.33	1411.1	1806.37	1330.79	1427.93	712.361	805.831	992.682	797.608	1321.22	820.133	999.66	982.275	1949.34	1765.45	2057.34	2493.01	1532.54	2064.89	1509.48
Peak_02341	0.631247	301.019	333.802	673.709	575.694	522.312	481.881	425.791	562.253	562.881	1027.62	866.36	577.54	784.997	723.221	637.173	543.572	377.543	359.902	640.38	574.193	651.27	589.825	200	677.912	494.338	563.639	613.563	592.929	1120.78	896.458	736.562	546.546	802.581	803.606	988.323	1218.83	878.451	964.749	652.53	644.25	945.437	1130.06	893.908	595.413	1064.32	775.552	796.055	853.213
Peak_02344	0.763696	301.066	144.126	110.679	200	22.7069	65.4167	200	187.257	64.3912	59.8829	55.1783	188.709	215.997	64.3575	191.251	196.711	200	200	129.734	9.63338	200	200	200	89.2227	200	230.532	314.786	259.061	306.82	199.612	200.44	174.47	166.349	97.7918	55.2771	154.087	129.786	118.373	24.4921	200	101.084	306.356	168.996	305.489	314.536	241.772	309.182	189.869
Peak_02345	3.67214	301.066	5575.88	7118.48	5067.15	7003.31	7435.99	6413.71	7504.25	6605.86	5089.61	7273.79	4536.34	5981.03	6993.67	6186.74	5732.75	4036.64	5685.91	3792.41	4608.26	3047.56	6013.47	5423.94	7165.21	5101.83	6040.04	5741.43	4974.35	5180.81	4217.41	5827.56	6034.84	4237.67	6016.19	6702.88	6144.51	6166.45	6914.55	7216.33	5747.97	6869.62	6056.34	5370.57	6815.71	5808.23	5561.82	4940.83	4153.7
Peak_02348	0.713649	301.087	694.315	680.526	764.117	808.297	488.711	410.307	797.02	668.357	1009.19	1032.51	1027.16	1294.69	840.316	753.916	821	425.994	546.273	919.161	621.455	526.024	663.426	200	648.095	459.713	1026.99	1355.34	1311.16	1280.91	774.158	1202.31	863.932	989.552	345.026	429.495	584.779	534.638	891.362	460.486	464.948	602.747	1062.74	1132.09	1451.15	1565.48	897.078	1172.97	873.464
Peak_02351	3.72223	301.093	1244.97	1292.87	1261.51	1292.01	1837.71	1162.13	1559.61	1400.01	1072.26	1403.31	971.015	1360.61	1313.83	1229.6	1116.27	917.432	756.535	810.251	985.95	851.958	1213.61	1197.09	1145.14	1175.06	1097.26	1039.59	1040.37	950.416	983.161	1018.14	1150.59	894.883	1219.67	1274.89	980.013	1145.81	1441.47	1387.06	1318.29	1625.72	1150.46	977.984	1228.17	954.257	898.396	980.855	929.029
Peak_02352	2.51112	301.128	3875.98	3705.66	3001.67	3472.44	3974.96	3961.94	3434.24	3745.31	4320.77	5385.26	5757.64	5530.36	6017.73	4986.19	6108.64	4312.84	2794.52	3258.61	2909.64	2687.14	4555.62	1751.61	3901.71	2716.77	4746.08	2983.83	2194.56	4758.7	5033.24	4512.57	5017.14	4570.16	4392.15	3779.03	4300.13	3968.14	5656.01	4125.51	4271.07	4870.18	5200.26	7218.57	8618.6	6878.17	7461.62	6307.1	7361.59
Peak_02354	6.24169	301.143	5589.53	5486.62	4380.27	5136.8	6010.08	4274.36	4082.39	5596.8	4599.18	4604.15	4367.46	4639.74	4937.78	5517.87	4861.97	3363.17	2711.32	3021.88	4472.23	2804.93	5521.88	3231.66	3937.5	2328.61	4800.83	1388.13	1430.89	2393.94	5750.81	5199.48	4993.47	4324.69	4472.29	3249.36	4408.55	4697.95	4709.09	5742.46	4826.72	4730.02	3842.49	3712.27	5180.97	5440.61	5166.69	4254.8	5165.75
Peak_02356	-0.0331044	301.215	614.105	485.982	600.819	200	200	614.52	589.881	200	714.378	563.095	591.492	525.275	200	768.884	200	200	472.242	791.963	423.109	730.805	730.426	200	744.424	463.221	489.929	750.322	591.469	799.462	691.352	477.468	716.872	462.711	200	668.751	737.744	544.834	811.638	200	200	460.584	811.05	663.8	627.864	713.728	200	665.701	735.009
Peak_02362	3.70564	301.568	1742.95	2101.99	1592.69	1943.25	2661.93	1848.24	1982.85	1945.59	1275.7	1960.61	1265.57	1831.65	1862.36	1756.61	1594.18	1484.5	1946.36	1825.89	1258.99	1755.95	1894.83	1636.57	2044.09	1435.79	1678.53	1741.11	1310.6	1481.62	1622.33	1712.85	1661	1100.65	1676.03	2287.4	1765.13	1715.77	2011.05	2005.67	1625.75	2210.36	1574.1	1352.62	1975.53	1646.37	1550.81	1391.79	1296.94
Peak_02367	0.713649	302.073	1729.68	1878.65	1822.36	1501.55	1103.25	1550.95	1925.6	1250.92	1388.49	1375.21	1203.36	1228.36	1539.53	974.329	979.76	414.881	1025.64	951.844	1324.83	547.138	1295.41	541.197	1231.71	511.659	1474.71	1800.13	1644.58	1436.32	1348.69	982.84	788.157	855.742	1128.4	1157.61	1457.73	1141.93	1527.96	947.218	1109.09	1084.39	1840.83	1727.37	1893.37	1612.07	1649.33	1549.76	1245.18
Peak_02368	3.70564	302.069	182.32	487.273	303.199	194.513	744.978	187.655	494.186	308.219	395.731	459.957	183.214	200	200	200.787	200	399.729	279.752	347.815	366.435	273.521	337.739	350.718	329.879	300.903	172.073	200	200	200	200	286.535	282.111	200	200	342.067	412.647	274.922	404.703	282.761	348.114	372.479	291.597	170.114	200	48.6422	503.47	200	200
Peak_02370	0.697057	302.096	229.558	335.747	261.636	289.34	120.283	254.549	308.931	251.812	341.872	224.826	299.883	308.189	280.917	286.07	226.172	200	140.748	239.665	262.051	151.598	237.948	200	234.549	198.012	385.643	2313.43	6699.18	287.26	172.546	300.795	244.517	176.155	282.689	214.469	308.655	239.378	244.288	310.651	321.526	237.032	320.618	426.538	277.11	409.98	280.19	240.075	230.495
Peak_02371	2.56097	302.102	305.554	200	200	200	331.962	200	200	200	200	482.51	200	372.485	293.544	267.901	277.379	200	514.967	200	200	200	364.761	200	311.705	408.439	340.26	256.42	275.299	200	384.18	186.52	311.061	317.574	246.942	200	200	200	586.273	200	295.986	291.195	327.4	543.29	821.256	521.091	696.765	501.559	748.449
Peak_02372	0.897183	302.1	200	4.58338	40.9007	200	46.3955	2.14814	47.5847	200	34.2211	53.7513	20.744	121.468	27.6813	68.0701	12.6988	200	200	200	200	200	2.74423	200	200	200	88.8872	366.844	801.926	141.701	13.9604	26.7553	49.347	200	13.567	43.9039	200	11.1961	14.9095	26.809	5.64113	200	178.222	33.1509	200	53.4388	109.082	17.1839	122.196
Peak_02374	0.730278	302.135	585.611	462.11	441.309	377.189	403.924	693.131	362.488	378.637	235.049	225.25	438.322	539.942	857.771	371.33	197.836	200	449.01	534.853	421.083	368.259	939.358	498.949	569.334	490.019	422.519	442.549	468.413	695.707	781.68	641.128	419.605	615.862	804.903	524.637	673.528	538.442	1156.64	694.162	610.871	816.781	309.669	448.057	621.814	740.664	871.201	611.009	506.441
Peak_02375	2.54452	302.13	396.986	390.825	265.507	392.08	461.595	448.629	347.209	299.774	494.941	560.425	652.886	650.905	771.497	545.971	601.138	672.882	200	200	312.97	200	505.389	200	377.988	391.149	522.492	200	200	446.816	714.448	567.451	510.101	689.909	517.071	562.116	587.955	474.797	809.878	483.065	379.694	518.039	624.974	871.1	1019.83	897.393	882.274	655.147	823.465
Peak_02376	6.24169	302.145	925.949	933.899	634.502	810.669	1061.83	682.527	717.182	807.371	762.683	717.571	771.863	736.164	848.377	801.317	772.005	590.985	656.874	714.069	671.077	837.684	991.776	915.702	662.782	431.635	803.566	200	200	388.861	828.752	899.745	847.197	735.571	696.45	479.352	809.525	827.07	687.47	873.222	953.2	807.366	665.094	616.004	1014.9	891.264	911.851	710.607	925.128
Peak_02380	0.730278	302.579	338.801	340.877	434.634	298.055	227.016	224.632	399.533	248.142	319.019	246.755	241.324	318.192	290.701	192.696	129.793	200	200	255.753	189.183	222.427	475.797	200	295.885	200	375.839	431.121	296.666	289.178	331.864	300.086	172.993	224.078	292.938	192.97	338.023	189.239	345.21	200	275.624	213.308	402.441	342.588	439.61	494.958	349.884	303.841	172.242
Peak_02388	3.07419	303.052	15957.4	25124.6	22363.6	23262.1	19818.8	22330.7	22081.9	23556	10213.1	13212.9	14287.3	33290.7	9368.03	16580.7	14306.1	13522.2	11224	31058.7	32346.8	20611.4	21051.9	12530.9	24590.4	21429.1	20847.2	28325.1	27738.1	34882.2	20320.5	18688.8	28448.2	34325.5	21676.5	33872.5	32544.2	34133	17801.6	24175	26969.8	30424.2	16087.9	28622.4	17720.4	28215.6	15710.7	17877	19403.4
Peak_02390	0.730278	303.069	329.109	186.919	185.361	153.915	200	203.704	223.947	121.214	141.897	145.002	139.897	216.309	145.666	166.016	177.806	200	241.824	238.434	180.766	200	153.933	200	146.518	200	168.89	303.576	234.296	199.302	264.69	160.649	85.9805	141.114	106.91	218.494	228.169	185.084	213.923	179.808	102.689	246.605	219.009	280.992	286.778	185.616	111.015	319.862	218.684
Peak_02392	2.47803	303.091	347.512	200	759.118	811.713	348.167	290.864	296.177	1390.66	200	272.981	415.317	541.915	424.099	200	3929.21	1009.17	200	188.966	200	666.844	392.568	200	253.844	200	869.891	1274.39	1429.31	305.713	1145.72	1636.71	294.106	954.805	603.735	353.166	166.975	623.664	325.107	228.349	369.535	601.999	221.281	310.738	335.15	330.396	249.784	200	320.717
Peak_02393	0.713649	303.09	414.135	266.526	207.447	236.225	200	154.668	257.005	250.854	325.493	225.115	270.891	356.449	237.918	251.853	223.37	200	216.319	258.507	307.681	200	286.063	200	225.606	242.274	441.103	837.439	1497.93	344.401	280.054	248.338	277.597	322.419	251.511	271.616	270.083	284.464	332.208	221.29	288.827	229.093	419.987	370.652	457.676	482.358	540.386	442.159	479.392
Peak_02395	3.26168	303.096	219.616	275.986	200	259.899	200	200	198.922	157.454	200	134.328	200	289.832	200	94.6193	200	200	200	392.5	279.288	241.807	200	200	290.785	235.481	187.886	190.071	208.006	358.476	200	65.6231	339.979	428.8	320.374	313.532	315.174	406.029	197.021	289.809	276.286	293.773	200	280.058	200	236.729	200	200	267.964
Peak_02409	3.09097	304.055	2559.76	3987.17	3647.51	3833.99	3513.35	3199.63	3205.45	3729.32	1691.87	1890.01	2179.57	5227.81	1269.84	2428.62	2352.76	2185.21	1983.47	5391.68	4658.01	3424.41	2899.33	2020.99	3497.87	3273.19	3164.12	4111.96	4231.17	4953.05	3390.1	3099.82	4254.69	5523.11	3502.67	5552.37	4913.63	5191.5	2703.44	3703.95	4268.89	5054.44	2502.04	4422.1	2620.91	4601.1	2384.9	3034.21	3546.5
Peak_02414	2.32751	304.141	3034.72	3455.79	2882.08	2765.17	3437.86	3036.03	2756.51	3216.4	2806.41	3206.38	2914.06	2676.34	2777.03	2702.22	2674.65	2038.93	1591.53	3348.16	2654.75	2081.94	2931.43	1125.25	3160.41	2510.9	2590.76	3313.04	2897.15	2782.38	2577.58	3003.66	3294.22	2983.92	2897.79	3417.16	2898.09	3670.38	3057.05	3249.16	2744	3622.82	2047.68	2452.5	2549.95	2400.15	2315.17	2451.38	2363.03
Peak_02415	2.56097	304.141	2019.72	2050.5	1498.62	1670.7	2732.53	2418.91	2112.08	2118.37	1472.81	1956.21	2181.24	1846.66	2042.26	1926.96	1636.19	1527.54	1585.46	2071.24	1278.23	1237.33	2029.33	1115.04	1846.91	2574.37	1766.97	1617.86	1737.41	1841.51	2079.46	1926.41	2015.98	1948.15	1618.95	1479.26	1395.18	1342.86	2507.94	1986.72	1326.89	2028.94	1903.83	2877.15	2946.81	2545.91	3114.75	2281.99	2574.28
Peak_02418	11.054	304.895	1366.6	1712.94	1632.5	1505.55	1382.05	1645.29	1442.27	1806.57	1262.09	1404.78	1560.47	1081.29	1476.15	1575.2	1408.28	1268.4	1582.12	2060.46	1628.54	1643.41	1478.34	1935.4	1329.26	1689.45	1367.25	1484.23	1679.34	1273.95	1655.42	1547.42	1597.01	1224.92	1558.48	1162.45	1737.56	1446.23	1240.55	1512.64	1282.15	1645.82	1500.64	1477.71	1479.25	1428.04	1696.54	1462.11	1272.04
Peak_02426	0.713649	305.07	449.546	276.432	421.839	263.276	359.694	328.316	392.564	255.14	361.41	317.9	275.452	425.495	523.479	403.962	263.556	200	222.583	286.227	339.072	424.937	300.406	200	302.387	222.853	282.047	477.235	457.082	354.542	310.489	392.748	313.765	399.423	232.976	118.321	283.319	433.609	324.852	309.759	312.535	197.071	451.622	395.421	483.985	469.944	485.971	425.585	393.849
Peak_02427	4.60966	305.069	1570.22	1979.91	1277.9	1941.21	2634.45	1513.57	2082.34	2278.3	200	200	200	442.053	200	288.137	288.705	200	1607.7	1313.03	1809.94	1248.46	1667.95	1726.39	2078.07	1345.57	200	379.402	200	433.065	200	522.396	241.236	601.214	1896.61	2304.77	1945.24	2195.62	1509.82	1831.9	1875.81	2093.21	200	200	200	263.93	200	200	200
Peak_02432	2.35009	305.143	200	426.115	355.302	384.809	523.971	396.804	428.232	400.982	200	200	250.25	326.193	314.265	308.484	287.446	406.258	587.02	515.377	200	482.906	295.222	200	456.851	200	239.211	200	200	200	429.904	343.764	623.033	262.414	305.941	452.776	534.723	385.445	419.194	487.059	319.43	475.163	276.874	200	155.023	200	200	200	308.234
Peak_02435	-0.0331044	305.158	1127.87	200	963.236	820.374	1166.32	1349.91	1060.39	200	1294.51	1191.39	936.573	1239.98	1441.64	1423.41	1333.86	200	1198.29	1240.2	1072.83	941.332	1223.09	200	1243.92	828.981	1107.13	1134.62	1327.96	972.115	1584.36	1253.73	1230.92	1458.35	1122.16	1052.99	1319.44	1451.28	1453.65	1417.35	800.828	1387.95	1293.48	200	1160.29	1180.39	1138.28	1199.6	1325.14
Peak_02446	11.054	306.895	931.664	1024.21	990.298	947.787	1300.03	959.793	1190.97	1002	906.737	827.218	1020.92	879.836	1288.42	1209.36	1032.62	731.15	955.07	1167.83	1155.4	901.608	869.933	1075.67	882.914	1142.92	959.98	861.72	1283.9	1055.17	1092.28	1158.52	1064.33	1174.59	200	1263.43	1141.23	918.893	1020.82	1024.94	849.9	787.443	897.926	984.99	1071.46	1085.27	975.995	786.863	200
Peak_02448	0.713649	307.044	418.677	422.061	393.885	524.676	436.946	411.313	435.036	432.082	284.484	278.661	334.253	282.989	350.78	273.497	227.079	200	430.426	710.53	432.094	370.048	311.486	164.311	403.29	340.749	278.227	294.549	292.305	312.059	272.251	259.127	290.58	271.272	374.347	397.136	370.347	553.337	368.833	418.826	391.47	433.311	296.925	273.306	407.931	296.842	332.248	248.045	278.967
Peak_02449	0.697057	307.082	4882.67	3983.21	2759.83	3403.67	3781.02	5350.23	4658.4	3540.92	5398.02	4654.93	4352.61	4639.53	4954.81	5442.63	4121.89	2223.37	4857.17	4179.09	4487.86	3290.66	6584.26	2597.77	5651.46	3779.68	3883.25	4369.9	5467.01	3981.95	4001.52	4063.8	4906.82	4731.78	6719.62	4165.45	2592.97	3995.64	4830.15	6520.01	4923.92	5082.8	4754.06	4532.89	5328.94	4873.76	7702.59	5127.64	4484.33
Peak_02450	2.03948	307.082	200	594.949	674.242	498.811	273.571	200	422.56	161.312	546.883	542.518	616.549	572.725	200	252.698	406.451	200	200	671.151	801.489	464.03	200	200	200	152.265	580.409	570.152	602.081	351.897	224.918	200	556.08	276.044	350.196	963.363	551.474	969.101	251.467	628.827	692.773	937.269	440.784	787.815	694.03	548.477	197.797	671.539	642.585
Peak_02452	3.83759	307.097	182.27	163.076	166.747	200	200	200	230.639	200	576.669	557.43	621.076	712.762	433.867	530.34	726.384	419.249	200	213.85	241.386	200	200	200	200	200	741.258	754.149	612.337	555.367	570.23	643.772	759.332	640.574	200	200	200	210.703	202.133	200	204.14	308.437	627.977	666.791	622.97	692.133	697.319	494.08	469.053
Peak_02453	0.730278	307.099	2080.85	1873.42	955.495	1503.53	780.622	2255.22	1877.77	1390.27	1508.08	1055.68	1218.18	1496.55	1380.63	1721.75	1255.74	437.095	1436.2	1236.23	1794.12	720.17	2435.37	581.085	2451.92	1655.98	1490.18	1416.63	1893.98	1177.63	949.603	1476.67	2076.74	1754.6	3410.62	1678.14	981.354	2088.62	1909.66	3113.8	2458.06	1615.87	1664.5	1607.56	1404.68	1715.68	2863.94	1391.52	1081.48
Peak_02455	3.31204	307.133	411.414	494.073	393.454	546.578	810.678	530.898	441.987	409.375	228.515	264.299	320.055	439.204	301.602	347.227	350.071	200	476.884	549.352	556.523	506.173	508.35	421.213	477.562	336.206	318.043	309.425	296.113	384.495	413.873	350.687	277.382	392.544	475.875	597.639	473.478	501.836	492.209	593.168	547.601	538.199	153.031	210.468	416.887	317.617	200	299.062	361.598
Peak_02456	2.67693	307.17	452.653	358.065	326.999	408.761	579.247	524.396	435.95	722.631	220.116	231.538	260.414	200	200	218.818	216.135	200	200	424.614	409.806	434.969	464.106	460.982	485.071	312.998	312.167	1920.89	1791.23	200	270.804	393.538	376.506	385.659	522.371	675.681	447.672	573.971	400.353	429.333	591.685	469.281	200	346.271	200	306.618	200	200	280.679
Peak_02463	-0.0909927	307.3	782.874	900.089	975.223	925.001	884.384	1132.6	1110.26	968.611	1072.55	1225.06	1057.83	1001.13	1088.1	974.072	728.627	654.24	888.052	200	1104.05	1016.44	983.716	200	1150.2	738.83	1171.39	991.502	893.582	1135.77	1197.81	1022.96	1084.96	1056.25	781.127	858.41	1037.82	1233.95	926.326	902.56	716.139	1186.25	728.923	790.924	879.135	930.54	983.444	812.479	883.345
Peak_02464	0.797242	307.586	1029.81	782.746	422.553	810.005	1287.19	1354.26	758.452	697.687	420.876	367.426	414.381	330.312	458.738	524.622	200	200	1132.19	1045.75	996.162	923.627	1584.82	721.974	1320.46	1016.28	278.916	493.07	747.321	523.862	387.71	413.881	526.443	386.151	1589.02	841.882	477.124	703.135	1066.21	1551.19	1101.74	1174.11	390.679	520.68	696.103	350.465	1005.28	677.579	564.905
Peak_02467	0.963913	308.038	222.644	260.028	253.064	28.8135	214.05	172.327	260.248	166.505	16.2155	24.1716	67.6631	97.5753	37.6552	205.617	123.391	200	107.176	298.342	85.6707	14.7961	219.002	172.766	201.909	83.869	172.646	376.194	358.122	99.8866	111.188	221.19	243.607	167.311	25.8364	69.1916	212.814	155.736	203.136	145.549	125.498	131.282	157.732	215.043	349.046	314.405	526.697	356.919	292.097
Peak_02468	0.713649	308.092	7120.1	18821.7	19848.6	12494.4	11650.5	17597	12393.9	15337	15852.2	15258.9	17059.7	20886.1	14724	14374.4	13063	7198.47	2344.18	8992	15705	5346.35	9594.7	3259.4	7483.32	2943.73	24000.5	23250.2	16613.3	24260.5	21490	19990.9	21239.5	26129	14175.2	34199.6	34091.4	34548.6	25638.2	29127.6	27276.2	38328.9	16352.7	13649.5	17617.2	23000.9	5159.11	19036	15701.1
Peak_02469	0.847468	308.134	200	397.613	251.352	249.954	78.7734	264.567	208.298	240.133	282.274	182.233	311.137	319.768	172.11	251.981	193.078	200	200	184.717	170.975	200	136.55	200	123.57	200	445.333	387.184	205.324	354.437	244.464	388.528	394.017	457.091	219.86	604.974	598.831	754.875	452.267	582.979	485.784	775.83	286.26	173.763	293.442	395.191	77.8036	252.34	194.007
Peak_02472	0.730278	308.579	126.72	269.849	200	200	194.58	255.671	260.524	200	200	200	256.022	187.656	214.295	200	200	200	200	166.601	178.784	200	200	200	169.427	200	222.807	419.615	249.422	154.404	236.488	176.901	200	200	215.425	203.964	166.76	200	232.711	267.524	195.248	200	105.638	184.563	320.61	339.18	267.878	233.457	224.137
Peak_02475	2.82471	309.041	819.374	795.403	445.794	547.774	995.838	950.75	778.847	914.295	342.73	501.719	257.688	238.139	503.627	342.768	291.299	547.121	928.465	634.175	703.396	556.05	1184.06	843.58	824.568	862.955	333.246	200	200	203.42	200	243.036	301.062	244.025	659.655	564.727	462.996	656.421	682.774	699.625	606.35	646.076	224.289	273.574	248.844	126.562	242.973	253.365	213.093
Peak_02476	0.763696	309.055	468.758	516.298	421.855	585.306	336.654	415.804	535.843	590.658	277.918	316.909	261.824	225.057	226.266	203.808	195.911	200	538.548	464.11	527.894	669.938	605.498	295.795	571.087	413.314	190.049	256.614	269.769	297.655	186.77	198.368	221.908	205.707	438.086	681.934	507.149	758.807	506.895	581.576	578.689	567.339	225.769	194.502	287.46	235.526	232.659	231.416	217.815
Peak_02478	3.72223	309.052	536.614	452.701	89.0486	462.546	506.454	421.897	504.36	301.714	271.451	443.07	447.153	401.225	504.735	513.737	467.048	578.654	200	179.951	4.14293	314.442	412.811	359.793	376.061	194.143	462.647	412.13	173.26	282.592	305.657	461.116	415.43	403.57	399.173	403.04	260.499	420.25	390.875	428.472	407.223	348.837	383.309	496.414	592.686	456.329	473.44	260.44	329.304
Peak_02479	0.646968	309.088	829.73	2291.26	2243.79	1668.66	1564.35	2022.36	1415.1	1767	1850.84	1760.66	2341.4	2188.63	1485.27	1730.04	1537.04	780.254	630.915	1008.95	1700.73	622.079	914.885	565.866	956.847	413.314	2976.13	3007.61	1937.41	2995.17	2479.62	2303.22	2790.81	2996.95	1948.22	4165.5	4309.27	4445.46	2717.99	3915.69	3389.04	4709.94	2069.86	1908.39	2165.53	2921.88	614.198	2259.99	1840.54
Peak_02480	2.54452	309.096	3417.85	2822.29	1759.77	2449.68	3942.54	3273.79	2805.61	3166.07	2051.59	2383.54	2749.41	2231.5	2637.04	2090.36	2237.1	1645.85	2646.64	2053.89	1505.7	1849.94	3784.14	1757.76	2728.02	4311.92	2267.5	1618.96	1784.81	2104.2	2357.62	2139.21	1891.49	2341.34	2836.92	1513.39	1664.03	1427.15	3890.07	2748.71	2214.42	2815.43	2493.52	4081.2	4706.47	3294.57	4500.66	3196.87	3188.61
Peak_02481	4.59288	309.099	23870.6	26610.7	25332.9	24684.3	33475.6	21538.6	24815.5	31969.2	1505.52	2475.92	2495.1	5271.51	1633.93	1649.96	2471.93	1926	16418.8	17884.5	24876.9	22416.5	26476.7	14347.6	25487.3	23563.2	2451.1	2817.38	3126.19	4638.96	3755.99	2685.89	3100.27	6790.8	25017.8	27452.8	23530.9	30480.1	21361.2	21930.3	25076.9	29019.2	696.865	401.442	997.688	2728.93	678.673	380.415	3288.53
Peak_02483	3.51293	309.099	133476	118907	137569	127297	166833	105460	128634	131483	45942.7	49696.6	76120.5	87439.2	76183.1	59068.5	75330.9	53201.7	82455.5	136986	106361	111263	143512	68763.7	131391	102200	76260.5	72366.3	68384.7	82358.9	72428.5	74198.4	96810.7	100283	163130	183831	158147	172085	154728	145221	171315	189807	47649.9	55457.9	90961.4	79344	68437	52439.6	81979.9
Peak_02484	3.16097	309.099	320.69	1092.06	288.262	860.726	1034.86	371.924	822.536	899.215	10.0079	200	200	76.8629	8.43785	94.2767	59.7743	200	272.259	1235.65	1280.08	848.402	701.544	376.331	1093.64	896.119	200	125.677	13.1405	200	117.364	200	54.0315	200	866.109	519.75	617.076	833.643	466.006	837.121	612.33	477.966	200	5.6479	197.122	39.6405	200	92.8176	53.688
Peak_02485	3.17775	309.12	3060.15	2918.66	2781.91	2858.43	3108.05	2682.04	2534.16	2652.41	2092.99	1515.23	1631.95	1777.14	1252.45	1668.51	1470.42	1663.79	2742.89	3549.06	3333.11	2656.75	3880.8	2329.94	3219.93	2927.08	2209.28	1939.31	1929.38	1858.78	1580.83	1693.34	1758.47	1521.52	4089.49	4500.1	2720.75	4118.52	3247.1	3339.24	3101.51	4080.77	1458.58	1618.2	2106.88	1703.74	1233.32	1569.87	1894.43
Peak_02491	3.47935	309.19	159.083	173.696	210.427	249.799	163.634	173.403	146.831	117.338	200	44.4195	112.062	90.4785	82.7514	1.69513	200	200	121.976	144.37	113.737	225.919	120.907	158.52	237.15	122.75	200	331.472	613.93	68.094	200	200	60.5392	114.572	261.69	182.917	378.145	303.354	248.1	123.117	206.362	352.227	200	200	77.8439	117.647	200	200	74.7619
Peak_02494	3.63932	309.199	407.931	330.06	404.374	409.871	394.35	388.824	392.83	439.377	78.0105	107.084	256.391	225.022	237.898	103.819	140.873	200	212.57	394.01	298.957	452.528	408.575	307.571	445.231	384.862	192.452	333.187	736.284	199.184	109.658	207.101	233.654	326.729	517.767	501.297	578.338	577.487	433.385	424.686	650.114	576.556	80.3048	146.024	261.871	327.061	121.73	82.4401	220.658
Peak_02495	3.59668	309.204	372.623	322.844	365.104	413.391	377.854	312.543	408.257	401.365	200	110.772	258.941	225.022	223.332	41.8438	148.08	34.3371	212.57	394.01	285.591	452.528	431.782	307.571	362.726	383.06	127.436	353.756	740.533	210.596	88.0931	169.047	249.454	286.112	528.539	501.297	492.452	482.393	433.385	357.642	527.179	576.556	200	135.013	305.293	274.112	137.444	58.7891	220.658
Peak_02496	3.80403	309.221	226.121	271.23	307.764	316.363	315.943	221.886	102.744	248.885	322.333	286.534	235.361	534.022	308.19	225.488	258.851	309.735	200	200	93.721	329.754	251.542	283.504	181.627	286.536	259.027	200	36.4454	260.266	178.966	149.761	238.348	185.486	214.924	321.379	274.016	292.894	274.04	252.821	223.665	286.856	213.526	314.758	312.028	135.842	193.306	141.596	328.841
Peak_02502	7.31785	309.298	253.524	318.778	200	328.968	383.26	200	402.063	354.902	167.75	239.324	200	576.777	333.286	306.915	399.065	200	248.176	200	87.4243	200	252.837	200	205.171	200	384.095	929.67	502.14	200	193.45	305.949	374.235	338.795	331.662	425.548	360.819	387.117	200	325.901	319.92	200	251.005	263.524	331.456	465.411	390.405	371.306	171.167
Peak_02507	3.58004	310.069	629.974	671.515	418.31	649.898	948.428	731.244	724.88	759.977	422.749	881.877	562.309	563.284	633.685	544.363	573.783	677.38	509.335	361.54	330.849	488.57	797.575	685.776	527.645	400.137	519.389	384.721	276.467	364.668	387.8	473.061	505.253	414.136	625.603	523.329	577.667	435.322	728.355	587.658	458.78	749.256	429.578	440.008	579.871	452.545	388.598	490.693	377.287
Peak_02508	0.713649	310.081	373.448	851.951	824.827	584.031	531.422	830.919	624.802	729.504	766.968	714.283	836.886	1014.59	721.183	732.022	631.182	368.811	156.019	461.738	687.386	356.397	455.193	236.16	291.858	201.85	1224.65	1077.44	1499.27	1073.45	1109.04	1030.57	882.353	1164.51	650.443	1559.9	1689.13	1910.55	957.309	1287.54	1348.25	1701.8	667.831	651.36	855.241	1044.18	301.156	1026.81	795.893
Peak_02509	0.697057	310.089	401.812	891.239	824.827	632.387	550.38	975.885	633.33	748.116	809.7	737.895	931.069	1253.39	721.183	819.261	710.093	368.811	156.019	461.738	689.194	356.397	455.193	236.16	330.1	208.173	1275.38	1261.22	1761.58	1164.22	1109.04	1125.81	1053.2	1283.9	708.395	1680.59	1766.32	2111.26	1093.92	1384.07	1486.7	1787.56	774.52	844.243	891.981	1093.2	383.835	1026.81	795.893
Peak_02510	2.56097	310.099	368.326	248.565	200	301.673	557.961	415.67	200	324.416	200	313.605	307.386	200	308.09	200	391.671	200	619.296	432.392	184.032	318.11	461.998	282.29	309.466	619.946	334.766	200	200	316.586	200	328.542	200	200	449.094	200	200	200	513.012	301.899	366.306	200	359.427	571.951	767.375	402.621	570.662	297.587	420.957
Peak_02511	3.51293	310.103	24561.5	22476.1	21755.8	22282.1	24085.6	20618.8	22577	23846.4	7588.33	8591.77	12845.3	14722	13094.3	10190.5	12363.2	8622.58	12136.8	23367.2	17720.2	17706.7	27170.1	10867.4	24486.8	19374	12952.6	13240.7	12438.3	15416.8	11738.4	12642.4	16791.3	17895.4	29120.6	31907.2	30015.4	30769.6	26565.3	24979.6	29314.3	32540.8	8089.07	10476.1	16407.5	13784.8	12456.5	8634.84	13071.6
Peak_02512	4.59288	310.102	4105.16	4326.64	3719.99	4593.48	4708.12	3952.02	4091.04	5307.49	19.0626	374.635	572.931	845.001	200	187.357	395.85	335.313	2387.28	2903.11	4125.63	3182.27	4556.58	3652.8	4579.9	4335.11	379.472	411.181	539.512	838.984	453.572	475.432	428.124	1171.61	4379.03	4701.29	4147.43	5231.69	3664.64	3773.07	4545.08	4974.13	200	200	200	323.667	200	200	501.305
Peak_02514	3.77045	310.129	419.278	386.373	281.73	426.971	291.305	401.697	322.947	379.866	43.3595	216.733	187.69	293.843	263.288	159.243	406.329	214.73	271.988	222.853	213.158	156.123	370.059	443.9	467.422	220.731	284.202	227.268	221.367	233.816	200	435.003	334.801	396.737	428.546	543.367	264.023	481.557	478.85	455.145	615.625	408.46	163.785	222.685	358.541	280.649	203.461	241.628	87.918
Peak_02515	3.62274	310.147	278.182	181.737	151.068	258.384	287.36	204.162	206.302	214.532	200	200	229.584	159.132	89.4959	72.8894	190.664	200	181.838	208.175	121.938	197.658	291.018	173.048	231.018	313.76	144.865	258.163	246.003	148.481	200	105.069	194.476	136.132	435.031	434.76	225.579	356.748	279.166	291.111	322.697	375.057	9.10603	200	78.2784	110.725	200	200	200
Peak_02518	7.88037	310.312	2199.48	3887.03	1383.11	2216.98	1145.47	1900.73	2732.19	4858.6	1908.68	1064.22	673.655	528.393	4208.08	632.929	1392.43	726.023	2233.44	1968.92	1543.38	1067.37	990.832	2244.63	4939.48	2247.62	2645.72	10265	5502.3	879.353	1743.48	2648.67	4409.28	1285.37	2844.71	1443.89	748.16	1582.5	2280.79	1102.79	1182.42	2484.85	1606.6	1147.73	877.2	1160.33	3030.42	680.235	2073.43
Peak_02525	3.52972	311.106	3890.48	3220.42	3669.6	3382.45	4236.12	3019.55	3683.46	3488.54	1248.7	1368.93	2167.14	2867.44	2004.79	1722.6	2009.87	1631.46	2161.67	3948.87	2884.49	3076.85	3812.29	1730.71	3560.67	2912.15	2089.3	2028.76	1975.98	2436.58	2514.71	2155.27	2732.21	3481.26	4584.57	5004.82	5420.79	4651.15	4188.68	3708.96	4474.31	5012.66	1264.05	1473.9	2611.08	1993.6	1681.24	1315.75	2253.53
Peak_02527	2.92523	311.113	1079.88	550.48	708.479	668.072	999.135	1094.5	778.717	987.138	380.893	200	285.35	449.947	541.056	337.715	200	409.86	937.609	565.793	622.043	801.891	1053.45	884.644	789.272	558.244	454.967	148.073	200	200	510.173	586.882	411.596	608.592	746.341	631.215	525.302	666.15	808.068	594.864	720.432	964.575	200	264.97	200	369.922	489.512	332.32	497.35
Peak_02528	3.0426	311.125	597.42	359.933	264.198	449.527	668.262	631.488	563.886	616.093	942.992	603.687	760.076	796.676	916.457	787.575	939.625	640.684	465.133	191.807	199.854	482.666	703.062	367.084	562.871	327.022	887.332	812.701	1063.79	491.344	793.089	583.162	902.859	484.371	289.91	350.663	482.56	396.615	532.503	418.216	460.482	554.158	883.539	702.72	1417.61	897.015	857.539	904.742	1178.69
Peak_02529	3.27847	311.129	1159.69	1272.4	1319.34	1473.67	1529.48	1111.77	1351.35	1173.41	1949.71	2272.34	2655.96	3240.15	2223.79	2228.19	2677.66	2286.81	750.944	1625.76	1767.58	1193.62	1348.02	1424.55	1483.02	941.791	3089.94	3150.34	2829.08	3489.3	3330.11	3106.6	3308.48	3707.48	1507.26	2120.31	1863.17	1892.9	1536.48	1549.57	1764.63	1718.09	2346.76	2210.88	2628.63	3007.76	2559.26	2313.26	2758.61
Peak_02530	3.77045	311.128	5435.32	5371.58	5792.37	6270.99	7050.22	6187.47	5862.95	6650.37	3159.38	3957.97	4300.29	7931.96	4813.74	4568.22	4586.19	3899.7	3428.32	4484.6	6155.25	6044	6057.83	3364.39	6024.75	5216.63	6431.39	5773.79	5243.37	6964.49	6029.81	5760.37	7496.73	9661.37	6084.69	8137.66	6541.63	8151.42	5414.07	6148.39	6965.18	8412.97	2509.31	1837.83	2746.2	3919.99	2252.41	3024.84	3425.03
Peak_02533	5.43994	311.148	735.26	802.892	733.67	833.25	1189.26	783.455	964.985	791.565	744.727	788.633	891.197	769.154	816.906	831.809	934.441	660.168	637.268	555.264	940.948	917.737	934.032	1143.84	792.876	665.901	799.528	200	200	607.657	847.698	705.48	727.095	869.44	673.131	708.898	760.025	630.461	751.502	830.958	656.928	864.603	796.047	664.976	919.352	754.429	814.018	693.642	853.84
Peak_02534	3.92148	311.144	573.552	539.972	446.326	697.007	457.941	620.259	508.212	871.762	249.576	399.506	266.595	972.64	408.701	444.001	581.859	547.045	319.346	329.866	440.896	423.443	697.614	341.299	877.352	352.219	926.601	677.06	487.319	722.099	381.385	823.22	1009.82	1222.87	718.886	910.15	472.026	1116.25	555.821	743.774	985.59	835.329	216.02	231.176	150.78	354.776	151.94	190.792	207.129
Peak_02535	3.78724	311.149	568.652	558.318	584.504	634.746	453.634	601.456	354.931	709.581	160.538	482.02	304.274	758.585	390.157	393.688	367.461	293.404	205.114	292.22	395.655	406.458	484.887	470.549	763.504	511.722	706.065	449.395	491.408	496.706	361.98	599.553	642.639	901.735	648.939	648.973	344.497	823.739	485.263	653.471	785.917	706.514	211.599	134.161	241.728	389.186	144.051	165.896	319.946
Peak_02538	5.1319	311.186	293.572	369.602	200	376.907	452.458	611.949	354.216	315.174	339.708	321.254	200	381.288	416.988	353.943	512.003	307.026	391.353	200	249.67	200	379.262	439.81	373.162	324.712	310.623	364.482	461.946	372.917	405.151	358.608	398.96	242.38	338.127	398.805	461.208	266.969	343.587	256.214	200	339.824	355.391	366.111	349.196	315.381	305.337	396.218	346.593
Peak_02539	6.49338	311.221	1660.45	1680.56	1374.07	1515.51	2085.74	1247.97	1652.2	1489.06	1485.31	1451.12	1295.96	1526.46	1419.41	1589.9	1533.91	1085.7	1640.32	1147.52	1421.15	852.144	1517.01	1686.92	1604.59	1938.3	1668.47	7266.97	5521.67	749.751	1668.14	1583.6	1539.88	1494.68	1429.82	1046.36	1566.71	1556.02	1169.77	1516.69	1505.83	1822.79	1404.51	1543.1	1754.47	1703.09	1600.21	1595.06	1507.22
Peak_02543	6.796	311.257	692.194	701.755	624.835	571.478	754.089	688.411	678.763	719.221	718.817	715.631	583.58	778.355	502.906	582.06	686.728	492.008	924.761	404.82	811.553	110.858	740.025	742.609	580.746	367.381	888.366	69.5869	200	200	602.127	648.495	704.138	823.803	566.528	486.223	629.039	883.203	714.931	802.704	395.236	542.452	419.068	437.123	724.243	780.117	747.428	811.451	629.333
Peak_02551	3.34556	312.132	200	200	356.439	261.4	200	200	200	345.564	540.623	411.767	554.348	829.505	565.815	530.846	441.36	382.559	254.935	355.774	341.453	200	363.741	217.147	268.679	212.484	629.647	514.546	614.35	638.447	648.705	584.239	690.921	849.519	327.837	381.683	386.753	294.428	292.09	230.553	334.275	472.609	549.43	200	541.602	735.45	362.166	470.852	504.02
Peak_02553	3.77045	312.132	1248.55	1297.96	1193.68	1318.95	1397.76	1103.16	921.116	1280.43	545.434	852.327	878.205	1660.25	1092.33	776.093	831.894	743.378	1355.07	918.117	1336.12	1125.01	1194.36	1460.49	1322.8	1222.21	1334.19	1212.1	1100.65	1460.89	1278.99	1147.22	1761.97	2015.69	1327.31	1542.97	1397.89	1712.81	1051.59	1185.88	1424.45	1600.38	454.215	255.985	459.638	838.112	417.894	485.5	635.96
Peak_02561	0.54542	312.922	3114.32	2396.73	2634.01	1969.78	1696.37	3046.3	2548.83	2579.98	2624.22	2309.24	2272.67	2265.71	2562.09	1721	1555.45	1009.66	1767.61	1686.45	2698.21	1692.37	3009.04	1306.01	2167.82	1194.4	2753.48	2823.61	3097.79	2320.51	1923.35	2050.68	1880.58	2355.33	2419.1	2435.54	2648.65	2155.06	2759.44	1768.12	2170.56	2593.08	3140.02	2597.73	3988.37	3089.74	3412.16	2944.88	2352.76
Peak_02563	1.06404	313.056	830.719	979.266	648.489	677.363	1383.32	1509.41	733.991	931.717	722.558	518.652	755.21	494.756	691.833	774.494	508.677	385.573	943.453	1043.63	843.321	419.071	1263.68	1773.07	1202.17	2452.36	448.251	626.638	600.212	495.775	488.472	355.303	630.702	527.073	1360.07	938.066	200	615.101	888.32	837.019	943.758	760.12	630.812	713.097	1084.89	497.18	2668.11	1121.57	1261.96
Peak_02565	3.97175	313.092	818.896	724.624	635.33	706.754	877.037	614.904	623.158	705.203	425.488	337.199	353.316	436.184	200	356.376	324.217	345.728	685.745	497.244	679.599	655.547	548.916	589.311	641.179	1070.01	443.95	458.817	392.771	459.136	200	401.972	173.418	444.269	682.728	777.108	773.191	910.783	610.382	689.592	741.671	884.186	225.956	200	292.42	407.948	200	200	286.979
Peak_02571	5.92388	313.236	2304.98	3196.17	2395.9	2825.22	3276.45	2486.33	2949.04	2470.5	2703.77	2686	2987.57	3015.89	2907.65	2834.62	2234.35	2044.86	2486.26	1728.38	2736.74	2311.49	3049.75	3206.4	2247.64	1130.72	2801.12	973.899	515.87	2508.51	2884.38	2462.99	2801.07	2534.51	2357.78	2451.61	3129.72	1696.16	2464.73	2948.09	2449.58	2840.67	2371.32	2315.56	3497.74	2786.14	2521.67	2126.48	3157.59
Peak_02576	0.570455	313.922	914.755	625.798	741.677	548.307	372.487	747.199	492.668	764.198	579.453	644.271	647.195	640.176	573.104	615.733	475.865	347.541	567.796	620.695	713.111	579.821	847.805	325.806	505.997	200	708.51	677.992	873.999	694.167	631.582	545.056	400.748	781.515	538.418	717.893	687.506	632.339	812.332	519.391	736.012	842.273	822.188	640.489	1116.31	870.369	1186.48	959.539	722.329
Peak_02580	0.897183	314.145	585.743	428.97	317.126	318.905	200	492.536	330.763	357.93	682.43	637.406	609.009	542.975	719.548	580.455	400.094	133.066	367.138	533.917	322.364	392.119	503.142	200	386.39	357.858	658.085	597.565	627.2	652.194	506.611	678.564	556.683	581.203	471.594	474.464	441.447	315.829	587.579	427.733	376.077	627.371	761.3	523.018	749.878	775.551	694.912	725.915	506.875
Peak_02584	5.95695	314.239	462.418	401.501	341.982	480.098	441.731	200	398.141	455.962	520.384	438.775	433.087	455.533	474.516	375.666	311.577	598.544	272.741	379.229	414.379	833.457	456.329	651.001	601.346	200	375.285	200	200	348.655	455.199	446.07	394.008	436.017	503.001	340.047	549.425	458.791	494.284	331.044	321.556	367.285	439.05	304.656	528.241	402.604	425.603	399.143	572.854
Peak_02588	0.570455	314.919	1001.87	713.531	755.693	638.052	782.753	833.11	569.55	710.737	714.461	603.422	635.814	557.003	686.618	551.412	434.445	200	759.704	506.149	785.644	200	673.303	200	667.863	401.521	780.518	786.265	826.61	666.257	633.753	622.956	463.608	696.233	617.17	665.956	708.539	664.624	669.975	629.149	699.549	725.868	987.477	730.342	1065.08	897.717	1081.94	709.478	765.327
Peak_02589	0.54542	314.954	1277.8	990.925	1059.31	1066.24	681.97	982.559	970.767	1204.19	1335.77	1114.96	1425.21	1644.55	1360.29	1189.76	1039.91	1134.47	905.402	907.956	984.789	1134.84	1194.07	200	1149.8	842.111	1601.87	1683.05	1531.74	1626.72	1595.02	1528.59	1833.58	1914.41	989.473	1173.91	944.607	1371.28	1237.43	1274.54	1160.05	1523.42	1735.1	1422.45	1835.35	1853.52	1711.25	1659.09	1699.29
Peak_02593	2.10516	315.085	914.662	686.147	608.721	626.872	996.621	873.405	712.667	848.031	750.759	750.484	952.511	866.547	1263.95	855.734	815.595	583.021	631.382	757.327	660.472	575.848	1119.43	705.433	827.217	673.81	744.397	509.023	544.662	594.066	875.085	737.686	821.901	831.938	984.872	833.542	861.58	698.798	1118.22	863.11	996.845	1036.99	752.806	781.407	1236.03	705.489	907.428	852.741	859.909
Peak_02594	3.32882	315.102	418.77	541.44	608.08	521.053	730.548	593.55	562.392	625.29	249.17	294.184	346.687	241.672	390.252	200	468.994	337.871	375.919	543.251	718.132	359.703	488.953	784.77	496.654	475.314	370.597	200	200	429.75	372.775	341.578	347.771	482.492	530.514	764.009	479.372	612.953	590.369	426.308	513.861	677.575	281.603	200	298.016	357.48	343.916	262.58	421.867
Peak_02602	7.06506	315.196	712	1185.43	266.294	613.145	335.563	843.446	597.485	495.167	200	373.511	372.601	413.861	641.795	606.051	381.205	200	200	444.667	347.23	200	483.013	1261.99	659.905	1332.9	1031.57	1041.27	445.198	200	344.014	516.086	631.558	200	640.259	200	200	536.494	200	477.511	200	200	200	474.1	200	436.144	413.784	200	456.749
Peak_02608	0.570455	315.955	507.16	380.055	464.176	363.156	326.11	547.96	200	376.733	672.681	674.57	518.73	819.737	638.122	497.324	455.116	200	471.398	633.75	311.602	200	460.362	200	391.564	598.42	642.927	731.936	883.047	620.815	668.878	622.528	600.262	899.714	470.943	447.816	471.231	525.317	502.301	518.998	569.311	827.251	515.804	563.098	803.729	721.896	722.514	711.732	698.212
Peak_02616	7.46897	316.204	1476.79	856.902	406.86	200	1006.66	853.853	523.849	578.87	525.373	689.308	766.158	200	1152.34	1268.4	1011.22	728.221	551.764	438.366	200	562.948	956.439	920.532	578.508	710.277	996.517	200	200	200	668.792	1128.31	1147.52	752.673	1282.76	200	597.334	902.572	556.351	645.406	1061.82	1557.61	913.797	472.68	1082.1	1290.15	1605.07	927.872	1714.46
Peak_02618	5.18215	316.286	830.602	848.217	383.406	937.167	462.097	1326.45	674.572	997.67	602.448	581.064	1055.06	657.184	3090.15	1049.66	979.37	1044.79	658.149	267.243	490.829	269.323	481.139	808.289	743.803	424.361	1615.83	7798.84	4687.41	703.665	1070.38	2099.42	1649.45	912.765	1321.53	1189.57	836.003	1147.73	661.249	860.827	1172.85	1302.56	898.458	501.204	378.848	489.088	443.834	782.28	781.633
Peak_02622	0.558667	316.953	580.968	480.224	498.77	568.192	200	200	335.077	529.653	597.446	548.421	622.26	907.76	748.982	711.741	539.996	469.374	441.254	795.144	200	378.532	549.87	200	504.207	654.402	608.125	797.409	765.515	762.686	735.843	757.348	821.019	1051.85	529.798	503.998	686.225	565.366	681.194	521.662	536.252	682.7	812.484	543.339	924.368	705.684	794.043	882.056	772.803
Peak_02625	3.24489	317.067	4438.98	4576.14	4212.49	4154.86	5197.74	5846.84	3567.59	4862.74	200	200	200	550.914	200	200	200	402.724	3171.35	6604.03	6577.91	4341.78	4318.18	3924.01	5105.26	3978.15	747.797	327.186	200	1282.46	1029.14	588.247	465.244	790.311	5025.77	5921.78	5368.3	5975.39	4286.4	6026.19	7180.6	6589.36	200	352.469	200	200	282.728	200	557.262
Peak_02626	3.34556	317.068	8127.96	13215	9642.95	13132.1	11390	15092.3	14108.9	14266.1	2520.82	2321.8	2093.49	2575.49	1564.78	2370.57	1467.15	1616.17	9281.51	18029.5	12893.4	13577.4	12479.5	9061.96	16384.7	19409.8	2566.17	2579.48	2700.12	4034.52	3304.6	2541.09	2694.02	3004.08	12547.8	15558.9	9965.42	17727.3	9238.71	14762.7	12754.5	14392.6	2144.33	2373.8	2831.73	2666.44	1836.94	1792.2	2246.22
Peak_02630	2.52785	317.1	698.78	573.281	428.12	519.219	656.69	532.007	488.688	499.335	645.568	653.022	827.241	655.681	1220.14	820.832	844.511	570.966	534.656	467.139	417.703	486.331	621.182	240.184	607.295	507.367	747.687	532.033	293.075	601.93	690.075	850.018	878.769	664.01	617.042	580.103	521.361	658.674	875.954	599.24	737.433	682.36	648.67	997.068	1270.3	904.448	1130.5	906.43	902.211
Peak_02638	7.01443	317.211	590.57	392.403	159.737	215.983	411.653	410.009	252.445	428.673	310.406	401.68	307.988	511.305	489.628	484.102	370.96	200	465.454	200	263.625	200	370.901	909.276	365.08	485.7	647.884	297.261	248.533	200	539.885	622.414	584.48	394.848	560.645	399.4	200	297.315	341.926	398.084	489.888	494.278	327.496	391.492	552.386	645.624	527.271	427.06	509.881
Peak_02639	7.48574	317.212	2513.26	1081.72	383.185	281.799	1088.3	1280.14	787.889	618.064	839.075	1020.71	1270.25	200	1913.25	1884.09	1307.09	1210.18	1062.31	488.165	470.545	594.436	1195.43	1291.91	789.85	1160.4	1714.67	200	200	200	729.784	1928.28	1818.02	1074.66	1789.22	426.186	936.749	1287.7	719.562	1031.74	1689.85	2172.93	1703.62	1054.4	1245.09	2162.64	2226.68	1278.69	2457.56
Peak_02640	4.2065	317.245	376.959	500.801	550.267	458.937	587.302	602.373	542.297	502.646	711.442	896.203	565.753	718.96	854.332	752.471	700.604	827.222	458.79	513.65	490.676	200	605.288	673.79	489.181	430.765	675.078	668.305	606.496	647.213	680.938	768.682	626.314	477.055	423.039	441.729	543.165	329.66	486.15	583.302	357.368	460.091	825.938	659.539	753.443	645.024	817.101	753.657	626.419
Peak_02648	3.34556	318.07	1409.99	2099.67	1669.25	2187.74	2036.69	2248.89	2270.15	2340.29	227.673	323.519	392.17	361.634	189.739	322.019	244.436	270.471	1320.15	2804.99	2045.85	2366.28	2176.02	1869.9	2514.25	3108.43	590.087	440.726	517.772	659.296	599.438	533.367	457.54	450.545	2328.46	2790.11	1788.03	3066.57	1358.62	2582.01	2128.86	2375.44	376.416	251.293	456.482	418.893	253.731	301.175	363.694
Peak_02662	4.86139	318.28	834.218	824.69	661.932	994.636	1220.68	837.818	1092.55	1022.09	907.105	1106.91	1040.77	1091.85	877.786	909.597	689.625	784.314	980.247	563.201	780.645	801.403	860.772	741.319	1048.91	818.789	871.481	769.883	885.591	782.65	866.102	843.176	838.181	873.194	794.572	1073.52	823.759	847.564	816.535	857.122	812.372	1074.17	1003.15	767.1	1127.17	819.853	825.454	871.907	932.951
Peak_02669	0.780457	319.051	204.959	204.246	156.12	200	200	219.966	255.631	180.425	200	200	11.338	183.783	162.295	223.453	200	200	176.202	200	157.607	200	170.267	200	315.749	200	116.073	204.735	21.6472	200	255.648	159.93	153.738	127.059	173.272	200	200	187.528	177.898	201.24	249.445	218.441	204.279	178.079	206.303	192.082	286.324	290.452	181.001
Peak_02673	0.864081	319.096	321.407	153.546	20.3252	136.441	200	392.629	123.78	321.5	469.943	439.698	399.252	313.611	373.181	500.768	332.766	200	200	182.157	146.888	200	393.361	302.063	165.309	181.169	455.889	309.425	393.305	372.146	481.669	342.116	239.094	436.951	359.644	200	377.273	294.079	330.168	218.759	200.075	375.983	644.671	462.7	660.08	623.548	511.578	570.498	429.765
Peak_02676	2.32751	319.134	2370.92	1725.94	1949.48	1478.79	2624.34	1705.82	1631.77	1805.98	1055.47	967.042	1141.24	1210.55	1121.05	806.216	976.617	895.778	1180.58	1745.94	1443.68	1714.68	2317.88	897.452	1475.66	1488.69	994.355	1052.21	913.608	1253.02	1109.18	896.351	1177.2	1307.11	1962.02	1806.49	1553.47	2010.03	2054.24	1874.9	1851.77	2298.77	435.012	472.035	796.274	564.429	566.783	784.292	717.947
Peak_02684	6.77921	319.285	208.614	370.903	200	200	200	298.984	329.009	337.073	85.979	299.719	163.806	259.402	244.596	200	351.256	200	200	403.646	289.228	200	314.933	200	227.178	200	286.034	314.017	200	203.884	333.91	302.42	373.465	214.385	200	305.238	253.784	443.778	256.321	222.145	200	155.504	180.454	144.346	361.437	219.92	200	223.673	211.14
Peak_02688	0.930396	320.135	540.093	416.982	514.405	450.867	643.982	519.472	658.694	482.948	809.899	640.932	676.448	658.436	549.67	512.054	676.961	374.447	559.105	670.419	596.517	192.264	607.741	435.765	572.504	404.876	586.746	584.416	864.262	548.259	556.109	463.764	635.013	617.559	433.879	484.43	517.372	510.396	575.001	465.822	462.556	455.574	634.129	469.354	1005.9	627.722	693.863	721.45	762.743
Peak_02694	0.612658	320.868	5199.72	5566.02	4796.53	5780.36	4081.76	6426.52	6430.86	6571.29	4880.8	4741.03	3835.6	3842.15	6546.37	5411.22	5104.48	5258.89	5399.25	5097.05	5199.92	3673.18	6343.08	2808.08	6055.55	5808.81	2690.53	2442.27	2133.3	3557.35	4388.01	4573.3	4678.74	4316.15	3584.25	4310.37	3377.53	4673.64	5626.07	6233.48	4470.79	6014.69	2038.75	1918.35	2748.44	2166.61	3273.92	3660.56	2819.95
Peak_02696	0.730278	321.06	1117.43	1325.56	1065.58	1086.86	823.138	962.8	1135.45	977.277	713.247	575.261	707.305	640.427	630.578	578.813	500.411	342.201	1131.63	1040.9	1311.88	891.525	1012.17	534.028	998.505	792.104	568.816	674.531	687.271	707.423	548.002	720.261	644.134	707.581	1266.89	1122.69	1066.43	1495.82	1104.85	1249.13	1230.77	1225.35	585.698	440.435	604.905	757.449	589.435	575.814	528.481
Peak_02699	0.797242	321.094	660.017	475.194	603.991	260.792	582.55	430.506	595.2	536.778	1158.13	967.541	1286.32	1130.53	1043.22	1054.26	1152.2	579.047	343.065	503.474	463.184	200	499.813	171.429	503.228	406.21	1059.37	817.521	1019.33	1210.72	1122.56	911.118	1051.52	1487.49	480.376	450.47	451.09	630.665	674.726	435.101	506.928	616.575	1104.59	1158.12	1681.16	1379.58	1550.97	1368.59	1083.39
Peak_02701	3.65573	321.097	889.24	539.134	661.041	200	921.303	711.865	768.614	709.475	298.917	200	400.581	767.257	351.672	289.72	200	412.731	200	200	200	200	772.165	753.885	510.429	589.245	450.296	478.178	667.167	525.442	293.811	400.352	319.082	553.195	200	200	689.123	372.951	824.309	635.724	792.238	693.625	200	332.337	308.557	415.434	592.547	200	495.169
Peak_02702	3.82081	321.102	530.413	636.004	200	288.578	748.194	680.9	495.99	845.041	200	200	159.227	218.508	333.823	231.622	169.449	200	657.367	957.456	687.782	1092.36	740.033	539.368	718.021	530.598	285.665	269.663	350.518	200	425.664	213.373	12.3757	289.991	852.035	1179.17	816.957	1045.94	317.085	489.112	752.695	1030.04	200	277.967	101.166	208.957	394.949	166.591	215.187
Peak_02703	1.4215	321.119	1621.56	1291.2	1308.16	1182.6	1900.36	1571.54	1493.1	1518.9	1027.04	750.382	1031.01	791.915	1029.96	794.357	850.861	405.522	1368.01	1446.71	1385.26	1037.87	1605.99	847.588	1402.44	1184.91	859.551	718.554	726.3	663.939	1004.27	909.088	938.982	943.451	1512.82	1498.78	1107.8	1458.77	1776.52	1421.41	1710.03	2066.03	674.373	680.742	1024.18	718.442	1136	827.354	1001.7
Peak_02704	3.32882	321.114	624.189	498.429	581.283	584.186	625.448	573.373	627.207	657.944	345.504	200	383.792	325.897	362.76	330.879	315.048	200	539.718	603.897	718.741	521.988	558.813	779.242	567.707	512.713	433.506	200	365.553	200	562.298	472.661	459.935	494.673	530.391	647.586	514.427	612.506	493.1	540.374	748.412	560.809	196.444	346.167	456.539	294.08	351.669	342.022	384.813
Peak_02711	-0.0909927	321.317	3147.16	3269.49	2646.62	2768.8	2133.26	3370.97	2610.25	2327.82	2903.69	2682.48	2627.27	3233.14	2804.12	3106.2	2958.12	1702.4	2543.66	2796.48	2228.84	1857.58	3061.41	1387.61	3720.15	2679.17	2825.17	3138.03	2323.12	3339.38	2998.77	2572.68	3014.44	2958.75	2488.58	2727.48	3008.11	3303.03	3465.97	2898.25	2606.08	2914.85	3310.62	2736.96	3119.84	2750.22	2808.87	2776.16	2650.81
Peak_02714	0.646968	321.869	915.363	838.088	772.549	835.586	581.903	987.742	1028.54	1209.1	779.296	892.1	568.141	568.602	984.656	751.45	728.224	1109.98	948.989	1074.31	723.25	1114.66	827.681	574.758	851.101	855.714	509.963	376.86	200	200	715.833	712.699	671.017	613.626	606.526	633.552	200	643.714	903.178	961.84	876.463	927.417	395.706	200	200	200	602.587	461.454	200
Peak_02716	-0.0909927	322.05	12413.4	14109.7	13493.3	9403.19	10700.2	14183.4	12636.2	7992.52	14742.9	12850.8	12886.9	14646.7	14290.8	14398.7	13154	7135.28	11846.1	12004.6	10186.7	8212.16	13263.3	8376.44	14865.1	9883.45	11819.1	14056.6	10912.8	13785.9	15654.4	12420.4	14093.8	13393.7	11179.1	13312.6	14175.8	13501.9	16239.1	13421.9	9645.85	14441.8	13226.4	12054.7	15502.3	11005.4	13985.2	14076.8	11434.3
Peak_02717	0.640272	322.07	391.468	355.416	380.893	389.797	206.073	430.6	435.203	314.659	392.236	478.666	326.301	425.683	426.986	266.807	328.896	200	304.982	233.24	288.25	203.142	409.533	200	371.883	349.438	311.88	386.795	320.212	510.515	408.735	372.474	306.413	243.08	513.919	506.536	671.772	607.757	553.06	456.541	455.036	457.047	629.079	438.024	483.214	631.383	490.444	385.042	345.272
Peak_02719	-0.00410521	322.069	1500.14	1605.79	1071.4	1049.63	706.213	1583.62	1294.33	661.756	1545.79	1439.31	1116.65	1291.01	1404.07	1461.75	1183.62	1027.21	1256.69	904.571	1200.97	1226.53	1093.26	592.559	1436.48	1012.57	1299.09	1363.56	935.236	1199.19	1160.27	1277.76	1403.39	1421.12	1280.82	1260.38	1082.97	1699.31	1521.65	1713.74	997.928	1280.59	1455.65	1349.11	1031.63	1314.53	1493.28	1350.33	939.201
Peak_02721	3.32882	322.128	259.218	340.003	384.368	366.965	513.686	416.823	472.825	505.803	245.768	200	248.153	151.781	241.755	200	210.714	187.33	622.489	500.052	471.482	574.092	434.266	484.055	382.15	266.378	245.833	95.8677	200	243.432	276.181	288.426	214.146	339.421	376.524	383.115	314.558	378.337	326.981	355.112	348.905	470.22	200	200	152.272	243.683	234.296	200	206.713
Peak_02725	1.35751	322.151	932.094	852.761	671.917	678.484	970.72	813.678	831.78	735.601	509.446	359.174	520.932	629.878	551.503	326.855	437.114	88.2844	472.023	843.53	743.973	567.219	934.713	523.719	802.908	511.653	651.585	373.728	336.587	539.147	544.301	481.721	514.861	678.375	700.943	679.335	707.083	758.401	973.85	715.969	970.67	1003.69	323.238	365.517	591.893	454.162	374.652	436.927	397.074
Peak_02729	-0.0185875	322.319	602.955	200	857.776	200	547.6	634.026	706.246	200	589.681	654.746	836.407	548.524	528.879	634.89	665.009	200	200	200	611.608	616.614	630.172	200	571.209	516.051	675.123	734.465	683.215	707.698	614.939	587.838	588.097	672.164	200	538.414	602.069	200	608.924	539.969	200	717.95	870.502	372.667	745.348	719.053	452.332	682.039	522.417
Peak_02731	0.621449	322.866	2021.72	2137.7	1844.75	1981.8	1482.92	2301.27	2087.78	2365.07	1594.18	1746.37	1379.29	1167.12	2318	1968.12	1646.92	1917.2	1811.82	1742.29	1615.77	1195.31	1981.99	1620.43	1999.92	2114.89	940.184	886.777	570.401	1005.75	1425.94	1640.51	1514.69	1382.66	1213.51	1555.55	1053.16	1892.82	1861.98	2420.81	1889.78	2047.19	831.466	200	1033.99	756.892	1181.93	1348.6	833.269
Peak_02734	-0.0331044	323.052	835.839	945.308	1140.06	663.187	820.803	989.307	758.99	1187.97	933.125	939.742	977.73	969.325	1150.34	857.84	957.063	200	738.103	1402.17	1182.59	855.642	880.144	509.193	1084.78	905.435	907.159	934.221	979.624	1063.16	891.458	989.53	976.048	973.78	731.66	779.261	849.362	1127.71	1134.06	897.189	638.63	921.327	958.506	200	1037.3	869.695	963.829	1235.72	895.938
Peak_02735	0.654009	323.078	1358.72	1436.36	1511.39	1471.58	836.525	1323.73	1578.94	1605.39	1803.17	1704.67	2171.2	2199.68	1666.58	1380.95	1667.05	777.853	1163.52	1242.3	1759.17	1179.39	1211.81	1061.72	1705.63	1004.36	1849.72	1532.2	2013.16	2115.97	1625.97	1674.98	1857.43	2096.21	1691.27	2061.86	1936.72	2631.07	1546.93	1575.97	1808.88	1975.11	2164.35	1781.18	2745.97	2400.53	2107.23	1921.11	2088.95
Peak_02739	3.26168	323.128	808.588	731.162	808.804	1048.28	990.535	729.658	896.973	957.4	972.531	1112.33	1238.62	1518.17	1397.11	1146.09	1207.89	1016.58	959.404	1141.79	1050.26	963.135	908.075	795.774	879.407	635.527	1484.42	1321.84	1341.69	1546.02	1627.05	1462.74	1425.09	1758.37	783.467	1298.55	1145.12	1162.22	872.875	817.018	1099.42	1026.44	1346.94	1039.38	1364.73	1489.63	1351.25	987.148	1220.15
Peak_02740	3.77045	323.129	2387.06	2061.61	2143.25	2496.55	2863.01	2047.39	2189.92	2287	1225.29	1569.99	1632.26	3107.85	1959.9	1710.34	1781.04	1319.81	1238.8	1917.32	2352.41	2016.39	2059.14	2401.74	2437.82	1828	2543.43	2367.79	2157.19	2488.71	2051	2327.18	3046.44	3513.15	2273.32	3007.96	1989.25	2904.38	2078.2	2405.66	2738.99	3240	845.44	745.253	947.262	1696.1	934.632	812.136	1116.26
Peak_02749	-0.0909927	323.331	754.393	572.096	200	200	743.186	564.412	888.309	737.809	485.796	510.771	496.52	533.419	707.737	531.825	200	200	660.726	573.79	808.812	601.836	780.82	200	751.617	200	735.584	782.041	894.796	677.608	440.085	448.44	778.628	532.442	528.125	669.725	628.767	861.739	593.71	696.966	200	617.014	393.86	517.247	666.857	200	588.755	570.749	541.588
Peak_02751	0.697057	324.081	238.755	212.738	305.72	181.778	200	136.96	211.409	309.406	274.977	305.293	219.244	264.196	225.329	162.067	136.723	200	171.165	248.751	234.977	199.291	129.874	200	215.385	140.098	256.656	239.138	358.728	333.555	237.114	227.954	215.007	266.176	203.748	270.11	294.356	247.921	223.773	129.946	227.49	291.716	380.381	227.327	414.239	375.817	287.404	294.828	349.963
Peak_02752	3.78724	324.132	578.505	317.04	325.94	493.095	482.085	471.088	334.569	689.264	217.019	241.382	346.847	541.847	488.21	309.177	242.675	411.049	413.731	370.242	391.69	824.088	514.513	508.766	523.693	452.77	369.263	497.593	428.517	513.907	477.445	468.311	527.214	874.47	428.456	565.984	446.508	616.194	391.506	494.228	626.068	569.295	200	200	200	200	200	200	293.265
Peak_02761	2.38019	325.069	391.897	429.135	324.873	181.29	512.919	318.292	375.714	267.067	258.598	318.344	320.402	200	384.818	442.78	256.242	321.314	200	345.684	399.488	200	249.309	200	346.363	256.053	303.55	415.598	257.826	214.543	410.674	320.592	444.479	256.851	314.559	271.623	309.292	438.892	352.988	316.007	357.138	350.005	200	200	200	148.037	211.863	189.956	200
Peak_02762	2.54452	325.069	604.55	490.714	481.723	399.985	839.575	622.004	558.241	507.163	300.221	472.568	575.732	470.273	761.047	411.428	426.822	548.802	778.435	437.13	329.923	440.038	606.776	707.242	486.699	631.381	441.459	311.496	400.286	393.119	573.127	648.456	428.592	361.854	424.675	254.207	326.428	187.945	638.822	482.637	416.186	487.523	415.552	774.018	839.299	585.186	758.833	631.258	534.759
Peak_02764	3.27847	325.093	13916.8	12413.1	13044.2	14168.8	15357.6	10805	13190	13186.8	9415.91	11640.6	12924.8	13035	10619.9	9245.54	13044.9	9815.59	10623.6	14334.7	12863.2	10554.7	14299.5	9304.61	12721	12131.7	8969.53	10140	10147.8	11211.8	9211.24	8919.1	11405.1	10231.9	15436.5	14487.3	12279.9	13194.8	15567.6	13701.4	12370.1	14951.2	8461.53	9297.34	14631.8	11214.4	9021.48	8319.15	13027.1
Peak_02766	3.92148	325.093	1576.89	1411.62	2137.94	1551.06	2262.86	2599.79	1531.61	3341.37	200	94.6551	200	200	200	200	200	200	2502.89	3021.81	3200.68	4323.65	2747.49	1293.07	3447.03	3264.16	613.157	715.155	899.109	730.174	200	916.377	930.626	1208.15	3416.25	4587.35	3751.12	5402.79	1151.95	1853.96	4368.35	3750.58	200	200	1086.9	660.954	200	200	200
Peak_02771	0.640272	325.115	9228.41	7442.37	9080.15	8064.58	7037.67	8035.06	8048.2	8235.22	11199.9	9234.48	12364.8	12513.3	8742.78	8281.2	8061.68	4116.98	6635.55	6463.44	8228.41	5539.06	7644.33	2517.94	7616.54	5472.12	11022.5	11717.7	11843.2	11837.8	11029.7	10099.4	10488.9	11726.1	8810.24	7637.02	9685.91	9352.72	9148.1	6322.49	8010.95	9565.08	11359.2	8950.91	12368.4	10437	9987.89	8422.92	9650.56
Peak_02774	2.52785	325.113	200	200	200	107.911	22.2557	200	200	200	176.01	200	426.941	263.487	44.1664	81.6381	61.487	200	200	200	200	200	200	200	31.9821	200	48.662	70.8434	200	200	200	75.2168	173.605	176.901	27.6472	200	200	146.211	275.076	101.863	51.308	271.281	109.912	357.401	630.251	220.437	533.664	252.74	468.827
Peak_02775	3.31204	325.108	4696.27	5336.09	3589.72	5347.29	3307.31	3908.08	4680.19	4401.62	2909.96	3895.57	3996.14	4379.66	3233.41	3482.97	4273.26	2283.84	2459.47	3674.99	4033.33	2623.67	4796.04	2104.52	4647.53	3997.51	3692.06	3496.6	3627.36	3666.39	2137.51	3630.97	4274.29	3602.77	6545.32	4560.46	3004	5426.97	5537.44	5385.94	5349.87	4325.88	4030.3	3608.08	3576.9	4587.77	3600.33	2579.08	3000
Peak_02776	3.52972	325.111	1238.1	1353.16	915.917	1264.76	1264.93	865.665	1161.62	1388.75	742.839	1031.89	977.876	1146.46	713.47	722.714	906.329	627.297	643.493	1276.33	872.511	746.741	1365.36	537.651	1044.69	1083.53	988.187	806.427	1004.66	1181.45	571.799	631.868	965.258	938.962	1699.68	1378.15	1071.19	1226.97	1304.02	1186.46	1353.64	1491.12	767.314	1013.73	1297.22	1027.71	918.01	688.125	1048.01
Peak_02777	0.913642	325.13	1163.1	1071.78	1022.68	999.504	533.513	1344.14	1076.39	994.903	1399.23	1003.93	1581.76	1473.2	1217.49	1330.06	1244.42	296.359	682.607	574.391	951.704	392.481	936.326	536.145	1063.05	576.49	1786.41	1620.52	1610.67	1407.1	1221.89	1674.52	1757.81	1801.59	1284.11	960.498	1046.24	1425.96	1189.06	1016.98	1324.74	951.818	1948.06	1279.64	1160.66	1569.03	1373.98	883.505	957.105
Peak_02778	3.37908	325.142	232.754	221.894	137.349	223.643	244.319	209.321	187.207	224.685	196.437	219.405	206.107	264.175	202.285	219.016	280.292	256.877	77.377	172.188	190.35	178.071	171.865	75.6881	116.288	117.508	227.359	158.2	187.862	134.696	211.175	173.78	238.334	276.973	157.45	252.994	265.167	191.855	177.652	173.044	169.635	236.912	268.987	272.645	392.23	247.873	230.105	160.028	233.172
Peak_02788	7.25038	325.294	6839.07	5563.79	4146.42	6175.51	5768.29	3766.73	5939	2842.35	4049.59	4307.41	4641.05	5353.93	4538.61	5798.01	6474.9	4621.99	2588.54	3041.21	3944.04	3710.57	5269.59	4044.75	4341.95	3354.39	6380.99	2457.15	1488.85	3573.25	4001.08	6441.65	6599.65	5616.1	4453.09	6481.99	5248.89	6181.33	3747.43	5772.46	5670.2	5029.13	5289.76	4094.78	5299.21	6612.48	5039.8	5303.58	4534.99
Peak_02789	7.36822	325.309	1001.54	937.07	534.8	1030.77	555.487	479.538	901.642	452.687	510.048	650.551	539.12	868.359	716.814	851.45	952.094	565.383	350.718	363.268	549.762	414.016	760.049	349.377	803.505	498.439	1151.84	249.764	85.7261	508.942	465.1	1162.93	1246.18	939.489	756.137	1026.04	701.934	1110.2	485.391	923.266	1038.03	689.504	866.174	743.752	748.494	1096.46	979.857	533.904	662.074
Peak_02793	3.36229	326.096	2280.91	2324.56	2092.7	2318.46	2101.71	2006.44	2057.59	2157.54	1626.88	1831.79	1954.31	1900.08	1757.26	1542.32	2082.63	1433.13	1593.73	2212.16	2183.83	1569.04	2456.27	1365.01	2107.58	1984.1	1561.92	1737.02	1753.71	1884.43	1374.84	1713.99	2026.2	1702.79	2387.38	2375.7	2073.73	2256.81	2517.84	2125.44	2026.73	2707.34	1361.74	1742.29	2464.81	2113.08	1462.68	1480.09	1944.15
Peak_02795	0.674908	326.118	1323.41	890.421	1150.49	1160.07	1046.3	1186.54	1036.7	1202.5	1673.12	1540.24	1550.2	1648.79	1287.26	1292.22	1288.26	417.839	867.804	840.551	1222.42	716.982	984.051	663.584	1027.97	733.987	1358.35	1736.55	1646.25	1759.59	1508.23	1502.55	1396.87	1499.95	1251.7	1299.47	1552.77	1326.04	1274.41	879.913	1067.05	1351.76	1782.57	1376.74	1828.86	1451.36	1473.49	1336.55	1275.02
Peak_02796	3.37908	326.114	360.322	269.081	264.654	385.827	364.799	264.711	266.067	420.792	149.69	328.128	323.098	207.812	150.826	184.547	293.671	168.944	166.551	271.13	242.784	334.807	439.34	358.852	260.109	233.652	177.469	305.417	281.451	239.05	245.739	205.306	302.072	411.053	505.182	368.108	363.28	362.456	301.949	365.706	376.12	326.051	145.986	207.901	320.409	270.326	176.997	177.044	246.666
Peak_02797	7.28427	326.296	1824.6	1529.64	1123.86	1626.72	1469.2	938.908	1530.63	737.228	1177.67	1436.31	1109.95	1354.16	1118.96	1579.28	1572.13	1232.26	1435.71	770.778	1027.47	620.363	1354.31	972.478	1324.44	961.516	1736.9	615.683	200	953.66	873.898	1570.41	1903.42	1484.3	1109.17	1641.64	1363.86	1906.07	1528.09	1782.12	1338.77	1385.24	1412.68	1248.49	1342.33	1904.36	1478.63	1501.46	1271.88
Peak_02799	8.94331	326.379	794.604	1204.15	352.666	399.018	849.808	399.628	389.048	560.105	791.666	533.148	430.261	373.883	1334.51	543.818	570.452	253.344	318.153	368.791	262.056	214.839	401.479	338.237	393.111	804.939	712.051	3247.07	723.83	322.935	556.349	1277.88	1133.96	185.049	407.049	442.136	454.902	565.235	522.036	502.595	380.985	782.204	1102.19	234.184	1030.13	200	200	480.602	363.077
Peak_02809	1.33286	327.106	771.937	850.551	679.849	729.875	798.817	864.621	698.868	785.553	600.536	593.086	603.281	506.419	559.973	449.602	344.199	326.121	686.103	764.786	845.214	587.648	913.269	400.995	900.011	738.756	544.972	333.826	355.984	664.931	638.587	452.025	528.744	582.15	810.705	736.087	671.764	919.58	1093.24	811.806	761.522	962.203	354.681	367.624	591.922	429.505	428.367	388.687	416.088
Peak_02811	0.746939	327.12	254.121	240.263	195.635	255.308	251.132	170.68	164.588	200	237.125	300.734	284.619	366.154	286.021	200.392	245.715	200	200	200	234.276	200	200	200	209.118	200	301.372	307.02	388.149	228.179	316.395	232.384	269.231	322.644	318.709	265.178	267.083	228.838	179.298	165.701	231.852	197.88	304.25	163.83	342.435	320.825	280.152	222.486	304.073
Peak_02818	2.82471	327.202	316.751	344.504	200	200	379.595	349.649	479.724	481.992	406.708	314.562	265.328	383.239	433.496	284.624	308.776	389.391	363.368	2171.43	1165.79	200	373.467	346.753	859.24	5854.37	515.739	27913.9	47005.9	610.332	506.843	450.089	476.594	349.299	385.401	285.227	390.622	346.926	359.666	348.147	349.607	200	316.244	353.928	439.62	514.176	427.714	351.16	489.895
Peak_02824	6.42627	327.252	739.302	904.347	736.764	642.021	1188.16	720.416	762.96	798.351	874.295	832.304	704.375	749.686	732.162	637.925	719.444	623.71	748.939	411.591	740.598	575.578	815.93	857.347	758.447	451.589	673.286	200	200	504.145	921.742	759.378	726.409	845.781	612.284	699.47	804.151	666.243	676.039	662.132	806.084	957.036	583.334	539.911	899.813	780.621	687.706	734.813	788.884
Peak_02826	7.31785	327.3	318.626	302.834	218.557	359.143	303.809	256.047	320.042	200	52.0818	345.455	238.303	317.778	229.805	302.144	296.165	257.05	220.692	239.617	133.039	280.764	293.39	372.431	188.751	250.16	393.085	200	200	200.125	149.786	298.084	321.813	327.077	249.668	361.07	282.86	389.11	311.97	342.905	317.451	253.08	273.296	209.859	308.46	359.348	269.401	417.953	219.03
Peak_02834	0.713649	328.071	287.83	362.535	317.898	196.8	230.117	249.133	359.377	200	485.258	490.086	297.723	596.8	537.212	369.271	311.748	200	200	387.408	450.247	200	222.121	200	308.146	220.112	268.893	496.965	312.8	588.815	392.682	469.094	295.003	352.163	292.67	401.793	407.629	498.163	514.979	291.699	538.337	341.822	515.599	431.367	437.925	610.118	409.769	521.722	386.387
Peak_02848	0.592674	328.899	737.293	784.315	799.541	469.399	1030.39	797.411	634.644	641.763	200	200	433.428	200	200	200	200	200	476.191	200	616.048	200	816.802	200	540.793	200	568.172	563.382	625.002	319.016	200	192.83	404.331	383.95	531.804	784.308	668.185	508.515	863.908	353.57	672.51	620.137	741.186	621.29	997.921	606.792	861.866	578.203	413.523
Peak_02849	0.654009	329.008	213.918	227.933	236.17	288.032	80.9985	235.096	247.266	252.465	291.552	219.893	258.72	299.141	196.916	207.325	209.098	200	153.314	188.83	173.302	138.792	223.47	105.292	212.122	161.576	250.74	239.354	199.318	361.972	194.921	130.201	173.943	263.956	166.86	234.688	221.538	152.126	200	122.592	140.531	242.049	200	200	134.762	290.387	200	233.093	130.881
Peak_02852	2.90844	329.124	1702.78	954.145	1150.17	1009.71	1655.99	1701.04	1215.35	1475.03	560.062	405.392	663.301	655.727	763.552	527.287	579.396	200	1321.46	890.5	870.134	842.496	1378.47	872.891	1225.65	881.134	854.203	703.865	626.383	656.098	855.176	691.865	736.858	929.055	1212.97	1020.32	864	1236.47	1012.28	1139.36	1451.93	1405.44	353.577	497.398	1030.73	537.533	745.097	713.325	634.986
Peak_02853	3.36229	329.139	320.166	315.586	348.593	391.525	429.897	261.835	279.637	313.9	396.531	499.605	536.084	861.154	495.103	467.778	601.716	599.363	304.067	405.737	393.119	414.642	269.981	200	340.464	243.11	674.472	710.786	637.955	846.848	732.675	639.797	799.158	741.955	266.465	484.355	464.485	390.993	283.613	427.856	381.182	372.96	632.979	575.56	661.865	764.071	557.085	485.803	671.692
Peak_02854	6.54393	329.161	942.781	1131.21	987.873	918.533	1243.15	952.379	1008.94	1004.93	899.728	869.896	958.442	1003.58	948.206	1083.81	1102.51	624.834	1081	493.924	941.149	582.782	967.842	1037.17	985.097	628.849	1026.33	601.406	451.236	823.607	1050.28	1084.69	1130.31	881.331	804.674	880.622	1058.41	977.746	883.748	923.077	928.239	1140.06	795.561	749.415	1056.82	1065.77	1096.7	1020.91	1013.55
Peak_02880	0.581901	330.932	1047.53	590.085	720.274	567.116	200	880.084	616.762	665.67	690.009	629.88	522.938	677.3	827.159	565.851	372.766	200	707.497	522.728	718.691	412.597	750.851	476.529	576.234	475.112	683.311	731.789	805.602	650.868	665.008	562.236	566.609	567.863	602.615	619.106	834.464	601.197	700.489	514.564	635.306	674.195	789.736	836.107	1135.21	806.197	907.918	691.159	575.811
Peak_02885	4.57608	331.084	293.991	383.466	200	237.717	391.714	251.79	387.368	200	371.774	350.283	333.266	532.744	483.436	397.936	323.017	335.29	200	200	387.379	200	212.409	200	170.415	221.361	426.198	353.083	279.967	378.371	400.863	408.913	380.551	330.748	286.606	212.667	200	222.432	298.305	497.629	308.426	333.084	383.272	334.801	372.853	388.843	365.502	396.627	200
Peak_02892	3.77045	331.21	266.233	418.568	275.05	354.342	364.099	362.521	363.25	351.059	352.755	391.731	463.487	426.139	298.2	377.88	317.03	295.166	329.271	380.935	200	388.51	283.889	200	322.341	298.845	331.231	200	200	302.498	293.863	358.181	371.147	325.507	323.412	444.37	386.925	371.179	288.501	349.465	266.274	351.392	366.094	368.298	508.934	368.312	509.721	375.561	528.115
Peak_02901	0.847468	332.109	272.671	226.121	237.313	133.977	200	170.27	175.751	126.084	399.256	251.079	464.284	495.638	334.876	239.58	228.897	1.38034	130.217	316.349	204.15	243.513	215.073	200	183.681	200	512.77	490.382	640.028	469.6	407.435	389.981	377.446	361.755	230.242	243.207	183.49	270.844	191.251	172.381	217.367	146.933	513.538	598.693	856.949	604.439	533.108	584.328	501.213
Peak_02903	0.763696	332.136	7488.15	7964.21	7854.02	6632.51	5887.02	6260.67	7721.25	6031.37	10281.7	8908.25	11734.7	11106.5	13077	10566.4	9420.77	5578.49	5555.1	6621.69	8404.29	5305.72	7107.94	2686.81	7874.95	5411.5	11375.1	11431.6	12387.9	12941.2	13264.8	11263	14219.1	15123.7	8110.46	7943.75	9116.44	9224.72	7963.23	7636.88	8458.92	9057.57	11321.1	11312.9	16995.5	13038	15637	11556.1	11399.5
Peak_02905	0.797242	332.155	863.055	841.673	802.289	702.312	442.896	611.715	883.367	657.292	1140.82	955.83	1198.68	1248.44	1451.77	1329.59	1010.82	498.593	606.444	475.741	791.12	413.519	742.893	266.296	803.48	481.887	1541.03	1374.18	1325.52	1474.36	1295.99	1667.16	1633.53	1673.84	1053.55	810.224	763.955	1134.08	984.825	1008.21	1056.03	964.608	1315.6	1416.2	1704.2	1618.59	1874.98	1396.22	1084.59
Peak_02914	0.581901	332.965	544.618	316.947	321.49	402.306	229.532	287.047	317.898	200	393.086	371.299	475.819	533.322	664.394	526.49	444.544	404.237	482.037	200	361.534	200	462.417	200	453.18	500.521	502.498	535.211	511.541	493.557	645.027	627.257	516.227	688.103	200	464.264	512.675	616.792	527.239	332.82	200	439.593	620.17	514.751	611.518	552.51	566.748	607.822	457.271
Peak_02917	0.830715	333.048	200	200	200	32.5495	247.092	136.399	266.982	406.831	12.8297	200	200	463.198	200	195.735	200	200	64.9243	97.4257	200	200	18.2242	200	76.9178	126.415	45.3176	45.3723	96.208	33.4945	809.769	65.2526	42.2396	651.892	200	200	511.88	90.7712	185.789	229.295	200	647.697	92.3594	90.1729	97.2373	234.899	138.711	244.703	137.846
Peak_02919	3.27847	333.109	3234.9	3396	3409.65	3334.63	4111.06	3342.79	3449.94	3812.86	1886.58	1793.1	2422.03	2530.29	2480.12	1956.01	2270.04	2111.5	2411.41	3854.2	3397.93	2952.57	3430.52	2184.72	3406.64	3132.37	2374.39	2259.57	2313.58	2553.4	2754.91	2613.53	2418.8	2959.85	3305.33	3968.72	3584.09	3642.06	3472.65	3395.58	3696.95	4149.19	1709.57	1837.45	2655.01	2075.96	2112.1	2023.32	2434.21
Peak_02923	0.780457	333.139	1111.55	1103.4	1234.88	971.95	786.642	975.908	1093.86	1018.56	1559.53	1496.45	1631.82	1873.78	1751.68	1655.63	1258.55	942.382	929.328	949.804	1201.75	876.741	1149.64	527.974	1108.33	719.41	1631.57	1769.89	2026.27	2183.15	2121.23	1705.41	1934.33	2301.73	1265.09	1282.42	1600.05	1346.1	1269.26	1169.94	1070.55	1433.08	1695.23	1781.33	2516.13	1942.91	2364.95	1777.5	1798.32
Peak_02934	7.06506	333.302	3106.94	3730.05	2440.09	3040.58	2947.31	2709.4	3124.36	2780.19	2310.02	2902.76	2676.4	4786.13	3486.88	3009.15	3033.24	2365.79	1804.76	1673.38	3201.56	1694.37	3183.09	2183.18	2701.2	2328.71	3728.68	950.396	635.466	1916.36	2547.23	3027.48	3784.72	3082.97	3145.28	2333.65	2722.95	3378.9	2772.54	3292.81	2937.13	3441.33	3022.62	3177.97	3222.2	3330.45	2914.82	3180.81	2591.41
Peak_02939	3.31204	334.115	787.989	805.626	729.799	771.18	872.87	855.522	868.722	832.253	413.975	394.844	546.69	484.34	542.398	462.917	485.08	423.408	693.172	724.454	852.328	620.037	878.537	955.905	726.023	713.023	540.4	371.859	522.754	788.321	595.268	571.055	541.105	645.042	670.556	896.62	719.523	892.362	818.857	743.419	825.89	874.746	458.217	364.798	555.257	495.739	389.172	526.093	451.559
Peak_02940	2.31148	334.114	1405.06	1267.93	1407.12	1259.85	2107.33	1771.33	1735.49	1682.07	1151.83	1060.84	1332.57	1243.81	1298.11	1071.37	1270.71	962.447	1124.21	1190.01	1169.02	1102.99	1365.26	626.052	1306.53	1069.48	1207.04	1229.43	1419.46	1126.55	1333.58	1302.4	1188.59	1261.57	1109.76	1240.24	1315.56	1244.3	1218.42	1072.41	1400.7	1533.46	1094.72	1291.85	1560.2	1568.19	1343.35	1084.27	1282.17
Peak_02941	1.78471	334.114	441.933	521.524	508.506	407.972	639.619	352.558	432.886	535.966	219.845	421.111	200	370.958	519.779	249.033	309.24	282.979	424.995	494.402	560.248	580.585	447.508	180.971	344.495	287.635	393.017	314.484	348.399	389.47	277.348	258.632	270.575	239.722	362.547	430.782	466.503	390.986	486.008	352.619	375.973	485.763	209.942	207.318	366.021	393.069	335.462	266.804	200
Peak_02947	7.06506	334.304	485.607	682.505	327.162	511.855	642.506	478.906	534.437	486.864	355.417	597.689	542.068	908.306	613.264	604.669	499.213	554.933	492.391	530.234	519.661	425.275	572.559	586.376	427.526	348.169	641.212	200	200	370.08	561.427	673.993	564.281	512.274	667.724	641.995	564.836	750.993	508.445	617.285	612.516	641.725	576.856	615.202	781.689	689.053	575.796	625.719	620.229
Peak_02953	0.730278	335.076	5276.83	4228.1	3959.65	3793.75	3499.47	4829.98	4500.68	4003.33	5904.27	5035.86	5993.22	5818.95	4918.47	6027.44	6060.24	2949.65	3952.7	3289.63	4062.27	3064.58	4997.27	1682.61	4415.15	3319.33	5625.03	4199.97	4815.91	4824.46	5435.18	5668.4	5526.66	7023.6	4256.52	4055.62	3866.12	4563.64	4897.48	4082.93	4558.87	5357.24	5450.98	5416.89	7548.6	6155.07	7823.4	7302.31	5444.35
Peak_02955	3.78724	335.092	428.86	200	327.413	579.287	474.512	330.159	324.876	240.449	223.515	385.998	300.536	294.85	362.739	269.353	200	293.1	375.415	302.111	200	295.829	200	337.039	367.344	200	224.963	200	200	200	219.308	368.692	239.199	200	303.909	362.165	234.277	339.907	377.082	474.082	384.756	486.743	200	248.052	411.843	200	266.398	287.207	229.387
Peak_02956	4.25673	335.092	389.843	381.995	501.594	367.289	400.539	315.674	360.715	376.135	200	200	241.113	279.917	182.149	152.696	200	253.683	215.744	231.228	343.191	404.345	376.121	280.207	395.427	269.831	200	200	269.969	230.796	283.559	146.69	200	285.644	325.347	409.267	427.747	415.562	338.087	404.709	320.551	503.914	200	200	262.589	214.623	186.454	200	181.676
Peak_02957	0.847468	335.09	1081.68	859.49	698.107	924.994	444.283	925.305	1079.24	697.63	1404.44	911.334	1220.92	1471.84	1013.07	1536.47	1322.51	458.156	667.725	453.044	804.013	420.036	1055.56	325.221	1247.9	750.953	1336.82	946.844	1079.36	1004.28	911.954	1346.54	1515.75	1824.94	1102.4	749.233	589.08	1174.94	886.354	1116.98	1239.66	1227	1512.81	1331.55	1445.58	1468.43	1679.12	1482.5	1127.08
Peak_02958	0.930396	335.089	937.829	765.167	555.885	755.534	374.656	643.332	865.913	533.345	1162.18	775.218	1008.68	1105.53	717.09	1328.77	1084.91	316.945	522.564	440.515	761.601	372.144	876.27	286.556	950.053	604.9	1139.64	669.043	937.551	856.561	798.579	1155.31	1265.72	1393.07	828.751	698.878	451.234	981.325	686.983	916.191	1095.97	1044.69	1239.25	927.266	1182.57	1192.01	1241.09	1145.89	958.155
Peak_02960	6.15776	335.127	1880.38	1831.07	1074.92	1518.88	1596.36	1182.78	1556.54	1424.24	1288.16	1234.23	1489.39	1501.92	1417.99	1797.5	1300.69	1030.04	1105.28	761.619	1329.47	926.904	1663.03	1822.59	1381.87	752.413	1615.21	200	200	707.681	1296.69	1581.8	1586.12	1443.1	1221.68	921.677	1409.06	1437.37	1099.01	1590.56	1454.77	1524.06	1470.56	1244.53	1665.2	1640.76	1471.95	1582.33	1414.69
Peak_02970	5.84194	335.276	510.34	631.236	483.442	524.603	630.466	432.724	571.242	561.413	526.535	534.627	525.102	588.407	557.164	469.355	415.39	415.88	488.788	464.297	481.547	437.189	577.073	653.958	470.724	428.139	535.239	325.862	430.002	431.63	556.572	591.379	711.123	490.996	411.576	547.995	569.946	529.298	493.655	545.492	391.62	617.159	555.032	601.492	604.163	608.332	528.737	458.745	602.173
Peak_02976	-0.0909927	335.332	870.854	982.62	904.361	654.972	631.733	1052.31	789.872	892.867	1012.16	857.206	944.191	857.165	1096.79	880.979	905.215	955.773	200	665.78	857.314	741.709	853.441	696.079	958.082	1027.42	896.478	1040.85	874.806	888.152	796.916	200	835.11	843.95	1000.12	1086.6	867.138	916.083	851.488	1002.57	670.313	824.187	764.144	1053.97	914.289	720.603	956.529	830.431	860.623
Peak_02979	0.746939	336.078	584.073	488.888	495.122	484.686	576.823	717.231	550.378	456.958	658.583	479.717	675.761	751.05	597.485	693.481	517.313	272.778	527.201	607.601	351.564	489.663	556.828	364.302	534.545	313.987	576.114	473.805	423.946	497.838	669.669	689.916	678.82	873.525	481.788	465.849	432.799	582.725	420.341	393.408	525.454	623.856	556.545	501.841	968.199	766.357	986.895	879.942	679.874
Peak_02981	6.17454	336.129	282.831	427.044	199.468	288.538	241.578	305.563	447.813	258.531	200	200	218.373	234.517	131.924	181.681	200	181.004	269.05	200	302.183	200	188.251	417.465	179.842	200	271.778	200	200	200	252.489	200	318.239	229.363	315.679	200	315.092	287.837	200	314.886	224.789	275.005	200	200	193.396	277.611	272.211	268.167	200
Peak_02989	0.646968	336.844	1230.61	1352.27	1184.98	903.697	1348.34	1317	1280.81	1509.42	675.683	745.621	726.998	468.283	913.922	675.099	736.949	811.773	1002.04	1531.47	1187.01	655.943	1504.64	835.711	984.914	1101.83	438.204	451.862	200	200	524.225	485.587	564.67	360.14	780.038	968.812	768.42	875.971	1451.03	1348.42	849.085	1008.33	505.535	200	200	362.956	200	200	361.396
Peak_02990	0.654009	336.951	627.62	686.977	603.064	643.297	324.728	623.733	799.509	788.463	405.347	420.184	282.231	296.303	460.585	440.826	322.076	200	692.065	565.389	550.35	566.344	670.463	565.463	749.732	622.185	253.158	260.327	166.197	483.383	330.521	289.336	326.109	288.131	740.666	736.097	344.425	846.702	777.471	736.24	606.135	677.713	195.566	200	209.012	247.826	248.022	323.184	313.083
Peak_02992	0.730278	337.081	3259.88	3487.09	3029.87	3112.39	2244.75	3073.16	3450.39	3096.93	3969.79	3815.84	4327.57	4123.64	4101.42	3909.49	3391.94	2045.35	2545.44	2519.01	3400.82	2003.32	3122.64	1395.32	3692.07	2355.86	3448.05	3280.39	3426.69	3980.73	3386.08	3392.79	3812.5	3977.64	2789.71	3018.69	3181.95	4156.87	3029.84	3279.27	3507.9	3422.2	3877.42	3811.36	5738.03	4696.07	4479.67	4668.91	3885.76
Peak_02993	2.51112	337.093	1252.81	1020.31	1281.1	926.871	1474.9	1009.61	869.684	911.731	495.279	651.126	880.794	687.191	397.231	587.049	424.55	421.593	679.722	1296.92	1030.11	834.668	954.644	1016.17	957.44	780.74	793.455	562.252	634.988	511.468	878.528	612.869	782.043	850.704	984.467	1233.48	950.42	1332.03	871.449	1005.62	1154.14	1321.02	404.716	200	570.386	279.544	200	200	329.233
Peak_02994	3.02582	337.093	1654.77	1576.06	1376.08	1696.77	2406.17	1669.55	1847.71	1417.71	728.325	971.306	641.587	944.028	1162.31	1140.8	890.324	914.35	974.159	1390.85	1345.7	959.647	1817.29	966.592	1760.83	1626.58	697.277	602.145	485.819	754.932	797.353	941.357	801.255	611.01	1140.42	1148.82	700.881	1379.45	1605.08	1587.7	1307.45	1508.59	392.917	200	554.261	376.363	200	471.3	507.991
Peak_02995	2.79196	337.093	200	200	200	307.348	200	200	258.471	416.602	401.422	200	520.993	764.515	516.268	521.823	576.83	200	200	200	324.253	200	200	200	200	200	645.242	646.175	661.408	815.324	838.93	864.031	800.955	940.854	200	200	650.188	403.081	200	236.037	420.504	200	790.207	580.78	523.921	822.636	653.549	668.749	902.533
Peak_02996	0.713649	337.112	665.261	654.351	645.834	488.358	302.921	406.712	553.025	578.401	640.513	543.178	651.528	699.172	618.661	707.515	461.673	322.178	597.747	458.857	446.663	329.335	587.137	232.195	647.929	355.025	562.953	679.13	775.623	566.425	617.546	529.467	577.793	689.135	598.753	452.895	489.738	733.287	533.811	570.621	587.024	565.312	658.961	543.919	781.36	733.734	621.402	652.274	542.761
Peak_02999	3.9885	337.165	338.558	200	260.855	87.2522	221.546	302.244	276.065	337.126	200	352.528	300.275	438.474	313.001	338.224	337.335	200	200	200	200	200	200	316.255	200	200	404.8	466.489	338.582	334.881	455.926	469.066	580.308	436.978	219.485	220.043	197.039	267.355	190.173	329.919	321.387	434.606	203.432	273.973	519.54	454.671	321.331	361.27	444.759
Peak_03008	0.54542	337.971	2465.92	2342.57	1967.1	2223.62	1236.75	1981.04	1948.86	2145.33	2775.89	2206.69	2911.78	3784.59	2757.11	2602.24	2372.88	1528.41	2097.31	1669.05	1817.89	1307.34	2158.5	1268.03	2315.62	1828.52	3044.09	3394.57	3349.53	3720.16	2959.55	3194.17	3509.34	4066.92	2015.03	2174.45	2075.9	2552.34	2413.09	2181.67	2419.45	2901.99	3264.67	2672.07	4179.2	3393.99	3296.82	3405.26	2887.82
Peak_03009	0.780457	338.065	454.437	372.224	358.417	439.455	432.141	422.453	359.532	344.524	239.326	298.512	195.125	340.484	292.16	380.45	264.847	240.712	340.118	364.033	299.132	281.965	392.216	200	418.611	323.834	311.898	270.83	173.425	216.549	177.032	222.583	182.999	255.704	298.067	118.731	413.024	369.661	449.795	275.366	320.272	357.724	341.296	305.175	351.703	259.931	524.192	408.77	460.748
Peak_03011	0.746939	338.094	446.689	472.337	354.191	426.198	425.028	495.021	509.859	411.363	612.758	625.839	650.98	576.217	474.464	598.787	388.548	268.897	418.273	298.459	376.37	298.017	392.115	193.128	398.832	338.661	516.816	487.186	532.812	471.104	518.402	430.044	474.157	552.816	459.026	431.535	461.673	457.348	436.802	449.072	426.417	519.024	535.227	688.071	814.36	649.182	672.402	814.233	633.548
Peak_03013	1.40511	338.147	15605.8	12056	10988.9	11026.2	13223.9	16464.9	12696.1	13734.6	9034	7928.32	9544.59	7687.56	10942	7880.01	8501.52	3702.21	10507.6	12239	12589.7	9256.01	16763	6905.63	13024.7	12255.8	8279.5	7570.24	6946.64	6679.22	7555.97	8132.89	8262.21	7356.14	13941.8	12384.1	10873.4	13210.8	16123.1	12569.4	14326.1	16556.8	6286.28	6674.33	9397.25	6416.76	8901.11	8247.67	8121.98
Peak_03025	8.79487	338.344	11077.9	14444.8	12746.9	24889.3	4344.95	6562.52	10356.5	9750.75	11406	5276.67	2645.56	7511.41	3531.28	2432.81	10507.2	4592.32	11354.5	15695.4	8120.3	5701.45	7682.25	6257.81	21178.1	12334	15561.6	9298.9	5452.68	7414.37	13010.9	9789.5	21668.7	8563.56	9384.52	10333	5524.62	5969.73	8601.34	7347.63	5379.68	10657.1	7938.95	7414.93	7721.67	9894.91	10765.2	3676.91	11553
Peak_03026	7.13249	338.342	200	382.021	430.738	682.578	200	528.115	381.693	200	459.24	531.448	141.77	685.338	600.543	313.885	610.373	200	200	523.312	593.491	334.095	378.214	591.749	540.048	283.548	360.76	642.686	402.57	453.419	1063.1	445.943	200	338.494	374.466	589.246	572.618	393.595	200	322.374	393.079	358.976	200	591.553	296.264	200	325.628	439.587	329.022
Peak_03027	7.55281	338.343	1177.81	917.55	980.064	950.766	1393.97	802.121	1145.98	761.31	638.325	928.375	918.66	200	918.059	892.379	999.455	1049.25	499.429	716.51	855.69	945.663	991.338	999.642	968.298	755.871	735.02	200	200	644.647	200	1033.24	734.616	1085.71	912.717	671.042	961.173	820.969	565.016	953.831	1122.5	902.813	849.004	783.801	761.465	1185.62	1161.38	661.616	815.46
Peak_03030	9.02655	338.359	480.038	1039.45	598.685	1222.21	218.568	679.053	477.454	535.63	634.073	305.468	95.2667	420.735	303.564	185.304	537.873	171.311	649.564	967.784	653.424	207.815	567.377	677.249	968.845	948.081	1206.2	1024.84	398.073	210.127	651.742	611.186	1626.75	359.098	342.558	791.63	335.393	229.95	342.29	235.069	203.811	771.254	252.562	371.312	685.332	628.238	725.342	152.252	562.475
Peak_03037	0.54542	338.972	1260.25	1071.57	1182.18	1099.57	725.614	1058.57	1143.75	1139.93	1572.15	1196.01	1411.74	2074.58	1815.32	1531.15	1167.32	849.738	1006.29	920.107	936.193	708.978	1257.91	740.7	1327.87	919.263	1844.32	1812.43	2159.57	1790.45	1545.73	1851.92	1981.69	2570.98	1024.96	1135.2	1067.04	1461.44	1472.91	1136.41	1389.72	1614.29	1771.83	1504.49	2150.81	1905.7	2022.38	2067.68	1996.59
Peak_03038	0.763696	339.057	290.805	266.582	239.23	269.185	368.48	441.735	236.741	232.231	221.497	133.123	131.591	170.555	325.522	180.76	101.717	200	222.219	339.558	232.845	256.78	319.146	200	381.983	344.9	142.354	232.17	207.592	220.99	243.165	178.154	189.715	177.518	160.837	150.877	125.911	259.01	282.617	238.866	180.534	166.629	292.122	270.056	309.925	239.971	416.187	226.976	248.047
Peak_03039	1.78471	339.069	288.357	364.303	324.003	349.936	425.18	200	311.573	301.572	239.419	319.901	308.76	339.894	317.545	160.026	259.511	200	337.103	443.61	468.985	464.301	428.062	200	351.759	473.708	351.239	187.534	204.458	365.432	200	200	210.888	353.741	268.187	241.371	427.13	235.876	338.742	308.523	413.663	392.444	251.1	188.995	330.621	269.394	291.825	256.838	270.632
Peak_03040	2.31148	339.07	859.7	698.511	852.256	831.976	1087.31	972.659	974.56	1061.55	557.889	456.176	679.941	568.164	748.839	388.62	447.483	530.514	155.673	695.712	636.246	624.926	798.619	445.281	1014.98	615.995	421.425	546.281	640.048	556.454	727.355	566.521	468.506	621.285	599.639	971.475	731.681	840.847	815.01	657.202	860.501	992.669	327.363	349.6	636.842	549.584	384.977	516.117	525.142
Peak_03042	0.697057	339.078	741.678	595.159	643.673	604.792	489.685	566.461	540.63	460.431	566.193	471.971	560.632	627.467	577.062	484.45	332.942	130.134	595.642	473.745	611.548	316.542	679.375	366.325	777.057	507.582	520.602	504.351	446.325	512.116	458.84	520.212	377.895	586.904	657.158	557.08	678.986	582.222	665.236	486.474	694.413	696.45	655.311	534.812	772.9	505.259	794.433	539.348	610.05
Peak_03043	0.730278	339.09	741.678	626.395	643.673	604.792	489.685	707.775	664.293	542.807	783.562	606.969	829.36	852.269	682.594	808.238	389.33	211.821	595.642	475.112	717.22	327.837	679.375	366.325	777.057	508.211	764.796	1060.55	863.204	788.526	696.28	637.11	749.655	852.612	657.158	707.614	839.809	672.046	767.573	656.583	735.117	992.917	910.242	741.622	1128.59	1053.14	922.163	870.649	826.549
Peak_03044	2.99224	339.109	16980.9	18741.2	27207.3	21994	20935.2	15752.5	24114.7	23123.2	13719.5	12831.3	17470.4	32043.6	22350.2	19696.9	22164	17576.5	7187.8	17906.8	26227.1	16514.6	15141.2	7301.3	21389.6	10035.8	32728.3	27364	29495.2	39402.6	32276.9	26861.5	42448.6	48679.1	19101.5	24178.2	32707	28236.4	14442.3	17920.9	29335.1	31174.3	14693.7	15836.2	20920.2	28243.6	20269	18800.7	30203.6
Peak_03045	3.58004	339.11	19973.1	13756.8	15739.8	14190.5	25202.3	18961	18049.5	20004.5	9378.5	10603.1	12944.2	16642.5	16586.6	12006.7	17451.7	10523.5	11596.5	12308.4	11308.1	12131.4	20555.3	10337.3	17225.5	13821.9	12811.4	11832.3	12476.2	11667.6	10518.9	11133.8	14888.3	14311.1	20055.8	19277.3	14866.2	18137.2	21154.3	17806.2	20184.9	23001.5	9886.89	11037.9	16245.8	13927	13380.4	10716.5	18780.6
Peak_03046	2.74287	339.11	8796.78	8462.66	11043.5	8151.85	13835.4	8937.03	9033.68	9534.13	5454.09	4495.19	7218.84	4814.81	7263.57	5099.86	5398.5	3848.83	5379.7	9104.42	13190.4	7042.16	8659.52	5126.58	8482.68	5596	6664.22	5755.93	6956.47	6216.77	7974.76	6734.67	6563.52	6283.77	8811.09	10319.9	8503.19	10130.2	7673.09	8066.26	10337.9	10164.8	4171.07	4091.69	6167.31	4157.56	5043.94	3927.57	5667
Peak_03047	1.4215	339.149	2293.2	1673.39	1500.14	1449.68	2025.01	2102.79	1733.82	1919.36	1318.83	1103.32	1136.57	1162.2	1467.33	1167.15	1231.22	558.871	1691.88	1791.15	1877.9	1518.27	2597.78	1046.51	1929.32	1760.21	1141.45	1184.47	1092.62	887.48	1230.95	1144.67	1122.93	989.124	1915.81	1928.49	1612.1	1829.6	2296.87	1776.79	2082.89	2650.79	752.55	757.205	1261.78	785.898	1136.7	1201.39	1332.39
Peak_03048	3.63932	339.135	798.116	495.862	441.441	488.579	861.396	833.287	747.128	707.394	303.045	347.991	438.776	527.433	720.567	343.298	648.005	153.119	263.693	295.098	233.108	556.258	722.801	665.228	806.21	667.216	539.259	497.199	444.162	439.457	205.959	540.348	653.72	384.299	958.461	575.638	479.815	747.784	868.152	852.704	728.99	836.663	383.665	337.36	639.846	551.291	640.663	462.343	605.365
Peak_03049	3.80403	339.139	516.58	385.028	442.516	368.726	502.309	588.906	373.854	447.178	863.712	854.597	959.767	1412.3	916.857	908.551	1058.04	652.944	146.89	278.654	361.236	289.457	456.454	344.893	559.348	483.632	1326.85	1009.73	1039.72	704.007	896.012	1047.24	1258.42	1133.51	593.644	495.408	457.249	625.995	765.205	659.18	620.594	641.632	1132.82	1024.7	1369	1354.01	1101.27	955.854	731.93
Peak_03059	7.56962	339.329	1810.67	1147.32	234.062	576.132	602.596	961.862	898.359	974.816	200	200	200	200	598.515	247.519	389.985	200	200	456.93	452.974	200	1206.63	1193.35	956.068	783.678	417.205	956.303	338.268	200	200	347.05	584.945	200	2034.11	537.551	669.39	952.015	468.491	753.077	963.353	433.566	288.492	200	200	200	200	200	219.678
Peak_03060	8.79487	339.347	3029.23	3590.57	3230.47	6879.73	1114.99	1888.14	2676.98	2488.26	2897.5	1381.86	701.055	2118.68	847.339	802.827	2825.99	1386.66	2760.95	3698.97	2378.08	1141.79	2061.5	1417.65	5550.01	3023.26	4187.64	2384.39	1525.58	1766.05	3184.63	2695.29	6301.27	2238.78	2262.87	2778.56	1426.31	1697.76	1886.4	1492.77	1467.26	2843.04	1936.21	1780.08	1801.47	2744.29	2964.41	891.355	2599.37
Peak_03066	0.558667	339.97	1155.12	1120.1	1023.36	1042.63	1013.66	904.5	924.436	939.749	1307.96	970.651	1613.32	1771.87	1398.53	1327.67	1078.08	1371.45	895.093	937.975	934.747	964.785	1081.67	579.671	1092.65	711.068	1514.84	1520.94	1642.73	1637.49	1432.86	1489.11	1604.53	1891.08	1004.9	1050.14	1060.49	1278.07	1121.27	1152.29	1127.06	1467.94	1628.17	1503.25	1746.78	1783.61	1485.41	1851.75	1569.43
Peak_03070	2.56097	340.081	381.397	331.766	200	229.217	418.971	497.503	337.665	532.486	189.224	200	321.247	306.131	479.592	288.211	200	200	469.696	299.389	338.095	269.948	389.437	240.527	325.169	440.651	286.858	281.69	398.914	305.359	451.142	200	196.127	340.457	377.489	378.046	200	197.544	286.363	200	287.395	281.63	200	419.644	417.505	260.149	321.565	299.411	309.373
Peak_03071	0.713649	340.106	424.188	360.323	424.658	472.768	428.574	364.303	567.953	323.976	568.213	465.09	486.059	542.217	393.893	413.59	303.119	200	272.78	504.477	353.544	443.199	414.176	200	369.77	417.54	564.516	642.587	522.057	540.51	371.782	345.515	447.04	382.663	363.701	407.428	392.47	494.087	425.407	332.221	341.171	536.216	557.795	584.53	735.214	637.24	611.759	520.474	563.932
Peak_03072	1.4215	340.093	1664.31	1385.57	1422.63	1231.74	1666.88	1747.71	1407.09	1668.01	846.294	759.041	1126.74	909.153	1131.98	653.836	788.641	209.748	1431.69	1528.79	1643.41	848.81	2083.3	1140.75	1560.19	1398.75	715.062	573.64	824.987	583.962	818.906	833.913	782.884	636.979	1451.04	1511.56	1288.16	1549.74	2035.38	1611.77	1764.34	2026.23	508.333	546.478	934.672	559.823	914.798	824.744	942.442
Peak_03073	2.99224	340.112	3145.52	3579.75	4757.71	3927.57	3420.07	3062.6	4497.2	4422.52	2533.13	2438.54	3348.26	5471.06	4294.02	3310.85	3761.84	3023.75	1218.77	3267.96	5113.04	2659.85	2631.4	1133.56	4233.32	1784.5	5819.03	4715.18	6116.96	7447.13	5500.56	4846.32	7633.05	8852.71	3319.66	4272.33	6216.02	4733.77	2674.94	3266.92	5493.89	5569.41	2589.67	3315.87	4069.48	5354.04	3656.16	3291.2	5243.96
Peak_03074	2.74287	340.112	1763.9	1425.36	1940.18	1276.8	1923.86	1519.98	1997.08	1644.63	927.867	876.337	1189.39	739.143	1390.61	908	747.997	475.215	1360.8	1608.89	2107.54	1233.95	1666.53	1796.53	1464.43	1081.38	1258.81	896.524	1075.5	986.639	1445.03	1310.14	1301.45	1087.47	1601.31	1891.22	1751.16	1792.44	1371.28	1324.26	1909.41	1852.86	863.951	652.959	1125.55	717.474	820.781	746.652	895.196
Peak_03075	3.61079	340.113	3615.46	2787.21	2820.28	2728.2	4031.55	4168.3	3481.27	3491.91	1715.72	2076.99	2328.64	2913.57	3083.2	2086.67	2952.53	1528.88	1902.59	2034.37	2318.9	2290.97	3849.04	2055.27	3366.44	2656.64	2338.29	2015.78	2197.87	2081.47	1778.98	1879.95	2593.81	2759.99	3814.06	3698.87	2883.4	3429.97	3829.35	3346.49	3681.77	4040.14	1778.96	1938.26	2681.97	2584.59	2687.4	1984.8	2910.8
Peak_03076	3.00904	340.134	159.895	119.398	223.121	210.321	175.179	200	181.83	299.77	211.626	200	118.304	410.996	319.766	263.778	191.852	200	200	215.605	175.863	237.234	200	200	245.104	200	367.503	256.535	352.24	441.769	404.067	346.346	643.685	569.058	169.645	394.716	247.155	402.016	200	285.169	398.962	492.744	225.396	166.116	299.909	280.557	201.252	177.233	224.823
Peak_03077	1.45474	340.151	358.001	267.055	288.557	265.165	519.099	383.156	297.044	372.201	246.672	174.518	260.514	212.532	276.645	199.481	200	200	269.475	357.963	344.066	313.556	501.214	200	379.69	373.32	204.803	146.71	150.425	127.645	302.797	214.017	200	211.415	327.919	360.748	237.818	382.441	487.492	419.334	456.989	513.322	126.206	217.404	182.666	173.797	218.858	277.408	157.29
Peak_03094	0.592674	340.97	284.597	236.71	425.671	305.909	200	208.575	289	288.209	368.048	269.453	350.713	406.992	509.732	345.438	379.437	337.008	360.8	314.971	200	283.557	209.671	200	282.086	144.97	418.414	382.672	469.105	436.976	381.847	439.96	487.04	498.276	259.993	219.806	253.553	395.91	607.929	266.49	548.711	335.204	353.811	359.48	582.477	552.458	498.479	519.585	442.251
Peak_03095	0.864081	341.065	2230.32	2051.76	1828	1766.15	1673.25	1920.13	2559.87	1751.74	1714.48	1557.77	1806.71	1968.28	1278.92	1695.49	1816.33	1145.19	1962.99	1559.34	1986.45	1720.81	2217.97	935.656	2264.12	1540.59	1209.5	934.613	1062.89	1372.68	1372.4	1169.55	1572.12	1601.65	1955.15	1951.47	1436.31	2025.51	2164.08	1970.05	1704.78	1977.82	766.954	1087.58	1593.54	1250.31	1495.1	1633.71	1422.57
Peak_03097	0.713649	341.103	432.363	346.465	210.427	272.42	143.638	294.563	226.071	228.83	266.396	285.564	141.756	220.371	217.897	265.054	200	200	180.048	276.681	247.79	231.612	267.882	200	427.194	64.8032	215.292	218.185	211.652	200	298.353	274.791	128.882	151.571	313.668	265.462	224.081	257.745	367.684	168.085	285.489	217.883	291.074	241.885	295.804	239.74	274.089	235.952	251.108
Peak_03098	3.63932	341.109	850.728	814.134	773.3	789.879	1131.56	788.512	677.63	813.285	520.702	786.223	512.696	784.695	740.512	693.731	781.809	590.891	673.001	472.407	573.647	462.054	836.923	466.061	708.084	680.447	746.308	679.447	589.821	679.32	560.841	669.751	743.592	621.998	750.303	847.136	1239.01	748.462	937.603	956.718	787.716	942.717	689.55	579.085	849.299	613.337	590.033	614.243	625.959
Peak_03099	3.00904	341.114	426.021	530.257	678.138	741.019	538.148	354.2	687.436	540.021	260.224	333.35	637.535	912.27	596.644	550.541	668.863	533.701	317.574	543.079	775.783	634.375	435.703	346.25	657.864	5.90997	986.158	775.534	878.763	1283.33	1073.12	825.627	1373.81	1508.71	502.489	788.273	984.488	811.067	421.373	523.963	824.502	995.268	335.363	374.681	662.695	771.385	574.708	605.72	1056.83
Peak_03100	3.26168	341.14	1795.92	1814.32	2234.48	2391.03	2646.46	2093.19	2247.16	2193.25	2763.54	3127.19	3964.48	4474.74	3300.26	3434.59	3943.13	3217.58	1285.72	2885.22	2808.53	2055.12	2317.77	1226.13	2093.3	1743.73	4841.71	4870.41	4502.59	4928.87	4687.52	4023.52	5175.24	5617.18	2540.29	3662.69	3073.48	3041.8	2005.22	2331.36	2466.43	2842.04	4023.46	3536.63	4140.25	4809.45	3843.39	3302.48	3944.28
Peak_03102	3.78724	341.14	5233.6	4647.51	4515.23	5208.76	5835.47	4466.83	4727.99	5575.9	3038.87	3702.74	4264.77	7256.97	3738.81	3669.69	4561.35	3220.86	3083.02	3706.87	4682.47	4240.13	5249.51	2982.65	5384.76	4372.86	6097.23	5768.71	5033.06	6028.63	5053.74	5225.58	6918.52	8316.86	5290.68	6291.54	4910.92	6795.98	4505.2	5277.1	5986.59	6886.52	2630.77	2092.15	3034.19	4294.98	2632.48	2402.72	3229.74
Peak_03103	3.77045	341.139	5233.6	4647.51	4515.23	5208.76	5835.47	4466.83	4727.99	5575.9	3038.87	3702.74	4264.77	7256.97	3738.81	3669.69	4561.35	3220.86	3083.02	3706.87	4682.47	4240.13	5249.51	2982.65	5384.76	4372.86	6097.23	5768.71	5033.06	6028.63	5053.74	5225.58	6918.52	8316.86	5290.68	6291.54	4910.92	6795.98	4505.2	5277.1	5986.59	6886.52	2630.77	2092.15	3034.19	4294.98	2632.48	2399.64	3229.74
Peak_03113	6.74558	341.268	7730	7735.57	6669.41	6414.51	8153.5	6777.69	7135.97	7434.18	5907.65	7204.49	6522.36	7215.25	7683.51	7470.9	6502.35	5962.1	4504.76	5917.39	7548.41	4716.54	7818.2	4717.03	6676.61	5541.19	7677.42	2938.64	2082.57	5340.46	7445.3	7204.15	7607.24	6423.34	6252.98	7386.37	7358.29	7870.8	6707.5	6648.95	6167.89	8196.41	6555.42	5703.24	7694.01	7575.69	5882.33	7427.89	7578.27
Peak_03119	2.79196	342.069	200	200	200	200	200	200	200	200	397.47	557.974	548.841	651.202	345.318	345.921	637.042	553.01	200	200	200	200	200	200	200	200	449.728	650.067	734.116	579.905	311.572	325.23	580.778	281.606	200	346.052	333.036	299.209	200	200	200	261.295	572.303	817.519	758.777	852.958	325.992	447.763	603.393
Peak_03122	3.31204	342.143	384.347	386.388	421.14	530.212	575.653	375.284	449.805	399.205	728.402	769.805	817.213	1111	734.427	956.465	918.903	739.345	317.782	571.484	569.914	395.048	432.947	523.72	454.878	324.896	1197.48	1148.74	986.144	1319.36	1052.79	911.948	1009.04	1244.41	449.136	757.458	689.54	577.816	439.705	581.119	564.143	737.463	786.911	757.111	978.513	1014.85	861.363	914.265	879.622
Peak_03123	3.78724	342.143	1124.11	993.434	990.989	1195.15	1260.58	1117.97	1049.68	1242.54	702.567	884.027	897.301	1492.94	922.594	837.492	1011.73	667.193	1197.86	661.922	844.884	973.748	1230	1268.99	1293.45	1091.15	1300.65	1162.26	1021.92	1325.36	1177.46	1242.42	1681.29	1885.08	1269.91	1531.9	1288.49	1395.26	855.676	1104.88	1254.28	1482.85	507.995	407.007	680.2	892.429	520.147	547.908	631.728
Peak_03130	6.74558	342.271	1659.7	1675.95	1255.42	1395.61	1582.04	1268.91	1344.38	1429.07	1066.7	1286.24	1133.06	1424.74	1534.71	1424.88	1199.69	1108.73	1586.08	868.527	1501.85	792.771	1440.61	1255.52	1197.73	1128.7	1456.51	418.711	200	934.21	1502.24	1590.3	1629.67	1320.8	1216.1	1277.32	1431.33	1438.57	1243.03	1310.25	1226.38	1470.13	1446.06	1146.4	1427.97	1414.73	1075.81	1296.81	1215.67
Peak_03134	1.34525	343.081	574.021	450.124	432.6	456.493	640.274	465.721	413.611	438.207	268.726	269.27	390.45	255.355	320.502	279.999	148.804	53.8404	281.236	567.054	471.739	400.579	639.1	180.381	402.832	389.647	218.389	153.6	80.7323	315.715	326.259	263.552	187.957	394.534	415.692	432.954	788.606	676.624	555.337	562.969	534.507	633.141	100.21	236.739	281.904	180.96	174.08	229.354	317.482
Peak_03136	1.38857	343.102	6643.36	6513.66	5371.58	5425.14	6898.19	7374.22	5997.22	6297.5	4638.82	4410.8	4994.73	4408.76	6044.92	4101.62	4271.81	2287.08	5152.16	6485.11	6687.31	4587.09	7680.81	3314.39	6807.26	6485.18	4203.11	3795.53	3778.82	3649.95	4554.32	4537.67	4464.11	3943.75	6678.18	6319.16	5772.02	5972.14	7349.14	6128.88	6773.29	7876.33	3612.49	3591.22	5042.48	3935.89	4710.04	4498.54	4489.92
Peak_03137	3.955	343.103	9513.07	12504.8	6672.02	11909.3	9648.4	2373.38	8842.15	5715.27	7117.15	12776.6	5395.21	3434.35	4494.35	5074.69	5233.1	6776.88	4914.01	5125.68	4799.86	5243.73	10350.5	4972.66	5474.23	7448.28	1866.2	2173.46	1968.27	2330.37	2672.31	1877.73	1373.4	1288.09	2331.08	4958.01	2354.29	4905.82	14221.9	11465.4	4037.17	8022.45	4809.19	2844.21	6723.16	2436.45	2601.96	1767.05	2042.97
Peak_03138	0.646968	343.125	3177.69	2719.17	2766.97	2687.96	2220.69	2979.85	2871.57	2570.39	2912.45	2624.03	3433.59	3810.52	2854.76	3007.82	3085.67	1390.43	2539.39	2729.74	2889.6	1913.47	2738.41	1071.41	2691.89	2236.31	3488.45	3768.08	3980.84	3414.69	3264.25	3415.78	3390.51	4084.13	3234.95	3229.52	3349.9	3624.61	3177.11	2908.19	3292.33	3187.33	3907.77	3228.06	4321.47	3988.25	4101.41	3384.06	3217.63
Peak_03141	4.12281	343.124	907.093	1276.71	412.614	1036.85	598.721	200	604.351	435.369	606.373	1094.45	316.381	170.519	306.629	332.251	397.51	464.33	425.688	284.838	113.516	275.408	811.157	576.48	404.095	499.585	200	200	200	200	200	198.542	200	200	144.378	259.487	200	303.734	1276.47	1161.92	235.919	597.889	418.985	162.857	528.061	90.2157	125.406	200	200
Peak_03142	2.94198	343.137	167.983	200	139.568	251.687	200	227.646	244.836	487.307	303.004	401.734	200	187.092	674.93	503.343	256.442	285.74	200	200	200	200	228.299	297.152	200	200	343.801	200	200	234.724	777.231	200	243.711	300.697	200	333.693	293.635	361.265	200	295.067	284.03	483.282	200	200	147.73	326.786	517.128	396.444	334.416
Peak_03150	4.92848	343.296	857.043	721.095	515.518	722.047	899.842	804.202	818.687	637.802	657.097	676.798	694.723	873.557	1031.23	688.052	467.832	451.699	799.435	517.109	525.463	765.241	620.355	515.697	562.559	460.955	798.147	1032.37	927.121	509.76	681.024	699.828	772.843	564.949	1793.01	595.159	880.759	544.319	681.475	522.551	662.798	666.651	833.318	481.66	885.27	617.936	676.202	590.452	769.802
Peak_03152	0.797242	344.092	441.013	471.86	588.177	505.506	477.24	488.764	570.866	388.76	303.057	272.006	511.543	512.371	253.431	297.454	369.637	139.867	444.366	508.665	684.436	312.8	472.085	277.291	489.763	379.681	373.636	383.258	448.838	412.128	408.163	342.892	410.507	465.775	491.522	484.778	415.764	663.924	379.295	501.821	400.545	473.823	350.464	401.944	504.308	480.543	414.858	314.121	327.222
Peak_03153	1.4215	344.104	916.245	766.504	704.162	666.906	1255.53	1096.19	759.129	803.945	689.798	519.005	757.938	677.148	796.812	596.565	470.931	259.552	857.68	900.714	1001.27	803.481	1214.47	432.363	793.916	963.666	449.344	562.375	468.151	541.823	620.17	588.394	605.666	509.406	989.509	952.218	696.932	849.999	1091.85	954.802	882.619	1199.89	600.553	488.295	687.347	451.375	637.997	631.694	743.17
Peak_03154	4.03888	344.107	1733.82	2242.16	1071.38	1967.57	1638.37	405.792	1619.2	1093.88	1305.84	2376.28	886.668	531.25	783.504	872.708	848.751	1026.01	775.766	743.851	722.404	815.195	1952.26	1525.17	1010.96	1447.23	298.897	224.205	200	365.443	302.302	205.954	200	200	430.527	796.283	335.606	767.044	2289.79	1891.72	633.075	1313.06	783.965	411.681	1167.01	372.249	334.888	244.835	380.394
Peak_03155	0.746939	344.129	448.529	429.525	479.767	483.86	590.554	502.233	381.442	407.323	467.67	353.312	535.261	663.342	478.932	492.207	504.438	169.809	272.444	647.113	366.357	494.254	410.39	200	436.042	313.222	525.51	659.557	768.144	590.848	460.65	625.308	565.043	595.436	436.947	368.249	563.132	561.919	539.327	450.128	536.833	593.153	563.782	539.712	613.917	585.458	633.418	782.312	502.029
Peak_03156	2.80808	344.136	1818.35	1849.7	1640.97	1740.49	2169.53	1858.19	1833.2	1723.6	3055.44	2727.56	3454.53	3178.21	3328.05	2893.63	3228.35	2033.36	831.093	1500.44	1533.66	950.544	1526.83	1511.25	1725.56	885.149	3569.55	2104.23	2232.31	3105.53	2991.77	2921.38	3364.12	2821.88	1809.5	1865.2	1985.75	1609.08	1849.33	1606.81	1661.4	2071.41	2935.1	2752.01	4301.66	3363.56	3491.58	2683.6	3377.89
Peak_03158	-0.0331044	344.229	1926.24	2161.65	1772.29	1513.07	1112.19	2062.2	2027.06	1199.45	1984.56	1758.84	1996.68	1935.94	2081.74	2031.75	1909.64	1624.85	1488.93	1995.65	1564.11	1910.99	2015.53	1504.76	1888.84	1387.55	1466.08	1945.06	1446.82	1881.98	2275.61	1771.41	1674.7	2042.4	1780.05	1867.79	1875.81	2022.77	2273.89	2048.1	1488.48	2106.71	1810.1	1687.65	1978	1815.69	1741.54	1847.46	1595.34
Peak_03159	2.79196	344.23	522.413	427.584	311.668	386.084	771.822	430.254	503.997	510.614	536.088	529.065	472.281	437.838	623.478	397.814	442.883	626.337	703.778	2698.43	1389.79	363.077	443.16	282.607	1108.14	7224.86	680.246	34284.2	53343.2	649.547	597.841	624.548	556.165	504.996	415.983	415.696	508.369	372.451	508.217	452.314	530.836	448.301	474.116	350.452	592.917	536.542	446.866	520.031	665.662
Peak_03166	4.57608	345.09	1056.19	942.858	711.385	827.197	1128.53	779.153	1068.6	798.378	964.094	1108.04	930.121	1280.15	978.574	972.229	1226.47	671.269	722.434	442.442	691.363	913.078	1065.34	884.65	1006.42	647.683	1192.37	1263.8	1287.98	808.553	1006.81	1046.76	1313.74	1097.3	819.309	976.322	880.252	799.959	690.693	988.416	851.058	1053.15	1072.51	897.355	1264.88	1141.74	1024.22	1028.64	947.889
Peak_03171	3.0426	345.134	4982.18	4569.81	4724.1	4538.21	6044.53	4563.08	4696.25	4867.7	13944.2	12803.9	14699.5	15831.9	15084.9	14087.8	14747.8	11365.3	2272.22	4754.38	4744.53	3583.24	5470.31	2857.26	4725.39	3214.45	16964.5	14041.4	15175.8	12405.3	15856.5	13349.9	13887.1	13384.7	4662.38	5328.36	5482.79	5102.84	5257.27	5005.38	5475.91	5898.38	14059.4	15031.5	19226.8	15893.2	16658.8	14349.9	15989.8
Peak_03174	3.09097	345.151	989.079	1023.8	750.593	943.173	757.147	883.884	944.229	956.437	2637.58	2573.77	2439	3289.71	3121.43	2746.6	2817.71	1677.25	319.019	698.954	913.251	420.781	1080.04	377.771	1029.63	613.063	4034.03	2865.73	3127.87	2328.59	2121.39	3468.57	3414.63	2819.25	1108.48	1047.18	980.041	1097.2	980.781	1161.98	1414.4	1056.48	3438.45	3554.9	3291.28	3593.42	3281.88	2504.51	2331.93
Peak_03185	4.57608	345.591	527.503	449.419	348.632	409.925	467.767	674.666	421.645	457.473	310.61	517.142	413.366	575.819	480.779	450.145	487.867	471.502	440.427	148.164	578.827	200	620.917	356.782	294.267	451.323	525.698	608.368	392.476	518.042	363.066	341.478	561.093	406.267	383.631	489.666	396.275	281.796	579.675	412.259	331.474	572.765	473.462	405.139	593.837	503.519	388.514	422.229	625.748
Peak_03187	4.59288	346.091	292.041	245.435	205.212	200	211.862	213.245	223.038	151.894	262.312	343.124	200	310.049	338.166	363.292	202.964	200	200	200	313.933	200	96.395	236.691	279.003	267.657	343.272	395.019	258.847	191.667	289.282	195.684	267.494	272.496	207.976	223.338	102.907	164.287	200	186.299	137.9	395.604	292.402	190.97	315.765	277.64	154.756	280.428	236.048
Peak_03189	2.90844	346.151	3400.99	2431.42	2626.03	2228.87	3502.8	4097.55	3028.04	3213.62	1125.19	970.321	1469.3	1223.92	1929.6	1200.25	1510.7	1087.16	1616.01	1775.87	1989.13	1479.34	2930.15	2226.39	2938.19	2295.65	1366.31	879.314	200	1175.72	1469.73	1767.89	1250.38	1387.99	2485.73	1718.08	1812.61	2346.97	2738.95	2568.9	2618.68	2824.91	741.153	718.308	1596.75	807.48	1429.33	1073.37	1231.25
Peak_03190	3.05839	346.139	1681.97	1247.62	1106.74	983.046	2007.62	1968.97	1547.59	1602.12	2487.08	2788.89	3074.87	3344.87	3595.15	2983.41	2944.78	2235.73	640.071	955.129	934.255	755.964	1534.23	981.305	1365.61	1019.52	3384.9	2597.92	3197.49	3024.69	3131.33	2723.88	2719	2546.93	1288.26	1060.06	1226.31	1155.35	1275.87	1198.42	1133.13	1395	2779.19	3089.18	4066.49	2932.88	3360.01	3297.18	3468.85
Peak_03191	2.69318	346.151	949.737	1295.3	1056.78	1402.32	1423.91	1297.35	1134.91	1059.1	1013.53	1030.88	1134	1290.57	1126.84	1148.38	1017.56	200	914.934	1357.3	1758.13	936.926	913.116	867.855	1239.95	1054.76	1334.35	1541.97	1328.69	1865.39	1185.99	1036.56	1253.53	1427.32	1257.26	1801.57	1832.8	1606.25	1037.54	1207.36	1233.93	1462.35	1080.23	1383.42	1375.17	1546.02	911.224	998.353	1393.48
Peak_03195	0.847468	347.075	18.207	200	17.1065	121.342	135.248	252.481	8.96579	34.6965	164.059	200	157.69	249.607	200	202.732	189.177	200	200	11.2324	200	200	200	200	200	200	143.392	107.618	341.905	100.331	200	42.3171	52.4152	164.433	4.41124	181.579	109.303	174.509	187.746	200	142.928	168.238	143.864	193.741	278.857	153.135	239.856	154.897	139.017
Peak_03197	0.713649	347.1	272.217	261.735	281.151	352.007	200	286.347	419.885	308.283	264.46	235.808	300.999	325.887	251.535	256.874	174.414	200	232.847	389.773	367.701	269.993	380.74	155.166	471.052	412.763	374.038	271.994	403.399	238.974	471.273	261.274	267.384	254.414	327.041	240.313	311.38	344.499	390.355	302.008	384.876	486.342	361.072	303.343	454.358	241.807	426.012	424.471	328.181
Peak_03199	2.74287	347.131	422.741	360.883	429.921	358.715	474.281	474.054	309.233	342.262	491.504	488.187	546.451	345.09	583.444	509.134	422.355	200	339.44	200	295.009	241.306	349.484	489.06	267.921	200	630.978	104.526	50.2463	531.342	630	491.763	459.481	471.693	457.317	383.977	440.645	303.26	478.935	372.265	309.828	198.843	491.568	469.496	549.733	473.018	511.255	430.941	351.176
Peak_03215	7.35143	347.319	1923.82	2233.2	1476.93	1954.61	1720.06	1621.78	1979.64	1598.27	1567.77	1689.7	1732.09	1126.38	1881.7	1895.86	1913.27	1775.9	1001.19	933.671	1021.79	1038.48	2252.7	1139.02	1919.32	874.402	2074.16	200	200	815.696	1148.25	1930.82	1907.17	1550.99	1538.9	1203.42	1860.66	1651.21	1267.48	1768.74	1747.18	2105.5	1960.03	1171.81	1901.59	2087.46	1761.9	2000.14	1612
Peak_03220	0.713649	348.072	221.108	439.968	359.589	204.359	260.957	230.997	278.682	261.414	255.338	292.098	631.399	547.828	345.827	228.062	466.977	238.83	200	475.65	623.333	140.263	283.897	200	418.81	157.759	1079.53	768.288	1266.7	1122.37	975.381	840.17	1235.63	1146.4	199.886	540.437	201.296	198.069	457.036	317.437	362.739	699.263	291.051	312.023	628.141	1041.95	539.228	748.334	453.047
Peak_03222	0.730278	348.101	276.822	194.015	182.386	201.696	157.17	239.309	245.588	236.627	174.472	200	162.498	173.192	187.044	147.873	102.478	200	252.867	288.5	238.249	200	178.508	200	321.312	180.317	273.935	239.897	289.474	168.124	232.262	95.2267	110.17	113.083	200	204.637	258.049	305.97	300.259	147.162	194.2	169.447	373.858	235.716	403.638	246.935	235.694	200	244.918
Peak_03223	1.04741	348.13	684.386	680.988	675.3	575.062	782.422	653.404	605.615	597.852	813.308	782.236	821.909	759.096	812.451	723.92	718.366	381.23	676.996	496.655	733.867	451.858	890.748	352.049	615.54	519.327	698.754	519.376	724.019	685.047	652.9	693.158	767.254	723.235	840.243	879.885	820.143	773.716	1075.24	807.431	737.672	1067.43	738.872	731.43	852.297	737.579	604.503	675.543	787.675
Peak_03225	7.4354	348.32	399.84	446.028	200	349.584	447.795	167.756	292.144	175.896	279.858	285.762	272.539	253.715	291.161	297.596	316.276	338.034	402.954	211.355	194.854	200	392.845	256.447	245.076	200	356.474	200	200	200	200	434.741	421.501	330.978	369.469	200	341.881	328.933	252.144	324.471	299.912	351.981	407.282	205.455	267.109	401.311	338.932	310.097	353.069
Peak_03231	5.1319	348.991	195.506	298.221	132.269	234.301	439.294	240.507	227.669	200	174.613	211.955	196.505	279.941	245.484	311.372	396.79	206.718	384.91	200	182.598	200	200	229.693	224.889	324.156	251.682	156.667	245.546	267.925	274.559	280.463	170.454	314.769	258.846	318.386	207.394	200	200	244.994	189.493	292.718	219.874	233.389	267.795	200.605	229.983	271.675	249.212
Peak_03232	0.813994	349.026	956.272	803.419	607.535	720.198	787.928	1010.2	1009.81	632.021	522.915	447.01	380.6	625.637	646.628	917.513	758.912	259.638	767.516	810.725	628.62	673.974	1067.21	802.126	1231.87	1228.6	373.836	617.397	516.372	389.51	525.296	681.903	574.303	502.24	559.693	483.084	305.199	750.487	833.911	776.641	665.951	814.526	737.96	745.988	1084.26	677.267	1847.65	1596.89	819.594
Peak_03233	0.763696	349.062	1633.17	1555.77	1303.02	1325.57	1155.93	1434.25	1739.86	1227.34	1195.66	1418.6	1107.17	1457.94	1413.83	1504.46	1131.16	597.602	1161.2	1249.19	1385.66	606.229	1509.49	831.933	1643.92	1207.2	1072.77	1334.96	1028.52	1093.56	999.388	1225	1111.75	1340.98	884.901	1037.06	872.83	1066.7	1617.25	1544.22	1267.56	1307.3	1594.93	1359.79	1918.13	1547.02	2284.54	2203.69	1276.81
Peak_03235	2.82471	349.091	494.666	1241.24	1112.27	988.027	805.954	667.036	1192.53	754.91	1033.67	979.12	1187.04	1365.24	1159.27	1007.9	1073.52	815.831	376.894	984.995	1472.32	560.097	508.377	650.471	1043.77	406.628	1274.5	1382.15	1405.59	2197.62	1260.47	1166.66	1867.39	1573.86	529.598	1034.23	1472.79	1018.7	700.669	744.271	672.513	815.393	941.448	1306.55	1323.15	1403.77	1053.19	1008.08	1248.9
Peak_03236	3.05839	349.078	2395.39	410.2	1842.23	3075.89	1859.34	1211.07	1391.85	2555.65	200	64.5271	251.887	386.996	283.062	144.388	198.602	337.802	1007.11	1439.7	1612.88	1891.08	1572.75	1021.12	1124.68	966.097	360.876	403.892	459.472	595.259	712.853	259.854	409.681	711.235	727.151	815.937	445.919	2249.21	458.539	485.398	1804.14	1685.06	66.578	170.674	84.805	237.62	24.8563	50.8462	200
Peak_03240	0.746939	349.087	279.506	287.73	277.849	187.952	126.437	246.571	276.48	197.716	170.236	170.143	211.548	252.045	203.069	141.538	238.765	62.2489	2.84886	176.261	278.151	181.827	255.438	200	261.939	200	236.403	327.556	217.098	214.591	258.407	288.09	273.673	222.089	256.679	169.805	176.619	195.142	381.778	206.319	241.016	232.147	195.62	206.81	226.474	224.056	169	264.754	200
Peak_03241	3.67214	349.127	2643.52	3420.74	2742.72	3098.63	3119.78	2904.49	2889.15	3508.13	929.797	1128.19	1229.32	1473.34	925.889	1053.23	891.332	786.224	1927.26	2598.04	2959.55	2544.42	2261.67	1335.39	2908.33	2390.8	1244.7	808.945	694.067	1582.01	1314.38	1467.52	1222.84	1625.74	3250.35	4471.96	3304.56	4665.56	2323.06	2891.24	3038.81	3039.16	943.133	806.737	886.387	1247.29	730.544	545.833	735.427
Peak_03252	8.09436	349.253	680.586	739.449	699.671	676.51	820.259	200	586.488	517.724	812.992	597.853	651.989	1072.5	200	418.317	785.406	629.358	602.603	234.856	982.892	408.083	739.161	556.395	512.047	412.953	564.349	200	200	417.811	776.68	260.962	307.426	513.936	268.011	513.293	558.424	612.816	351.129	580.099	344.967	598.927	514.033	1108.21	813.486	803.368	787.528	663.112	635.582
Peak_03255	-0.0909927	349.347	762.259	1047.97	627.032	547.456	601.342	901.405	915.475	623.504	1049.6	894.709	812.948	862.695	983.99	759.584	911.683	768.376	751.479	773.437	642.154	627.962	944.578	690.587	1020.27	200	542.035	773.813	819.845	990.667	792.71	1162.87	849.281	959.969	629.853	894.549	1021.91	602.815	808.385	909.115	723.395	784.423	795.414	714.973	1095.64	739.139	761.768	831.155	846.221
Peak_03260	0.780457	350.065	324.298	354.348	150.602	245.427	406.429	345.338	356.774	332.84	275.694	250.757	252.55	326.787	268.31	391.911	243.264	200	243.947	339.158	348.777	155.399	339.818	200	380.108	384.164	295.266	335.198	252.565	321.611	358.358	389.09	265.047	249.168	233.785	143.694	113.655	202.391	408.703	344.29	287.754	273.068	329.492	356.276	422.132	324.125	509.383	459.282	242.366
Peak_03281	0.646968	350.886	1123.86	1050.76	1092.94	999.296	633.177	998.646	1158.88	1184.58	1044.79	1019.63	970.204	1064.23	1347.87	1091.07	918.743	829.126	996.032	1052.29	971.993	929.768	1214.94	200	1015.24	1040.31	786.847	690.353	852.99	791.962	1066.13	1168.6	1069.72	1062.42	653.951	717.507	806.185	1042.48	1022.47	1323.27	954.887	1267.17	798.578	559.567	956.291	728.668	921.95	980.065	760.365
Peak_03282	5.1319	350.988	200	260.214	200	289.779	323.473	194.105	277.364	301.254	297.181	285.963	318.096	281.383	325.615	296.982	326.653	233.22	227.749	166.907	117.945	251.447	200	205.928	240.511	200	293.145	267.654	135.028	208.305	261.172	239.645	276.263	341.046	283.122	195.784	231.697	149.815	200	217.183	139.7	253.4	233.827	166.237	327.247	280.378	301.375	305.197	271.611
Peak_03284	0.66493	351.071	2395.46	2491.17	2727.74	2593.3	1922.17	2376.55	2880.63	2664.5	2145.83	1844.62	1894.69	2136.31	2080.72	1802.62	1629.55	995.799	2103.46	2307.11	2611.54	1822.01	2471.52	934.178	2578.43	1867.22	2024.93	1662.29	1565.53	2174.4	1925.43	1738.76	1596.03	1822.61	2354.21	2502.2	2481.87	3324.07	2636.26	2581.3	2922.91	3014.92	1686.35	1568.32	1952.65	1874.01	1985.73	1881.01	1597.97
Peak_03285	4.23995	351.086	505.63	512.271	605.674	508.778	648.307	472.408	464.918	546.626	174.81	200	375.217	399.31	417.557	128.04	259.318	256.575	517.076	324.166	530.819	428.218	634.086	212.741	537.732	565.488	298.328	388.004	408.804	346.322	412.843	336.227	345.884	411.845	524.268	545.733	616.117	579.94	542.045	506.956	533.223	604.458	250.919	261.982	337.309	372.966	311.521	170.9	181.228
Peak_03286	2.90844	351.106	4126.09	3244.39	3133.9	2877.89	4377.17	5068.72	4347.73	4208.67	2592.17	2320.37	2111.24	2030.87	3019.63	2296.48	2355.28	1591.98	2071.73	2422.53	3181.23	2057.04	4439.18	2417.29	3970.85	2711.64	2663.4	1174.98	1202.34	2109.85	2312.48	2671.38	2127.35	2205.01	3114.03	2344.33	2478.15	3220.96	3521.56	3299.73	3524.85	3714.01	1493.41	1679.29	3047.41	1761.48	2806.63	2036.3	2215.06
Peak_03289	3.32882	351.113	2313.66	2817.11	2172.57	2544.28	2500.47	1465.19	2909.32	2742.24	547.974	572.617	527.249	937.661	577.707	464.983	847.012	573.03	1477.46	2654.19	1782.27	2050.36	2184.67	2049.41	2787.08	2353.67	674.616	619.144	533.31	836.002	771.267	569.931	702.067	735.495	2525.98	2598.3	2155.32	2960.65	2550.94	2675.05	2728.67	2645.64	518.443	563.456	661.438	880.608	483.935	506.124	806.424
Peak_03290	3.83759	351.109	4867.33	5022.16	5385.38	5639.33	5761.72	3504.95	3889.68	5544.86	608.275	1000.73	1309.54	2177.1	862.14	869.565	980.221	878.947	3895.17	4343.02	5527.25	5530.23	5849.45	2704.49	5071.33	5037.34	1181.75	1175.69	1550.83	1803.86	1249.35	1231.02	1569.83	2131.04	7235.87	7506.26	6999.18	8309.2	6776.2	5226.62	6386.88	7791.52	583.987	570.662	952.538	1490.64	515.237	689.346	1875.85
Peak_03291	4.25673	351.11	439.607	342.808	409.197	371.696	377.899	345.6	413.517	430.306	253.155	369.39	376.977	355.966	486.924	342.221	465.49	252.561	119.675	189.563	289.911	196.169	625.831	250.333	354.87	381.884	525.385	412.908	267.981	505.391	570.006	339.436	339.405	404.343	431.168	371.271	353.706	458.046	690.868	378.264	405.786	405.357	308.475	449.502	579.668	306.41	419.221	416.541	179.92
Peak_03306	0.697057	352.081	370.465	324.726	309.375	361.779	429.46	349.029	394.19	307.066	313.11	232.263	297.678	290.542	299.14	292.61	207.789	200	339.103	300.598	360.456	434.136	362.416	130.29	296.766	201.137	356.029	362.487	308.07	435.516	307.92	243.054	223.652	326.762	372.377	357.856	387.032	421.74	493.239	377.739	486.454	353.795	302.088	328.683	427.646	440.236	365.217	413.054	336.637
Peak_03308	2.92523	352.109	616.987	538.35	481.565	394.875	712.656	862.121	608.913	732.161	364.721	224.426	335.449	388.53	359.768	288.954	264.598	303.966	683.873	456.876	420.244	397.56	521.167	628.547	522.052	419.157	313.638	200	200	200	361.606	398.062	245.841	226.002	453.009	371.144	294.344	432.115	546.391	465.217	511.768	483.775	232.445	227.877	377.076	165.072	501.055	320.017	308.906
Peak_03312	6.94729	352.341	8916.76	10098.8	9543.55	9786.56	10045.7	8220.4	9267.29	4825.61	7695.96	10342.9	9112.03	14843.6	7023.03	10911.9	10970.6	9169.31	5094.8	6646.89	9114.83	5742.14	10221.7	8509.25	8981.42	7482.26	11164.3	7385.2	3591.41	6641.66	10274.5	10696.2	11243	10447.1	7453.82	8087.22	10288.9	11659.7	6557.12	10232.6	9297.05	10047.3	9485.53	11983.9	9691.6	10911.1	8411.14	10135.6	9630.27
[truncated: 4,437 more rows]
[truncated: 49 more columns]

## Sheet: leaves negative
Supplementary Table S5: All the metabolites detected by LC-MS in negative and positive modes
[truncated: 3,169 more rows]
[truncated: 49 more columns]

[truncated: 2 more sheets: root positive, root negative]
