# Supplementary material for: Mycorrhiza-Tree-Herbivore Interactions: Alterations in Poplar Metabolome and Volatilome
Source: Metabolites. 2022 Jan 19;12(2):93. doi: 10.3390/metabo12020093 (PMC8880370; doi:10.3390/metabo12020093)
Supplement: Supplementary file 1 [file metabolites-12-00093-s001.zip › Supplementary Table S6.xlsx]

## Sheet: Sheet1
Supplementary Table S6: Putatively annotated molecular formulas of the discrimant peaks across various treatments
Peak #	Name	Formula	m/z ratio	Annotation error
Peak_05505	(5Z)-(3S)-1alpha,25-Dihydroxy-3-deoxy-3-thiavitamin D3 3-oxide	C26H42O3S	435.29	0.0032006
Peak_01840	(E,E)-Trichostachine	C16H17NO3	272.114	0.0143927
Peak_03531	(S)-Rosmarinic acid	C18H16O8	361.1	0.0074694
Peak_03531	(S)-Rosmarinic acid	C18H16O8	361.1	0.0074694
Peak_00158	1,2,3-Propanetricarboxylic acid	C6H8O6	175.025	0.0009
Peak_00688	1,2,3-Propanetricarboxylic acid	C6H8O6	177.041	0.0005522
Peak_00688	1,2,3-Propanetricarboxylic acid	C6H8O6	177.041	0.0005522
Peak_01942	10,12,15-Octadecatrienoic acid	C18H30O2	279.233	0.0002823
Peak_02049	10-Methyl-heptadecanoic acid	C18H36O2	285.28	0.0003022
Peak_33538	11E-Tetradecenoyl-CoA	C35H60N7O17P3S	976.296	0.010147
Peak_33538	11E-Tetradecenoyl-CoA	C35H60N7O17P3S	976.296	0.010147
Peak_33538	11E-Tetradecenoyl-CoA	C35H60N7O17P3S	976.296	0.010147
Peak_07101	11-O-Demethylpradinone II	C24H16O11	481.081	0.0040554
Peak_07101	11-O-Demethylpradinone II	C24H16O11	481.081	0.0040554
Peak_15256	11-trans-LTC4	C30H47N3O9S	626.211	0.100637
Peak_15256	11-trans-LTC4	C30H47N3O9S	626.211	0.100637
Peak_22639	11Z-Eicosenoyl-CoA	C41H72N7O17P3S	1058.31	0.0738
Peak_00542	12,13-EpOME(9)	C18H32O3	295.228	0.000854
Peak_00542	12,13-EpOME(9)	C18H32O3	295.228	0.000854
Peak_01292	1-O-Sinapoyl-beta-D-glucose	C17H22O10	385.064	0.0493
Peak_01332	2,3-bis(4-Hydroxyphenyl)propionitrile	C15H13NO2	240.087	0.0152106
Peak_21096	2,3-bis-O-(Geranylgeranyl)glycerol 1-phosphate	C43H73O6P	717.53	0.0071549
Peak_02216	2,3-Epoxyphylloquinone	C31H46O3	465.335	0.001696
Peak_00310	2,4-Dimethylaniline	C8H11N	122.097	1.34e-05
Peak_00310	2,4-Dimethylaniline	C8H11N	122.097	1.34e-05
Peak_00310	2,4-Dimethylaniline	C8H11N	122.097	1.34e-05
Peak_01191	2,5-Dichloro-4-oxohex-2-enedioate	C6H4Cl2O5	226.953	0.0014182
Peak_01191	2,5-Dichloro-4-oxohex-2-enedioate	C6H4Cl2O5	226.953	0.0014182
Peak_00417	2-Amino-4-chloro-6-methylpyrimidine	C5H6ClN3	143.998	0.0354672
Peak_00363	2-Amino-4-methylpentanoic acid	C6H13NO2	132.103	3.6e-06
Peak_00363	2-Amino-4-methylpentanoic acid	C6H13NO2	132.103	3.6e-06
Peak_00363	2-Amino-4-methylpentanoic acid	C6H13NO2	132.103	3.6e-06
Peak_14593	2E,4E-Octadienoyl-CoA	C29H46N7O17P3S	888.251	0.0706
Peak_31802	2E-Decenoyl-CoA	C31H52N7O17P3S	920.311	0.0681406
Peak_31802	2E-Decenoyl-CoA	C31H52N7O17P3S	920.311	0.0681406
Peak_31802	2E-Decenoyl-CoA	C31H52N7O17P3S	920.311	0.0681406
Peak_13014	2E-Hexenoyl-CoA	C27H44N7O17P3S	862.281	0.1163
Peak_02352	2-Methoxyestrone 3-glucuronide	C25H32O9	475.154	0.0426
Peak_02352	2-Methoxyestrone 3-glucuronide	C25H32O9	475.154	0.0426
Peak_02353	2-Methoxyestrone 3-glucuronide	C25H32O9	475.154	0.0426
Peak_02353	2-Methoxyestrone 3-glucuronide	C25H32O9	475.154	0.0426
Peak_00776	2-Phosphoglyceric acid	C3H7O7P	186.982	0.0188948
Peak_00479	3,4-Dihydro-2H-1-benzopyran-2-one	C9H8O2	149.061	0.0002432
Peak_00479	3,4-Dihydro-2H-1-benzopyran-2-one	C9H8O2	149.061	0.0002432
Peak_12335	3-Hydroxybutanoyl-CoA	C25H42N7O18P3S	852.206	0.062
Peak_01426	3-Hydroxycinnamate sulfate	C9H8O6S	245.007	0.0049641
Peak_17398	3-Hydroxydecanoyl-CoA	C31H54N7O18P3S	936.338	0.1001
Peak_17398	3-Hydroxydecanoyl-CoA	C31H54N7O18P3S	936.338	0.1001
Peak_22797	3-Hydroxypristanoyl-CoA	C40H72N7O18P3S	1062.28	0.0957
Peak_00825	3-O-Methylanhydrotuberosin	C21H18O4	333.109	0.00351
Peak_00728	3-tert-Butyl-5-methylcatechol	C11H16O2	181.123	4e-07
Peak_00597	4-Acetamidobenzaldehyde	C9H9NO2	164.07	0.0014464
Peak_00597	4-Acetamidobenzaldehyde	C9H9NO2	164.07	0.0014464
Peak_00450	4-Acetamidobutanoic acid	C6H11NO3	146.083	0.0013967
Peak_01126	4-Amino-2-methyl-5-phosphomethylpyrimidine	C6H10N3O4P	220.048	0.0005392
Peak_01126	4-Amino-2-methyl-5-phosphomethylpyrimidine	C6H10N3O4P	220.048	0.0005392
Peak_01076	4-Bromophenylacetic acid	C8H7BrO2	214.918	0.0529269
Peak_00753	4-Dodecylbenzenesulfonic acid	C18H30O3S	325.184	0.000433
Peak_01270	4-Fluoro-3-phenoxybenzoic acid	C13H9FO3	233.066	0.0043002
Peak_01270	4-Fluoro-3-phenoxybenzoic acid	C13H9FO3	233.066	0.0043002
Peak_00995	4-Heptyloxyphenol	C13H20O2	209.155	0.0001936
Peak_00394	4-Hydroxybenzoic acid	C7H6O3	139.04	0.0001695
Peak_00441	4-Ketocyclophosphamide	C7H13Cl2N2O3P	272.997	0.000916
Peak_00761	5,5-Diethylbarbituric acid	C8H12N2O3	185.097	0.0039369
Peak_00762	5,5-Diethylbarbituric acid	C8H12N2O3	185.097	0.0039369
Peak_07774	5,6,7,8-Tetrahydromethanopterin	C30H45N6O16P	775.34	0.085034
Peak_07774	5,6,7,8-Tetrahydromethanopterin	C30H45N6O16P	775.341	0.086034
Peak_07774	5,6,7,8-Tetrahydromethanopterin	C30H45N6O16P	775.34	0.085034
Peak_07775	5,6,7,8-Tetrahydromethanopterin	C30H45N6O16P	775.341	0.086034
Peak_07775	5,6,7,8-Tetrahydromethanopterin	C30H45N6O16P	775.341	0.086034
Peak_07775	5,6,7,8-Tetrahydromethanopterin	C30H45N6O16P	775.34	0.085034
Peak_04214	5,7,2'-Trihydroxy-3,6,4',5'-tetramethoxyflavone	C19H18O9	391.107	0.0034164
Peak_04214	5,7,2'-Trihydroxy-3,6,4',5'-tetramethoxyflavone	C19H18O9	391.107	0.0034164
Peak_04214	5,7,2'-Trihydroxy-3,6,4',5'-tetramethoxyflavone	C19H18O9	391.107	0.0034164
Peak_04214	5,7,2'-Trihydroxy-3,6,4',5'-tetramethoxyflavone	C19H18O9	391.107	0.0034164
Peak_04214	5,7,2'-Trihydroxy-3,6,4',5'-tetramethoxyflavone	C19H18O9	391.107	0.0034164
Peak_03551	5alpha-Cholanoic acid	C24H40O2	361.6	0.289643
Peak_03551	5alpha-Cholanoic acid	C24H40O2	361.6	0.289643
Peak_01801	5'-Deoxy-5'-fluoroadenosine	C10H12FN5O3	270.106	0.0060293
Peak_01801	5'-Deoxy-5'-fluoroadenosine	C10H12FN5O3	270.106	0.0060293
Peak_06360	5-Methyltetrahydrofolic acid	C20H25N7O6	460.204	0.0093003
Peak_06360	5-Methyltetrahydrofolic acid	C20H25N7O6	460.204	0.0093003
Peak_00630	6-Demethylsterigmatocystin	C17H10O6	309.047	0.0073
Peak_00630	6-Demethylsterigmatocystin	C17H10O6	309.047	0.0073
Peak_14486	6'''-Oxoneomycin C	C23H43N5O14	614.184	0.104792
Peak_14486	6'''-Oxoneomycin C	C23H43N5O14	614.184	0.104792
Peak_04483	7alpha-Hydroxy-3,12-dioxochola-1,4-dien-24-oic acid	C24H32O5	401.238	0.0054309
Peak_04483	7alpha-Hydroxy-3,12-dioxochola-1,4-dien-24-oic acid	C24H32O5	401.238	0.0054309
Peak_04483	7alpha-Hydroxy-3,12-dioxochola-1,4-dien-24-oic acid	C24H32O5	401.238	0.0054309
Peak_02077	7-Aminoclonazepam	C15H12ClN3O	286.073	0.0021843
Peak_02077	7-Aminoclonazepam	C15H12ClN3O	286.073	0.0021843
Peak_04435	7-Oxo-cholestenone	C27H42O2	399.327	0.000519
Peak_00291	Acetamidopropanal	C5H9NO2	116.071	5.89e-05
Peak_00291	Acetamidopropanal	C5H9NO2	116.071	5.89e-05
Peak_02152	Acronycidine	C15H15NO5	290.103	0.0001005
Peak_02152	Acronycidine	C15H15NO5	290.103	0.0001005
Peak_02152	Acronycidine	C15H15NO5	290.103	0.0001005
Peak_02724	Acronycine	C20H19NO3	322.15	0.0055419
Peak_04220	Actinorhodin	C32H26O14	633.15	0.0257
Peak_05433	Aggreticin	C37H46O14	713.277	0.003756
Peak_04654	Agrimol C	C36H44O12	667.262	0.013277
Peak_00819	Ala-Asp-Glu	C12H19N3O8	332.107	0.002217
Peak_00847	Ala-Cys	C6H12N2O3S	193.062	0.0032905
Peak_00847	Ala-Cys	C6H12N2O3S	193.062	0.0032905
Peak_03256	Albanol B	C34H22O8	559.185	0.0452485
Peak_10987	Albanol B	C34H22O8	557.084	0.0395
Peak_02480	Allamandin	C15H16O7	309.096	0.0014824
Peak_02480	Allamandin	C15H16O7	309.096	0.0014824
Peak_00160	Alliin	C6H11NO3S	176.029	0.009
Peak_17088	All-trans-heptaprenyl diphosphate	C35H60O7P2	655.399	0.0092382
Peak_17088	All-trans-heptaprenyl diphosphate	C35H60O7P2	655.399	0.0092382
Peak_16370	alpha-Amanitin	C39H54N10O14S	919.304	0.0578099
Peak_31767	alpha-Amanitin	C39H54N10O14S	919.304	0.0578099
Peak_31767	alpha-Amanitin	C39H54N10O14S	917.24	0.106167
Peak_31767	alpha-Amanitin	C39H54N10O14S	919.304	0.0578099
Peak_11458	alpha-Antiarin	C29H42O11	567.258	0.0224122
Peak_01289	alpha-Cyclohexylmandelic acid	C14H18O3	235.131	0.0028687
Peak_03583	Antirrhinoside	C15H22O10	363.134	0.0047365
Peak_05440	Apigenin-7-O-glucoside	C21H20O10	433.141	0.0268297
Peak_05440	Apigenin-7-O-glucoside	C21H20O10	433.141	0.0268297
Peak_05440	Apigenin-7-O-glucoside	C21H20O10	433.141	0.0268297
Peak_00435	Arbutin	C12H16O7	271.083	0.0014
Peak_00435	Arbutin	C12H16O7	271.083	0.0014
Peak_04268	Arg-Asp-Cys	C13H24N6O6S	393.156	0.0001497
Peak_04268	Arg-Asp-Cys	C13H24N6O6S	393.156	0.0001497
Peak_04268	Arg-Asp-Cys	C13H24N6O6S	393.156	0.0001497
Peak_05686	Arg-Cys-Tyr	C18H28N6O5S	441.199	0.0068399
Peak_04455	Arg-Gln-Pro	C16H29N7O5	400.236	0.0046565
Peak_04455	Arg-Gln-Pro	C16H29N7O5	400.236	0.0046565
Peak_04455	Arg-Gln-Pro	C16H29N7O5	400.236	0.0046565
Peak_04455	Arg-Gln-Pro	C16H29N7O5	400.236	0.0046565
Peak_00682	Arginine	C6H14N4O2	175.119	0.0009411
Peak_04457	Arg-Lys-Pro	C17H33N7O4	400.255	0.0122851
Peak_04457	Arg-Lys-Pro	C17H33N7O4	400.255	0.0122851
Peak_04457	Arg-Lys-Pro	C17H33N7O4	400.255	0.0122851
Peak_09058	Arg-Trp-Tyr	C26H33N7O5	524.198	0.0640324
Peak_09058	Arg-Trp-Tyr	C26H33N7O5	524.198	0.0640324
Peak_01038	Asn-Asp-Asp	C12H18N4O9	361.106	0.006619
Peak_00813	Asn-Cys-Pro	C12H20N4O5S	331.104	0.003443
Peak_01519	Asn-Met-Phe	C18H26N4O5S	409.153	0.001393
Peak_03293	Asn-Met-Ser	C12H22N4O6S	351.142	0.0078976
Peak_05022	Asn-Thr-Trp	C19H25N5O6	420.188	0.0003256
Peak_03672	Asp-Cys-Met	C12H21N3O6S2	368.099	0.003586
Peak_03672	Asp-Cys-Met	C12H21N3O6S2	368.099	0.003586
Peak_03672	Asp-Cys-Met	C12H21N3O6S2	368.099	0.003586
Peak_00734	Asp-Cys-Ser	C10H17N3O7S	322.078	0.007276
Peak_05975	Asp-Glu-Trp	C20H24N4O8	449.167	0.000377
Peak_05975	Asp-Glu-Trp	C20H24N4O8	449.167	0.000377
Peak_05975	Asp-Glu-Trp	C20H24N4O8	449.167	0.000377
Peak_04681	Asp-His-His	C16H21N7O6	408.166	0.0026635
Peak_04681	Asp-His-His	C16H21N7O6	408.166	0.0026635
Peak_04681	Asp-His-His	C16H21N7O6	408.166	0.0026635
Peak_06358	Asp-Tyr-Tyr	C22H25N3O8	460.159	0.013077
Peak_03650	Atovaquone	C22H19ClO3	367.1	0.0099335
Peak_03650	Atovaquone	C22H19ClO3	367.097	0.0133232
Peak_03654	Atovaquone	C22H19ClO3	367.097	0.0133232
Peak_03654	Atovaquone	C22H19ClO3	367.1	0.0099335
Peak_05568	Azadirachtin A	C35H44O16	719.185	0.069941
Peak_05568	Azadirachtin A	C35H44O16	719.185	0.069941
Peak_05568	Azadirachtin A	C35H44O16	719.185	0.069941
Peak_05568	Azadirachtin A	C35H44O16	719.185	0.069941
Peak_10934	Azidopine	C27H26F3N5O5	558.198	0.0017215
Peak_10934	Azidopine	C27H26F3N5O5	558.198	0.0017215
Peak_10934	Azidopine	C27H26F3N5O5	558.198	0.0017215
Peak_00255	Benzaldehyde	C7H6O	107.05	0.0001929
Peak_00255	Benzaldehyde	C7H6O	107.05	0.0003345
Peak_00255	Benzaldehyde	C7H6O	107.05	0.0001929
Peak_00258	Benzaldehyde	C7H6O	107.05	0.0001929
Peak_01050	Benzyl Benzoate	C14H12O2	213.092	0.0003603
Peak_14997	Benzyloxycarbonylarginyl-arginine 4-methylcoumarin-7-ylamide	C30H39N9O6	622.282	0.0280588
Peak_14997	Benzyloxycarbonylarginyl-arginine 4-methylcoumarin-7-ylamide	C30H39N9O6	622.276	0.0341544
Peak_14997	Benzyloxycarbonylarginyl-arginine 4-methylcoumarin-7-ylamide	C30H39N9O6	622.276	0.0341544
Peak_14998	Benzyloxycarbonylarginyl-arginine 4-methylcoumarin-7-ylamide	C30H39N9O6	622.276	0.0341544
Peak_00730	beta-Tyrosine	C9H11NO3	182.082	0.0002137
Peak_00730	beta-Tyrosine	C9H11NO3	182.082	0.0002137
Peak_00730	beta-Tyrosine	C9H11NO3	182.082	0.0002137
Peak_04450	Bromocriptine	C32H40BrN5O5	652.162	0.051282
Peak_04450	Bromocriptine	C32H40BrN5O5	652.162	0.051282
Peak_04032	Bryotoxin A	C32H42O12	617.148	0.1116
Peak_04032	Bryotoxin A	C32H42O12	617.209	0.0506
Peak_04038	Bryotoxin A	C32H42O12	617.158	0.1016
Peak_04039	Bryotoxin A	C32H42O12	617.148	0.1116
Peak_28026	Butyryl-CoA	C25H42N7O17P3S	838.299	0.134272
Peak_04301	C19 Sphingosine 1-phosphate	C19H40NO5P	394.264	0.0082628
Peak_19891	Calcein AM	C46H46N2O23	993.304	0.062857
Peak_04935	Calophyllolide	C26H24O5	417.174	0.0035239
Peak_12610	Capsanthin	C40H56O3	585.422	0.0088475
Peak_03381	CAR(13:2)	C20H35NO4	354.273	0.0082816
Peak_03382	CAR(13:2)	C20H35NO4	354.273	0.0084819
Peak_03382	CAR(13:2)	C20H35NO4	354.273	0.0084819
Peak_02655	CAR(DC8:0)	C15H27NO6	318.197	0.005169
Peak_00558	Carboxytolbutamide	C12H16N2O5S	299.076	0.006008
Peak_00558	Carboxytolbutamide	C12H16N2O5S	299.076	0.006008
Peak_03524	Carlinoside	C26H28O15	581.158	0.0072662
Peak_12331	Carlinoside	C26H28O15	581.158	0.0072662
Peak_12331	Carlinoside	C26H28O15	579.135	0.000175
Peak_08576	Carminomycin	C26H27NO10	514.178	0.0066075
Peak_02164	Catechin	C15H14O6	291.088	0.0010813
Peak_02164	Catechin	C15H14O6	291.088	0.0010813
Peak_04357	Cefoperazone	C25H27N9O8S2	644.138	0.0036
Peak_16512	Cefoperazone	C25H27N9O8S2	646.189	0.0385128
Peak_16512	Cefoperazone	C25H27N9O8S2	646.189	0.0385128
Peak_27719	Cephalomannine	C45H53NO14	832.34	0.0141401
Peak_05744	Cer(d14:0/13:0)	C27H55NO3	442.628	0.201374
Peak_05744	Cer(d14:0/13:0)	C27H55NO3	442.628	0.201374
Peak_05744	Cer(d14:0/13:0)	C27H55NO3	442.628	0.201374
Peak_06250	Cer(d14:0/14:0)	C28H57NO3	456.685	0.243439
Peak_06250	Cer(d14:0/14:0)	C28H57NO3	456.685	0.243439
Peak_06567	Cer(d14:1/15:1)	C29H55NO3	466.643	0.217081
Peak_06567	Cer(d14:1/15:1)	C29H55NO3	466.643	0.217081
Peak_12551	Cer(d14:2/24:4)	C38H65NO3	584.474	0.0301975
Peak_20280	Cer(d14:2/32:0)	C46H89NO3	704.741	0.0489348
Peak_19761	Cer(d18:0/26:0(OH))	C44H89NO4	696.76	0.073008
Peak_07766	Cer(m32:0)	C32H65NO2	496.633	0.123376
Peak_07766	Cer(m32:0)	C32H65NO2	496.633	0.123376
Peak_19891	Cer(t17:0/26:0(OH))	C43H87NO5	698.73	0.0635727
Peak_13878	Cerbertin	C32H44O11	605.278	0.0180948
Peak_13878	Cerbertin	C32H44O11	605.278	0.0180948
Peak_09623	Cercosporin	C29H26O10	535.138	0.0230513
Peak_12545	CerP(d14:0/18:4)	C32H58NO6P	584.42	0.011442
Peak_12545	CerP(d14:0/18:4)	C32H58NO6P	584.42	0.011442
Peak_04076	CerP(d15:1/20:5)	C35H60NO6P	620.402	0.0058
Peak_19478	CerP(d21:0/39:0)	C60H122NO6P	983.188	0.295
Peak_14582	CHAPS	C32H58N2O7S	615.404	0.0002814
Peak_03580	Chelirubine	C21H16NO5	363.112	0.0013168
Peak_03580	Chelirubine	C21H16NO5	363.112	0.0013168
Peak_15664	Chlorophyll B	C55H70MgN4O6	905.264	0.242578
Peak_15447	Chlorophyllide b	C35H32MgN4O6	629.189	0.0359185
Peak_00450	Chlorpropamide	C10H13ClN2O3S	275.026	0.0005
Peak_03760	Cholest-5-ene	C27H46	371.606	0.238366
Peak_00753	Choline phosphate	C5H14NO4P	184.074	9.45e-05
Peak_14071	Chymostatin	C31H41N7O6	608.298	0.0218638
Peak_14071	Chymostatin	C31H41N7O6	608.298	0.0218638
Peak_14071	Chymostatin	C31H41N7O6	608.298	0.0218638
Peak_00401	Cis-4-carboxymethylenebut-2-en-4-olide	C6H4O4	141.019	0.0003404
Peak_03059	cis-Erucic acid	C22H42O2	339.329	0.0028818
Peak_05917	Clavulone I	C25H34O7	447.252	0.0134378
Peak_06838	CMP-2-trimethylaminoethylphosphonate	C14H27N4O10P2	474.122	0.0067152
Peak_06838	CMP-2-trimethylaminoethylphosphonate	C14H27N4O10P2	474.122	0.0067152
Peak_06838	CMP-2-trimethylaminoethylphosphonate	C14H27N4O10P2	474.122	0.0067152
Peak_04166	CMP-N-glycoloylneuraminate	C20H31N4O17P	629.173	0.038818
Peak_04166	CMP-N-glycoloylneuraminate	C20H31N4O17P	629.173	0.038818
Peak_32953	Cobalt-precorrin-6B	C44H55CoN4O16	955.341	0.0388748
Peak_32953	Cobalt-precorrin-6B	C44H55CoN4O16	955.341	0.0388748
Peak_16451	Coenzyme F420-1	C24H29N4O15P	645.185	0.0406972
Peak_16451	Coenzyme F420-1	C24H29N4O15P	645.185	0.0406972
Peak_17075	Coproporphyrin I	C36H38N4O8	655.278	0.0009631
Peak_17075	Coproporphyrin I	C36H38N4O8	655.278	0.0009631
Peak_17075	Coproporphyrin I	C36H38N4O8	655.278	0.0009631
Peak_00461	Coumarin	C9H6O2	147.045	0.0005905
Peak_03493	Coumeroic acid	C17H14N2O7	359.083	0.0051817
Peak_01774	Coumestrol	C15H8O5	268.947	0.0984124
Peak_01774	Coumestrol	C15H8O5	268.947	0.0984124
Peak_06659	Cromoglicic acid	C23H16O11	469.136	0.0587848
Peak_06659	Cromoglicic acid	C23H16O11	469.136	0.0587848
Peak_08836	Cucurbitacin F	C30H46O7	519.33	0.0022543
Peak_08836	Cucurbitacin F	C30H46O7	519.33	0.0022543
Peak_08836	Cucurbitacin F	C30H46O7	519.33	0.0022543
Peak_09673	Cyanidin 3-O-(6-O-malonyl-beta-D-glucoside)	C24H23O14	536.113	0.0037234
Peak_09675	Cyanidin 3-O-(6-O-malonyl-beta-D-glucoside)	C24H23O14	536.113	0.0037234
Peak_08605	Cyanidin 3-rutinoside-5-glucoside	C33H41ClO20	791.28	0.100029
Peak_04507	Cyclic di-AMP	C20H24N10O12P2	657.168	0.070961
Peak_04513	Cyclic di-AMP	C20H24N10O12P2	657.097	3.9e-05
Peak_04513	Cyclic di-AMP	C20H24N10O12P2	657.168	0.070961
Peak_16243	Cyclothialidine	C26H35N5O12S	642.217	0.0090288
Peak_04121	Cys-Gln-His	C14H22N6O5S	387.146	0.0003942
Peak_04814	Cys-Gln-Tyr	C17H24N4O6S	413.156	0.0062392
Peak_04814	Cys-Gln-Tyr	C17H24N4O6S	413.156	0.0062392
Peak_04842	Cys-Glu-Tyr	C17H23N3O7S	414.126	0.0080045
Peak_04842	Cys-Glu-Tyr	C17H23N3O7S	414.126	0.0080045
Peak_02610	Cys-Gly-His	C11H17N5O4S	316.082	0.0256321
Peak_02610	Cys-Gly-His	C11H17N5O4S	316.082	0.0256321
Peak_02610	Cys-Gly-His	C11H17N5O4S	316.082	0.0256321
Peak_01823	Cys-Met-Trp	C19H26N4O4S2	437.135	0.00345
Peak_01823	Cys-Met-Trp	C19H26N4O4S2	437.135	0.00345
Peak_04898	Cys-Met-Tyr	C17H25N3O5S2	416.115	0.016949
Peak_00935	Cystathionine ketimine	C7H9NO4S	204.037	0.003762
Peak_00936	Cystathionine ketimine	C7H9NO4S	204.029	0.0045269
Peak_03964	Cytidine monophosphate N-acetylneuraminic acid	C20H31N4O16P	613.14	0.000733
Peak_03964	Cytidine monophosphate N-acetylneuraminic acid	C20H31N4O16P	613.14	0.000733
Peak_03964	Cytidine monophosphate N-acetylneuraminic acid	C20H31N4O16P	613.14	0.000733
Peak_02467	dCMP	C9H14N3O7P	308.038	0.0265683
Peak_02467	dCMP	C9H14N3O7P	308.038	0.0265683
Peak_02467	dCMP	C9H14N3O7P	308.038	0.0265683
Peak_08524	dCpdC	C20H29N6O8P	513.178	0.0086037
Peak_00941	Dehydroascorbic acid dimer	C12H12O12	347.006	0.01888
Peak_07034	Dehydroemetine	C29H38N2O4	479.298	0.0066081
Peak_07034	Dehydroemetine	C29H38N2O4	479.298	0.0066081
Peak_12479	Deinoxanthin	C40H54O3	583.416	0.0010884
Peak_06546	Delphinidin 3-O-beta-D-glucoside	C21H21O12	466.142	0.0309789
Peak_06546	Delphinidin 3-O-beta-D-glucoside	C21H21O12	466.142	0.0309789
Peak_06546	Delphinidin 3-O-beta-D-glucoside	C21H21O12	466.142	0.0309789
Peak_06546	Delphinidin 3-O-beta-D-glucoside	C21H21O12	466.142	0.0309789
Peak_13559	Delphinine	C33H45NO9	600.171	0.146628
Peak_13564	Delphinine	C33H45NO9	600.097	0.220044
Peak_13564	Delphinine	C33H45NO9	600.171	0.146628
Peak_03504	Deserpidine	C32H38N2O8	577.27	0.0152
Peak_03504	Deserpidine	C32H38N2O8	577.27	0.0152
Peak_04713	Devazepide	C25H20N4O2	409.168	0.001012
Peak_04713	Devazepide	C25H20N4O2	409.168	0.001012
Peak_04713	Devazepide	C25H20N4O2	409.168	0.001012
Peak_05071	Dexylosylpradimicin C	C34H34N2O14	693.246	0.052996
Peak_11716	DG(11:0_22:6)	C36H58O5	571.399	0.037315
Peak_11716	DG(11:0_22:6)	C36H58O5	571.399	0.037315
Peak_24664	DG(14:1_33:0)	C50H96O5	777.719	0.0146099
Peak_24664	DG(14:1_33:0)	C50H96O5	777.719	0.0146099
Peak_14457	DG(36:6)	C39H64O5	613.686	0.202571
Peak_04935	DG(42:11)	C45H66O5	685.482	0.001
Peak_13389	DG(O-14:0_21:0)	C38H76O4	597.855	0.273137
Peak_33073	DG(O-22:1_39:0)	C64H126O4	960.3	0.326425
Peak_33073	DG(O-22:1_39:0)	C64H126O4	960.3	0.326425
Peak_33073	DG(O-22:1_39:0)	C64H126O4	960.3	0.326425
Peak_32556	DG(O-60:3)	C63H120O4	942.29	0.363501
Peak_32556	DG(O-60:3)	C63H120O4	942.29	0.363501
Peak_32556	DG(O-60:3)	C63H120O4	942.29	0.363501
Peak_29773	DGDG(11:0_20:3)	C46H80O15	873.56	0.0024487
Peak_29773	DGDG(11:0_20:3)	C46H80O15	873.56	0.0024487
Peak_29773	DGDG(11:0_20:3)	C46H80O15	873.56	0.0024487
Peak_33564	DGDG(17:1_22:6)	C54H88O15	977.3	0.32075
Peak_33564	DGDG(17:1_22:6)	C54H88O15	977.3	0.32075
Peak_33564	DGDG(17:1_22:6)	C54H88O15	977.3	0.32075
Peak_33502	DGDG(17:2_22:6)	C54H86O15	975.291	0.314148
Peak_33502	DGDG(17:2_22:6)	C54H86O15	975.353	0.252053
Peak_33502	DGDG(17:2_22:6)	C54H86O15	975.324	0.280216
Peak_33506	DGDG(17:2_22:6)	C54H86O15	975.291	0.314148
Peak_33506	DGDG(17:2_22:6)	C54H86O15	975.324	0.280216
Peak_33506	DGDG(17:2_22:6)	C54H86O15	975.353	0.252053
Peak_33508	DGDG(17:2_22:6)	C54H86O15	975.291	0.314148
Peak_33508	DGDG(17:2_22:6)	C54H86O15	975.324	0.280216
Peak_33508	DGDG(17:2_22:6)	C54H86O15	975.353	0.252053
Peak_01103	Diacerin	C19H12O8	367.052	0.0068
Peak_01103	Diacerin	C19H12O8	367.052	0.0068
Peak_01103	Diacerin	C19H12O8	367.052	0.0068
Peak_00766	Diethyldithiophosphate	C4H10O2PS2	185.963	0.0310809
Peak_00766	Diethyldithiophosphate	C4H10O2PS2	185.963	0.0310809
Peak_05376	Digitalin	C36H56O14	711.359	1e-05
Peak_05376	Digitalin	C36H56O14	711.337	0.02201
Peak_05378	Digitalin	C36H56O14	711.337	0.02201
Peak_03847	Digitoxigenin	C23H34O4	375.251	0.0026726
Peak_32336	Dimethylnonanoyl-CoA	C32H56N7O17P3S	936.301	0.026583
Peak_32336	Dimethylnonanoyl-CoA	C32H56N7O17P3S	936.301	0.026583
Peak_02433	D-Nopaline	C11H20N4O6	305.143	0.0027846
Peak_00819	Dodecapentaenoic acid	C12H14O2	191.108	0.000174
Peak_00819	Dodecapentaenoic acid	C12H14O2	191.108	0.000174
Peak_05824	Doxycycline	C22H24N2O8	445.092	0.0690118
Peak_02303	D-Prephenyl lactate	C13H14O8	299.077	0.0001248
Peak_00949	D-Tryptophan	C11H12N2O2	205.099	0.0008692
Peak_00949	D-Tryptophan	C11H12N2O2	205.099	0.0008692
Peak_00949	D-Tryptophan	C11H12N2O2	205.099	0.0008692
Peak_06134	Epicatechin 3-O-beta-D-glucoside	C21H24O11	453.11	0.0300735
Peak_01718	Epsilon-rhodomycinone	C22H20O9	427.099	0.0037
Peak_05298	Epsilon-rhodomycinone	C22H20O9	429.117	0.0016542
Peak_05298	Epsilon-rhodomycinone	C22H20O9	429.117	0.0016542
Peak_04436	Esmeraldin B	C38H28N4O7	653.171	0.0325437
Peak_04436	Esmeraldin B	C38H28N4O7	651.159	0.028799
Peak_04438	Esmeraldin B	C38H28N4O7	651.163	0.024799
Peak_16938	Esmeraldin B	C38H28N4O7	651.159	0.028799
Peak_03629	Etoposide	C29H32O13	587.161	0.015291
Peak_03196	Eupatolitin	C17H14O8	347.077	0.0005755
Peak_01974	Exserohilone	C20H22N2O6S2	451.113	0.0133252
Peak_01974	Exserohilone	C20H22N2O6S2	449.074	0.0099
Peak_06046	Exserohilone	C20H22N2O6S2	451.05	0.0495651
Peak_06046	Exserohilone	C20H22N2O6S2	451.05	0.0495651
Peak_06046	Exserohilone	C20H22N2O6S2	451.05	0.0495651
Peak_06046	Exserohilone	C20H22N2O6S2	451.05	0.0495651
Peak_06050	Exserohilone	C20H22N2O6S2	451.113	0.0133252
Peak_06050	Exserohilone	C20H22N2O6S2	449.074	0.0099
Peak_00456	Fenthion	C10H15O3PS2	277.031	0.018978
Peak_00456	Fenthion	C10H15O3PS2	277.031	0.018978
Peak_04770	Flumethasone	C22H28F2O5	411.199	0.0003933
Peak_00766	Fluorodifen	C13H7F3N2O5	326.944	0.078706
Peak_00766	Fluorodifen	C13H7F3N2O5	326.944	0.078706
Peak_05719	Folic acid	C19H19N7O6	442.146	0.0020748
Peak_05719	Folic acid	C19H19N7O6	442.125	0.0225696
Peak_05721	Folic acid	C19H19N7O6	442.146	0.0020748
Peak_05721	Folic acid	C19H19N7O6	442.125	0.0225696
Peak_00392	Fosfomycin	C3H7O4P	139.003	0.0128227
Peak_00392	Fosfomycin	C3H7O4P	139.003	0.0128227
Peak_03310	Fosinopril	C30H46NO7P	562.316	0.022811
Peak_03310	Fosinopril	C30H46NO7P	562.316	0.022811
Peak_03310	Fosinopril	C30H46NO7P	562.316	0.022811
Peak_03733	Fraxin	C16H18O10	371.106	0.0080674
Peak_03733	Fraxin	C16H18O10	371.106	0.0080674
Peak_19474	Fumonisin C2	C33H57NO14	692.22	0.165459
Peak_19474	Fumonisin C2	C33H57NO14	692.22	0.165459
Peak_19478	Fumonisin C2	C33H57NO14	692.245	0.140653
Peak_04733	Fumonisin C4	C33H57NO13	674.182	0.192995
Peak_10198	Galactosyl-N-acetyllactosamine	C20H35NO16	546.199	0.0043252
Peak_10202	Galactosyl-N-acetyllactosamine	C20H35NO16	546.236	0.0321035
Peak_10202	Galactosyl-N-acetyllactosamine	C20H35NO16	546.236	0.0321035
Peak_09673	GalCer(d14:2/28:0)	C48H91NO8	808.833	0.1665
Peak_09678	GalCer(d14:2/28:0)	C48H91NO8	808.917	0.2505
Peak_20386	GalCer(d17:2/39:0)	C62H119NO8	1005.25	0.3674
Peak_22240	GalCer(d20:2/39:0)	C65H125NO8	1047.23	0.3005
Peak_03293	Gambiriin C	C30H26O11	561.163	0.023484
Peak_11224	Gambiriin C	C30H26O11	563.178	0.0220752
Peak_04152	Gambogic acid	C38H44O8	627.3	0.0044
Peak_04152	Gambogic acid	C38H44O8	627.3	0.0044
Peak_04152	Gambogic acid	C38H44O8	627.3	0.0044
Peak_00998	Gentiopicrin	C16H20O9	355.104	0.0013
Peak_00998	Gentiopicrin	C16H20O9	355.104	0.0013
Peak_06018	Glisoxepide	C20H27N5O5S	450.169	0.0119295
Peak_06018	Glisoxepide	C20H27N5O5S	450.169	0.0119295
Peak_06018	Glisoxepide	C20H27N5O5S	450.169	0.0119295
Peak_02124	Gln-Gln-Trp	C21H28N6O6	459.187	0.012034
Peak_02124	Gln-Gln-Trp	C21H28N6O6	459.187	0.012034
Peak_02124	Gln-Gln-Trp	C21H28N6O6	459.187	0.012034
Peak_04073	Gln-His-Thr	C15H24N6O6	385.187	0.0034837
Peak_04076	Gln-His-Thr	C15H24N6O6	385.187	0.0034837
Peak_05656	Glu-Glu-Tyr	C19H25N3O9	440.158	0.0094803
Peak_05656	Glu-Glu-Tyr	C19H25N3O9	440.158	0.0094803
Peak_05656	Glu-Glu-Tyr	C19H25N3O9	440.158	0.0094803
Peak_04684	Glu-Ile-Phe	C20H29N3O6	408.204	0.0095894
Peak_04684	Glu-Ile-Phe	C20H29N3O6	408.204	0.0095894
Peak_04684	Glu-Ile-Phe	C20H29N3O6	408.204	0.0095894
Peak_05724	Glu-Phe-Phe	C23H27N3O6	442.201	0.0032436
Peak_07647	Glyburide	C23H28ClN3O5S	494.133	0.0188713
Peak_01504	Gly-Phe-Trp	C22H24N4O4	407.172	0.000244
Peak_11095	Gossypetin 8-glucoside-3-sulfate	C21H20O16S	561.049	0.0065856
Peak_02419	Gossypin	C21H20O13	479.089	0.0066
Peak_05750	Granaticin	C23H22O9	443.126	0.0082328
Peak_05759	Granaticin	C23H22O9	442.802	0.332634
Peak_05759	Granaticin	C23H22O9	443.126	0.0082328
Peak_05759	Granaticin	C23H22O9	443.126	0.0082328
Peak_09678	Grepafloxacin glucuronide	C25H30FN3O9	536.174	0.0310153
Peak_02727	Griseorhodin A	C25H16O12	507.114	0.0578
Peak_08324	Griseorhodin A	C25H16O12	509.128	0.0559828
Peak_14133	Gyrocarpine	C37H40N2O6	609.299	0.0026448
Peak_14133	Gyrocarpine	C37H40N2O6	609.299	0.0026448
Peak_14133	Gyrocarpine	C37H40N2O6	609.299	0.0026448
Peak_02391	Haematoxylin	C16H14O6	303.085	0.0020328
Peak_02391	Haematoxylin	C16H14O6	303.085	0.0020328
Peak_02391	Haematoxylin	C16H14O6	303.085	0.0020328
Peak_04322	Haemocorin	C32H34O14	641.176	0.0109
Peak_04322	Haemocorin	C32H34O14	641.176	0.0109
Peak_01949	Haplanthin	C22H24O10	447.137	0.008
Peak_17222	Hellicoside	C29H36O17	657.22	0.0163736
Peak_17222	Hellicoside	C29H36O17	657.22	0.0163736
Peak_17222	Hellicoside	C29H36O17	657.22	0.0163736
Peak_03998	Heme	C34H32FeN4O4	615.118	0.0513
Peak_03998	Heme	C34H32FeN4O4	615.158	0.0113
Peak_04000	Heme	C34H32FeN4O4	615.115	0.0543
Peak_04002	Heme	C34H32FeN4O4	615.118	0.0513
Peak_14680	Heme	C34H32FeN4O4	617.189	0.0036771
Peak_06084	Hentriacontan-16-one	C31H62O	451.623	0.135011
Peak_01303	Heptyl 4-hydroxybenzoate	C14H20O3	237.149	0.0001967
Peak_24016	Hex2Cer(d14:1/12:0(OH))	C38H71NO14	766.495	0.0008181
Peak_28422	Hex2Cer(d14:2/18:1(OH))	C44H79NO14	846.329	0.229493
Peak_32924	Hex2Cer(d15:2/26:2)	C53H95NO13	954.316	0.371813
Peak_32925	Hex2Cer(d15:2/26:2)	C53H95NO13	954.343	0.345276
Peak_32926	Hex2Cer(d15:2/26:2)	C53H95NO13	954.313	0.375541
Peak_32926	Hex2Cer(d15:2/26:2)	C53H95NO13	954.343	0.345276
Peak_01985	Hexachlorobenzene	C6Cl6	282.588	0.232807
Peak_01985	Hexachlorobenzene	C6Cl6	282.588	0.232807
Peak_01985	Hexachlorobenzene	C6Cl6	282.588	0.232807
Peak_00412	Homocystine	C8H16N2O4S2	267.051	0.003852
Peak_02894	Hydroxyheneicosahexaenoic acid	C21H30O3	331.226	0.0015339
Peak_02894	Hydroxyheneicosahexaenoic acid	C21H30O3	331.226	0.0015339
Peak_02894	Hydroxyheneicosahexaenoic acid	C21H30O3	331.226	0.0015339
Peak_01204	Hydroxytridecadienoic acid	C13H22O3	227.164	0.0013107
Peak_02655	Hydroxytritriacontapentaenoic acid	C33H56O3	499.378	0.036945
Peak_03732	IACI	C26H27IN6O3	595.131	0.019906
Peak_03732	IACI	C26H27IN6O3	595.131	0.019906
Peak_00761	Ile-Pro-Val	C16H29N3O4	326.187	0.020807
Peak_00762	Ile-Pro-Val	C16H29N3O4	326.188	0.019807
Peak_03236	IMP	C10H13N4O8P	349.078	0.0232683
Peak_00790	Indoleacrylic acid	C11H9NO2	188.072	0.0007502
Peak_00790	Indoleacrylic acid	C11H9NO2	188.072	0.0007502
Peak_00790	Indoleacrylic acid	C11H9NO2	188.072	0.0007502
Peak_02510	Inodxyl glucuronide	C14H15NO7	310.099	0.0061377
Peak_02510	Inodxyl glucuronide	C14H15NO7	310.099	0.0061377
Peak_04383	Iodoquinol	C9H5I2NO	397.755	0.0990127
Peak_03735	Isobutrin	C27H32O15	595.166	0.000125
Peak_01314	Isopropyl beta-D-thiogalactoside	C9H18O5S	239.097	0.0010206
Peak_00552	Isopropylmaleate	C7H10O4	159.066	0.0005112
Peak_00558	Isopropylmaleate	C7H10O4	159.066	0.0001013
Peak_00558	Isopropylmaleate	C7H10O4	159.066	0.0005112
Peak_02143	Isoscoparin	C22H22O11	461.109	0.0008
Peak_02602	Jatrophatrione	C20H26O3	315.196	3.59e-05
Peak_02602	Jatrophatrione	C20H26O3	315.196	3.59e-05
Peak_03342	Joro spider toxin	C27H47N7O6	564.332	0.018782
Peak_03342	Joro spider toxin	C27H47N7O6	564.332	0.018782
Peak_03342	Joro spider toxin	C27H47N7O6	564.332	0.018782
Peak_07582	Kaempferol 3-sophorotrioside	C33H40O21	771.214	0.0158
Peak_05378	Ketoprofen glucuronide	C22H22O9	431.156	0.0219679
Peak_05378	Ketoprofen glucuronide	C22H22O9	431.156	0.0219679
Peak_05378	Ketoprofen glucuronide	C22H22O9	431.156	0.0219679
Peak_03836	Kievitone hydrate	C20H22O7	375.145	0.0007115
Peak_03836	Kievitone hydrate	C20H22O7	375.145	0.0007115
Peak_02049	Kinamycin D	C22H18N2O9	455.12	0.0108067
Peak_06201	Kinamycin D	C22H18N2O9	453.096	0.0028
Peak_04226	Lactodifucotetraose	C24H42O19	633.18	0.044
Peak_04062	Lanceotoxin A	C32H44O12	619.168	0.1073
Peak_14935	Lanceotoxin A	C32H44O12	621.272	0.0193731
Peak_14935	Lanceotoxin A	C32H44O12	621.272	0.0193731
Peak_14935	Lanceotoxin A	C32H44O12	621.272	0.0193731
Peak_04633	Lancerin	C19H18O10	407.033	0.0651765
Peak_19989	Lasiodine A	C39H49N5O7	700.362	0.0093429
Peak_19989	Lasiodine A	C39H49N5O7	700.362	0.0093429
Peak_19989	Lasiodine A	C39H49N5O7	700.362	0.0093429
Peak_02837	Latamoxef	C20H20N6O9S	519.148	0.054753
Peak_01820	Leflunomide	C12H9F3N2O2	271.071	0.0009218
Peak_01820	Leflunomide	C12H9F3N2O2	271.071	0.0009218
Peak_01820	Leflunomide	C12H9F3N2O2	271.071	0.0009218
Peak_07523	Leucomycin a5	C39H65NO14	772.24	0.20832
Peak_24337	Leucomycin a5	C39H65NO14	770.223	0.2095
Peak_24337	Leucomycin a5	C39H65NO14	772.24	0.20832
Peak_21376	Linoleoyl-CoA	C39H66N7O17P3S	1028.34	0.0051
Peak_02472	LPA(22:5)	C25H41O7P	483.245	0.006
Peak_02472	LPA(22:5)	C25H41O7P	483.245	0.006
Peak_02473	LPA(22:5)	C25H41O7P	483.245	0.006
Peak_08626	LPA(24:4)	C27H47O7P	515.322	0.0084868
Peak_08626	LPA(24:4)	C27H47O7P	515.322	0.0084868
Peak_02774	LPA(24:5)	C27H45O7P	511.276	0.0063
Peak_02774	LPA(24:5)	C27H45O7P	511.276	0.0063
Peak_02774	LPA(24:5)	C27H45O7P	511.276	0.0063
Peak_08878	LPC(0:0/18:2)	C26H50NO7P	520.342	0.00174
Peak_08878	LPC(0:0/18:2)	C26H50NO7P	520.342	0.00174
Peak_06184	LPC(13:0)	C21H44NO7P	454.293	0.0001744
Peak_06184	LPC(13:0)	C21H44NO7P	454.293	0.0001744
Peak_06184	LPC(13:0)	C21H44NO7P	454.293	0.0001744
Peak_08777	LPC(18:3(6Z,9Z,12Z))	C26H48NO7P	518.326	0.0013785
Peak_08777	LPC(18:3(6Z,9Z,12Z))	C26H48NO7P	518.326	0.0013785
Peak_08777	LPC(18:3(6Z,9Z,12Z))	C26H48NO7P	518.326	0.0013785
Peak_08678	LPC(18:4)	C26H46NO7P	516.327	0.0174137
Peak_09988	LPC(20:5)	C28H48NO7P	542.33	0.0052395
Peak_09988	LPC(20:5)	C28H48NO7P	542.33	0.0052395
Peak_09993	LPC(20:5)	C28H48NO7P	542.341	0.0163685
Peak_13584	LPC(24:4)	C32H58NO7P	600.413	0.009511
Peak_13584	LPC(24:4)	C32H58NO7P	600.413	0.009511
Peak_02341	LPE(18:3)	C23H42NO7P	474.263	0.0011
Peak_02341	LPE(18:3)	C23H42NO7P	476.279	0.0009524
Peak_06916	LPE(18:3)	C23H42NO7P	474.263	0.0011
Peak_06916	LPE(18:3)	C23H42NO7P	476.279	0.0009524
Peak_10802	LPE(24:5)	C29H50NO7P	556.181	0.159547
Peak_09731	LPG(20:2)	C26H49O9P	537.306	0.0129884
Peak_09731	LPG(20:2)	C26H49O9P	537.306	0.0129884
Peak_03328	LPG(22:2)	C28H53O9P	563.319	0.0157
Peak_03328	LPG(22:2)	C28H53O9P	563.319	0.0157
Peak_03328	LPG(22:2)	C28H53O9P	563.319	0.0157
Peak_03283	LPG(22:4)	C28H49O9P	559.314	0.0106
Peak_03283	LPG(22:4)	C28H49O9P	559.314	0.0106
Peak_03283	LPG(22:4)	C28H49O9P	559.314	0.0106
Peak_14575	LPG(26:5)	C32H55O9P	615.375	0.0082121
Peak_06595	LPG(P-16:1)/LPG(O-16:2)	C22H43O8P	467.28	0.0024373
Peak_07812	LPG(P-18:0)/LPG(O-18:1)	C24H49O8P	497.334	0.0097301
Peak_11338	LPGP(16:0)	C22H46O12P2	565.251	0.0032774
Peak_11950	LPGP(17:2)	C23H44O12P2	575.226	0.0130292
Peak_11950	LPGP(17:2)	C23H44O12P2	575.226	0.0130292
Peak_11950	LPGP(17:2)	C23H44O12P2	575.233	0.0059549
Peak_11951	LPGP(17:2)	C23H44O12P2	575.226	0.0130292
Peak_14009	LPGP(19:0)	C25H52O12P2	607.294	0.0076717
Peak_14009	LPGP(19:0)	C25H52O12P2	607.294	0.0076717
Peak_14009	LPGP(19:0)	C25H52O12P2	607.294	0.0076717
Peak_18509	LPGP(24:0)	C30H62O12P2	677.373	0.0063588
Peak_18509	LPGP(24:0)	C30H62O12P2	677.377	0.0027528
Peak_18511	LPGP(24:0)	C30H62O12P2	677.402	0.0223853
Peak_18519	LPGP(24:0)	C30H62O12P2	677.377	0.0027528
Peak_18519	LPGP(24:0)	C30H62O12P2	677.402	0.0223853
Peak_05141	LPGP(26:2)	C32H62O12P2	699.382	0.018344
Peak_05141	LPGP(26:2)	C32H62O12P2	699.382	0.018344
Peak_05141	LPGP(26:2)	C32H62O12P2	699.382	0.018344
Peak_02802	LPI(12:0)	C21H41O12P	515.25	0.024432
Peak_02802	LPI(12:0)	C21H41O12P	517.254	0.0123103
Peak_02802	LPI(12:0)	C21H41O12P	515.25	0.024432
Peak_08722	LPI(12:0)	C21H41O12P	517.254	0.0123103
Peak_08722	LPI(12:0)	C21H41O12P	515.25	0.024432
Peak_08722	LPI(12:0)	C21H41O12P	517.254	0.0123103
Peak_03741	LPI(18:2)	C27H49O12P	595.289	0.0008
Peak_03717	LPI(18:3)	C27H47O12P	593.273	0.0005
Peak_03717	LPI(18:3)	C27H47O12P	593.273	0.0005
Peak_03717	LPI(18:3)	C27H47O12P	593.273	0.0005
Peak_03239	LPI(P-16:0)/LPI(O-16:1)	C25H49O11P	555.286	0.007253
Peak_03239	LPI(P-16:0)/LPI(O-16:1)	C25H49O11P	555.286	0.007253
Peak_03239	LPI(P-16:0)/LPI(O-16:1)	C25H49O11P	555.286	0.007253
Peak_04785	LPIP(18:1)	C27H52O15P2	677.198	0.072151
Peak_04689	LPIP(18:4)	C27H46O15P2	673.214	0.0253127
Peak_18259	LPIP(18:4)	C27H46O15P2	671.133	0.090201
Peak_19667	LPIP(19:0)	C28H56O15P2	695.295	0.0221081
Peak_19667	LPIP(19:0)	C28H56O15P2	695.295	0.0221081
Peak_20425	LPIP(20:1)	C29H56O15P2	707.24	0.0777674
Peak_20427	LPIP(20:1)	C29H56O15P2	707.295	0.0228587
Peak_20428	LPIP(20:1)	C29H56O15P2	707.256	0.0611673
Peak_20428	LPIP(20:1)	C29H56O15P2	707.295	0.0228587
Peak_05996	LPIP(22:1)	C31H60O15P2	733.199	0.133751
Peak_05999	LPIP(22:1)	C31H60O15P2	733.265	0.067751
Peak_07870	LPIP(25:0)	C34H68O15P2	777.355	0.040351
Peak_08503	LPIP(26:1)	C35H68O15P2	789.354	0.041351
Peak_08503	LPIP(26:1)	C35H68O15P2	789.354	0.041351
Peak_08503	LPIP(26:1)	C35H68O15P2	789.354	0.041351
Peak_10350	LPIP(28:0)	C37H74O15P2	819.263	0.179301
Peak_16049	LPIP(O-16:0)	C25H52O14P2	639.283	0.0078258
Peak_16049	LPIP(O-16:0)	C25H52O14P2	639.283	0.0078258
Peak_16049	LPIP(O-16:0)	C25H52O14P2	639.283	0.0078258
Peak_19537	LPIP(O-20:1)	C29H58O14P2	693.206	0.132609
Peak_05663	LPIP(O-22:0)	C31H64O14P2	721.367	0.002136
Peak_05663	LPIP(O-22:0)	C31H64O14P2	721.367	0.002136
Peak_05663	LPIP(O-22:0)	C31H64O14P2	721.367	0.002136
Peak_17604	LPIP2(11:0)	C20H41O18P3	663.194	0.0355896
Peak_20178	LPIP2(14:1)	C23H45O18P3	703.187	0.0027721
Peak_21883	LPIP2(16:1)	C25H49O18P3	731.181	0.0397197
Peak_22742	LPIP2(17:1)	C26H51O18P3	745.189	0.0482274
Peak_22742	LPIP2(17:1)	C26H51O18P3	745.189	0.0482274
Peak_22612	LPIP2(17:2)	C26H49O18P3	743.201	0.0199432
Peak_22612	LPIP2(17:2)	C26H49O18P3	743.201	0.0199432
Peak_23581	LPIP2(18:1)	C27H53O18P3	759.221	0.0312908
Peak_23447	LPIP2(18:2)	C27H51O18P3	757.198	0.0384676
Peak_23447	LPIP2(18:2)	C27H51O18P3	757.198	0.0384676
Peak_23447	LPIP2(18:2)	C27H51O18P3	757.198	0.0384676
Peak_23447	LPIP2(18:2)	C27H51O18P3	757.198	0.0384676
Peak_06771	LPIP2(18:3)	C27H49O18P3	753.189	0.016184
Peak_06771	LPIP2(18:3)	C27H49O18P3	753.189	0.016184
Peak_25265	LPIP2(20:1)	C29H57O18P3	787.232	0.0517415
Peak_25142	LPIP2(20:2)	C29H55O18P3	785.237	0.0314833
Peak_25029	LPIP2(20:3)	C29H53O18P3	783.276	0.0234516
Peak_25031	LPIP2(20:3)	C29H53O18P3	783.256	0.0035733
Peak_24896	LPIP2(20:4)	C29H51O18P3	781.275	0.0382214
Peak_24896	LPIP2(20:4)	C29H51O18P3	781.275	0.0382214
Peak_24896	LPIP2(20:4)	C29H51O18P3	781.275	0.0382214
Peak_24762	LPIP2(20:5)	C29H49O18P3	779.255	0.0333627
Peak_24762	LPIP2(20:5)	C29H49O18P3	779.255	0.0333627
Peak_26182	LPIP2(21:0)	C30H61O18P3	803.257	0.058301
Peak_26182	LPIP2(21:0)	C30H61O18P3	803.257	0.058301
Peak_26182	LPIP2(21:0)	C30H61O18P3	803.257	0.058301
Peak_10088	LPIP2(22:0)	C31H63O18P3	815.246	0.068734
Peak_10088	LPIP2(22:0)	C31H63O18P3	815.277	0.037734
Peak_10088	LPIP2(22:0)	C31H63O18P3	817.289	0.0413351
Peak_10091	LPIP2(22:0)	C31H63O18P3	817.318	0.0123556
Peak_10091	LPIP2(22:0)	C31H63O18P3	815.246	0.068734
Peak_10091	LPIP2(22:0)	C31H63O18P3	815.277	0.037734
Peak_26974	LPIP2(22:0)	C31H63O18P3	817.289	0.0413351
Peak_26975	LPIP2(22:0)	C31H63O18P3	817.318	0.0123556
Peak_26975	LPIP2(22:0)	C31H63O18P3	817.235	0.0956814
Peak_26975	LPIP2(22:0)	C31H63O18P3	815.277	0.037734
Peak_26978	LPIP2(22:0)	C31H63O18P3	815.246	0.068734
Peak_26978	LPIP2(22:0)	C31H63O18P3	817.289	0.0413351
Peak_09955	LPIP2(22:1)	C31H61O18P3	815.316	0.0012928
Peak_09955	LPIP2(22:1)	C31H61O18P3	815.354	0.0393624
Peak_26874	LPIP2(22:1)	C31H61O18P3	815.287	0.0283024
Peak_26874	LPIP2(22:1)	C31H61O18P3	813.296	0.003084
Peak_26877	LPIP2(22:1)	C31H61O18P3	815.316	0.0012928
Peak_26877	LPIP2(22:1)	C31H61O18P3	815.354	0.0393624
Peak_26878	LPIP2(22:1)	C31H61O18P3	815.287	0.0283024
Peak_26878	LPIP2(22:1)	C31H61O18P3	813.296	0.003084
Peak_27676	LPIP2(23:0)	C32H65O18P3	831.26	0.0864701
Peak_28378	LPIP2(24:0)	C33H67O18P3	845.325	0.0368379
Peak_28378	LPIP2(24:0)	C33H67O18P3	845.325	0.0368379
Peak_27983	LPIP2(24:4)	C33H59O18P3	837.296	0.0032239
Peak_29656	LPIP2(26:1)	C35H69O18P3	871.265	0.112768
Peak_19491	LPIP2(34:0)	C43H87O18P3	983.297	0.205534
Peak_06412	LPIP2(O-18:0)	C27H57O17P3	745.272	0.000869
Peak_08976	LPIP2(P-22:1)	C31H61O17P3	797.313	0.008831
Peak_22607	LPIP3(11:0)	C20H42O21P4	743.147	0.0219522
Peak_23445	LPIP3(12:0)	C21H44O21P4	757.181	0.0405445
Peak_09820	LPIP3(16:0)	C25H52O21P4	811.228	0.040833
Peak_09820	LPIP3(16:0)	C25H52O21P4	811.228	0.040833
Peak_09820	LPIP3(16:0)	C25H52O21P4	811.228	0.040833
Peak_09696	LPIP3(16:1)	C25H50O21P4	809.177	0.005483
Peak_12403	LPIP3(19:0)	C28H58O21P4	853.207	0.027117
Peak_13186	LPIP3(20:1)	C29H58O21P4	865.199	0.035117
Peak_13187	LPIP3(20:1)	C29H58O21P4	867.22	0.0303324
Peak_29442	LPIP3(20:1)	C29H58O21P4	865.2	0.034117
Peak_29446	LPIP3(20:1)	C29H58O21P4	867.261	0.010562
Peak_12812	LPIP3(20:4)	C29H52O21P4	859.259	0.071833
Peak_12812	LPIP3(20:4)	C29H52O21P4	859.259	0.071833
Peak_16243	LPIP3(24:4)	C33H60O21P4	915.298	0.048233
Peak_18099	LPIP3(26:0)	C35H72O21P4	953.346	0.0141406
Peak_32889	LPIP3(26:0)	C35H72O21P4	953.31	0.0501538
Peak_32890	LPIP3(26:0)	C35H72O21P4	953.348	0.0117886
Peak_32891	LPIP3(26:0)	C35H72O21P4	951.292	0.051667
Peak_18726	LPIP3(27:0)	C36H74O21P4	965.331	0.028317
Peak_18726	LPIP3(27:0)	C36H74O21P4	965.331	0.028317
Peak_22840	LPIP3(34:0)	C43H88O21P4	1063.28	0.189867
Peak_07472	LPIP3(O-14:0)	C23H50O20P4	769.221	0.044398
Peak_07472	LPIP3(O-14:0)	C23H50O20P4	769.217	0.040398
Peak_07473	LPIP3(O-14:0)	C23H50O20P4	769.221	0.044398
Peak_07473	LPIP3(O-14:0)	C23H50O20P4	769.217	0.040398
Peak_24287	LPIP3(O-14:0)	C23H50O20P4	771.238	0.0453408
Peak_08852	LPIP3(O-16:1)	C25H52O20P4	795.233	0.040748
Peak_08852	LPIP3(O-16:1)	C25H52O20P4	795.233	0.040748
Peak_08852	LPIP3(O-16:1)	C25H52O20P4	795.233	0.040748
Peak_08852	LPIP3(O-16:1)	C25H52O20P4	795.233	0.040748
Peak_10717	LPIP3(O-18:0)	C27H58O20P4	825.289	0.049798
Peak_12415	LPIP3(O-20:0)	C29H62O20P4	853.314	0.043498
Peak_07379	LPIP3(P-14:0)	C23H48O20P4	767.277	0.116048
Peak_07161	LPS(15:1)	C21H40NO9P	482.241	0.0113383
Peak_07161	LPS(15:1)	C21H40NO9P	482.241	0.0113383
Peak_07161	LPS(15:1)	C21H40NO9P	482.241	0.0113383
Peak_07857	LPS(16:0)	C22H44NO9P	498.316	0.0326354
Peak_07857	LPS(16:0)	C22H44NO9P	498.315	0.0315247
Peak_07860	LPS(16:0)	C22H44NO9P	498.315	0.0315247
Peak_13704	LPS(24:4)	C30H52NO9P	602.224	0.121697
Peak_03745	LPS(24:6)	C30H48NO9P	596.134	0.1647
Peak_04143	LPS(26:5)	C32H54NO9P	626.181	0.1646
Peak_03015	Luteolin 7-O-(6''-malonylglucoside)	C24H22O14	533.094	0.001
Peak_03866	Lys-Lys-Thr	C16H33N5O5	376.254	0.0019869
Peak_02931	Mahuannin D	C30H24O9	527.108	0.026035
Peak_02931	Mahuannin D	C30H24O9	527.103	0.031035
Peak_02932	Mahuannin D	C30H24O9	527.103	0.031035
Peak_02932	Mahuannin D	C30H24O9	527.108	0.026035
Peak_04413	Malonylapiin	C29H30O17	649.178	0.037701
Peak_10850	Maltopentaose	C30H52O26	827.319	0.052318
Peak_27579	Maltopentaose	C30H52O26	829.302	0.0193965
Peak_27581	Maltopentaose	C30H52O26	829.259	0.0241114
Peak_27581	Maltopentaose	C30H52O26	829.302	0.0193965
Peak_01665	Mannitol 1-phosphate	C6H15O9P	263.018	0.0355626
Peak_01665	Mannitol 1-phosphate	C6H15O9P	263.018	0.0355626
Peak_01665	Mannitol 1-phosphate	C6H15O9P	263.018	0.0355626
Peak_01665	Mannitol 1-phosphate	C6H15O9P	263.018	0.0355626
Peak_01665	Mannitol 1-phosphate	C6H15O9P	263.018	0.0355626
Peak_01665	Mannitol 1-phosphate	C6H15O9P	263.018	0.0355626
Peak_00776	MCOCH	C17H28O6	327.185	0.00441
Peak_03441	MET-enkephalin	C27H35N5O7S	572.206	0.011719
Peak_11899	MET-enkephalin	C27H35N5O7S	574.224	0.0094807
Peak_11899	MET-enkephalin	C27H35N5O7S	574.224	0.0094807
Peak_11899	MET-enkephalin	C27H35N5O7S	574.224	0.0094807
Peak_01317	methyl 9-hydroperoxy-10,12,13,15-bisepidioxy-16E-octadecenoate	C19H32O8	387.201	0.000721
Peak_01770	Metoprolol	C15H25NO3	268.18	0.0117898
Peak_03506	MG(0:0/18:0/0:0)	C21H42O4	359.584	0.268085
Peak_03356	MG(18:3)	C21H36O4	353.27	0.0006387
Peak_03356	MG(18:3)	C21H36O4	353.27	0.0002443
Peak_03357	MG(18:3)	C21H36O4	353.27	0.0006387
Peak_03358	MG(18:3)	C21H36O4	353.27	0.0007715
Peak_20452	MGDG(11:0_20:5)	C40H66O10	707.471	0.0030211
Peak_24303	MGDG(18:4_18:4)	C45H70O10	771.502	0.0024948
Peak_01782	Moclobemide	C13H17ClN2O2	269.104	0.002056
Peak_01782	Moclobemide	C13H17ClN2O2	269.104	0.002056
Peak_01782	Moclobemide	C13H17ClN2O2	269.104	0.002056
Peak_02714	Mucronine A	C29H38N4O4	507.297	0.0008
Peak_08262	Mucronine A	C29H38N4O4	505.282	0.000694
Peak_18925	Mycothione	C34H58N4O24S2	969.254	0.02624
Peak_18925	Mycothione	C34H58N4O24S2	969.254	0.02624
Peak_02575	Myricetin 3-glucuronide	C21H18O14	493.063	0.0013
Peak_02575	Myricetin 3-glucuronide	C21H18O14	493.063	0.0013
Peak_07683	Myricetin 3-glucuronide	C21H18O14	495.078	0.0006481
Peak_07728	N(6)-(Dimethylallyl)adenosine 5'-diphosphate	C15H23N5O10P2	496.132	0.0317986
Peak_07728	N(6)-(Dimethylallyl)adenosine 5'-diphosphate	C15H23N5O10P2	496.132	0.0317986
Peak_02182	N4-Acetylsulfapyridine	C13H13N3O3S	292.067	0.0090339
Peak_02182	N4-Acetylsulfapyridine	C13H13N3O3S	292.067	0.0090339
Peak_04815	N6-Carbamoyl-L-threonyladenosine	C15H20N6O8	413.144	0.0015381
Peak_04815	N6-Carbamoyl-L-threonyladenosine	C15H20N6O8	413.144	0.0015381
Peak_03808	N-Acetylmuramic acid 6-phosphate	C11H20NO11P	374.078	0.0078795
Peak_22801	NADPH	C21H30N7O17P3	746.194	0.0945394
Peak_02469	N-Allyladenosine	C13H17N5O4	308.134	0.0024172
Peak_04656	Nandrolone phenpropionate	C27H34O3	407.259	5.53e-05
Peak_01851	Naringenin	C15H12O5	273.076	5.8e-06
Peak_04528	Neocarzinostatin chromophore	C35H33NO12	658.171	0.021276
Peak_02390	Neostigmine bromide	C12H19BrN2O2	303.069	0.0023552
Peak_02390	Neostigmine bromide	C12H19BrN2O2	303.069	0.0023552
Peak_03667	Nervonic acid	C24H46O2	367.6	0.242102
Peak_03667	Nervonic acid	C24H46O2	367.6	0.242102
Peak_03667	Nervonic acid	C24H46O2	367.6	0.242102
Peak_00740	N-Glycoloylneuraminate	C11H18NO10	323.073	0.012071
Peak_01976	Nitrazepam	C15H11N3O3	282.086	0.0022707
Peak_01976	Nitrazepam	C15H11N3O3	282.086	0.0022707
Peak_00514	N-Methylethanolamine phosphate	C3H10NO4P	156.043	2.51e-05
Peak_00514	N-Methylethanolamine phosphate	C3H10NO4P	156.043	2.51e-05
Peak_00467	N-Methyl-N'-nitro-N-nitrosoguanidine	C2H5N5O3	148.048	0.0010835
Peak_00467	N-Methyl-N'-nitro-N-nitrosoguanidine	C2H5N5O3	148.048	0.0010835
Peak_22118	Nonadecanoyl-CoA	C40H70N7O17P3S	1044.42	0.0488
Peak_22118	Nonadecanoyl-CoA	C40H70N7O17P3S	1044.42	0.0488
Peak_22118	Nonadecanoyl-CoA	C40H70N7O17P3S	1044.42	0.0488
Peak_02148	N-Succinyl-2-amino-6-ketopimelate	C11H15NO8	290.074	0.013722
Peak_02148	N-Succinyl-2-amino-6-ketopimelate	C11H15NO8	290.074	0.013722
Peak_02148	N-Succinyl-2-amino-6-ketopimelate	C11H15NO8	290.074	0.013722
Peak_01459	Olivacine	C17H14N2	247.119	0.0050547
Peak_02124	Orotidine	C10H12N2O8	289.063	0.0048559
Peak_02125	Orotidine	C10H12N2O8	289.065	0.0023632
Peak_00552	Ostruthin	C19H22O3	297.153	0.0041
Peak_14416	Oxidized glutathione	C20H32N6O12S2	613.183	0.0229896
Peak_14416	Oxidized glutathione	C20H32N6O12S2	613.183	0.0229896
Peak_14416	Oxidized glutathione	C20H32N6O12S2	613.183	0.0229896
Peak_03848	PA(10:0_19:0)	C32H63O8P	605.406	0.012058
Peak_03848	PA(10:0_19:0)	C32H63O8P	605.406	0.012058
Peak_16064	PA(10:0_22:5)	C35H59O8P	639.403	4.59e-05
Peak_16064	PA(10:0_22:5)	C35H59O8P	639.403	4.59e-05
Peak_13516	PA(11:0_18:4)	C32H55O8P	599.41	0.0389792
Peak_20717	PA(13:0_24:4)	C40H71O8P	711.493	0.0038624
Peak_20724	PA(13:0_24:4)	C40H71O8P	711.475	0.0218684
Peak_05279	PA(15:0_22:5)	C40H69O8P	707.466	0.000992
Peak_05280	PA(15:0_22:5)	C40H69O8P	707.467	0.001992
Peak_05280	PA(15:0_22:5)	C40H69O8P	707.466	0.000992
Peak_05233	PA(15:0_22:6)	C40H67O8P	705.452	0.002642
Peak_20451	PA(15:0_22:6)	C40H67O8P	707.465	0.0001375
Peak_22392	PA(15:0_24:4)	C42H75O8P	739.509	0.018909
Peak_04885	PA(15:1_20:2)	C38H69O8P	683.467	0.001992
Peak_04885	PA(15:1_20:2)	C38H69O8P	683.467	0.001992
Peak_04885	PA(15:1_20:2)	C38H69O8P	685.482	0.0012156
Peak_19027	PA(15:1_20:2)	C38H69O8P	683.467	0.001992
Peak_06953	PA(16:1/4:1)	C23H41O8P	477.282	0.019809
Peak_07621	PA(17:0/4:1)	C24H45O8P	493.307	0.0136073
Peak_07621	PA(17:0/4:1)	C24H45O8P	493.307	0.0136073
Peak_07621	PA(17:0/4:1)	C24H45O8P	493.307	0.0136073
Peak_05334	PA(17:0_20:4)	C40H71O8P	709.483	0.0023
Peak_07531	PA(17:1/4:1)	C24H43O8P	491.204	0.0736843
Peak_07531	PA(17:1/4:1)	C24H43O8P	491.204	0.0736843
Peak_07531	PA(17:1/4:1)	C24H43O8P	491.204	0.0736843
Peak_22622	PA(18:3_22:6)	C43H67O8P	743.439	0.0265585
Peak_06245	PA(18:4_22:6)	C43H65O8P	739.429	0.004708
Peak_08928	PA(O-20:0/4:1)	C27H53O7P	521.344	0.0167495
Peak_04673	Patuletin 3-(6''-(E)-feruloylglucoside)	C32H30O16	669.243	0.0976
Peak_21017	PC(11:0_20:2)	C39H74NO8P	716.528	0.0043846
Peak_22333	PC(11:0_22:5)	C41H72NO8P	738.505	0.0022034
Peak_06050	PC(11:0_22:6)	C41H70NO8P	734.477	0.001093
Peak_03286	PC(16:1/4:1)	C28H52NO8P	560.317	0.018057
Peak_03286	PC(16:1/4:1)	C28H52NO8P	560.317	0.018057
Peak_03286	PC(16:1/4:1)	C28H52NO8P	560.317	0.018057
Peak_21503	PC(20:5_34:0)	C62H114NO8P	1031.23	0.413793
Peak_16126	PC(22:4/4:1)	C34H58NO8P	640.408	0.0096508
Peak_16126	PC(22:4/4:1)	C34H58NO8P	640.408	0.0096508
Peak_21316	PC(O-16:0/38:0)	C62H126NO7P	1027.22	0.299808
Peak_24862	PC(P-17:0/20:4)/PC(O-17:1/20:4)	C45H82NO7P	780.594	0.0030327
Peak_22330	PE(14:0_22:5)	C41H72NO8P	738.508	0.0003408
Peak_22094	PE(14:1_22:6)	C41H68NO8P	734.48	0.0041628
Peak_04909	PE(32:3)	C37H68NO8P	684.471	0.0107
Peak_04909	PE(32:3)	C37H68NO8P	684.471	0.0107
Peak_04909	PE(32:3)	C37H68NO8P	684.471	0.0107
Peak_05301	PE(34:5)	C39H68NO8P	708.471	0.0107
Peak_05301	PE(34:5)	C39H68NO8P	708.471	0.0107
Peak_05301	PE(34:5)	C39H68NO8P	708.471	0.0107
Peak_02039	PE(O-14:0/2:0)	C21H44NO7P	452.279	0.001458
Peak_02039	PE(O-14:0/2:0)	C21H44NO7P	452.279	0.001458
Peak_02039	PE(O-14:0/2:0)	C21H44NO7P	452.279	0.001458
Peak_24727	PE(P-18:1/22:4)/PE(O-18:2/22:4)	C45H80NO7P	778.572	0.0035037
Peak_02826	Pelargonidin 3-O-(6-O-malonyl-beta-D-glucoside)	C24H23O13	518.145	0.039134
Peak_02826	Pelargonidin 3-O-(6-O-malonyl-beta-D-glucoside)	C24H23O13	518.145	0.039134
Peak_01203	Pentobarbital	C11H18N2O3	227.143	0.0035487
Peak_02371	Peonidin	C16H13O6	302.102	0.0228303
Peak_02272	PG(10:0/4:0)	C20H39O10P	469.229	0.008912
Peak_02272	PG(10:0/4:0)	C20H39O10P	469.229	0.008912
Peak_02272	PG(10:0/4:0)	C20H39O10P	469.229	0.008912
Peak_16068	PG(10:0_16:0)	C32H63O10P	639.422	0.0016452
Peak_17387	PG(10:0_18:4)	C34H59O10P	659.366	0.0270821
Peak_17387	PG(10:0_18:4)	C34H59O10P	659.366	0.0270821
Peak_17387	PG(10:0_18:4)	C34H59O10P	659.366	0.0270821
Peak_07201	PG(11:0/4:1)	C21H39O10P	483.237	0.0013586
Peak_07201	PG(11:0/4:1)	C21H39O10P	483.237	0.0013586
Peak_07201	PG(11:0/4:1)	C21H39O10P	483.237	0.0013586
Peak_20454	PG(11:0_20:1)	C37H71O10P	707.484	0.0028636
Peak_20454	PG(11:0_20:1)	C37H71O10P	707.484	0.0028636
Peak_02872	PG(14:1/4:1)	C24H43O10P	521.276	0.024612
Peak_02872	PG(14:1/4:1)	C24H43O10P	521.276	0.024612
Peak_03360	PG(O-18:0/4:1)	C28H55O9P	565.334	0.016373
Peak_03360	PG(O-18:0/4:1)	C28H55O9P	565.334	0.016373
Peak_03360	PG(O-18:0/4:1)	C28H55O9P	565.334	0.016373
Peak_04068	PG(P-16:1/10:0)/PG(O-16:2/10:0)	C32H61O9P	619.399	0.001677
Peak_04068	PG(P-16:1/10:0)/PG(O-16:2/10:0)	C32H61O9P	619.399	0.001677
Peak_03301	PG(P-18:1/4:1)/PG(O-18:2/4:1)	C28H51O9P	561.318	0.001073
Peak_03301	PG(P-18:1/4:1)/PG(O-18:2/4:1)	C28H51O9P	561.318	0.001073
Peak_03301	PG(P-18:1/4:1)/PG(O-18:2/4:1)	C28H51O9P	561.318	0.001073
Peak_02820	Phellamurin	C26H30O11	517.142	0.0288
Peak_02442	Phenamil	C12H12ClN7O	306.087	0.0002319
Peak_02702	Phenolphthalin	C20H16O4	321.102	0.0108575
Peak_03676	Phe-Thr-Thr	C17H25N3O6	368.192	0.0099693
Peak_09781	Phe-Trp-Trp	C31H31N5O4	538.217	0.0286689
Peak_09781	Phe-Trp-Trp	C31H31N5O4	538.217	0.0286689
Peak_01805	Phlorizin	C21H24O10	435.131	0.0021
Peak_01805	Phlorizin	C21H24O10	435.131	0.0021
Peak_17228	PI(10:0_11:0)	C30H57O13P	657.285	0.0768707
Peak_17228	PI(10:0_11:0)	C30H57O13P	657.285	0.0768707
Peak_04674	PI(10:0_12:0)	C31H59O13P	669.264	0.097333
Peak_19925	PI(10:0_14:0)	C33H63O13P	699.358	0.0510731
Peak_19925	PI(10:0_14:0)	C33H63O13P	699.401	0.0075945
Peak_19925	PI(10:0_14:0)	C33H63O13P	699.397	0.0113691
Peak_19932	PI(10:0_14:0)	C33H63O13P	699.358	0.0510731
Peak_19932	PI(10:0_14:0)	C33H63O13P	699.401	0.0075945
Peak_19932	PI(10:0_14:0)	C33H63O13P	699.358	0.0510731
Peak_19933	PI(10:0_14:0)	C33H63O13P	699.401	0.0075945
Peak_05728	PI(10:0_16:1)	C35H65O13P	723.371	0.037283
Peak_05728	PI(10:0_16:1)	C35H65O13P	723.371	0.037283
Peak_05728	PI(10:0_16:1)	C35H65O13P	723.371	0.037283
Peak_06162	PI(10:0_17:1)	C36H67O13P	737.279	0.144933
Peak_22971	PI(10:0_18:3)	C37H65O13P	749.149	0.27484
Peak_07777	PI(10:0_20:3)	C39H69O13P	775.372	0.067583
Peak_03430	PI(11:0/4:0)	C24H45O13P	571.203	0.048783
Peak_03430	PI(11:0/4:0)	C24H45O13P	573.219	0.0483193
Peak_03430	PI(11:0/4:0)	C24H45O13P	571.203	0.048783
Peak_11828	PI(11:0/4:0)	C24H45O13P	573.219	0.0483193
Peak_11828	PI(11:0/4:0)	C24H45O13P	571.203	0.048783
Peak_11828	PI(11:0/4:0)	C24H45O13P	573.219	0.0483193
Peak_03402	PI(11:0/4:1)	C24H43O13P	569.153	0.083133
Peak_03402	PI(11:0/4:1)	C24H43O13P	569.152	0.084133
Peak_03402	PI(11:0/4:1)	C24H43O13P	569.153	0.083133
Peak_03403	PI(11:0/4:1)	C24H43O13P	569.152	0.084133
Peak_03403	PI(11:0/4:1)	C24H43O13P	569.153	0.083133
Peak_03403	PI(11:0/4:1)	C24H43O13P	569.152	0.084133
Peak_13487	PI(13:0/4:1)	C26H47O13P	599.171	0.112234
Peak_13487	PI(13:0/4:1)	C26H47O13P	599.132	0.151906
Peak_13490	PI(13:0/4:1)	C26H47O13P	599.105	0.178314
Peak_13490	PI(13:0/4:1)	C26H47O13P	599.059	0.224736
Peak_13494	PI(13:0/4:1)	C26H47O13P	599.059	0.224736
Peak_13497	PI(13:0/4:1)	C26H47O13P	599.105	0.178314
Peak_13497	PI(13:0/4:1)	C26H47O13P	599.171	0.112234
Peak_13500	PI(13:0/4:1)	C26H47O13P	599.192	0.0913186
Peak_12551	PI(14:0_22:5)	C45H77O13P	855.305	0.197183
Peak_12557	PI(14:0_22:5)	C45H77O13P	855.383	0.119183
Peak_30430	PI(14:0_24:4)	C47H83O13P	887.568	0.0026985
Peak_14279	PI(14:1/4:1)	C27H47O13P	611.306	0.0222234
Peak_14279	PI(14:1/4:1)	C27H47O13P	611.306	0.0222234
Peak_14279	PI(14:1/4:1)	C27H47O13P	611.306	0.0222234
Peak_04136	PI(15:0/4:1)	C28H51O13P	627.127	0.188079
Peak_04136	PI(15:0/4:1)	C28H51O13P	625.178	0.120733
Peak_15308	PI(15:0/4:1)	C28H51O13P	627.211	0.103517
Peak_15319	PI(15:0/4:1)	C28H51O13P	625.178	0.120733
Peak_15308	PI(15:0_24:4)	C48H85O13P	899.491	0.073783
Peak_16052	PI(16:1/4:1)	C29H51O13P	639.311	0.0041259
Peak_16052	PI(16:1/4:1)	C29H51O13P	639.311	0.0041259
Peak_16052	PI(16:1/4:1)	C29H51O13P	639.311	0.0041259
Peak_32632	PI(16:1_26:2)	C51H93O13P	945.321	0.322301
Peak_32632	PI(16:1_26:2)	C51H93O13P	945.321	0.322301
Peak_17080	PI(17:0/4:1)	C30H55O13P	655.312	0.0337835
Peak_17080	PI(17:0/4:1)	C30H55O13P	655.312	0.0337835
Peak_30762	PI(17:1_22:6)	C48H79O13P	895.504	0.0296569
Peak_32519	PI(18:1_24:4)	C51H89O13P	941.287	0.325103
Peak_32519	PI(18:1_24:4)	C51H89O13P	941.287	0.325103
Peak_32519	PI(18:1_24:4)	C51H89O13P	941.287	0.325103
Peak_31199	PI(18:3_22:6)	C49H77O13P	905.49	0.0280069
Peak_17360	PI(18:3_24:4)	C51H85O13P	935.335	0.229783
Peak_32376	PI(18:3_24:4)	C51H85O13P	937.384	0.196774
Peak_21324	PI(18:3_30:0)	C57H105O13P	1027.33	0.390283
Peak_17142	PI(20:3_22:6)	C51H81O13P	931.232	0.301483
Peak_05775	PI(26:0)	C35H67O13P	725.413	0.0109
Peak_05775	PI(26:0)	C35H67O13P	725.413	0.0109
Peak_32301	PI(42:8)	C51H83O13P	935.296	0.268662
Peak_33046	PI(44:10)	C53H83O13P	959.297	0.267923
Peak_33046	PI(44:10)	C53H83O13P	959.297	0.267923
Peak_22088	PI(50:9)	C59H97O13P	1043.41	0.2447
Peak_22088	PI(50:9)	C59H97O13P	1043.41	0.2447
Peak_22088	PI(50:9)	C59H97O13P	1043.41	0.2447
Peak_29786	PI(O-14:0/24:4)	C47H85O12P	873.585	0.0008241
Peak_29786	PI(O-14:0/24:4)	C47H85O12P	873.585	0.0008241
Peak_28200	PI(P-16:0/20:5)/PI(O-16:1/20:5)	C45H77O12P	841.541	0.0179656
Peak_01337	Piceid	C20H22O8	389.124	0.0005
Peak_17162	PI-Cer(d14:0/11:0)	C31H62NO11P	656.402	0.0120395
Peak_22327	PI-Cer(d14:0/17:1)	C37H72NO11P	738.49	0.0023153
Peak_07618	PI-Cer(d14:0/20:4)	C40H72NO11P	772.204	0.2723
Peak_07620	PI-Cer(d14:0/20:4)	C40H72NO11P	772.213	0.2633
Peak_07621	PI-Cer(d14:0/20:4)	C40H72NO11P	772.183	0.2933
Peak_07623	PI-Cer(d14:0/20:4)	C40H72NO11P	772.155	0.3213
Peak_08910	PI-Cer(d14:0/22:6)	C42H72NO11P	796.236	0.2403
Peak_08910	PI-Cer(d14:0/22:6)	C42H72NO11P	796.236	0.2403
Peak_08910	PI-Cer(d14:0/22:6)	C42H72NO11P	796.236	0.2403
Peak_19603	PI-Cer(d14:1/14:1)	C34H64NO11P	694.29	0.139824
Peak_19603	PI-Cer(d14:1/14:1)	C34H64NO11P	694.403	0.0271794
Peak_19603	PI-Cer(d14:1/14:1)	C34H64NO11P	694.403	0.0271794
Peak_19607	PI-Cer(d14:1/14:1)	C34H64NO11P	694.29	0.139824
Peak_19607	PI-Cer(d14:1/14:1)	C34H64NO11P	694.29	0.139824
Peak_22695	PI-Cer(d14:1/18:4)	C38H66NO11P	744.441	0.0045189
Peak_08791	PI-Cer(d14:1/22:6)	C42H70NO11P	794.235	0.2257
Peak_19723	PI-Cer(d14:2/13:0(OH))	C33H62NO12P	696.251	0.158228
Peak_25091	PI-Cer(d15:1/20:5)	C41H70NO11P	784.231	0.245231
Peak_25091	PI-Cer(d15:1/20:5)	C41H70NO11P	784.279	0.197617
Peak_25091	PI-Cer(d15:1/20:5)	C41H70NO11P	784.231	0.245231
Peak_25095	PI-Cer(d15:1/20:5)	C41H70NO11P	784.231	0.245231
Peak_24959	PI-Cer(d15:2/20:5)	C41H68NO11P	782.276	0.184639
Peak_24959	PI-Cer(d15:2/20:5)	C41H68NO11P	782.276	0.184639
Peak_24959	PI-Cer(d15:2/20:5)	C41H68NO11P	782.276	0.184639
Peak_29708	PI-Cer(d15:2/26:2)	C47H86NO11P	872.268	0.333653
Peak_00634	Picrotin	C15H18O7	309.098	0.0007
Peak_00634	Picrotin	C15H18O7	309.098	0.0007
Peak_04299	Plantamajoside	C29H36O16	639.195	0.002665
Peak_04299	Plantamajoside	C29H36O16	639.195	0.002665
Peak_04299	Plantamajoside	C29H36O16	639.195	0.002665
Peak_04810	Podophyllotoxone	C22H20O8	413.123	0.0009562
Peak_04810	Podophyllotoxone	C22H20O8	413.123	0.0009562
Peak_04810	Podophyllotoxone	C22H20O8	413.123	0.0009562
Peak_07807	Polypodine B	C27H44O8	497.313	0.0012987
Peak_07808	Polypodine B	C27H44O8	497.313	0.0012987
Peak_07808	Polypodine B	C27H44O8	497.312	0.0004094
Peak_07808	Polypodine B	C27H44O8	497.313	0.0012987
Peak_12175	Precorrin-1	C41H46N4O16	849.272	0.010881
Peak_04722	Premithramycin A2'	C33H38O15	673.178	0.0351
Peak_04722	Premithramycin A2'	C33H38O15	673.178	0.0351
Peak_04722	Premithramycin A2'	C33H38O15	673.178	0.0351
Peak_27770	Premithramycin A3	C41H52O18	833.266	0.0569637
Peak_27770	Premithramycin A3	C41H52O18	833.266	0.0569637
Peak_27770	Premithramycin A3	C41H52O18	833.266	0.0569637
Peak_10225	Premithramycin A3'	C40H50O18	817.186	0.1057
Peak_15453	Primary fluorescent chlorophyll catabolite	C35H40N4O7	629.276	0.0219571
Peak_15453	Primary fluorescent chlorophyll catabolite	C35H40N4O7	629.276	0.0219571
Peak_15453	Primary fluorescent chlorophyll catabolite	C35H40N4O7	629.276	0.0219571
Peak_03492	Procyanidin B1	C30H26O12	577.136	0.001569
Peak_12210	Procyanidin B1	C30H26O12	579.154	0.0038033
Peak_12210	Procyanidin B1	C30H26O12	579.154	0.0038033
Peak_12211	Procyanidin B1	C30H26O12	579.152	0.0019553
Peak_02185	Prontosil	C12H13N5O2S	292.092	0.0048429
Peak_02185	Prontosil	C12H13N5O2S	292.092	0.0048429
Peak_04165	Pro-Ser-Trp	C19H24N4O5	389.183	1.43e-05
Peak_03319	Protoaphin aglucone	C30H28O11	563.148	0.007162
Peak_16115	Protorifamycin I	C35H45NO10	640.286	0.0259373
Peak_16115	Protorifamycin I	C35H45NO10	640.286	0.0259373
Peak_16115	Protorifamycin I	C35H45NO10	640.286	0.0259373
Peak_16758	PS(10:0_16:1)	C32H60NO10P	650.209	0.194294
Peak_18572	PS(10:0_18:1)	C34H64NO10P	678.38	0.0546049
Peak_18572	PS(10:0_18:1)	C34H64NO10P	678.38	0.0546049
Peak_18572	PS(10:0_18:1)	C34H64NO10P	678.38	0.0546049
Peak_04682	PS(10:0_18:4)	C34H58NO10P	670.244	0.127837
Peak_05745	PS(10:0_22:5)	C38H64NO10P	724.384	0.034787
Peak_05750	PS(10:0_22:5)	C38H64NO10P	724.183	0.235787
Peak_09160	PS(13:0/4:0)	C23H44NO10P	526.116	0.162189
Peak_09885	PS(14:0/4:0)	C24H46NO10P	540.308	0.0137704
Peak_09885	PS(14:0/4:0)	C24H46NO10P	540.308	0.0137704
Peak_09786	PS(14:0/4:1)	C24H44NO10P	538.31	0.0316199
Peak_09786	PS(14:0/4:1)	C24H44NO10P	538.31	0.0316199
Peak_05783	PS(14:1_18:3)	C38H66NO10P	726.3	0.1344
Peak_09160	PS(15:0_22:2)	C43H80NO10P	800.546	0.002
Peak_26151	PS(15:0_22:2)	C43H80NO10P	802.564	0.0036116
Peak_08556	PS(15:1_22:6)	C43H70NO10P	790.358	0.107737
Peak_08556	PS(15:1_22:6)	C43H70NO10P	790.358	0.107737
Peak_08556	PS(15:1_22:6)	C43H70NO10P	790.358	0.107737
Peak_11392	PS(16:0/4:1)	C26H48NO10P	566.255	0.0542973
Peak_10291	PS(17:1_22:6)	C45H74NO10P	818.188	0.309037
Peak_10802	PS(17:2_22:1)	C45H82NO10P	826.561	0.001363
Peak_10159	PS(17:2_22:6)	C45H72NO10P	816.28	0.201387
Peak_10159	PS(17:2_22:6)	C45H72NO10P	816.28	0.201387
Peak_10159	PS(17:2_22:6)	C45H72NO10P	816.28	0.201387
Peak_27820	PS(18:1_22:6)	C46H76NO10P	834.269	0.259298
Peak_12894	PS(18:2/4:1)	C28H48NO10P	590.228	0.0819017
Peak_27627	PS(18:3_22:6)	C46H72NO10P	830.261	0.235941
Peak_04021	PS(20:2/4:1)	C30H52NO10P	616.161	0.163887
Peak_04021	PS(20:2/4:1)	C30H52NO10P	616.161	0.163887
Peak_12627	PS(20:3_22:6)	C48H76NO10P	856.386	0.126687
Peak_12763	PS(22:4)	C28H46NO10P	588.192	0.10177
Peak_04258	PS(22:6/4:1)	C32H48NO10P	636.166	0.127587
Peak_04258	PS(22:6/4:1)	C32H48NO10P	638.275	0.0345202
Peak_15989	PS(22:6/4:1)	C32H48NO10P	638.275	0.0345202
Peak_15989	PS(22:6/4:1)	C32H48NO10P	638.275	0.0345202
Peak_15989	PS(22:6/4:1)	C32H48NO10P	636.166	0.127587
Peak_05697	PS(32:6)	C38H62NO10P	722.37	0.0331
Peak_05697	PS(32:6)	C38H62NO10P	722.37	0.0331
Peak_05697	PS(32:6)	C38H62NO10P	722.37	0.0331
Peak_18784	PS(50:10)	C56H90NO10P	966.334	0.2882
Peak_18784	PS(50:10)	C56H90NO10P	966.334	0.2882
Peak_34077	PS(52:8)	C58H98NO10P	1000.65	0.0493012
Peak_22606	PS(O-18:0/38:0)	C62H124NO9P	1057.33	0.435628
Peak_22607	PS(O-18:0/38:0)	C62H124NO9P	1057.3	0.408628
Peak_10176	PS(P-18:1/22:6)/PS(O-18:2/22:6)	C46H76NO9P	816.51	0.007772
Peak_13943	PS(P-20:0/4:1)/PS(O-20:1/4:1)	C30H56NO9P	606.283	0.0938399
Peak_13943	PS(P-20:0/4:1)/PS(O-20:1/4:1)	C30H56NO9P	606.283	0.0938399
Peak_05824	PS(P-34:9)/PS(O-34:10)	C40H60NO9P	728.163	0.2296
Peak_21827	PS(P-34:9)/PS(O-34:10)	C40H60NO9P	730.281	0.127894
Peak_23638	PS(P-36:8)/PS(O-36:9)	C42H66NO9P	760.203	0.252756
Peak_26931	PS(P-40:8)/PS(O-40:9)	C46H74NO9P	816.317	0.200665
Peak_26932	PS(P-40:8)/PS(O-40:9)	C46H74NO9P	816.319	0.198706
Peak_26932	PS(P-40:8)/PS(O-40:9)	C46H74NO9P	816.362	0.156281
Peak_26933	PS(P-40:8)/PS(O-40:9)	C46H74NO9P	816.285	0.233135
Peak_26933	PS(P-40:8)/PS(O-40:9)	C46H74NO9P	816.317	0.200665
Peak_26934	PS(P-40:8)/PS(O-40:9)	C46H74NO9P	816.319	0.198706
Peak_26934	PS(P-40:8)/PS(O-40:9)	C46H74NO9P	816.362	0.156281
Peak_13389	PS(P-44:9)/PS(O-44:10)	C50H80NO9P	868.533	0.0161
Peak_02762	Pyochelin	C14H16N2O3S2	325.069	0.0007632
Peak_02762	Pyochelin	C14H16N2O3S2	325.069	0.0007632
Peak_01068	Pyrimidine nucleoside	C9H13N2O4	214.095	0.0001811
Peak_01068	Pyrimidine nucleoside	C9H13N2O4	214.095	0.0001811
Peak_01068	Pyrimidine nucleoside	C9H13N2O4	214.095	0.0001811
Peak_10506	Quercetin 3-O-malonylglucoside	C24H22O15	551.155	0.0508264
Peak_10506	Quercetin 3-O-malonylglucoside	C24H22O15	551.155	0.0508264
Peak_17150	Rifamycin W	C35H45NO11	656.311	0.0039159
Peak_17150	Rifamycin W	C35H45NO11	656.283	0.0245939
Peak_17150	Rifamycin W	C35H45NO11	656.283	0.0245939
Peak_17154	Rifamycin W	C35H45NO11	656.283	0.0245939
Peak_06876	Robustaol A	C25H30O9	475.177	0.0204673
Peak_06876	Robustaol A	C25H30O9	475.177	0.0204673
Peak_01008	Rosiglitazone	C18H19N3O3S	356.107	0.0003
Peak_01008	Rosiglitazone	C18H19N3O3S	356.107	0.0003
Peak_03603	Rufloxacin	C17H18FN3O3S	364.114	0.0009747
Peak_03906	Rutin	C27H30O16	609.151	0.005615
Peak_03906	Rutin	C27H30O16	609.151	0.005615
Peak_04068	S-Adenosylhomocysteine	C14H20N6O5S	385.129	0.000425
Peak_04068	S-Adenosylhomocysteine	C14H20N6O5S	385.129	0.000425
Peak_00490	Salicin	C13H18O7	287.111	0.00223
Peak_02096	Salicin	C13H18O7	287.114	0.0007733
Peak_02096	Salicin	C13H18O7	287.111	0.00223
Peak_02096	Salicin	C13H18O7	285.098	0.0007
Peak_02097	Salicin	C13H18O7	287.114	0.0007733
Peak_02097	Salicin	C13H18O7	287.111	0.00223
Peak_20566	Sanggenon C	C40H36O12	709.202	0.0270009
Peak_20566	Sanggenon C	C40H36O12	709.202	0.0270009
Peak_01314	Secologanin	C17H24O10	387.139	0.01
Peak_01314	Secologanin	C17H24O10	387.139	0.01
Peak_20050	Septentriodine	C37H52N2O11	701.362	0.0030024
Peak_01693	S-Glutathionyl-cysteine	C13H22N4O8S2	425.102	0.02209
Peak_05232	S-Glutathionyl-cysteine	C13H22N4O8S2	427.105	0.0089429
Peak_07198	Silychristin	C25H22O10	483.135	0.0054083
Peak_01453	sn-Glycero-3-phosphoglycerol	C6H15O8P	247.045	0.0130376
Peak_01453	sn-Glycero-3-phosphoglycerol	C6H15O8P	247.045	0.0130376
Peak_01453	sn-Glycero-3-phosphoglycerol	C6H15O8P	247.045	0.0130376
Peak_04675	S-Succinylglutathione	C14H21N3O9S	408.034	0.0734835
Peak_04675	S-Succinylglutathione	C14H21N3O9S	408.034	0.0734835
Peak_04675	S-Succinylglutathione	C14H21N3O9S	408.034	0.0734835
Peak_00612	Stealthin C	C18H13NO4	306.077	0.0005
Peak_17557	Streptomycin 6-phosphate	C21H40N7O15P	662.224	0.0158333
Peak_00223	Styrene	C8H8	105.071	0.000359
Peak_00223	Styrene	C8H8	105.071	0.000359
Peak_00223	Styrene	C8H8	105.071	0.000359
Peak_01961	Sulfamonomethoxine	C11H12N4O3S	281.074	0.0025214
Peak_04112	Sulfentrazone	C11H10Cl2F2N4O3S	387.033	0.0433072
Peak_03512	Taurochenodeoxycholic acid 7-sulfate	C26H45NO9S2	578.273	0.0274
Peak_03516	Taurochenodeoxycholic acid 7-sulfate	C26H45NO9S2	578.139	0.1066
Peak_03516	Taurochenodeoxycholic acid 7-sulfate	C26H45NO9S2	580.157	0.104444
Peak_12272	Taurochenodeoxycholic acid 7-sulfate	C26H45NO9S2	578.273	0.0274
Peak_12272	Taurochenodeoxycholic acid 7-sulfate	C26H45NO9S2	580.157	0.104444
Peak_12276	Taurochenodeoxycholic acid 7-sulfate	C26H45NO9S2	580.181	0.0809443
Peak_17452	Taurolithocholic acid 3-glucuronide	C32H53NO11S	660.37	0.0277874
Peak_17452	Taurolithocholic acid 3-glucuronide	C32H53NO11S	660.37	0.0277874
Peak_17452	Taurolithocholic acid 3-glucuronide	C32H53NO11S	660.37	0.0277874
Peak_02422	Taxifolin	C15H12O7	305.064	0.0022651
Peak_09761	Telithromycin	C43H65N5O10	810.231	0.234143
Peak_09761	Telithromycin	C43H65N5O10	810.231	0.234143
Peak_02283	Terfenadine	C32H41NO2	470.233	0.07273
Peak_01262	Tetracenomycin F2	C20H16O8	383.061	0.0155
Peak_01262	Tetracenomycin F2	C20H16O8	383.061	0.0155
Peak_03597	Tetracosatrienoic acid	C24H42O2	363.615	0.288492
Peak_03597	Tetracosatrienoic acid	C24H42O2	363.615	0.288492
Peak_00724	Tetrangomycin	C19H14O5	321.074	0.0021
Peak_00724	Tetrangomycin	C19H14O5	321.074	0.0021
Peak_15075	Thalmidine	C38H42N2O6	623.278	0.0338591
Peak_15075	Thalmidine	C38H42N2O6	623.278	0.0338591
Peak_15075	Thalmidine	C38H42N2O6	623.278	0.0338591
Peak_11327	Theaflavin	C29H24O12	565.121	0.0142333
Peak_00438	Thyronine	C15H15NO4	272.086	0.0061
Peak_00438	Thyronine	C15H15NO4	272.086	0.0061
Peak_33541	trans-Tetradec-2-enoyl-CoA	C35H60N7O17P3S	976.325	0.0194381
Peak_33541	trans-Tetradec-2-enoyl-CoA	C35H60N7O17P3S	976.325	0.0194381
Peak_01616	Trehalose 6-phosphate	C12H23O14P	421.003	0.071542
Peak_01616	Trehalose 6-phosphate	C12H23O14P	421.003	0.071542
Peak_01618	Trehalose 6-phosphate	C12H23O14P	421.032	0.042542
Peak_09883	Troleandomycin	C41H67NO15	812.231	0.212075
Peak_09883	Troleandomycin	C41H67NO15	812.231	0.212075
Peak_09883	Troleandomycin	C41H67NO15	812.231	0.212075
Peak_05609	Trypanothione disulfide	C27H47N9O10S2	720.188	0.09273
Peak_14201	Tubocurarine	C37H41N2O6	610.304	0.0006901
Peak_14201	Tubocurarine	C37H41N2O6	610.304	0.0006901
Peak_14201	Tubocurarine	C37H41N2O6	610.304	0.0006901
Peak_01965	Tyr-Val	C14H20N2O4	281.156	0.0052472
Peak_01965	Tyr-Val	C14H20N2O4	281.156	0.0052472
Peak_01965	Tyr-Val	C14H20N2O4	281.156	0.0052472
Peak_00351	Ureidoacrylic acid	C4H6N2O3	131.05	0.004312
Peak_00642	Uric acid	C5H4N4O3	169.036	0.0002756
Peak_14056	Uridine 5'-Diphospho-N-acetylgalactosamine	C17H27N3O17P2	607.909	0.178566
Peak_14056	Uridine 5'-Diphospho-N-acetylgalactosamine	C17H27N3O17P2	607.909	0.178566
Peak_01105	Velloquercetin	C20H16O7	367.089	0.0074
Peak_02146	Verbasoside	C20H30O12	461.146	0.0197
Peak_04702	Wybutoxine	C16H20N6O7	409.027	0.120688
Peak_04702	Wybutoxine	C16H20N6O7	409.027	0.120688
Peak_07156	Yersiniabactin	C21H27N3O4S3	482.112	0.0121301
Peak_11592	Zeaxanthin	C40H56O2	569.447	0.0110468
Peak_11592	Zeaxanthin	C40H56O2	569.447	0.0110468
